# Supplementary material
Source: publisher figshare collection journal article supplement (https://acs.figshare.com/ndownloader/files/8412764)
Supplement: Supplementary file 1 [file 8412764]

## Sheet: UniAllPairWithParaCompxCrpNameB
protein1	protein2	pName1	pName2	score	assay1	assay2	CommAssay	intAct	BiogridInt	pathC1	pathC2	ComPath	ComPathCount	ComGenesCount	Paralog	ComplexFound	Crap	BPComCont	BPCom	MFComCont	MFCom	CCComCont	CcCom
P13645	P35908	Keratin, type I cytoskeletal 10 (Cytokeratin-10) (CK-10) (Keratin-10) (K10)	Keratin, type II cytoskeletal 2 epidermal (Cytokeratin-2e) (CK-2e) (Epithelial keratin-2e) (Keratin-2 epidermis) (Keratin-2e) (K2e) (Type-II keratin Kb2)	0.77	962	1090	835	0	yes	0	0	NF	0	0	No	NA	Yes	0	NF	0	NF	6	extracellular exosome [GO:0070062];cytoplasm [GO:0005737];extracellular space [GO:0005615];membrane [GO:0016020];intermediate filament [GO:0005882];nucleus [GO:0005634]
P04279	Q02383	Semenogelin-1 (Cancer/testis antigen 103) (Semenogelin I) (SGI) [Cleaved into: Alpha-inhibin-92; Alpha-inhibin-31; Seminal basic protein]	Semenogelin-2 (Semenogelin II) (SGII)	0.72	54	43	40	0	NA	1	0	NF	0	0	yes	NA	No	5	positive regulation of serine-type endopeptidase activity [GO:1900005];antibacterial humoral response [GO:0019731];coagulation [GO:0050817];negative regulation of sperm motility [GO:1901318];protein heterooligomerization [GO:0051291]	1	metal ion binding [GO:0046872]	3	nucleus [GO:0005634];extracellular space [GO:0005615];extracellular exosome [GO:0070062]
O76009	A6NCN2	Keratin, type I cuticular Ha3-I (Hair keratin, type I Ha3-I) (Keratin-33A) (K33A)	Putative keratin-87 protein (Keratin, hair, basic pseudogene 4) (Keratin-121 pseudogene)	0.7	29	23	17	0	no	0	0	NF	0	NA	NA	NA	Yes	1		1	structural molecule activity [GO:0005198]	1	extracellular space [GO:0005615]
P13645	P35527	Keratin, type I cytoskeletal 10 (Cytokeratin-10) (CK-10) (Keratin-10) (K10)	Keratin, type I cytoskeletal 9 (Cytokeratin-9) (CK-9) (Keratin-9) (K9)	0.67	962	747	665	0	no	0	0	NF	0	0	No	NA	Yes	0	NF	0	NF	5	intermediate filament [GO:0005882];nucleus [GO:0005634];extracellular space [GO:0005615];extracellular exosome [GO:0070062];membrane [GO:0016020]
P07437	P68363	Tubulin beta chain (Tubulin beta-5 chain)	Tubulin alpha-1B chain (Alpha-tubulin ubiquitous) (Tubulin K-alpha-1) (Tubulin alpha-ubiquitous chain)	0.66	1570	1662	1493	0	yes	6	21	NF	0	0	No	NF	No	3	cell division [GO:0051301];microtubule-based process [GO:0007017];cytoskeleton-dependent intracellular transport [GO:0030705]	5	structural molecule activity [GO:0005198];GTPase activity [GO:0003924];structural constituent of cytoskeleton [GO:0005200];ubiquitin protein ligase binding [GO:0031625];GTP binding [GO:0005525]	2	extracellular exosome [GO:0070062];microtubule [GO:0005874]
P15538	P08686	Cytochrome P450 11B1, mitochondrial (CYPXIB1) (Cytochrome P-450c11) (Cytochrome P450C11) (Steroid 11-beta-hydroxylase) (EC 1.14.15.4)	Steroid 21-hydroxylase (EC 1.14.14.16) (21-OHase) (Cytochrome P-450c21) (Cytochrome P450 21) (Cytochrome P450 XXI) (Cytochrome P450-C21) (Cytochrome P450-C21B)	0.66	42	43	42	0	NA	3	4	R-HSA-194002;R-HSA-211976	2	0	No	NA	No	2	sterol metabolic process [GO:0016125];glucocorticoid biosynthetic process [GO:0006704]	2	heme binding [GO:0020037];iron ion binding [GO:0005506]	0	NF
P07437	Q71U36	Tubulin beta chain (Tubulin beta-5 chain)	Tubulin alpha-1A chain (Alpha-tubulin 3) (Tubulin B-alpha-1) (Tubulin alpha-3 chain)	0.66	1570	1654	1490	0	yes	6	28	R-HSA-380284;R-HSA-380259;R-HSA-2565942;R-HSA-5620912;R-HSA-380270;R-HSA-8854518	6	0	No	NF	No	4	cell division [GO:0051301];microtubule-based process [GO:0007017];G2/M transition of mitotic cell cycle [GO:0000086];cytoskeleton-dependent intracellular transport [GO:0030705]	4	structural molecule activity [GO:0005198];GTPase activity [GO:0003924];structural constituent of cytoskeleton [GO:0005200];GTP binding [GO:0005525]	4	nucleus [GO:0005634];extracellular exosome [GO:0070062];cytoplasmic ribonucleoprotein granule [GO:0036464];microtubule [GO:0005874]
Q9BQE3	P07437	Tubulin alpha-1C chain (Alpha-tubulin 6) (Tubulin alpha-6 chain)	Tubulin beta chain (Tubulin beta-5 chain)	0.66	1659	1570	1493	1	yes	22	6	NF	0	0	No	NF	No	3	cell division [GO:0051301];microtubule-based process [GO:0007017];cytoskeleton-dependent intracellular transport [GO:0030705]	4	structural molecule activity [GO:0005198];GTPase activity [GO:0003924];structural constituent of cytoskeleton [GO:0005200];GTP binding [GO:0005525]	2	nucleus [GO:0005634];microtubule [GO:0005874]
P35908	P35527	Keratin, type II cytoskeletal 2 epidermal (Cytokeratin-2e) (CK-2e) (Epithelial keratin-2e) (Keratin-2 epidermis) (Keratin-2e) (K2e) (Type-II keratin Kb2)	Keratin, type I cytoskeletal 9 (Cytokeratin-9) (CK-9) (Keratin-9) (K9)	0.66	1090	747	682	0	no	0	0	NF	0	0	No	NA	Yes	1	epidermis development [GO:0008544]	1	structural constituent of cytoskeleton [GO:0005200]	5	intermediate filament [GO:0005882];nucleus [GO:0005634];extracellular space [GO:0005615];extracellular exosome [GO:0070062];membrane [GO:0016020]
Q01082	Q13813	Spectrin beta chain, non-erythrocytic 1 (Beta-II spectrin) (Fodrin beta chain) (Spectrin, non-erythroid beta chain 1)	Spectrin alpha chain, non-erythrocytic 1 (Alpha-II spectrin) (Fodrin alpha chain) (Spectrin, non-erythroid alpha subunit)	0.65	1259	1227	1107	1	NA	5	6	R-HSA-445095;R-HSA-5673001;R-HSA-6807878;R-HSA-373753;R-HSA-375165	5	0	yes	NA	No	4	actin filament capping [GO:0051693];MAPK cascade [GO:0000165];axon guidance [GO:0007411];ER to Golgi vesicle-mediated transport [GO:0006888]	4	cadherin binding involved in cell-cell adhesion [GO:0098641];actin binding [GO:0003779];Ras guanyl-nucleotide exchange factor activity [GO:0005088];structural constituent of cytoskeleton [GO:0005200]	4	spectrin [GO:0008091];cell-cell adherens junction [GO:0005913];cytosol [GO:0005829];extracellular exosome [GO:0070062]
Q13748	P68371	Tubulin alpha-3C/D chain (Alpha-tubulin 2) (Alpha-tubulin 3C/D) (Tubulin alpha-2 chain)	Tubulin beta-4B chain (Tubulin beta-2 chain) (Tubulin beta-2C chain)	0.64	1599	1553	1452	0	yes	22	28	R-HSA-68877;R-HSA-190861;R-HSA-5610787;R-HSA-2467813;R-HSA-6807878;R-HSA-983189;R-HSA-190840;R-HSA-1445148;R-HSA-5617833;R-HSA-437239;R-HSA-380320;R-HSA-389960;R-HSA-5620924;R-HSA-6811436;R-HSA-389957;R-HSA-6811434;R-HSA-389977;R-HSA-2500257;R-HSA-5663220;R-HSA-2132295;R-HSA-8852276;R-HSA-5626467	22	0	No	NA	No	1	microtubule-based process [GO:0007017]	3	GTPase activity [GO:0003924];structural constituent of cytoskeleton [GO:0005200];GTP binding [GO:0005525]	2	nucleus [GO:0005634];microtubule [GO:0005874]
P13645	P04264	Keratin, type I cytoskeletal 10 (Cytokeratin-10) (CK-10) (Keratin-10) (K10)	Keratin, type II cytoskeletal 1 (67 kDa cytokeratin) (Cytokeratin-1) (CK-1) (Hair alpha protein) (Keratin-1) (K1) (Type-II keratin Kb1)	0.64	962	1246	878	0	yes	0	0	NF	0	0	No	NA	Yes	0	NF	0	NF	4	nucleus [GO:0005634];extracellular space [GO:0005615];extracellular exosome [GO:0070062];membrane [GO:0016020]
P07437	Q13748	Tubulin beta chain (Tubulin beta-5 chain)	Tubulin alpha-3C/D chain (Alpha-tubulin 2) (Alpha-tubulin 3C/D) (Tubulin alpha-2 chain)	0.64	1570	1599	1468	0	no	6	22	NF	0	0	No	NA	No	1	microtubule-based process [GO:0007017]	3	GTPase activity [GO:0003924];structural constituent of cytoskeleton [GO:0005200];GTP binding [GO:0005525]	2	nucleus [GO:0005634];microtubule [GO:0005874]
Q71U36	P68371	Tubulin alpha-1A chain (Alpha-tubulin 3) (Tubulin B-alpha-1) (Tubulin alpha-3 chain)	Tubulin beta-4B chain (Tubulin beta-2 chain) (Tubulin beta-2C chain)	0.63	1654	1553	1478	0	yes	28	28	R-HSA-68877;R-HSA-5610787;R-HSA-2467813;R-HSA-6807878;R-HSA-1445148;R-HSA-437239;R-HSA-380320;R-HSA-389960;R-HSA-2565942;R-HSA-5620924;R-HSA-6811436;R-HSA-389957;R-HSA-6811434;R-HSA-389977;R-HSA-5663220;R-HSA-380259;R-HSA-2132295;R-HSA-8852276;R-HSA-380270;R-HSA-190861;R-HSA-983189;R-HSA-190840;R-HSA-5617833;R-HSA-5620912;R-HSA-380284;R-HSA-2500257;R-HSA-5626467;R-HSA-8854518	28	0	No	NA	No	2	G2/M transition of mitotic cell cycle [GO:0000086];microtubule-based process [GO:0007017]	3	GTPase activity [GO:0003924];structural constituent of cytoskeleton [GO:0005200];GTP binding [GO:0005525]	5	myelin sheath [GO:0043209];microtubule [GO:0005874];nucleus [GO:0005634];cytosol [GO:0005829];extracellular exosome [GO:0070062]
P07437	P68366	Tubulin beta chain (Tubulin beta-5 chain)	Tubulin alpha-4A chain (Alpha-tubulin 1) (Testis-specific alpha-tubulin) (Tubulin H2-alpha) (Tubulin alpha-1 chain)	0.63	1570	1599	1460	0	yes	6	29	R-HSA-380284;R-HSA-380259;R-HSA-2565942;R-HSA-5620912;R-HSA-380270;R-HSA-8854518	6	0	No	1400_ASCOM complex	No	2	G2/M transition of mitotic cell cycle [GO:0000086];microtubule-based process [GO:0007017]	3	GTPase activity [GO:0003924];structural constituent of cytoskeleton [GO:0005200];GTP binding [GO:0005525]	3	extracellular region [GO:0005576];extracellular exosome [GO:0070062];microtubule [GO:0005874]
P10632	Q16696	Cytochrome P450 2C8 (EC 1.14.14.1) (CYPIIC8) (Cytochrome P450 IIC2) (Cytochrome P450 MP-12) (Cytochrome P450 MP-20) (Cytochrome P450 form 1) (S-mephenytoin 4-hydroxylase)	Cytochrome P450 2A13 (EC 1.14.14.1) (CYPIIA13)	0.63	54	58	48	0	no	4	4	R-HSA-211981;R-HSA-211999	2	0	yes	NA	No	2	xenobiotic metabolic process [GO:0006805];epoxygenase P450 pathway [GO:0019373]	6	oxygen binding [GO:0019825];arachidonic acid epoxygenase activity [GO:0008392];heme binding [GO:0020037];iron ion binding [GO:0005506];aromatase activity [GO:0070330];steroid hydroxylase activity [GO:0008395]	2	organelle membrane [GO:0031090];endoplasmic reticulum membrane [GO:0005789]
Q9BQE3	P68371	Tubulin alpha-1C chain (Alpha-tubulin 6) (Tubulin alpha-6 chain)	Tubulin beta-4B chain (Tubulin beta-2 chain) (Tubulin beta-2C chain)	0.63	1659	1553	1480	1	yes	22	28	R-HSA-68877;R-HSA-190861;R-HSA-5610787;R-HSA-2467813;R-HSA-6807878;R-HSA-983189;R-HSA-190840;R-HSA-1445148;R-HSA-5617833;R-HSA-437239;R-HSA-380320;R-HSA-389960;R-HSA-5620924;R-HSA-6811436;R-HSA-389957;R-HSA-6811434;R-HSA-389977;R-HSA-2500257;R-HSA-5663220;R-HSA-2132295;R-HSA-8852276;R-HSA-5626467	22	0	No	NA	No	1	microtubule-based process [GO:0007017]	3	GTPase activity [GO:0003924];structural constituent of cytoskeleton [GO:0005200];GTP binding [GO:0005525]	2	nucleus [GO:0005634];microtubule [GO:0005874]
P68366	P68371	Tubulin alpha-4A chain (Alpha-tubulin 1) (Testis-specific alpha-tubulin) (Tubulin H2-alpha) (Tubulin alpha-1 chain)	Tubulin beta-4B chain (Tubulin beta-2 chain) (Tubulin beta-2C chain)	0.63	1599	1553	1447	0	yes	29	28	R-HSA-68877;R-HSA-5610787;R-HSA-2467813;R-HSA-6807878;R-HSA-1445148;R-HSA-437239;R-HSA-380320;R-HSA-389960;R-HSA-2565942;R-HSA-5620924;R-HSA-6811436;R-HSA-389957;R-HSA-6811434;R-HSA-389977;R-HSA-5663220;R-HSA-380259;R-HSA-2132295;R-HSA-8852276;R-HSA-380270;R-HSA-190861;R-HSA-983189;R-HSA-190840;R-HSA-5617833;R-HSA-5620912;R-HSA-380284;R-HSA-2500257;R-HSA-5626467;R-HSA-8854518	28	0	No	NA	No	2	G2/M transition of mitotic cell cycle [GO:0000086];microtubule-based process [GO:0007017]	3	GTPase activity [GO:0003924];structural constituent of cytoskeleton [GO:0005200];GTP binding [GO:0005525]	3	microtubule [GO:0005874];cytosol [GO:0005829];extracellular exosome [GO:0070062]
P68363	P68371	Tubulin alpha-1B chain (Alpha-tubulin ubiquitous) (Tubulin K-alpha-1) (Tubulin alpha-ubiquitous chain)	Tubulin beta-4B chain (Tubulin beta-2 chain) (Tubulin beta-2C chain)	0.62	1662	1553	1480	0	yes	21	28	R-HSA-68877;R-HSA-190861;R-HSA-5610787;R-HSA-2467813;R-HSA-6807878;R-HSA-983189;R-HSA-190840;R-HSA-1445148;R-HSA-5617833;R-HSA-437239;R-HSA-380320;R-HSA-389960;R-HSA-5620924;R-HSA-6811436;R-HSA-6811434;R-HSA-2500257;R-HSA-5663220;R-HSA-389977;R-HSA-2132295;R-HSA-8852276;R-HSA-5626467	21	0	No	NA	No	1	microtubule-based process [GO:0007017]	4	structural constituent of cytoskeleton [GO:0005200];GTPase activity [GO:0003924];double-stranded RNA binding [GO:0003725];GTP binding [GO:0005525]	3	myelin sheath [GO:0043209];extracellular exosome [GO:0070062];microtubule [GO:0005874]
Q9BVA1	Q13748	Tubulin beta-2B chain	Tubulin alpha-3C/D chain (Alpha-tubulin 2) (Alpha-tubulin 3C/D) (Tubulin alpha-2 chain)	0.61	1478	1599	1390	0	no	22	22	R-HSA-68877;R-HSA-190861;R-HSA-5610787;R-HSA-2467813;R-HSA-6807878;R-HSA-983189;R-HSA-190840;R-HSA-1445148;R-HSA-5617833;R-HSA-437239;R-HSA-380320;R-HSA-389960;R-HSA-5620924;R-HSA-6811436;R-HSA-389957;R-HSA-6811434;R-HSA-389977;R-HSA-2500257;R-HSA-5663220;R-HSA-2132295;R-HSA-8852276;R-HSA-5626467	22	0	No	NA	No	1	microtubule-based process [GO:0007017]	3	GTPase activity [GO:0003924];structural constituent of cytoskeleton [GO:0005200];GTP binding [GO:0005525]	3	nucleus [GO:0005634];cytoplasm [GO:0005737];microtubule [GO:0005874]
Q13885	Q13748	Tubulin beta-2A chain (Tubulin beta class IIa)	Tubulin alpha-3C/D chain (Alpha-tubulin 2) (Alpha-tubulin 3C/D) (Tubulin alpha-2 chain)	0.61	1484	1599	1394	0	no	22	22	R-HSA-68877;R-HSA-190861;R-HSA-5610787;R-HSA-2467813;R-HSA-6807878;R-HSA-983189;R-HSA-190840;R-HSA-1445148;R-HSA-5617833;R-HSA-437239;R-HSA-380320;R-HSA-389960;R-HSA-5620924;R-HSA-6811436;R-HSA-389957;R-HSA-6811434;R-HSA-389977;R-HSA-2500257;R-HSA-5663220;R-HSA-2132295;R-HSA-8852276;R-HSA-5626467	22	0	No	NA	No	1	microtubule-based process [GO:0007017]	3	GTPase activity [GO:0003924];structural constituent of cytoskeleton [GO:0005200];GTP binding [GO:0005525]	3	nucleus [GO:0005634];cytoplasm [GO:0005737];microtubule [GO:0005874]
P68366	Q13885	Tubulin alpha-4A chain (Alpha-tubulin 1) (Testis-specific alpha-tubulin) (Tubulin H2-alpha) (Tubulin alpha-1 chain)	Tubulin beta-2A chain (Tubulin beta class IIa)	0.61	1599	1484	1391	0	yes	29	22	R-HSA-68877;R-HSA-5610787;R-HSA-2467813;R-HSA-6807878;R-HSA-1445148;R-HSA-437239;R-HSA-380320;R-HSA-389960;R-HSA-5620924;R-HSA-6811436;R-HSA-389957;R-HSA-6811434;R-HSA-389977;R-HSA-5663220;R-HSA-2132295;R-HSA-8852276;R-HSA-190861;R-HSA-983189;R-HSA-190840;R-HSA-5617833;R-HSA-2500257;R-HSA-5626467	22	0	No	NA	No	1	microtubule-based process [GO:0007017]	3	GTPase activity [GO:0003924];structural constituent of cytoskeleton [GO:0005200];GTP binding [GO:0005525]	2	extracellular exosome [GO:0070062];microtubule [GO:0005874]
Q9BVA1	P68366	Tubulin beta-2B chain	Tubulin alpha-4A chain (Alpha-tubulin 1) (Testis-specific alpha-tubulin) (Tubulin H2-alpha) (Tubulin alpha-1 chain)	0.61	1478	1599	1387	0	yes	22	29	R-HSA-68877;R-HSA-190861;R-HSA-5610787;R-HSA-2467813;R-HSA-6807878;R-HSA-983189;R-HSA-190840;R-HSA-1445148;R-HSA-5617833;R-HSA-437239;R-HSA-380320;R-HSA-389960;R-HSA-5620924;R-HSA-6811436;R-HSA-389957;R-HSA-6811434;R-HSA-389977;R-HSA-2500257;R-HSA-5663220;R-HSA-2132295;R-HSA-8852276;R-HSA-5626467	22	0	No	NF	No	1	microtubule-based process [GO:0007017]	3	GTPase activity [GO:0003924];structural constituent of cytoskeleton [GO:0005200];GTP binding [GO:0005525]	1	microtubule [GO:0005874]
Q6PEY2	P68371	Tubulin alpha-3E chain (Alpha-tubulin 3E)	Tubulin beta-4B chain (Tubulin beta-2 chain) (Tubulin beta-2C chain)	0.6	1579	1553	1436	0	no	19	28	R-HSA-68877;R-HSA-190861;R-HSA-2467813;R-HSA-6807878;R-HSA-983189;R-HSA-1445148;R-HSA-190840;R-HSA-5617833;R-HSA-437239;R-HSA-380320;R-HSA-389960;R-HSA-6811436;R-HSA-6811434;R-HSA-2500257;R-HSA-5663220;R-HSA-389977;R-HSA-2132295;R-HSA-8852276;R-HSA-5626467	19	0	No	NA	No	1	microtubule-based process [GO:0007017]	3	GTPase activity [GO:0003924];structural constituent of cytoskeleton [GO:0005200];GTP binding [GO:0005525]	2	nucleus [GO:0005634];microtubule [GO:0005874]
P08238	P07900	Heat shock protein HSP 90-beta (HSP 90) (Heat shock 84 kDa) (HSP 84) (HSP84)	Heat shock protein HSP 90-alpha (Heat shock 86 kDa) (HSP 86) (HSP86) (Lipopolysaccharide-associated protein 2) (LAP-2) (LPS-associated protein 2) (Renal carcinoma antigen NY-REN-38)	0.6	1264	1212	1053	1	yes	8	24	R-HSA-3371511;R-HSA-3371571;R-HSA-3371568;R-HSA-8852276;R-HSA-399954;R-HSA-2029482;R-HSA-5336415	7	0	yes	4158_HSP90-FKBP38-CAM-Ca(2+) complex;5268_TNF-alpha/NF-kappa B signaling complex 7;5286_TNF-alpha/NF-kappa B signaling complex 10;5269_TNF-alpha/NF-kappa B signaling complex 8;5199_Kinase maturation complex 1;5234_IKBKB-CDC37-KIAA1967-HSP90AB1-HSP90AA1 complex;5212_Kinase maturation complex 2;2721_HCF-1 complex;5266_TNF-alpha/NF-kappa B signaling complex 6	No	9	response to unfolded protein [GO:0006986];regulation of cellular response to heat [GO:1900034];regulation of protein ubiquitination [GO:0031396];response to salt stress [GO:0009651];positive regulation of cell size [GO:0045793];positive regulation of protein import into nucleus, translocation [GO:0033160];positive regulation of nitric oxide biosynthetic process [GO:0045429];Fc-gamma receptor sign…	10	histone deacetylase binding [GO:0042826];CTP binding [GO:0002135];TPR domain binding [GO:0030911];nitric-oxide synthase regulator activity [GO:0030235];ATP binding [GO:0005524];UTP binding [GO:0002134];poly(A) RNA binding [GO:0044822];MHC class II protein complex binding [GO:0023026];dATP binding [GO:0032564];GTP binding [GO:0005525]	10	cytosol [GO:0005829];nucleoplasm [GO:0005654];cytoplasm [GO:0005737];apical plasma membrane [GO:0016324];brush border membrane [GO:0031526];cell surface [GO:0009986];membrane [GO:0016020];melanosome [GO:0042470];basolateral plasma membrane [GO:0016323];extracellular exosome [GO:0070062]
P68871	P69905	Hemoglobin subunit beta (Beta-globin) (Hemoglobin beta chain) [Cleaved into: LVV-hemorphin-7; Spinorphin]	Hemoglobin subunit alpha (Alpha-globin) (Hemoglobin alpha chain)	0.6	1338	1227	1158	1	NA	4	3	R-HSA-2168880;R-HSA-1237044;R-HSA-1247673	3	0	yes	NA	Yes	8	oxygen transport [GO:0015671];positive regulation of cell death [GO:0010942];hydrogen peroxide catabolic process [GO:0042744];cellular oxidant detoxification [GO:0098869];response to hydrogen peroxide [GO:0042542];bicarbonate transport [GO:0015701];protein heterooligomerization [GO:0051291];receptor-mediated endocytosis [GO:0006898]	4	heme binding [GO:0020037];iron ion binding [GO:0005506];oxygen binding [GO:0019825];oxygen transporter activity [GO:0005344]	7	cytosol [GO:0005829];endocytic vesicle lumen [GO:0071682];hemoglobin complex [GO:0005833];haptoglobin-hemoglobin complex [GO:0031838];extracellular region [GO:0005576];blood microparticle [GO:0072562];extracellular exosome [GO:0070062]
P11712	P05177	Cytochrome P450 2C9 (EC 1.14.13.-) ((R)-limonene 6-monooxygenase) (EC 1.14.13.80) ((S)-limonene 6-monooxygenase) (EC 1.14.13.48) ((S)-limonene 7-monooxygenase) (EC 1.14.13.49) (CYPIIC9) (Cholesterol 25-hydroxylase) (EC 1.14.99.38) (Cytochrome P-450MP) (Cytochrome P450 MP-4) (Cytochrome P450 MP-8) (Cytochrome P450 PB-1) (S-mephenytoin 4-hydroxylase)	Cytochrome P450 1A2 (EC 1.14.14.1) (CYPIA2) (Cholesterol 25-hydroxylase) (Cytochrome P(3)450) (Cytochrome P450 4) (Cytochrome P450-P3)	0.59	60	54	48	0	no	4	5	R-HSA-2142816;R-HSA-2142670	2	0	No	NA	No	10	exogenous drug catabolic process [GO:0042738];oxidation-reduction process [GO:0055114];oxidative demethylation [GO:0070989];monoterpenoid metabolic process [GO:0016098];xenobiotic metabolic process [GO:0006805];omega-hydroxylase P450 pathway [GO:0097267];drug catabolic process [GO:0042737];epoxygenase P450 pathway [GO:0019373];monocarboxylic acid metabolic process [GO:0032787];drug metabolic proc…	6	caffeine oxidase activity [GO:0034875];oxygen binding [GO:0019825];heme binding [GO:0020037];iron ion binding [GO:0005506];monooxygenase activity [GO:0004497];oxidoreductase activity [GO:0016491]	3	organelle membrane [GO:0031090];intracellular membrane-bounded organelle [GO:0043231];endoplasmic reticulum membrane [GO:0005789]
P68366	P04350	Tubulin alpha-4A chain (Alpha-tubulin 1) (Testis-specific alpha-tubulin) (Tubulin H2-alpha) (Tubulin alpha-1 chain)	Tubulin beta-4A chain (Tubulin 5 beta) (Tubulin beta-4 chain)	0.59	1599	1415	1342	0	yes	29	28	R-HSA-68877;R-HSA-5610787;R-HSA-2467813;R-HSA-6807878;R-HSA-1445148;R-HSA-437239;R-HSA-380320;R-HSA-389960;R-HSA-2565942;R-HSA-5620924;R-HSA-6811436;R-HSA-389957;R-HSA-6811434;R-HSA-389977;R-HSA-5663220;R-HSA-380259;R-HSA-2132295;R-HSA-8852276;R-HSA-380270;R-HSA-190861;R-HSA-983189;R-HSA-190840;R-HSA-5617833;R-HSA-5620912;R-HSA-380284;R-HSA-2500257;R-HSA-5626467;R-HSA-8854518	28	0	No	NA	No	2	G2/M transition of mitotic cell cycle [GO:0000086];microtubule-based process [GO:0007017]	3	GTPase activity [GO:0003924];structural constituent of cytoskeleton [GO:0005200];GTP binding [GO:0005525]	3	microtubule [GO:0005874];cytosol [GO:0005829];extracellular exosome [GO:0070062]
P07437	Q6PEY2	Tubulin beta chain (Tubulin beta-5 chain)	Tubulin alpha-3E chain (Alpha-tubulin 3E)	0.59	1570	1579	1451	0	no	6	19	NF	0	0	No	NA	No	1	microtubule-based process [GO:0007017]	3	GTPase activity [GO:0003924];structural constituent of cytoskeleton [GO:0005200];GTP binding [GO:0005525]	2	nucleus [GO:0005634];microtubule [GO:0005874]
P04350	Q13748	Tubulin beta-4A chain (Tubulin 5 beta) (Tubulin beta-4 chain)	Tubulin alpha-3C/D chain (Alpha-tubulin 2) (Alpha-tubulin 3C/D) (Tubulin alpha-2 chain)	0.59	1415	1599	1339	0	no	28	22	R-HSA-68877;R-HSA-5610787;R-HSA-2467813;R-HSA-6807878;R-HSA-1445148;R-HSA-437239;R-HSA-380320;R-HSA-389960;R-HSA-5620924;R-HSA-6811436;R-HSA-389957;R-HSA-6811434;R-HSA-389977;R-HSA-5663220;R-HSA-2132295;R-HSA-8852276;R-HSA-190861;R-HSA-983189;R-HSA-190840;R-HSA-5617833;R-HSA-2500257;R-HSA-5626467	22	0	No	NA	No	1	microtubule-based process [GO:0007017]	3	GTPase activity [GO:0003924];structural constituent of cytoskeleton [GO:0005200];GTP binding [GO:0005525]	2	nucleus [GO:0005634];microtubule [GO:0005874]
Q6PEY2	Q13885	Tubulin alpha-3E chain (Alpha-tubulin 3E)	Tubulin beta-2A chain (Tubulin beta class IIa)	0.59	1579	1484	1378	0	no	19	22	R-HSA-68877;R-HSA-190861;R-HSA-2467813;R-HSA-6807878;R-HSA-983189;R-HSA-1445148;R-HSA-190840;R-HSA-5617833;R-HSA-437239;R-HSA-380320;R-HSA-389960;R-HSA-6811436;R-HSA-6811434;R-HSA-2500257;R-HSA-5663220;R-HSA-389977;R-HSA-2132295;R-HSA-8852276;R-HSA-5626467	19	0	No	NA	No	1	microtubule-based process [GO:0007017]	3	GTPase activity [GO:0003924];structural constituent of cytoskeleton [GO:0005200];GTP binding [GO:0005525]	3	nucleus [GO:0005634];cytoplasm [GO:0005737];microtubule [GO:0005874]
Q9BVA1	Q6PEY2	Tubulin beta-2B chain	Tubulin alpha-3E chain (Alpha-tubulin 3E)	0.59	1478	1579	1374	0	yes	22	19	R-HSA-68877;R-HSA-190861;R-HSA-2467813;R-HSA-6807878;R-HSA-983189;R-HSA-190840;R-HSA-1445148;R-HSA-5617833;R-HSA-437239;R-HSA-380320;R-HSA-389960;R-HSA-6811436;R-HSA-6811434;R-HSA-389977;R-HSA-2500257;R-HSA-5663220;R-HSA-2132295;R-HSA-8852276;R-HSA-5626467	19	0	No	NA	No	1	microtubule-based process [GO:0007017]	3	GTPase activity [GO:0003924];structural constituent of cytoskeleton [GO:0005200];GTP binding [GO:0005525]	3	nucleus [GO:0005634];cytoplasm [GO:0005737];microtubule [GO:0005874]
Q9BQE3	Q9BVA1	Tubulin alpha-1C chain (Alpha-tubulin 6) (Tubulin alpha-6 chain)	Tubulin beta-2B chain	0.58	1659	1478	1408	0	yes	22	22	R-HSA-68877;R-HSA-190861;R-HSA-5610787;R-HSA-2467813;R-HSA-6807878;R-HSA-983189;R-HSA-190840;R-HSA-1445148;R-HSA-5617833;R-HSA-437239;R-HSA-380320;R-HSA-389960;R-HSA-5620924;R-HSA-6811436;R-HSA-389957;R-HSA-6811434;R-HSA-389977;R-HSA-2500257;R-HSA-5663220;R-HSA-2132295;R-HSA-8852276;R-HSA-5626467	22	0	No	NF	No	1	microtubule-based process [GO:0007017]	3	GTPase activity [GO:0003924];structural constituent of cytoskeleton [GO:0005200];GTP binding [GO:0005525]	3	nucleus [GO:0005634];cytoplasm [GO:0005737];microtubule [GO:0005874]
Q71U36	Q13885	Tubulin alpha-1A chain (Alpha-tubulin 3) (Tubulin B-alpha-1) (Tubulin alpha-3 chain)	Tubulin beta-2A chain (Tubulin beta class IIa)	0.58	1654	1484	1412	0	yes	28	22	R-HSA-68877;R-HSA-5610787;R-HSA-2467813;R-HSA-6807878;R-HSA-1445148;R-HSA-437239;R-HSA-380320;R-HSA-389960;R-HSA-5620924;R-HSA-6811436;R-HSA-389957;R-HSA-6811434;R-HSA-389977;R-HSA-5663220;R-HSA-2132295;R-HSA-8852276;R-HSA-190861;R-HSA-983189;R-HSA-190840;R-HSA-5617833;R-HSA-2500257;R-HSA-5626467	22	0	No	NA	No	1	microtubule-based process [GO:0007017]	3	GTPase activity [GO:0003924];structural constituent of cytoskeleton [GO:0005200];GTP binding [GO:0005525]	3	nucleus [GO:0005634];extracellular exosome [GO:0070062];microtubule [GO:0005874]
Q9BVA1	Q71U36	Tubulin beta-2B chain	Tubulin alpha-1A chain (Alpha-tubulin 3) (Tubulin B-alpha-1) (Tubulin alpha-3 chain)	0.58	1478	1654	1406	0	no	22	28	R-HSA-68877;R-HSA-190861;R-HSA-5610787;R-HSA-2467813;R-HSA-6807878;R-HSA-983189;R-HSA-190840;R-HSA-1445148;R-HSA-5617833;R-HSA-437239;R-HSA-380320;R-HSA-389960;R-HSA-5620924;R-HSA-6811436;R-HSA-389957;R-HSA-6811434;R-HSA-389977;R-HSA-2500257;R-HSA-5663220;R-HSA-2132295;R-HSA-8852276;R-HSA-5626467	22	0	No	NF	No	1	microtubule-based process [GO:0007017]	3	GTPase activity [GO:0003924];structural constituent of cytoskeleton [GO:0005200];GTP binding [GO:0005525]	2	nucleus [GO:0005634];microtubule [GO:0005874]
Q9BQE3	Q13885	Tubulin alpha-1C chain (Alpha-tubulin 6) (Tubulin alpha-6 chain)	Tubulin beta-2A chain (Tubulin beta class IIa)	0.58	1659	1484	1414	0	yes	22	22	R-HSA-68877;R-HSA-190861;R-HSA-5610787;R-HSA-2467813;R-HSA-6807878;R-HSA-983189;R-HSA-190840;R-HSA-1445148;R-HSA-5617833;R-HSA-437239;R-HSA-380320;R-HSA-389960;R-HSA-5620924;R-HSA-6811436;R-HSA-389957;R-HSA-6811434;R-HSA-389977;R-HSA-2500257;R-HSA-5663220;R-HSA-2132295;R-HSA-8852276;R-HSA-5626467	22	0	No	NA	No	1	microtubule-based process [GO:0007017]	3	GTPase activity [GO:0003924];structural constituent of cytoskeleton [GO:0005200];GTP binding [GO:0005525]	3	nucleus [GO:0005634];cytoplasm [GO:0005737];microtubule [GO:0005874]
Q6PEY2	P04350	Tubulin alpha-3E chain (Alpha-tubulin 3E)	Tubulin beta-4A chain (Tubulin 5 beta) (Tubulin beta-4 chain)	0.58	1579	1415	1326	0	yes	19	28	R-HSA-68877;R-HSA-190861;R-HSA-2467813;R-HSA-6807878;R-HSA-983189;R-HSA-1445148;R-HSA-190840;R-HSA-5617833;R-HSA-437239;R-HSA-380320;R-HSA-389960;R-HSA-6811436;R-HSA-6811434;R-HSA-2500257;R-HSA-5663220;R-HSA-389977;R-HSA-2132295;R-HSA-8852276;R-HSA-5626467	19	0	No	NA	No	1	microtubule-based process [GO:0007017]	3	GTPase activity [GO:0003924];structural constituent of cytoskeleton [GO:0005200];GTP binding [GO:0005525]	2	nucleus [GO:0005634];microtubule [GO:0005874]
Q9BVA1	P68363	Tubulin beta-2B chain	Tubulin alpha-1B chain (Alpha-tubulin ubiquitous) (Tubulin K-alpha-1) (Tubulin alpha-ubiquitous chain)	0.57	1478	1662	1408	0	yes	22	21	R-HSA-68877;R-HSA-190861;R-HSA-5610787;R-HSA-2467813;R-HSA-6807878;R-HSA-983189;R-HSA-190840;R-HSA-1445148;R-HSA-5617833;R-HSA-437239;R-HSA-380320;R-HSA-389960;R-HSA-5620924;R-HSA-6811436;R-HSA-6811434;R-HSA-389977;R-HSA-2500257;R-HSA-5663220;R-HSA-2132295;R-HSA-8852276;R-HSA-5626467	21	0	No	NF	No	1	microtubule-based process [GO:0007017]	3	GTPase activity [GO:0003924];structural constituent of cytoskeleton [GO:0005200];GTP binding [GO:0005525]	1	microtubule [GO:0005874]
P35908	P04264	Keratin, type II cytoskeletal 2 epidermal (Cytokeratin-2e) (CK-2e) (Epithelial keratin-2e) (Keratin-2 epidermis) (Keratin-2e) (K2e) (Type-II keratin Kb2)	Keratin, type II cytoskeletal 1 (67 kDa cytokeratin) (Cytokeratin-1) (CK-1) (Hair alpha protein) (Keratin-1) (K1) (Type-II keratin Kb1)	0.57	869	1166	773	0	yes	0	0	NF	0	0	yes	NA	Yes	0	NF	0	NF	5	nucleus [GO:0005634];extracellular space [GO:0005615];keratin filament [GO:0045095];extracellular exosome [GO:0070062];membrane [GO:0016020]
P68363	Q13885	Tubulin alpha-1B chain (Alpha-tubulin ubiquitous) (Tubulin K-alpha-1) (Tubulin alpha-ubiquitous chain)	Tubulin beta-2A chain (Tubulin beta class IIa)	0.57	1662	1484	1414	0	yes	21	22	R-HSA-68877;R-HSA-190861;R-HSA-5610787;R-HSA-2467813;R-HSA-6807878;R-HSA-983189;R-HSA-190840;R-HSA-1445148;R-HSA-5617833;R-HSA-437239;R-HSA-380320;R-HSA-389960;R-HSA-5620924;R-HSA-6811436;R-HSA-6811434;R-HSA-2500257;R-HSA-5663220;R-HSA-389977;R-HSA-2132295;R-HSA-8852276;R-HSA-5626467	21	0	No	NA	No	1	microtubule-based process [GO:0007017]	3	GTPase activity [GO:0003924];structural constituent of cytoskeleton [GO:0005200];GTP binding [GO:0005525]	2	extracellular exosome [GO:0070062];microtubule [GO:0005874]
P31513	P05177	Dimethylaniline monooxygenase [N-oxide-forming] 3 (EC 1.14.13.8) (Dimethylaniline oxidase 3) (FMO II) (FMO form 2) (Hepatic flavin-containing monooxygenase 3) (FMO 3) (Trimethylamine monooxygenase) (EC 1.14.13.148)	Cytochrome P450 1A2 (EC 1.14.14.1) (CYPIA2) (Cholesterol 25-hydroxylase) (Cytochrome P(3)450) (Cytochrome P450 4) (Cytochrome P450-P3)	0.57	67	54	46	0	no	2	5	NF	0	0	No	NA	No	3	oxidation-reduction process [GO:0055114];drug metabolic process [GO:0017144];xenobiotic metabolic process [GO:0006805]	1	monooxygenase activity [GO:0004497]	3	organelle membrane [GO:0031090];intracellular membrane-bounded organelle [GO:0043231];endoplasmic reticulum membrane [GO:0005789]
P02042	P69905	Hemoglobin subunit delta (Delta-globin) (Hemoglobin delta chain)	Hemoglobin subunit alpha (Alpha-globin) (Hemoglobin alpha chain)	0.57	1252	1227	1118	0	no	1	3	NF	0	0	yes	NA	Yes	0	NF	4	heme binding [GO:0020037];iron ion binding [GO:0005506];oxygen binding [GO:0019825];oxygen transporter activity [GO:0005344]	3	hemoglobin complex [GO:0005833];cytosol [GO:0005829];blood microparticle [GO:0072562]
P05181	P05177	Cytochrome P450 2E1 (EC 1.14.13.-) (4-nitrophenol 2-hydroxylase) (EC 1.14.13.n7) (CYPIIE1) (Cytochrome P450-J) [Cleaved into: Cytochrome P450 2E1, N-terminally processed]	Cytochrome P450 1A2 (EC 1.14.14.1) (CYPIA2) (Cholesterol 25-hydroxylase) (Cytochrome P(3)450) (Cytochrome P450 4) (Cytochrome P450-P3)	0.56	57	54	47	0	no	2	5	NF	0	0	No	NA	No	6	oxidation-reduction process [GO:0055114];monoterpenoid metabolic process [GO:0016098];xenobiotic metabolic process [GO:0006805];heterocycle metabolic process [GO:0046483];epoxygenase P450 pathway [GO:0019373];drug metabolic process [GO:0017144]	7	oxidoreductase activity, acting on paired donors, with incorporation or reduction of molecular oxygen, reduced flavin or flavoprotein as one donor, and incorporation of one atom of oxygen [GO:0016712];enzyme binding [GO:0019899];heme binding [GO:0020037];iron ion binding [GO:0005506];monooxygenase activity [GO:0004497];oxidoreductase activity [GO:0016491];oxygen binding [GO:0019825]	1	endoplasmic reticulum membrane [GO:0005789]
P04350	Q9NY65	Tubulin beta-4A chain (Tubulin 5 beta) (Tubulin beta-4 chain)	Tubulin alpha-8 chain (Alpha-tubulin 8) (Tubulin alpha chain-like 2)	0.56	1415	1528	1282	0	no	28	19	R-HSA-68877;R-HSA-2467813;R-HSA-6807878;R-HSA-1445148;R-HSA-437239;R-HSA-380320;R-HSA-389960;R-HSA-6811436;R-HSA-6811434;R-HSA-389977;R-HSA-5663220;R-HSA-2132295;R-HSA-8852276;R-HSA-190861;R-HSA-983189;R-HSA-190840;R-HSA-5617833;R-HSA-2500257;R-HSA-5626467	19	0	No	NA	No	1	microtubule-based process [GO:0007017]	3	GTPase activity [GO:0003924];structural constituent of cytoskeleton [GO:0005200];GTP binding [GO:0005525]	1	microtubule [GO:0005874]
Q9BVA1	Q9NY65	Tubulin beta-2B chain	Tubulin alpha-8 chain (Alpha-tubulin 8) (Tubulin alpha chain-like 2)	0.56	1478	1528	1328	0	no	22	19	R-HSA-68877;R-HSA-190861;R-HSA-2467813;R-HSA-6807878;R-HSA-983189;R-HSA-190840;R-HSA-1445148;R-HSA-5617833;R-HSA-437239;R-HSA-380320;R-HSA-389960;R-HSA-6811436;R-HSA-6811434;R-HSA-389977;R-HSA-2500257;R-HSA-5663220;R-HSA-2132295;R-HSA-8852276;R-HSA-5626467	19	0	No	NA	No	1	microtubule-based process [GO:0007017]	3	GTPase activity [GO:0003924];structural constituent of cytoskeleton [GO:0005200];GTP binding [GO:0005525]	2	cytoplasm [GO:0005737];microtubule [GO:0005874]
P78386	O43790	Keratin, type II cuticular Hb5 (Hair keratin K2.12) (Keratin-85) (K85) (Type II hair keratin Hb5) (Type-II keratin Kb25)	Keratin, type II cuticular Hb6 (Hair keratin K2.11) (Keratin-86) (K86) (Type II hair keratin Hb6) (Type-II keratin Kb26)	0.56	19	21	15	0	no	0	0	NF	0	0	yes	NA	Yes	0	NF	1	structural molecule activity [GO:0005198]	2	extracellular space [GO:0005615];keratin filament [GO:0045095]
Q13885	Q9NY65	Tubulin beta-2A chain (Tubulin beta class IIa)	Tubulin alpha-8 chain (Alpha-tubulin 8) (Tubulin alpha chain-like 2)	0.56	1484	1528	1332	0	no	22	19	R-HSA-68877;R-HSA-190861;R-HSA-2467813;R-HSA-6807878;R-HSA-983189;R-HSA-190840;R-HSA-1445148;R-HSA-5617833;R-HSA-437239;R-HSA-380320;R-HSA-389960;R-HSA-6811436;R-HSA-6811434;R-HSA-389977;R-HSA-2500257;R-HSA-5663220;R-HSA-2132295;R-HSA-8852276;R-HSA-5626467	19	0	No	NA	No	1	microtubule-based process [GO:0007017]	3	GTPase activity [GO:0003924];structural constituent of cytoskeleton [GO:0005200];GTP binding [GO:0005525]	2	cytoplasm [GO:0005737];microtubule [GO:0005874]
Q13509	Q6PEY2	Tubulin beta-3 chain (Tubulin beta-4 chain) (Tubulin beta-III)	Tubulin alpha-3E chain (Alpha-tubulin 3E)	0.56	1390	1579	1301	0	no	22	19	R-HSA-68877;R-HSA-190861;R-HSA-2467813;R-HSA-6807878;R-HSA-983189;R-HSA-190840;R-HSA-1445148;R-HSA-5617833;R-HSA-437239;R-HSA-380320;R-HSA-389960;R-HSA-6811436;R-HSA-6811434;R-HSA-389977;R-HSA-2500257;R-HSA-5663220;R-HSA-2132295;R-HSA-8852276;R-HSA-5626467	19	0	No	NA	No	1	microtubule-based process [GO:0007017]	3	GTPase activity [GO:0003924];structural constituent of cytoskeleton [GO:0005200];GTP binding [GO:0005525]	3	nucleus [GO:0005634];cytoplasm [GO:0005737];microtubule [GO:0005874]
Q13509	P68366	Tubulin beta-3 chain (Tubulin beta-4 chain) (Tubulin beta-III)	Tubulin alpha-4A chain (Alpha-tubulin 1) (Testis-specific alpha-tubulin) (Tubulin H2-alpha) (Tubulin alpha-1 chain)	0.56	1390	1599	1315	0	yes	22	29	R-HSA-68877;R-HSA-190861;R-HSA-5610787;R-HSA-2467813;R-HSA-6807878;R-HSA-983189;R-HSA-190840;R-HSA-1445148;R-HSA-5617833;R-HSA-437239;R-HSA-380320;R-HSA-389960;R-HSA-5620924;R-HSA-6811436;R-HSA-389957;R-HSA-6811434;R-HSA-389977;R-HSA-2500257;R-HSA-5663220;R-HSA-2132295;R-HSA-8852276;R-HSA-5626467	22	0	No	NA	No	1	microtubule-based process [GO:0007017]	3	GTPase activity [GO:0003924];structural constituent of cytoskeleton [GO:0005200];GTP binding [GO:0005525]	2	extracellular exosome [GO:0070062];microtubule [GO:0005874]
P31513	P11712	Dimethylaniline monooxygenase [N-oxide-forming] 3 (EC 1.14.13.8) (Dimethylaniline oxidase 3) (FMO II) (FMO form 2) (Hepatic flavin-containing monooxygenase 3) (FMO 3) (Trimethylamine monooxygenase) (EC 1.14.13.148)	Cytochrome P450 2C9 (EC 1.14.13.-) ((R)-limonene 6-monooxygenase) (EC 1.14.13.80) ((S)-limonene 6-monooxygenase) (EC 1.14.13.48) ((S)-limonene 7-monooxygenase) (EC 1.14.13.49) (CYPIIC9) (Cholesterol 25-hydroxylase) (EC 1.14.99.38) (Cytochrome P-450MP) (Cytochrome P450 MP-4) (Cytochrome P450 MP-8) (Cytochrome P450 PB-1) (S-mephenytoin 4-hydroxylase)	0.56	67	60	50	0	no	2	4	NF	0	0	No	NA	No	3	oxidation-reduction process [GO:0055114];drug metabolic process [GO:0017144];xenobiotic metabolic process [GO:0006805]	1	monooxygenase activity [GO:0004497]	3	organelle membrane [GO:0031090];intracellular membrane-bounded organelle [GO:0043231];endoplasmic reticulum membrane [GO:0005789]
P48668	P02533	Keratin, type II cytoskeletal 6C (Cytokeratin-6C) (CK-6C) (Cytokeratin-6E) (CK-6E) (Keratin K6h) (Keratin-6C) (K6C) (Type-II keratin Kb12)	Keratin, type I cytoskeletal 14 (Cytokeratin-14) (CK-14) (Keratin-14) (K14)	0.55	916	707	600	0	no	0	1	NF	0	0	No	NA	No	0	NF	0	NF	3	intermediate filament [GO:0005882];keratin filament [GO:0045095];extracellular exosome [GO:0070062]
Q14204	Q01082	Cytoplasmic dynein 1 heavy chain 1 (Cytoplasmic dynein heavy chain 1) (Dynein heavy chain, cytosolic)	Spectrin beta chain, non-erythrocytic 1 (Beta-II spectrin) (Fodrin beta chain) (Spectrin, non-erythroid beta chain 1)	0.55	1154	1259	1038	0	no	9	5	R-HSA-6807878	1	0	No	NA	No	1	ER to Golgi vesicle-mediated transport [GO:0006888]	1	poly(A) RNA binding [GO:0044822]	2	cytosol [GO:0005829];extracellular exosome [GO:0070062]
P68371	Q9NY65	Tubulin beta-4B chain (Tubulin beta-2 chain) (Tubulin beta-2C chain)	Tubulin alpha-8 chain (Alpha-tubulin 8) (Tubulin alpha chain-like 2)	0.55	1553	1528	1386	0	no	28	19	R-HSA-68877;R-HSA-2467813;R-HSA-6807878;R-HSA-1445148;R-HSA-437239;R-HSA-380320;R-HSA-389960;R-HSA-6811436;R-HSA-6811434;R-HSA-389977;R-HSA-5663220;R-HSA-2132295;R-HSA-8852276;R-HSA-190861;R-HSA-983189;R-HSA-190840;R-HSA-5617833;R-HSA-2500257;R-HSA-5626467	19	0	No	NA	No	1	microtubule-based process [GO:0007017]	3	GTPase activity [GO:0003924];structural constituent of cytoskeleton [GO:0005200];GTP binding [GO:0005525]	1	microtubule [GO:0005874]
Q13509	Q13748	Tubulin beta-3 chain (Tubulin beta-4 chain) (Tubulin beta-III)	Tubulin alpha-3C/D chain (Alpha-tubulin 2) (Alpha-tubulin 3C/D) (Tubulin alpha-2 chain)	0.55	1390	1599	1316	0	no	22	22	R-HSA-68877;R-HSA-190861;R-HSA-5610787;R-HSA-2467813;R-HSA-6807878;R-HSA-983189;R-HSA-190840;R-HSA-1445148;R-HSA-5617833;R-HSA-437239;R-HSA-380320;R-HSA-389960;R-HSA-5620924;R-HSA-6811436;R-HSA-389957;R-HSA-6811434;R-HSA-389977;R-HSA-2500257;R-HSA-5663220;R-HSA-2132295;R-HSA-8852276;R-HSA-5626467	22	0	No	NA	No	1	microtubule-based process [GO:0007017]	3	GTPase activity [GO:0003924];structural constituent of cytoskeleton [GO:0005200];GTP binding [GO:0005525]	3	nucleus [GO:0005634];cytoplasm [GO:0005737];microtubule [GO:0005874]
P55268	P11047	Laminin subunit beta-2 (Laminin B1s chain) (Laminin-11 subunit beta) (Laminin-14 subunit beta) (Laminin-15 subunit beta) (Laminin-3 subunit beta) (Laminin-4 subunit beta) (Laminin-7 subunit beta) (Laminin-9 subunit beta) (S-laminin subunit beta) (S-LAM beta)	Laminin subunit gamma-1 (Laminin B2 chain) (Laminin-1 subunit gamma) (Laminin-10 subunit gamma) (Laminin-11 subunit gamma) (Laminin-2 subunit gamma) (Laminin-3 subunit gamma) (Laminin-4 subunit gamma) (Laminin-6 subunit gamma) (Laminin-7 subunit gamma) (Laminin-8 subunit gamma) (Laminin-9 subunit gamma) (S-laminin subunit gamma) (S-LAM gamma)	0.55	712	767	581	0	no	3	5	R-HSA-3000157;R-HSA-3000178;R-HSA-3000171	3	0	yes	2319_ITGA6-ITGB4-Laminin10/12 complex	No	2	extracellular matrix organization [GO:0030198];cell adhesion [GO:0007155]	0	NF	4	extracellular region [GO:0005576];basement membrane [GO:0005604];extracellular exosome [GO:0070062];laminin-11 complex [GO:0043260]
Q13509	Q9NY65	Tubulin beta-3 chain (Tubulin beta-4 chain) (Tubulin beta-III)	Tubulin alpha-8 chain (Alpha-tubulin 8) (Tubulin alpha chain-like 2)	0.55	1390	1528	1261	0	no	22	19	R-HSA-68877;R-HSA-190861;R-HSA-2467813;R-HSA-6807878;R-HSA-983189;R-HSA-190840;R-HSA-1445148;R-HSA-5617833;R-HSA-437239;R-HSA-380320;R-HSA-389960;R-HSA-6811436;R-HSA-6811434;R-HSA-389977;R-HSA-2500257;R-HSA-5663220;R-HSA-2132295;R-HSA-8852276;R-HSA-5626467	19	0	No	NA	No	1	microtubule-based process [GO:0007017]	3	GTPase activity [GO:0003924];structural constituent of cytoskeleton [GO:0005200];GTP binding [GO:0005525]	2	cytoplasm [GO:0005737];microtubule [GO:0005874]
P12109	P12110	Collagen alpha-1(VI) chain	Collagen alpha-2(VI) chain	0.55	960	818	730	0	NA	7	7	R-HSA-186797;R-HSA-419037;R-HSA-1442490;R-HSA-3000178;R-HSA-216083;R-HSA-1650814;R-HSA-2022090	7	0	yes	NA	No	4	protein heterotrimerization [GO:0070208];extracellular matrix organization [GO:0030198];collagen catabolic process [GO:0030574];cell adhesion [GO:0007155]	0	NF	6	endoplasmic reticulum lumen [GO:0005788];extracellular matrix [GO:0031012];extracellular exosome [GO:0070062];sarcolemma [GO:0042383];protein complex [GO:0043234];extracellular region [GO:0005576]
P02533	P02538	Keratin, type I cytoskeletal 14 (Cytokeratin-14) (CK-14) (Keratin-14) (K14)	Keratin, type II cytoskeletal 6A (Cytokeratin-6A) (CK-6A) (Cytokeratin-6D) (CK-6D) (Keratin-6A) (K6A) (Type-II keratin Kb6) (allergen Hom s 5)	0.55	707	918	599	0	no	1	0	NF	0	0	No	NA	No	0	NF	1	structural constituent of cytoskeleton [GO:0005200]	3	nucleus [GO:0005634];keratin filament [GO:0045095];extracellular exosome [GO:0070062]
P78386	Q14533	Keratin, type II cuticular Hb5 (Hair keratin K2.12) (Keratin-85) (K85) (Type II hair keratin Hb5) (Type-II keratin Kb25)	Keratin, type II cuticular Hb1 (Hair keratin K2.9) (Keratin, hair, basic, 1) (Keratin-81) (K81) (Metastatic lymph node 137 gene protein) (MLN 137) (Type II hair keratin Hb1) (Type-II keratin Kb21) (ghHKb1) (ghHb1)	0.54	19	22	15	0	no	0	0	NF	0	0	yes	NA	Yes	0	NF	1	structural molecule activity [GO:0005198]	2	extracellular space [GO:0005615];keratin filament [GO:0045095]
P04350	Q71U36	Tubulin beta-4A chain (Tubulin 5 beta) (Tubulin beta-4 chain)	Tubulin alpha-1A chain (Alpha-tubulin 3) (Tubulin B-alpha-1) (Tubulin alpha-3 chain)	0.54	1415	1654	1364	0	no	28	28	R-HSA-68877;R-HSA-5610787;R-HSA-2467813;R-HSA-6807878;R-HSA-1445148;R-HSA-437239;R-HSA-380320;R-HSA-389960;R-HSA-2565942;R-HSA-5620924;R-HSA-6811436;R-HSA-389957;R-HSA-6811434;R-HSA-389977;R-HSA-5663220;R-HSA-380259;R-HSA-2132295;R-HSA-8852276;R-HSA-380270;R-HSA-190861;R-HSA-983189;R-HSA-190840;R-HSA-5617833;R-HSA-5620912;R-HSA-380284;R-HSA-2500257;R-HSA-5626467;R-HSA-8854518	28	0	No	NA	No	2	G2/M transition of mitotic cell cycle [GO:0000086];microtubule-based process [GO:0007017]	3	GTPase activity [GO:0003924];structural constituent of cytoskeleton [GO:0005200];GTP binding [GO:0005525]	5	myelin sheath [GO:0043209];microtubule [GO:0005874];nucleus [GO:0005634];cytosol [GO:0005829];extracellular exosome [GO:0070062]
Q7Z3Y8	Q01546	Keratin, type I cytoskeletal 27 (Cytokeratin-27) (CK-27) (Keratin-25C) (K25C) (Keratin-27) (K27) (Type I inner root sheath-specific keratin-K25irs3)	Keratin, type II cytoskeletal 2 oral (Cytokeratin-2P) (CK-2P) (K2P) (Keratin-76) (K76) (Type-II keratin Kb9)	0.54	556	689	448	0	no	0	0	NF	0	0	No	NA	No	0	NF	1	structural molecule activity [GO:0005198]	2	intermediate filament [GO:0005882];extracellular exosome [GO:0070062]
P10632	P11509	Cytochrome P450 2C8 (EC 1.14.14.1) (CYPIIC8) (Cytochrome P450 IIC2) (Cytochrome P450 MP-12) (Cytochrome P450 MP-20) (Cytochrome P450 form 1) (S-mephenytoin 4-hydroxylase)	Cytochrome P450 2A6 (EC 1.14.13.-) (1,4-cineole 2-exo-monooxygenase) (CYPIIA6) (Coumarin 7-hydroxylase) (Cytochrome P450 IIA3) (Cytochrome P450(I))	0.53	54	58	48	0	NA	4	2	R-HSA-211981;R-HSA-211999	2	0	yes	NA	No	3	exogenous drug catabolic process [GO:0042738];drug metabolic process [GO:0017144];epoxygenase P450 pathway [GO:0019373]	4	heme binding [GO:0020037];steroid hydroxylase activity [GO:0008395];iron ion binding [GO:0005506];arachidonic acid epoxygenase activity [GO:0008392]	2	organelle membrane [GO:0031090];endoplasmic reticulum membrane [GO:0005789]
Q9BQE3	P04350	Tubulin alpha-1C chain (Alpha-tubulin 6) (Tubulin alpha-6 chain)	Tubulin beta-4A chain (Tubulin 5 beta) (Tubulin beta-4 chain)	0.53	1659	1415	1367	0	yes	22	28	R-HSA-68877;R-HSA-190861;R-HSA-5610787;R-HSA-2467813;R-HSA-6807878;R-HSA-983189;R-HSA-190840;R-HSA-1445148;R-HSA-5617833;R-HSA-437239;R-HSA-380320;R-HSA-389960;R-HSA-5620924;R-HSA-6811436;R-HSA-389957;R-HSA-6811434;R-HSA-389977;R-HSA-2500257;R-HSA-5663220;R-HSA-2132295;R-HSA-8852276;R-HSA-5626467	22	0	No	NA	No	1	microtubule-based process [GO:0007017]	3	GTPase activity [GO:0003924];structural constituent of cytoskeleton [GO:0005200];GTP binding [GO:0005525]	2	nucleus [GO:0005634];microtubule [GO:0005874]
Q9Y490	P35579	Talin-1	Myosin-9 (Cellular myosin heavy chain, type A) (Myosin heavy chain 9) (Myosin heavy chain, non-muscle IIa) (Non-muscle myosin heavy chain A) (NMMHC-A) (Non-muscle myosin heavy chain IIa) (NMMHC II-a) (NMMHC-IIA)	0.53	1427	1582	1371	0	no	8	7	NF	0	0	No	NF	No	1	platelet aggregation [GO:0070527]	1	cadherin binding involved in cell-cell adhesion [GO:0098641]	7	cell-cell adherens junction [GO:0005913];cytosol [GO:0005829];cytoplasm [GO:0005737];focal adhesion [GO:0005925];ruffle [GO:0001726];plasma membrane [GO:0005886];extracellular exosome [GO:0070062]
P68363	P04350	Tubulin alpha-1B chain (Alpha-tubulin ubiquitous) (Tubulin K-alpha-1) (Tubulin alpha-ubiquitous chain)	Tubulin beta-4A chain (Tubulin 5 beta) (Tubulin beta-4 chain)	0.53	1662	1415	1367	0	no	21	28	R-HSA-68877;R-HSA-190861;R-HSA-5610787;R-HSA-2467813;R-HSA-6807878;R-HSA-983189;R-HSA-190840;R-HSA-1445148;R-HSA-5617833;R-HSA-437239;R-HSA-380320;R-HSA-389960;R-HSA-5620924;R-HSA-6811436;R-HSA-6811434;R-HSA-2500257;R-HSA-5663220;R-HSA-389977;R-HSA-2132295;R-HSA-8852276;R-HSA-5626467	21	0	No	NA	No	1	microtubule-based process [GO:0007017]	3	GTPase activity [GO:0003924];structural constituent of cytoskeleton [GO:0005200];GTP binding [GO:0005525]	3	myelin sheath [GO:0043209];extracellular exosome [GO:0070062];microtubule [GO:0005874]
P19099	P08686	Cytochrome P450 11B2, mitochondrial (Aldosterone synthase) (ALDOS) (EC 1.14.15.4) (EC 1.14.15.5) (Aldosterone-synthesizing enzyme) (CYPXIB2) (Cytochrome P-450Aldo) (Cytochrome P-450C18) (Steroid 18-hydroxylase)	Steroid 21-hydroxylase (EC 1.14.14.16) (21-OHase) (Cytochrome P-450c21) (Cytochrome P450 21) (Cytochrome P450 XXI) (Cytochrome P450-C21) (Cytochrome P450-C21B)	0.53	42	43	39	0	NA	4	4	R-HSA-193993;R-HSA-194002;R-HSA-211976	3	0	No	NA	No	2	mineralocorticoid biosynthetic process [GO:0006705];sterol metabolic process [GO:0016125]	3	heme binding [GO:0020037];iron ion binding [GO:0005506];steroid hydroxylase activity [GO:0008395]	0	NF
P04259	P02533	Keratin, type II cytoskeletal 6B (Cytokeratin-6B) (CK-6B) (Keratin-6B) (K6B) (Type-II keratin Kb10)	Keratin, type I cytoskeletal 14 (Cytokeratin-14) (CK-14) (Keratin-14) (K14)	0.53	975	707	615	0	no	0	1	NF	0	0	No	NA	No	0	NF	1	structural constituent of cytoskeleton [GO:0005200]	2	keratin filament [GO:0045095];extracellular exosome [GO:0070062]
P20853	P10632	Cytochrome P450 2A7 (EC 1.14.14.1) (CYPIIA7) (Cytochrome P450 IIA4)	Cytochrome P450 2C8 (EC 1.14.14.1) (CYPIIC8) (Cytochrome P450 IIC2) (Cytochrome P450 MP-12) (Cytochrome P450 MP-20) (Cytochrome P450 form 1) (S-mephenytoin 4-hydroxylase)	0.53	47	54	41	0	no	3	4	R-HSA-211981;R-HSA-211999	2	0	yes	NA	No	1	epoxygenase P450 pathway [GO:0019373]	6	oxygen binding [GO:0019825];arachidonic acid epoxygenase activity [GO:0008392];heme binding [GO:0020037];iron ion binding [GO:0005506];aromatase activity [GO:0070330];steroid hydroxylase activity [GO:0008395]	2	organelle membrane [GO:0031090];endoplasmic reticulum membrane [GO:0005789]
P02452	P08123	Collagen alpha-1(I) chain (Alpha-1 type I collagen)	Collagen alpha-2(I) chain (Alpha-2 type I collagen)	0.53	642	736	526	0	NA	15	15	R-HSA-75892;R-HSA-1442490;R-HSA-2214320;R-HSA-1474244;R-HSA-3000171;R-HSA-2022090;R-HSA-202733;R-HSA-3000170;R-HSA-2243919;R-HSA-3000178;R-HSA-114604;R-HSA-216083;R-HSA-1650814;R-HSA-198933;R-HSA-3000480	15	0	yes	NA	No	12	regulation of immune response [GO:0050776];extracellular matrix organization [GO:0030198];blood vessel development [GO:0001568];skeletal system development [GO:0001501];cellular response to amino acid stimulus [GO:0071230];skin morphogenesis [GO:0043589];platelet activation [GO:0030168];protein heterotrimerization [GO:0070208];blood coagulation [GO:0007596];collagen catabolic process [GO:0030574]…	4	metal ion binding [GO:0046872];identical protein binding [GO:0042802];platelet-derived growth factor binding [GO:0048407];extracellular matrix structural constituent [GO:0005201]	5	endoplasmic reticulum lumen [GO:0005788];extracellular region [GO:0005576];extracellular matrix [GO:0031012];extracellular space [GO:0005615];collagen type I trimer [GO:0005584]
P55268	O15230	Laminin subunit beta-2 (Laminin B1s chain) (Laminin-11 subunit beta) (Laminin-14 subunit beta) (Laminin-15 subunit beta) (Laminin-3 subunit beta) (Laminin-4 subunit beta) (Laminin-7 subunit beta) (Laminin-9 subunit beta) (S-laminin subunit beta) (S-LAM beta)	Laminin subunit alpha-5 (Laminin-10 subunit alpha) (Laminin-11 subunit alpha) (Laminin-15 subunit alpha)	0.53	712	709	573	0	no	3	4	R-HSA-3000157;R-HSA-3000178;R-HSA-3000171	3	0	yes	2319_ITGA6-ITGB4-Laminin10/12 complex	No	1	extracellular matrix organization [GO:0030198]	1	structural molecule activity [GO:0005198]	5	extracellular region [GO:0005576];basement membrane [GO:0005604];basal lamina [GO:0005605];extracellular exosome [GO:0070062];laminin-11 complex [GO:0043260]
P05181	P31513	Cytochrome P450 2E1 (EC 1.14.13.-) (4-nitrophenol 2-hydroxylase) (EC 1.14.13.n7) (CYPIIE1) (Cytochrome P450-J) [Cleaved into: Cytochrome P450 2E1, N-terminally processed]	Dimethylaniline monooxygenase [N-oxide-forming] 3 (EC 1.14.13.8) (Dimethylaniline oxidase 3) (FMO II) (FMO form 2) (Hepatic flavin-containing monooxygenase 3) (FMO 3) (Trimethylamine monooxygenase) (EC 1.14.13.148)	0.52	57	67	48	0	no	2	2	NF	0	0	No	NA	No	3	oxidation-reduction process [GO:0055114];drug metabolic process [GO:0017144];xenobiotic metabolic process [GO:0006805]	1	monooxygenase activity [GO:0004497]	1	endoplasmic reticulum membrane [GO:0005789]
O76009	Q14533	Keratin, type I cuticular Ha3-I (Hair keratin, type I Ha3-I) (Keratin-33A) (K33A)	Keratin, type II cuticular Hb1 (Hair keratin K2.9) (Keratin, hair, basic, 1) (Keratin-81) (K81) (Metastatic lymph node 137 gene protein) (MLN 137) (Type II hair keratin Hb1) (Type-II keratin Kb21) (ghHKb1) (ghHb1)	0.52	29	74	17	0	no	0	0	NF	0	0	No	NA	Yes	1		1	structural molecule activity [GO:0005198]	1	extracellular space [GO:0005615]
P11509	P05177	Cytochrome P450 2A6 (EC 1.14.13.-) (1,4-cineole 2-exo-monooxygenase) (CYPIIA6) (Coumarin 7-hydroxylase) (Cytochrome P450 IIA3) (Cytochrome P450(I))	Cytochrome P450 1A2 (EC 1.14.14.1) (CYPIA2) (Cholesterol 25-hydroxylase) (Cytochrome P(3)450) (Cytochrome P450 4) (Cytochrome P450-P3)	0.52	58	54	45	0	NA	2	5	NF	0	0	No	NA	No	3	exogenous drug catabolic process [GO:0042738];drug metabolic process [GO:0017144];epoxygenase P450 pathway [GO:0019373]	4	heme binding [GO:0020037];iron ion binding [GO:0005506];oxidoreductase activity, acting on paired donors, with incorporation or reduction of molecular oxygen, reduced flavin or flavoprotein as one donor, and incorporation of one atom of oxygen [GO:0016712];enzyme binding [GO:0019899]	2	organelle membrane [GO:0031090];endoplasmic reticulum membrane [GO:0005789]
P07437	Q9NY65	Tubulin beta chain (Tubulin beta-5 chain)	Tubulin alpha-8 chain (Alpha-tubulin 8) (Tubulin alpha chain-like 2)	0.52	1570	1528	1399	0	no	6	19	NF	0	0	No	NA	No	1	microtubule-based process [GO:0007017]	3	GTPase activity [GO:0003924];structural constituent of cytoskeleton [GO:0005200];GTP binding [GO:0005525]	1	microtubule [GO:0005874]
O76009	O43790	Keratin, type I cuticular Ha3-I (Hair keratin, type I Ha3-I) (Keratin-33A) (K33A)	Keratin, type II cuticular Hb6 (Hair keratin K2.11) (Keratin-86) (K86) (Type II hair keratin Hb6) (Type-II keratin Kb26)	0.52	29	73	17	0	no	0	0	NF	0	0	No	NA	Yes	1		1	structural molecule activity [GO:0005198]	1	extracellular space [GO:0005615]
P78386	P78385	Keratin, type II cuticular Hb5 (Hair keratin K2.12) (Keratin-85) (K85) (Type II hair keratin Hb5) (Type-II keratin Kb25)	Keratin, type II cuticular Hb3 (Hair keratin K2.10) (Keratin-83) (K83) (Type II hair keratin Hb3) (Type-II keratin Kb23)	0.52	16	20	13	0	no	0	0	NF	0	0	yes	NA	Yes	1	epidermis development [GO:0008544]	1	structural molecule activity [GO:0005198]	2	extracellular space [GO:0005615];keratin filament [GO:0045095]
P08319	P21549	Alcohol dehydrogenase 4 (EC 1.1.1.1) (Alcohol dehydrogenase class II pi chain)	Serine--pyruvate aminotransferase (SPT) (EC 2.6.1.51) (Alanine--glyoxylate aminotransferase) (AGT) (EC 2.6.1.44)	0.52	128	127	80	0	no	2	1	NF	0	0	No	NA	No	0	NF	0	NF	0	NF
P05181	Q16696	Cytochrome P450 2E1 (EC 1.14.13.-) (4-nitrophenol 2-hydroxylase) (EC 1.14.13.n7) (CYPIIE1) (Cytochrome P450-J) [Cleaved into: Cytochrome P450 2E1, N-terminally processed]	Cytochrome P450 2A13 (EC 1.14.14.1) (CYPIIA13)	0.51	57	58	46	0	no	2	4	R-HSA-211981;R-HSA-211999	2	0	yes	NA	No	2	xenobiotic metabolic process [GO:0006805];epoxygenase P450 pathway [GO:0019373]	5	heme binding [GO:0020037];steroid hydroxylase activity [GO:0008395];iron ion binding [GO:0005506];oxygen binding [GO:0019825];arachidonic acid epoxygenase activity [GO:0008392]	1	endoplasmic reticulum membrane [GO:0005789]
P0CG39	Q562R1	POTE ankyrin domain family member J	Beta-actin-like protein 2 (Kappa-actin)	0.51	1496	1584	1355	0	no	0	0	NF	0	0	No	NA	No	0	NF	0	NF	2	extracellular space [GO:0005615];extracellular exosome [GO:0070062]
Q6PEY2	Q5VTE0	Tubulin alpha-3E chain (Alpha-tubulin 3E)	Putative elongation factor 1-alpha-like 3 (EF-1-alpha-like 3) (Eukaryotic elongation factor 1 A-like 3) (eEF1A-like 3) (Eukaryotic translation elongation factor 1 alpha-1 pseudogene 5)	0.51	1579	1465	1354	0	no	19	1	NF	0	NA	NA	NA	No	0	NF	2	GTPase activity [GO:0003924];GTP binding [GO:0005525]	2	nucleus [GO:0005634];cytoplasm [GO:0005737]
P04350	Q13885	Tubulin beta-4A chain (Tubulin 5 beta) (Tubulin beta-4 chain)	Tubulin beta-2A chain (Tubulin beta class IIa)	0.51	1112	1243	915	0	no	28	22	R-HSA-68877;R-HSA-5610787;R-HSA-2467813;R-HSA-6807878;R-HSA-1445148;R-HSA-437239;R-HSA-380320;R-HSA-389960;R-HSA-5620924;R-HSA-6811436;R-HSA-389957;R-HSA-6811434;R-HSA-389977;R-HSA-5663220;R-HSA-2132295;R-HSA-8852276;R-HSA-190861;R-HSA-983189;R-HSA-190840;R-HSA-5617833;R-HSA-2500257;R-HSA-5626467	22	0	yes	NA	No	1	microtubule-based process [GO:0007017]	3	GTPase activity [GO:0003924];structural constituent of cytoskeleton [GO:0005200];GTP binding [GO:0005525]	3	nucleus [GO:0005634];extracellular exosome [GO:0070062];microtubule [GO:0005874]
P05181	P10632	Cytochrome P450 2E1 (EC 1.14.13.-) (4-nitrophenol 2-hydroxylase) (EC 1.14.13.n7) (CYPIIE1) (Cytochrome P450-J) [Cleaved into: Cytochrome P450 2E1, N-terminally processed]	Cytochrome P450 2C8 (EC 1.14.14.1) (CYPIIC8) (Cytochrome P450 IIC2) (Cytochrome P450 MP-12) (Cytochrome P450 MP-20) (Cytochrome P450 form 1) (S-mephenytoin 4-hydroxylase)	0.51	55	54	44	0	no	2	4	R-HSA-211981;R-HSA-211999	2	0	yes	NA	No	4	oxidation-reduction process [GO:0055114];xenobiotic metabolic process [GO:0006805];drug metabolic process [GO:0017144];epoxygenase P450 pathway [GO:0019373]	6	oxygen binding [GO:0019825];arachidonic acid epoxygenase activity [GO:0008392];heme binding [GO:0020037];iron ion binding [GO:0005506];monooxygenase activity [GO:0004497];steroid hydroxylase activity [GO:0008395]	1	endoplasmic reticulum membrane [GO:0005789]
P13647	P02533	Keratin, type II cytoskeletal 5 (58 kDa cytokeratin) (Cytokeratin-5) (CK-5) (Keratin-5) (K5) (Type-II keratin Kb5)	Keratin, type I cytoskeletal 14 (Cytokeratin-14) (CK-14) (Keratin-14) (K14)	0.51	897	707	597	1	yes	1	1	R-HSA-446107	1	0	No	NA	No	2	hemidesmosome assembly [GO:0031581];epidermis development [GO:0008544]	1	structural constituent of cytoskeleton [GO:0005200]	6	cytosol [GO:0005829];cytoplasm [GO:0005737];keratin filament [GO:0045095];intermediate filament [GO:0005882];nucleus [GO:0005634];extracellular exosome [GO:0070062]
Q14204	Q13813	Cytoplasmic dynein 1 heavy chain 1 (Cytoplasmic dynein heavy chain 1) (Dynein heavy chain, cytosolic)	Spectrin alpha chain, non-erythrocytic 1 (Alpha-II spectrin) (Fodrin alpha chain) (Spectrin, non-erythroid alpha subunit)	0.51	1154	1227	1017	0	NA	9	6	R-HSA-6807878	1	0	No	NF	No	1	ER to Golgi vesicle-mediated transport [GO:0006888]	0	NF	3	membrane [GO:0016020];cytosol [GO:0005829];extracellular exosome [GO:0070062]
P11047	O15230	Laminin subunit gamma-1 (Laminin B2 chain) (Laminin-1 subunit gamma) (Laminin-10 subunit gamma) (Laminin-11 subunit gamma) (Laminin-2 subunit gamma) (Laminin-3 subunit gamma) (Laminin-4 subunit gamma) (Laminin-6 subunit gamma) (Laminin-7 subunit gamma) (Laminin-8 subunit gamma) (Laminin-9 subunit gamma) (S-laminin subunit gamma) (S-LAM gamma)	Laminin subunit alpha-5 (Laminin-10 subunit alpha) (Laminin-11 subunit alpha) (Laminin-15 subunit alpha)	0.51	767	709	575	1	yes	5	4	R-HSA-3000157;R-HSA-3000178;R-HSA-3000171;R-HSA-1474228	4	0	yes	2319_ITGA6-ITGB4-Laminin10/12 complex;2318_ITGA6-ITGB4-Laminin10/12 complex	No	3	cell migration [GO:0016477];extracellular matrix organization [GO:0030198];substrate adhesion-dependent cell spreading [GO:0034446]	0	NF	7	extracellular matrix [GO:0031012];laminin-10 complex [GO:0043259];extracellular exosome [GO:0070062];laminin-11 complex [GO:0043260];extracellular space [GO:0005615];extracellular region [GO:0005576];basement membrane [GO:0005604]
Q9BVA1	P04350	Tubulin beta-2B chain	Tubulin beta-4A chain (Tubulin 5 beta) (Tubulin beta-4 chain)	0.51	1221	1112	902	0	no	22	28	R-HSA-68877;R-HSA-190861;R-HSA-5610787;R-HSA-2467813;R-HSA-6807878;R-HSA-983189;R-HSA-190840;R-HSA-1445148;R-HSA-5617833;R-HSA-437239;R-HSA-380320;R-HSA-389960;R-HSA-5620924;R-HSA-6811436;R-HSA-389957;R-HSA-6811434;R-HSA-389977;R-HSA-2500257;R-HSA-5663220;R-HSA-2132295;R-HSA-8852276;R-HSA-5626467	22	0	yes	NA	No	1	microtubule-based process [GO:0007017]	3	GTPase activity [GO:0003924];structural constituent of cytoskeleton [GO:0005200];GTP binding [GO:0005525]	2	nucleus [GO:0005634];microtubule [GO:0005874]
P78386	O76009	Keratin, type II cuticular Hb5 (Hair keratin K2.12) (Keratin-85) (K85) (Type II hair keratin Hb5) (Type-II keratin Kb25)	Keratin, type I cuticular Ha3-I (Hair keratin, type I Ha3-I) (Keratin-33A) (K33A)	0.51	75	29	17	0	no	0	0	NF	0	0	No	NA	Yes	0	NF	1	structural molecule activity [GO:0005198]	1	extracellular space [GO:0005615]
P11712	Q16696	Cytochrome P450 2C9 (EC 1.14.13.-) ((R)-limonene 6-monooxygenase) (EC 1.14.13.80) ((S)-limonene 6-monooxygenase) (EC 1.14.13.48) ((S)-limonene 7-monooxygenase) (EC 1.14.13.49) (CYPIIC9) (Cholesterol 25-hydroxylase) (EC 1.14.99.38) (Cytochrome P-450MP) (Cytochrome P450 MP-4) (Cytochrome P450 MP-8) (Cytochrome P450 PB-1) (S-mephenytoin 4-hydroxylase)	Cytochrome P450 2A13 (EC 1.14.14.1) (CYPIIA13)	0.51	60	58	49	0	no	4	4	R-HSA-211981;R-HSA-211999	2	0	yes	NA	No	2	xenobiotic metabolic process [GO:0006805];epoxygenase P450 pathway [GO:0019373]	5	heme binding [GO:0020037];steroid hydroxylase activity [GO:0008395];iron ion binding [GO:0005506];oxygen binding [GO:0019825];arachidonic acid epoxygenase activity [GO:0008392]	2	organelle membrane [GO:0031090];endoplasmic reticulum membrane [GO:0005789]
P05181	P11509	Cytochrome P450 2E1 (EC 1.14.13.-) (4-nitrophenol 2-hydroxylase) (EC 1.14.13.n7) (CYPIIE1) (Cytochrome P450-J) [Cleaved into: Cytochrome P450 2E1, N-terminally processed]	Cytochrome P450 2A6 (EC 1.14.13.-) (1,4-cineole 2-exo-monooxygenase) (CYPIIA6) (Coumarin 7-hydroxylase) (Cytochrome P450 IIA3) (Cytochrome P450(I))	0.51	57	58	46	0	NA	2	2	R-HSA-211981;R-HSA-211999	2	0	yes	NA	No	3	steroid metabolic process [GO:0008202];drug metabolic process [GO:0017144];epoxygenase P450 pathway [GO:0019373]	6	oxidoreductase activity, acting on paired donors, with incorporation or reduction of molecular oxygen, reduced flavin or flavoprotein as one donor, and incorporation of one atom of oxygen [GO:0016712];enzyme binding [GO:0019899];arachidonic acid epoxygenase activity [GO:0008392];heme binding [GO:0020037];iron ion binding [GO:0005506];steroid hydroxylase activity [GO:0008395]	1	endoplasmic reticulum membrane [GO:0005789]
Q6PEY2	P68104	Tubulin alpha-3E chain (Alpha-tubulin 3E)	Elongation factor 1-alpha 1 (EF-1-alpha-1) (Elongation factor Tu) (EF-Tu) (Eukaryotic elongation factor 1 A-1) (eEF1A-1) (Leukocyte receptor cluster member 7)	0.51	1579	1467	1356	0	no	19	3	NF	0	0	No	NA	No	0	NF	2	GTPase activity [GO:0003924];GTP binding [GO:0005525]	2	nucleus [GO:0005634];cytoplasm [GO:0005737]
P10632	P05177	Cytochrome P450 2C8 (EC 1.14.14.1) (CYPIIC8) (Cytochrome P450 IIC2) (Cytochrome P450 MP-12) (Cytochrome P450 MP-20) (Cytochrome P450 form 1) (S-mephenytoin 4-hydroxylase)	Cytochrome P450 1A2 (EC 1.14.14.1) (CYPIA2) (Cholesterol 25-hydroxylase) (Cytochrome P(3)450) (Cytochrome P450 4) (Cytochrome P450-P3)	0.51	54	54	44	0	no	4	5	R-HSA-2142816;R-HSA-2142670	2	0	No	NA	No	7	exogenous drug catabolic process [GO:0042738];oxidation-reduction process [GO:0055114];oxidative demethylation [GO:0070989];xenobiotic metabolic process [GO:0006805];drug metabolic process [GO:0017144];epoxygenase P450 pathway [GO:0019373];omega-hydroxylase P450 pathway [GO:0097267]	6	caffeine oxidase activity [GO:0034875];oxygen binding [GO:0019825];heme binding [GO:0020037];iron ion binding [GO:0005506];monooxygenase activity [GO:0004497];aromatase activity [GO:0070330]	2	organelle membrane [GO:0031090];endoplasmic reticulum membrane [GO:0005789]
Q13509	P04350	Tubulin beta-3 chain (Tubulin beta-4 chain) (Tubulin beta-III)	Tubulin beta-4A chain (Tubulin 5 beta) (Tubulin beta-4 chain)	0.5	1017	1144	808	0	no	22	28	R-HSA-68877;R-HSA-190861;R-HSA-5610787;R-HSA-2467813;R-HSA-6807878;R-HSA-983189;R-HSA-190840;R-HSA-1445148;R-HSA-5617833;R-HSA-437239;R-HSA-380320;R-HSA-389960;R-HSA-5620924;R-HSA-6811436;R-HSA-389957;R-HSA-6811434;R-HSA-389977;R-HSA-2500257;R-HSA-5663220;R-HSA-2132295;R-HSA-8852276;R-HSA-5626467	22	0	yes	NA	No	1	microtubule-based process [GO:0007017]	3	GTPase activity [GO:0003924];structural constituent of cytoskeleton [GO:0005200];GTP binding [GO:0005525]	4	nucleus [GO:0005634];neuronal cell body [GO:0043025];extracellular exosome [GO:0070062];microtubule [GO:0005874]
Q13748	Q5VTE0	Tubulin alpha-3C/D chain (Alpha-tubulin 2) (Alpha-tubulin 3C/D) (Tubulin alpha-2 chain)	Putative elongation factor 1-alpha-like 3 (EF-1-alpha-like 3) (Eukaryotic elongation factor 1 A-like 3) (eEF1A-like 3) (Eukaryotic translation elongation factor 1 alpha-1 pseudogene 5)	0.5	1599	1465	1370	0	no	22	1	NF	0	NA	NA	NA	No	0	NF	2	GTPase activity [GO:0003924];GTP binding [GO:0005525]	2	nucleus [GO:0005634];cytoplasm [GO:0005737]
Q6PEY2	Q9BYX7	Tubulin alpha-3E chain (Alpha-tubulin 3E)	Putative beta-actin-like protein 3 (Kappa-actin) (POTE ankyrin domain family member K)	0.5	1579	1687	1496	0	no	19	1	NF	0	NA	NA	NA	No	0	NF	0	NF	0	NF
Q7Z3Y8	P12035	Keratin, type I cytoskeletal 27 (Cytokeratin-27) (CK-27) (Keratin-25C) (K25C) (Keratin-27) (K27) (Type I inner root sheath-specific keratin-K25irs3)	Keratin, type II cytoskeletal 3 (65 kDa cytokeratin) (Cytokeratin-3) (CK-3) (Keratin-3) (K3) (Type-II keratin Kb3)	0.5	556	650	428	0	no	0	0	NF	0	0	No	NA	No	0	NF	1	structural molecule activity [GO:0005198]	2	intermediate filament [GO:0005882];extracellular exosome [GO:0070062]
Q13748	P68104	Tubulin alpha-3C/D chain (Alpha-tubulin 2) (Alpha-tubulin 3C/D) (Tubulin alpha-2 chain)	Elongation factor 1-alpha 1 (EF-1-alpha-1) (Elongation factor Tu) (EF-Tu) (Eukaryotic elongation factor 1 A-1) (eEF1A-1) (Leukocyte receptor cluster member 7)	0.5	1599	1467	1372	0	no	22	3	NF	0	0	No	NA	No	0	NF	2	GTPase activity [GO:0003924];GTP binding [GO:0005525]	2	nucleus [GO:0005634];cytoplasm [GO:0005737]
P11509	P11712	Cytochrome P450 2A6 (EC 1.14.13.-) (1,4-cineole 2-exo-monooxygenase) (CYPIIA6) (Coumarin 7-hydroxylase) (Cytochrome P450 IIA3) (Cytochrome P450(I))	Cytochrome P450 2C9 (EC 1.14.13.-) ((R)-limonene 6-monooxygenase) (EC 1.14.13.80) ((S)-limonene 6-monooxygenase) (EC 1.14.13.48) ((S)-limonene 7-monooxygenase) (EC 1.14.13.49) (CYPIIC9) (Cholesterol 25-hydroxylase) (EC 1.14.99.38) (Cytochrome P-450MP) (Cytochrome P450 MP-4) (Cytochrome P450 MP-8) (Cytochrome P450 PB-1) (S-mephenytoin 4-hydroxylase)	0.5	58	60	49	0	NA	2	4	R-HSA-211981;R-HSA-211999	2	0	yes	NA	No	4	exogenous drug catabolic process [GO:0042738];steroid metabolic process [GO:0008202];drug metabolic process [GO:0017144];epoxygenase P450 pathway [GO:0019373]	4	heme binding [GO:0020037];steroid hydroxylase activity [GO:0008395];iron ion binding [GO:0005506];arachidonic acid epoxygenase activity [GO:0008392]	2	organelle membrane [GO:0031090];endoplasmic reticulum membrane [GO:0005789]
P05181	P11712	Cytochrome P450 2E1 (EC 1.14.13.-) (4-nitrophenol 2-hydroxylase) (EC 1.14.13.n7) (CYPIIE1) (Cytochrome P450-J) [Cleaved into: Cytochrome P450 2E1, N-terminally processed]	Cytochrome P450 2C9 (EC 1.14.13.-) ((R)-limonene 6-monooxygenase) (EC 1.14.13.80) ((S)-limonene 6-monooxygenase) (EC 1.14.13.48) ((S)-limonene 7-monooxygenase) (EC 1.14.13.49) (CYPIIC9) (Cholesterol 25-hydroxylase) (EC 1.14.99.38) (Cytochrome P-450MP) (Cytochrome P450 MP-4) (Cytochrome P450 MP-8) (Cytochrome P450 PB-1) (S-mephenytoin 4-hydroxylase)	0.5	57	60	51	0	no	2	4	R-HSA-211981;R-HSA-211999	2	0	yes	NA	No	6	steroid metabolic process [GO:0008202];oxidation-reduction process [GO:0055114];monoterpenoid metabolic process [GO:0016098];xenobiotic metabolic process [GO:0006805];epoxygenase P450 pathway [GO:0019373];drug metabolic process [GO:0017144]	7	oxygen binding [GO:0019825];arachidonic acid epoxygenase activity [GO:0008392];heme binding [GO:0020037];iron ion binding [GO:0005506];monooxygenase activity [GO:0004497];steroid hydroxylase activity [GO:0008395];oxidoreductase activity [GO:0016491]	1	endoplasmic reticulum membrane [GO:0005789]
P0CG38	Q562R1	POTE ankyrin domain family member I	Beta-actin-like protein 2 (Kappa-actin)	0.5	1602	1584	1452	0	no	0	0	NF	0	0	No	NA	No	0	NF	0	NF	2	extracellular space [GO:0005615];extracellular exosome [GO:0070062]
Q09666	Q15149	Neuroblast differentiation-associated protein AHNAK (Desmoyokin)	Plectin (PCN) (PLTN) (Hemidesmosomal protein 1) (HD1) (Plectin-1)	0.5	1296	1387	1187	0	NA	0	3	NF	0	0	No	NA	No	0	NF	2	cadherin binding involved in cell-cell adhesion [GO:0098641];poly(A) RNA binding [GO:0044822]	8	cell-cell adherens junction [GO:0005913];extracellular exosome [GO:0070062];costamere [GO:0043034];cytoplasm [GO:0005737];focal adhesion [GO:0005925];sarcolemma [GO:0042383];plasma membrane [GO:0005886];cytosol [GO:0005829]
P25705	P06576	ATP synthase subunit alpha, mitochondrial	ATP synthase subunit beta, mitochondrial (EC 3.6.3.14)	0.5	1168	1229	1022	0	NA	2	3	R-HSA-1268020;R-HSA-163210	2	0	No	563_F1F0-ATP synthase (EC 3.6.3.14), mitochondrial	No	4	ATP biosynthetic process [GO:0006754];mitochondrial ATP synthesis coupled proton transport [GO:0042776];lipid metabolic process [GO:0006629];ATP hydrolysis coupled proton transport [GO:0015991]	5	proton-transporting ATP synthase activity, rotational mechanism [GO:0046933];transmembrane transporter activity [GO:0022857];ATP binding [GO:0005524];proton-transporting ATPase activity, rotational mechanism [GO:0046961];MHC class I protein binding [GO:0042288]	8	extracellular matrix [GO:0031012];extracellular exosome [GO:0070062];mitochondrial matrix [GO:0005759];mitochondrial proton-transporting ATP synthase complex [GO:0005753];mitochondrion [GO:0005739];myelin sheath [GO:0043209];membrane [GO:0016020];plasma membrane [GO:0005886]
P00338	P07195	L-lactate dehydrogenase A chain (LDH-A) (EC 1.1.1.27) (Cell proliferation-inducing gene 19 protein) (LDH muscle subunit) (LDH-M) (Renal carcinoma antigen NY-REN-59)	L-lactate dehydrogenase B chain (LDH-B) (EC 1.1.1.27) (LDH heart subunit) (LDH-H) (Renal carcinoma antigen NY-REN-46)	0.5	1039	1075	833	1	NA	1	1	R-HSA-70268	1	0	yes	NA	No	3	lactate metabolic process [GO:0006089];NAD metabolic process [GO:0019674];pyruvate metabolic process [GO:0006090]	2	L-lactate dehydrogenase activity [GO:0004459];NAD binding [GO:0051287]	3	membrane [GO:0016020];cytosol [GO:0005829];extracellular exosome [GO:0070062]
P10632	P11712	Cytochrome P450 2C8 (EC 1.14.14.1) (CYPIIC8) (Cytochrome P450 IIC2) (Cytochrome P450 MP-12) (Cytochrome P450 MP-20) (Cytochrome P450 form 1) (S-mephenytoin 4-hydroxylase)	Cytochrome P450 2C9 (EC 1.14.13.-) ((R)-limonene 6-monooxygenase) (EC 1.14.13.80) ((S)-limonene 6-monooxygenase) (EC 1.14.13.48) ((S)-limonene 7-monooxygenase) (EC 1.14.13.49) (CYPIIC9) (Cholesterol 25-hydroxylase) (EC 1.14.99.38) (Cytochrome P-450MP) (Cytochrome P450 MP-4) (Cytochrome P450 MP-8) (Cytochrome P450 PB-1) (S-mephenytoin 4-hydroxylase)	0.5	49	58	42	0	no	4	4	R-HSA-211981;R-HSA-2142816;R-HSA-2142670;R-HSA-211999	4	0	yes	NA	No	7	exogenous drug catabolic process [GO:0042738];oxidation-reduction process [GO:0055114];oxidative demethylation [GO:0070989];xenobiotic metabolic process [GO:0006805];drug metabolic process [GO:0017144];epoxygenase P450 pathway [GO:0019373];omega-hydroxylase P450 pathway [GO:0097267]	7	caffeine oxidase activity [GO:0034875];oxygen binding [GO:0019825];arachidonic acid epoxygenase activity [GO:0008392];heme binding [GO:0020037];iron ion binding [GO:0005506];monooxygenase activity [GO:0004497];steroid hydroxylase activity [GO:0008395]	2	organelle membrane [GO:0031090];endoplasmic reticulum membrane [GO:0005789]
P11142	P11021	Heat shock cognate 71 kDa protein (Heat shock 70 kDa protein 8) (Lipopolysaccharide-associated protein 1) (LAP-1) (LPS-associated protein 1)	78 kDa glucose-regulated protein (GRP-78) (Endoplasmic reticulum lumenal Ca(2+)-binding protein grp78) (Heat shock 70 kDa protein 5) (Immunoglobulin heavy chain-binding protein) (BiP)	0.49	1369	1211	1057	1	yes	9	7	R-HSA-3371453	1	0	yes	2721_HCF-1 complex;929_CEN complex	No	0	NF	6	enzyme binding [GO:0019899];ATP binding [GO:0005524];unfolded protein binding [GO:0051082];cadherin binding involved in cell-cell adhesion [GO:0098641];ubiquitin protein ligase binding [GO:0031625];ATPase activity [GO:0016887]	9	cell-cell adherens junction [GO:0005913];extracellular matrix [GO:0031012];extracellular exosome [GO:0070062];focal adhesion [GO:0005925];myelin sheath [GO:0043209];membrane [GO:0016020];melanosome [GO:0042470];nucleus [GO:0005634];plasma membrane [GO:0005886]
Q13509	Q71U36	Tubulin beta-3 chain (Tubulin beta-4 chain) (Tubulin beta-III)	Tubulin alpha-1A chain (Alpha-tubulin 3) (Tubulin B-alpha-1) (Tubulin alpha-3 chain)	0.49	1390	1654	1330	0	yes	22	28	R-HSA-68877;R-HSA-190861;R-HSA-5610787;R-HSA-2467813;R-HSA-6807878;R-HSA-983189;R-HSA-190840;R-HSA-1445148;R-HSA-5617833;R-HSA-437239;R-HSA-380320;R-HSA-389960;R-HSA-5620924;R-HSA-6811436;R-HSA-389957;R-HSA-6811434;R-HSA-389977;R-HSA-2500257;R-HSA-5663220;R-HSA-2132295;R-HSA-8852276;R-HSA-5626467	22	0	No	NA	No	1	microtubule-based process [GO:0007017]	3	GTPase activity [GO:0003924];structural constituent of cytoskeleton [GO:0005200];GTP binding [GO:0005525]	3	nucleus [GO:0005634];extracellular exosome [GO:0070062];microtubule [GO:0005874]
P31513	P10632	Dimethylaniline monooxygenase [N-oxide-forming] 3 (EC 1.14.13.8) (Dimethylaniline oxidase 3) (FMO II) (FMO form 2) (Hepatic flavin-containing monooxygenase 3) (FMO 3) (Trimethylamine monooxygenase) (EC 1.14.13.148)	Cytochrome P450 2C8 (EC 1.14.14.1) (CYPIIC8) (Cytochrome P450 IIC2) (Cytochrome P450 MP-12) (Cytochrome P450 MP-20) (Cytochrome P450 form 1) (S-mephenytoin 4-hydroxylase)	0.49	67	54	46	0	no	2	4	NF	0	0	No	NA	No	3	oxidation-reduction process [GO:0055114];drug metabolic process [GO:0017144];xenobiotic metabolic process [GO:0006805]	1	monooxygenase activity [GO:0004497]	2	organelle membrane [GO:0031090];endoplasmic reticulum membrane [GO:0005789]
P0CG38	Q6PEY2	POTE ankyrin domain family member I	Tubulin alpha-3E chain (Alpha-tubulin 3E)	0.49	1639	1579	1462	0	no	0	19	NF	0	0	No	NA	No	0	NF	0	NF	0	NF
P05181	P33261	Cytochrome P450 2E1 (EC 1.14.13.-) (4-nitrophenol 2-hydroxylase) (EC 1.14.13.n7) (CYPIIE1) (Cytochrome P450-J) [Cleaved into: Cytochrome P450 2E1, N-terminally processed]	Cytochrome P450 2C19 (EC 1.14.13.-) ((R)-limonene 6-monooxygenase) (EC 1.14.13.80) ((S)-limonene 6-monooxygenase) (EC 1.14.13.48) ((S)-limonene 7-monooxygenase) (EC 1.14.13.49) (CYPIIC17) (CYPIIC19) (Cytochrome P450-11A) (Cytochrome P450-254C) (Mephenytoin 4-hydroxylase)	0.49	57	57	49	0	no	2	4	R-HSA-211981;R-HSA-211999	2	0	yes	NA	No	7	steroid metabolic process [GO:0008202];oxidation-reduction process [GO:0055114];monoterpenoid metabolic process [GO:0016098];xenobiotic metabolic process [GO:0006805];heterocycle metabolic process [GO:0046483];epoxygenase P450 pathway [GO:0019373];drug metabolic process [GO:0017144]	8	oxygen binding [GO:0019825];enzyme binding [GO:0019899];arachidonic acid epoxygenase activity [GO:0008392];heme binding [GO:0020037];iron ion binding [GO:0005506];monooxygenase activity [GO:0004497];steroid hydroxylase activity [GO:0008395];oxidoreductase activity [GO:0016491]	1	endoplasmic reticulum membrane [GO:0005789]
Q9BQE3	Q6S8J3	Tubulin alpha-1C chain (Alpha-tubulin 6) (Tubulin alpha-6 chain)	POTE ankyrin domain family member E (ANKRD26-like family C member 1A) (Prostate, ovary, testis-expressed protein on chromosome 2) (POTE-2)	0.49	1659	1710	1576	0	no	22	0	NF	0	0	No	NA	No	0	NF	0	NF	0	NF
P35527	P04264	Keratin, type I cytoskeletal 9 (Cytokeratin-9) (CK-9) (Keratin-9) (K9)	Keratin, type II cytoskeletal 1 (67 kDa cytokeratin) (Cytokeratin-1) (CK-1) (Hair alpha protein) (Keratin-1) (K1) (Type-II keratin Kb1)	0.49	747	1246	713	0	yes	0	0	NF	0	0	No	NA	Yes	0	NF	0	NF	4	nucleus [GO:0005634];extracellular space [GO:0005615];extracellular exosome [GO:0070062];membrane [GO:0016020]
P68366	P68104	Tubulin alpha-4A chain (Alpha-tubulin 1) (Testis-specific alpha-tubulin) (Tubulin H2-alpha) (Tubulin alpha-1 chain)	Elongation factor 1-alpha 1 (EF-1-alpha-1) (Elongation factor Tu) (EF-Tu) (Eukaryotic elongation factor 1 A-1) (eEF1A-1) (Leukocyte receptor cluster member 7)	0.49	1599	1467	1371	0	yes	29	3	NF	0	0	No	NF	No	0	NF	2	GTPase activity [GO:0003924];GTP binding [GO:0005525]	2	cytosol [GO:0005829];extracellular exosome [GO:0070062]
P30041	P60174	Peroxiredoxin-6 (EC 1.11.1.15) (1-Cys peroxiredoxin) (1-Cys PRX) (24 kDa protein) (Acidic calcium-independent phospholipase A2) (aiPLA2) (EC 3.1.1.-) (Antioxidant protein 2) (Liver 2D page spot 40) (Non-selenium glutathione peroxidase) (NSGPx) (EC 1.11.1.9) (Red blood cells page spot 12)	Triosephosphate isomerase (TIM) (EC 5.3.1.1) (Triose-phosphate isomerase)	0.49	720	964	648	0	yes	1	2	NF	0	0	No	NA	No	0	NF	1	ubiquitin protein ligase binding [GO:0031625]	3	extracellular space [GO:0005615];cytosol [GO:0005829];extracellular exosome [GO:0070062]
Q6PEY2	A5A3E0	Tubulin alpha-3E chain (Alpha-tubulin 3E)	POTE ankyrin domain family member F (ANKRD26-like family C member 1B) (Chimeric POTE-actin protein)	0.49	1579	1691	1495	0	no	19	0	NF	0	0	No	NA	No	0	NF	0	NF	0	NF
Q9Y2P5	P31513	Bile acyl-CoA synthetase (BACS) (EC 6.2.1.7) (Bile acid-CoA ligase) (BA-CoA ligase) (BAL) (Cholate--CoA ligase) (Fatty acid transport protein 5) (FATP-5) (Fatty-acid-coenzyme A ligase, very long-chain 3) (Solute carrier family 27 member 5) (Very long-chain acyl-CoA synthetase homolog 2) (VLCS-H2) (VLCSH2) (Very long-chain acyl-CoA synthetase-related protein) (VLACS-related) (VLACSR)	Dimethylaniline monooxygenase [N-oxide-forming] 3 (EC 1.14.13.8) (Dimethylaniline oxidase 3) (FMO II) (FMO form 2) (Hepatic flavin-containing monooxygenase 3) (FMO 3) (Trimethylamine monooxygenase) (EC 1.14.13.148)	0.49	78	67	53	0	no	3	2	NF	0	0	No	NA	No	0	NF	0	NF	1	endoplasmic reticulum membrane [GO:0005789]
Q9BUF5	Q9NY65	Tubulin beta-6 chain (Tubulin beta class V)	Tubulin alpha-8 chain (Alpha-tubulin 8) (Tubulin alpha chain-like 2)	0.49	1253	1528	1148	0	no	22	19	R-HSA-68877;R-HSA-190861;R-HSA-2467813;R-HSA-6807878;R-HSA-983189;R-HSA-190840;R-HSA-1445148;R-HSA-5617833;R-HSA-437239;R-HSA-380320;R-HSA-389960;R-HSA-6811436;R-HSA-6811434;R-HSA-389977;R-HSA-2500257;R-HSA-5663220;R-HSA-2132295;R-HSA-8852276;R-HSA-5626467	19	0	No	NA	No	1	microtubule-based process [GO:0007017]	3	GTPase activity [GO:0003924];structural constituent of cytoskeleton [GO:0005200];GTP binding [GO:0005525]	2	cytoplasm [GO:0005737];microtubule [GO:0005874]
P23942	P04000	Peripherin-2 (Retinal degeneration slow protein) (Tetraspanin-22) (Tspan-22)	Long-wave-sensitive opsin 1 (Red cone photoreceptor pigment) (Red-sensitive opsin) (ROP)	0.49	15	15	11	0	no	0	4	NF	0	0	No	NA	No	1	visual perception [GO:0007601]	0	NF	2	integral component of plasma membrane [GO:0005887];photoreceptor outer segment [GO:0001750]
P23942	P04001	Peripherin-2 (Retinal degeneration slow protein) (Tetraspanin-22) (Tspan-22)	Medium-wave-sensitive opsin 1 (Green cone photoreceptor pigment) (Green-sensitive opsin) (GOP)	0.49	15	15	11	0	no	0	4	NF	0	0	No	NA	No	1	visual perception [GO:0007601]	0	NF	2	integral component of plasma membrane [GO:0005887];photoreceptor outer segment [GO:0001750]
P11142	P08133	Heat shock cognate 71 kDa protein (Heat shock 70 kDa protein 8) (Lipopolysaccharide-associated protein 1) (LAP-1) (LPS-associated protein 1)	Annexin A6 (67 kDa calelectrin) (Annexin VI) (Annexin-6) (Calphobindin-II) (CPB-II) (Chromobindin-20) (Lipocortin VI) (Protein III) (p68) (p70)	0.49	1434	1249	1106	0	no	9	1	NF	0	0	No	NF	No	0	NF	0	NF	6	extracellular exosome [GO:0070062];lysosomal membrane [GO:0005765];focal adhesion [GO:0005925];membrane [GO:0016020];melanosome [GO:0042470];nucleus [GO:0005634]
Q9Y2P5	P05177	Bile acyl-CoA synthetase (BACS) (EC 6.2.1.7) (Bile acid-CoA ligase) (BA-CoA ligase) (BAL) (Cholate--CoA ligase) (Fatty acid transport protein 5) (FATP-5) (Fatty-acid-coenzyme A ligase, very long-chain 3) (Solute carrier family 27 member 5) (Very long-chain acyl-CoA synthetase homolog 2) (VLCS-H2) (VLCSH2) (Very long-chain acyl-CoA synthetase-related protein) (VLACS-related) (VLACSR)	Cytochrome P450 1A2 (EC 1.14.14.1) (CYPIA2) (Cholesterol 25-hydroxylase) (Cytochrome P(3)450) (Cytochrome P450 4) (Cytochrome P450-P3)	0.49	78	54	49	0	no	3	5	NF	0	0	No	NA	No	0	NF	0	NF	1	endoplasmic reticulum membrane [GO:0005789]
P78385	O76009	Keratin, type II cuticular Hb3 (Hair keratin K2.10) (Keratin-83) (K83) (Type II hair keratin Hb3) (Type-II keratin Kb23)	Keratin, type I cuticular Ha3-I (Hair keratin, type I Ha3-I) (Keratin-33A) (K33A)	0.49	73	29	17	0	no	0	0	NF	0	0	No	NA	Yes	0	NF	1	structural molecule activity [GO:0005198]	1	extracellular space [GO:0005615]
P31513	P11509	Dimethylaniline monooxygenase [N-oxide-forming] 3 (EC 1.14.13.8) (Dimethylaniline oxidase 3) (FMO II) (FMO form 2) (Hepatic flavin-containing monooxygenase 3) (FMO 3) (Trimethylamine monooxygenase) (EC 1.14.13.148)	Cytochrome P450 2A6 (EC 1.14.13.-) (1,4-cineole 2-exo-monooxygenase) (CYPIIA6) (Coumarin 7-hydroxylase) (Cytochrome P450 IIA3) (Cytochrome P450(I))	0.49	67	58	48	0	NA	2	2	NF	0	0	No	NA	No	1	drug metabolic process [GO:0017144]	0	NF	2	organelle membrane [GO:0031090];endoplasmic reticulum membrane [GO:0005789]
Q05707	P02751	Collagen alpha-1(XIV) chain (Undulin)	Fibronectin (FN) (Cold-insoluble globulin) (CIG) [Cleaved into: Anastellin; Ugl-Y1; Ugl-Y2; Ugl-Y3]	0.49	775	901	648	0	NA	2	14	NF	0	0	No	NA	No	1	extracellular matrix organization [GO:0030198]	1	collagen binding [GO:0005518]	3	extracellular region [GO:0005576];extracellular space [GO:0005615];extracellular exosome [GO:0070062]
P21549	P05089	Serine--pyruvate aminotransferase (SPT) (EC 2.6.1.51) (Alanine--glyoxylate aminotransferase) (AGT) (EC 2.6.1.44)	Arginase-1 (EC 3.5.3.1) (Liver-type arginase) (Type I arginase)	0.49	127	142	96	0	no	1	1	NF	0	0	No	NA	No	0	NF	0	NF	0	NF
Q15323	Q14525	Keratin, type I cuticular Ha1 (Hair keratin, type I Ha1) (Keratin-31) (K31)	Keratin, type I cuticular Ha3-II (Hair keratin, type I Ha3-II) (Keratin-33B) (K33B)	0.49	26	15	15	0	no	0	0	NF	0	0	yes	NA	Yes	0	NF	0	NF	3	intermediate filament [GO:0005882];extracellular space [GO:0005615];extracellular exosome [GO:0070062]
Q16696	P05177	Cytochrome P450 2A13 (EC 1.14.14.1) (CYPIIA13)	Cytochrome P450 1A2 (EC 1.14.14.1) (CYPIA2) (Cholesterol 25-hydroxylase) (Cytochrome P(3)450) (Cytochrome P450 4) (Cytochrome P450-P3)	0.49	58	54	45	0	no	4	5	R-HSA-5423646	1	0	No	NA	No	2	xenobiotic metabolic process [GO:0006805];epoxygenase P450 pathway [GO:0019373]	4	heme binding [GO:0020037];iron ion binding [GO:0005506];oxygen binding [GO:0019825];aromatase activity [GO:0070330]	2	organelle membrane [GO:0031090];endoplasmic reticulum membrane [GO:0005789]
P68366	Q5VTE0	Tubulin alpha-4A chain (Alpha-tubulin 1) (Testis-specific alpha-tubulin) (Tubulin H2-alpha) (Tubulin alpha-1 chain)	Putative elongation factor 1-alpha-like 3 (EF-1-alpha-like 3) (Eukaryotic elongation factor 1 A-like 3) (eEF1A-like 3) (Eukaryotic translation elongation factor 1 alpha-1 pseudogene 5)	0.49	1599	1465	1370	0	no	29	1	NF	0	NA	NA	NA	No	0	NF	2	GTPase activity [GO:0003924];GTP binding [GO:0005525]	1	extracellular exosome [GO:0070062]
P06733	P06576	Alpha-enolase (EC 4.2.1.11) (2-phospho-D-glycerate hydro-lyase) (C-myc promoter-binding protein) (Enolase 1) (MBP-1) (MPB-1) (Non-neural enolase) (NNE) (Phosphopyruvate hydratase) (Plasminogen-binding protein)	ATP synthase subunit beta, mitochondrial (EC 3.6.3.14)	0.49	1341	1229	1118	0	NA	2	3	NF	0	0	No	NA	No	0	NF	0	NF	4	myelin sheath [GO:0043209];nucleus [GO:0005634];extracellular exosome [GO:0070062];membrane [GO:0016020]
Q6S8J3	P07437	POTE ankyrin domain family member E (ANKRD26-like family C member 1A) (Prostate, ovary, testis-expressed protein on chromosome 2) (POTE-2)	Tubulin beta chain (Tubulin beta-5 chain)	0.48	1710	1570	1499	0	no	0	6	NF	0	0	No	NA	No	0	NF	0	NF	1	extracellular exosome [GO:0070062]
Q5VTE0	Q9BYX7	Putative elongation factor 1-alpha-like 3 (EF-1-alpha-like 3) (Eukaryotic elongation factor 1 A-like 3) (eEF1A-like 3) (Eukaryotic translation elongation factor 1 alpha-1 pseudogene 5)	Putative beta-actin-like protein 3 (Kappa-actin) (POTE ankyrin domain family member K)	0.48	1465	1687	1389	0	no	1	1	NF	0	NA	NA	NA	No	0	NF	0	NF	1	extracellular exosome [GO:0070062]
Q9BQE3	Q5VTE0	Tubulin alpha-1C chain (Alpha-tubulin 6) (Tubulin alpha-6 chain)	Putative elongation factor 1-alpha-like 3 (EF-1-alpha-like 3) (Eukaryotic elongation factor 1 A-like 3) (eEF1A-like 3) (Eukaryotic translation elongation factor 1 alpha-1 pseudogene 5)	0.48	1659	1465	1406	0	no	22	1	NF	0	NA	NA	NA	No	0	NF	2	GTPase activity [GO:0003924];GTP binding [GO:0005525]	2	nucleus [GO:0005634];cytoplasm [GO:0005737]
P07437	P06733	Tubulin beta chain (Tubulin beta-5 chain)	Alpha-enolase (EC 4.2.1.11) (2-phospho-D-glycerate hydro-lyase) (C-myc promoter-binding protein) (Enolase 1) (MBP-1) (MPB-1) (Non-neural enolase) (NNE) (Phosphopyruvate hydratase) (Plasminogen-binding protein)	0.48	1570	1341	1236	0	NA	6	2	NF	0	0	No	NA	No	0	NF	0	NF	2	nucleus [GO:0005634];extracellular exosome [GO:0070062]
Q71U36	P68104	Tubulin alpha-1A chain (Alpha-tubulin 3) (Tubulin B-alpha-1) (Tubulin alpha-3 chain)	Elongation factor 1-alpha 1 (EF-1-alpha-1) (Elongation factor Tu) (EF-Tu) (Eukaryotic elongation factor 1 A-1) (eEF1A-1) (Leukocyte receptor cluster member 7)	0.48	1654	1467	1403	0	no	28	3	NF	0	0	No	3055_Nop56p-associated pre-rRNA complex	No	0	NF	2	GTPase activity [GO:0003924];GTP binding [GO:0005525]	3	nucleus [GO:0005634];cytosol [GO:0005829];extracellular exosome [GO:0070062]
P31946	P27348	14-3-3 protein beta/alpha (Protein 1054) (Protein kinase C inhibitor protein 1) (KCIP-1) [Cleaved into: 14-3-3 protein beta/alpha, N-terminally processed]	14-3-3 protein theta (14-3-3 protein T-cell) (14-3-3 protein tau) (Protein HS1)	0.48	648	558	422	1	yes	16	5	R-HSA-5628897;R-HSA-1445148;R-HSA-111447;R-HSA-5625740;R-HSA-75035	5	0	yes	5919_BRAF-RAF1-14-3-3 complex;5199_Kinase maturation complex 1	No	4	membrane organization [GO:0061024];positive regulation of protein insertion into mitochondrial membrane involved in apoptotic signaling pathway [GO:1900740];negative regulation of transcription, DNA-templated [GO:0045892];protein targeting [GO:0006605]	0	NF	7	cytosol [GO:0005829];cytoplasm [GO:0005737];mitochondrion [GO:0005739];cytoplasmic vesicle membrane [GO:0030659];focal adhesion [GO:0005925];membrane [GO:0016020];extracellular exosome [GO:0070062]
Q9BQE3	P68104	Tubulin alpha-1C chain (Alpha-tubulin 6) (Tubulin alpha-6 chain)	Elongation factor 1-alpha 1 (EF-1-alpha-1) (Elongation factor Tu) (EF-Tu) (Eukaryotic elongation factor 1 A-1) (eEF1A-1) (Leukocyte receptor cluster member 7)	0.48	1659	1467	1407	1	yes	22	3	NF	0	0	No	NF	No	0	NF	2	GTPase activity [GO:0003924];GTP binding [GO:0005525]	2	nucleus [GO:0005634];cytoplasm [GO:0005737]
Q6PEY2	Q05639	Tubulin alpha-3E chain (Alpha-tubulin 3E)	Elongation factor 1-alpha 2 (EF-1-alpha-2) (Eukaryotic elongation factor 1 A-2) (eEF1A-2) (Statin-S1)	0.48	1579	1397	1295	0	no	19	1	NF	0	0	No	NA	No	0	NF	2	GTPase activity [GO:0003924];GTP binding [GO:0005525]	1	cytoplasm [GO:0005737]
Q6P2Q9	O75643	Pre-mRNA-processing-splicing factor 8 (220 kDa U5 snRNP-specific protein) (PRP8 homolog) (Splicing factor Prp8) (p220)	U5 small nuclear ribonucleoprotein 200 kDa helicase (EC 3.6.4.13) (Activating signal cointegrator 1 complex subunit 3-like 1) (BRR2 homolog) (U5 snRNP-specific 200 kDa protein) (U5-200KD)	0.48	603	614	451	1	yes	2	2	R-HSA-72165;R-HSA-72163	2	0	No	1181_C complex spliceosome;351_Spliceosome	No	1	mRNA splicing, via spliceosome [GO:0000398]	1	poly(A) RNA binding [GO:0044822]	5	nucleus [GO:0005634];nucleoplasm [GO:0005654];catalytic step 2 spliceosome [GO:0071013];U5 snRNP [GO:0005682];membrane [GO:0016020]
Q13748	Q9BYX7	Tubulin alpha-3C/D chain (Alpha-tubulin 2) (Alpha-tubulin 3C/D) (Tubulin alpha-2 chain)	Putative beta-actin-like protein 3 (Kappa-actin) (POTE ankyrin domain family member K)	0.48	1599	1687	1511	0	no	22	1	NF	0	NA	NA	NA	No	0	NF	0	NF	0	NF
Q9BQE3	A5A3E0	Tubulin alpha-1C chain (Alpha-tubulin 6) (Tubulin alpha-6 chain)	POTE ankyrin domain family member F (ANKRD26-like family C member 1B) (Chimeric POTE-actin protein)	0.48	1659	1691	1564	0	no	22	0	NF	0	0	No	NA	No	0	NF	0	NF	0	NF
Q6S8J3	Q6PEY2	POTE ankyrin domain family member E (ANKRD26-like family C member 1A) (Prostate, ovary, testis-expressed protein on chromosome 2) (POTE-2)	Tubulin alpha-3E chain (Alpha-tubulin 3E)	0.48	1710	1579	1509	0	no	0	19	NF	0	0	No	NA	No	0	NF	0	NF	0	NF
Q6S8J3	Q71U36	POTE ankyrin domain family member E (ANKRD26-like family C member 1A) (Prostate, ovary, testis-expressed protein on chromosome 2) (POTE-2)	Tubulin alpha-1A chain (Alpha-tubulin 3) (Tubulin B-alpha-1) (Tubulin alpha-3 chain)	0.48	1710	1654	1569	0	no	0	28	NF	0	0	No	NA	No	0	NF	0	NF	1	extracellular exosome [GO:0070062]
Q6S8J3	P68104	POTE ankyrin domain family member E (ANKRD26-like family C member 1A) (Prostate, ovary, testis-expressed protein on chromosome 2) (POTE-2)	Elongation factor 1-alpha 1 (EF-1-alpha-1) (Elongation factor Tu) (EF-Tu) (Eukaryotic elongation factor 1 A-1) (eEF1A-1) (Leukocyte receptor cluster member 7)	0.48	1710	1467	1407	0	no	0	3	NF	0	0	No	NA	No	0	NF	0	NF	2	extracellular space [GO:0005615];extracellular exosome [GO:0070062]
P68104	A5A3E0	Elongation factor 1-alpha 1 (EF-1-alpha-1) (Elongation factor Tu) (EF-Tu) (Eukaryotic elongation factor 1 A-1) (eEF1A-1) (Leukocyte receptor cluster member 7)	POTE ankyrin domain family member F (ANKRD26-like family C member 1B) (Chimeric POTE-actin protein)	0.48	1467	1691	1394	0	no	3	0	NF	0	0	No	NA	No	0	NF	0	NF	2	extracellular space [GO:0005615];extracellular exosome [GO:0070062]
Q13509	P68363	Tubulin beta-3 chain (Tubulin beta-4 chain) (Tubulin beta-III)	Tubulin alpha-1B chain (Alpha-tubulin ubiquitous) (Tubulin K-alpha-1) (Tubulin alpha-ubiquitous chain)	0.48	1390	1662	1331	1	yes	22	21	R-HSA-68877;R-HSA-190861;R-HSA-5610787;R-HSA-2467813;R-HSA-6807878;R-HSA-983189;R-HSA-190840;R-HSA-1445148;R-HSA-5617833;R-HSA-437239;R-HSA-380320;R-HSA-389960;R-HSA-5620924;R-HSA-6811436;R-HSA-6811434;R-HSA-389977;R-HSA-2500257;R-HSA-5663220;R-HSA-2132295;R-HSA-8852276;R-HSA-5626467	21	0	No	NA	No	1	microtubule-based process [GO:0007017]	3	GTPase activity [GO:0003924];structural constituent of cytoskeleton [GO:0005200];GTP binding [GO:0005525]	2	extracellular exosome [GO:0070062];microtubule [GO:0005874]
A0M8Q6	P0CG04	Ig lambda-7 chain C region	Ig lambda-1 chain C regions	0.48	226	218	157	0	no	14	14	R-HSA-2871796;R-HSA-2730905;R-HSA-166663;R-HSA-173623;R-HSA-2871837;R-HSA-2168880;R-HSA-2454202;R-HSA-2029485;R-HSA-5690714;R-HSA-2871809;R-HSA-198933;R-HSA-2029481;R-HSA-983695;R-HSA-2029482	14	NA	NA	NA	No	12	regulation of immune response [GO:0050776];phagocytosis, recognition [GO:0006910];complement activation, classical pathway [GO:0006958];innate immune response [GO:0045087];defense response to bacterium [GO:0042742];Fc-epsilon receptor signaling pathway [GO:0038095];phagocytosis, engulfment [GO:0006911];B cell receptor signaling pathway [GO:0050853];Fc-gamma receptor signaling pathway involved in …	3	immunoglobulin receptor binding [GO:0034987];antigen binding [GO:0003823];serine-type endopeptidase activity [GO:0004252]	5	plasma membrane [GO:0005886];immunoglobulin complex, circulating [GO:0042571];extracellular region [GO:0005576];external side of plasma membrane [GO:0009897];blood microparticle [GO:0072562]
P35579	P21333	Myosin-9 (Cellular myosin heavy chain, type A) (Myosin heavy chain 9) (Myosin heavy chain, non-muscle IIa) (Non-muscle myosin heavy chain A) (NMMHC-A) (Non-muscle myosin heavy chain IIa) (NMMHC II-a) (NMMHC-IIA)	Filamin-A (FLN-A) (Actin-binding protein 280) (ABP-280) (Alpha-filamin) (Endothelial actin-binding protein) (Filamin-1) (Non-muscle filamin)	0.48	1582	1665	1527	1	yes	7	4	R-HSA-5627123	1	0	No	NA	No	2	platelet aggregation [GO:0070527];actin cytoskeleton reorganization [GO:0031532]	4	actin filament binding [GO:0051015];protein homodimerization activity [GO:0042803];poly(A) RNA binding [GO:0044822];cadherin binding involved in cell-cell adhesion [GO:0098641]	10	cell-cell adherens junction [GO:0005913];extracellular matrix [GO:0031012];extracellular exosome [GO:0070062];cytoplasm [GO:0005737];actin cytoskeleton [GO:0015629];focal adhesion [GO:0005925];membrane [GO:0016020];nucleus [GO:0005634];plasma membrane [GO:0005886];cytosol [GO:0005829]
Q7Z5P4	O75452	17-beta-hydroxysteroid dehydrogenase 13 (17-beta-HSD 13) (EC 1.1.-.-) (Short chain dehydrogenase/reductase family 16C member 3) (Short-chain dehydrogenase/reductase 9)	Retinol dehydrogenase 16 (EC 1.1.-.-) (Microsomal NAD(+)-dependent retinol dehydrogenase 4) (RoDH-4) (Short chain dehydrogenase/reductase family 9C member 8) (Sterol/retinol dehydrogenase)	0.48	69	54	36	0	no	0	2	NF	0	0	No	NA	No	0	NF	0	NF	0	NF
Q6S8J3	P68363	POTE ankyrin domain family member E (ANKRD26-like family C member 1A) (Prostate, ovary, testis-expressed protein on chromosome 2) (POTE-2)	Tubulin alpha-1B chain (Alpha-tubulin ubiquitous) (Tubulin K-alpha-1) (Tubulin alpha-ubiquitous chain)	0.48	1710	1662	1576	0	no	0	21	NF	0	0	No	NA	No	0	NF	0	NF	1	extracellular exosome [GO:0070062]
Q5VTE0	A5A3E0	Putative elongation factor 1-alpha-like 3 (EF-1-alpha-like 3) (Eukaryotic elongation factor 1 A-like 3) (eEF1A-like 3) (Eukaryotic translation elongation factor 1 alpha-1 pseudogene 5)	POTE ankyrin domain family member F (ANKRD26-like family C member 1B) (Chimeric POTE-actin protein)	0.48	1465	1691	1393	0	no	1	0	NF	0	NA	NA	NA	No	0	NF	0	NF	2	extracellular space [GO:0005615];extracellular exosome [GO:0070062]
P35749	P21333	Myosin-11 (Myosin heavy chain 11) (Myosin heavy chain, smooth muscle isoform) (SMMHC)	Filamin-A (FLN-A) (Actin-binding protein 280) (ABP-280) (Alpha-filamin) (Endothelial actin-binding protein) (Filamin-1) (Non-muscle filamin)	0.48	1293	1665	1264	1	yes	7	4	R-HSA-5627123	1	0	No	NA	No	0	NF	0	NF	2	cytosol [GO:0005829];extracellular exosome [GO:0070062]
Q9BQE3	Q13509	Tubulin alpha-1C chain (Alpha-tubulin 6) (Tubulin alpha-6 chain)	Tubulin beta-3 chain (Tubulin beta-4 chain) (Tubulin beta-III)	0.48	1659	1390	1331	1	yes	22	22	R-HSA-68877;R-HSA-190861;R-HSA-5610787;R-HSA-2467813;R-HSA-6807878;R-HSA-983189;R-HSA-190840;R-HSA-1445148;R-HSA-5617833;R-HSA-437239;R-HSA-380320;R-HSA-389960;R-HSA-5620924;R-HSA-6811436;R-HSA-389957;R-HSA-6811434;R-HSA-389977;R-HSA-2500257;R-HSA-5663220;R-HSA-2132295;R-HSA-8852276;R-HSA-5626467	22	0	No	NA	No	1	microtubule-based process [GO:0007017]	3	GTPase activity [GO:0003924];structural constituent of cytoskeleton [GO:0005200];GTP binding [GO:0005525]	3	nucleus [GO:0005634];cytoplasm [GO:0005737];microtubule [GO:0005874]
Q6S8J3	Q13748	POTE ankyrin domain family member E (ANKRD26-like family C member 1A) (Prostate, ovary, testis-expressed protein on chromosome 2) (POTE-2)	Tubulin alpha-3C/D chain (Alpha-tubulin 2) (Alpha-tubulin 3C/D) (Tubulin alpha-2 chain)	0.48	1710	1599	1524	0	no	0	22	NF	0	0	No	NA	No	0	NF	0	NF	0	NF
Q13748	A5A3E0	Tubulin alpha-3C/D chain (Alpha-tubulin 2) (Alpha-tubulin 3C/D) (Tubulin alpha-2 chain)	POTE ankyrin domain family member F (ANKRD26-like family C member 1B) (Chimeric POTE-actin protein)	0.48	1599	1691	1510	0	no	22	0	NF	0	0	No	NA	No	0	NF	0	NF	0	NF
Q9H2A2	P05177	Aldehyde dehydrogenase family 8 member A1 (EC 1.2.1.-) (Aldehyde dehydrogenase 12)	Cytochrome P450 1A2 (EC 1.14.14.1) (CYPIA2) (Cholesterol 25-hydroxylase) (Cytochrome P(3)450) (Cytochrome P450 4) (Cytochrome P450-P3)	0.48	70	54	43	0	no	1	5	NF	0	0	No	NA	No	0	NF	0	NF	0	NF
Q9NY65	P68104	Tubulin alpha-8 chain (Alpha-tubulin 8) (Tubulin alpha chain-like 2)	Elongation factor 1-alpha 1 (EF-1-alpha-1) (Elongation factor Tu) (EF-Tu) (Eukaryotic elongation factor 1 A-1) (eEF1A-1) (Leukocyte receptor cluster member 7)	0.48	1528	1467	1329	0	no	19	3	NF	0	0	No	NA	No	0	NF	2	GTPase activity [GO:0003924];GTP binding [GO:0005525]	1	cytoplasm [GO:0005737]
P68104	Q9BYX7	Elongation factor 1-alpha 1 (EF-1-alpha-1) (Elongation factor Tu) (EF-Tu) (Eukaryotic elongation factor 1 A-1) (eEF1A-1) (Leukocyte receptor cluster member 7)	Putative beta-actin-like protein 3 (Kappa-actin) (POTE ankyrin domain family member K)	0.48	1467	1687	1391	0	no	3	1	NF	0	NA	NA	NA	No	0	NF	0	NF	2	cytosol [GO:0005829];extracellular exosome [GO:0070062]
P55072	P13639	Transitional endoplasmic reticulum ATPase (TER ATPase) (EC 3.6.4.6) (15S Mg(2+)-ATPase p97 subunit) (Valosin-containing protein) (VCP)	Elongation factor 2 (EF-2)	0.48	1093	1195	885	0	no	4	3	NF	0	0	No	NF	No	0	NF	1	poly(A) RNA binding [GO:0044822]	4	nucleus [GO:0005634];cytoplasm [GO:0005737];cytosol [GO:0005829];extracellular exosome [GO:0070062]
P31513	Q16696	Dimethylaniline monooxygenase [N-oxide-forming] 3 (EC 1.14.13.8) (Dimethylaniline oxidase 3) (FMO II) (FMO form 2) (Hepatic flavin-containing monooxygenase 3) (FMO 3) (Trimethylamine monooxygenase) (EC 1.14.13.148)	Cytochrome P450 2A13 (EC 1.14.14.1) (CYPIIA13)	0.48	67	58	48	0	no	2	4	NF	0	0	No	NA	No	1	xenobiotic metabolic process [GO:0006805]	0	NF	2	organelle membrane [GO:0031090];endoplasmic reticulum membrane [GO:0005789]
P05108	P05093	Cholesterol side-chain cleavage enzyme, mitochondrial (EC 1.14.15.6) (CYPXIA1) (Cholesterol desmolase) (Cytochrome P450 11A1) (Cytochrome P450(scc))	Steroid 17-alpha-hydroxylase/17,20 lyase (EC 1.14.14.19) (17-alpha-hydroxyprogesterone aldolase) (EC 4.1.2.30) (CYPXVII) (Cytochrome P450 17A1) (Cytochrome P450-C17) (Cytochrome P450c17) (Steroid 17-alpha-monooxygenase)	0.48	163	150	104	0	no	3	4	R-HSA-211976	1	0	No	NA	No	2	sterol metabolic process [GO:0016125];glucocorticoid biosynthetic process [GO:0006704]	2	heme binding [GO:0020037];iron ion binding [GO:0005506]	1	mitochondrion [GO:0005739]
P48668	P08779	Keratin, type II cytoskeletal 6C (Cytokeratin-6C) (CK-6C) (Cytokeratin-6E) (CK-6E) (Keratin K6h) (Keratin-6C) (K6C) (Type-II keratin Kb12)	Keratin, type I cytoskeletal 16 (Cytokeratin-16) (CK-16) (Keratin-16) (K16)	0.48	916	658	568	0	no	0	0	NF	0	0	No	NA	No	1	intermediate filament cytoskeleton organization [GO:0045104]	0	NF	2	intermediate filament [GO:0005882];extracellular exosome [GO:0070062]
P07437	A5A3E0	Tubulin beta chain (Tubulin beta-5 chain)	POTE ankyrin domain family member F (ANKRD26-like family C member 1B) (Chimeric POTE-actin protein)	0.48	1570	1691	1486	0	no	6	0	NF	0	0	No	NA	No	0	NF	0	NF	1	extracellular exosome [GO:0070062]
P06733	P68371	Alpha-enolase (EC 4.2.1.11) (2-phospho-D-glycerate hydro-lyase) (C-myc promoter-binding protein) (Enolase 1) (MBP-1) (MPB-1) (Non-neural enolase) (NNE) (Phosphopyruvate hydratase) (Plasminogen-binding protein)	Tubulin beta-4B chain (Tubulin beta-2 chain) (Tubulin beta-2C chain)	0.48	1341	1553	1231	0	NA	2	28	NF	0	0	No	NA	No	0	NF	0	NF	4	myelin sheath [GO:0043209];nucleus [GO:0005634];cytosol [GO:0005829];extracellular exosome [GO:0070062]
Q9NY65	Q5VTE0	Tubulin alpha-8 chain (Alpha-tubulin 8) (Tubulin alpha chain-like 2)	Putative elongation factor 1-alpha-like 3 (EF-1-alpha-like 3) (Eukaryotic elongation factor 1 A-like 3) (eEF1A-like 3) (Eukaryotic translation elongation factor 1 alpha-1 pseudogene 5)	0.48	1528	1465	1328	0	no	19	1	NF	0	NA	NA	NA	No	0	NF	2	GTPase activity [GO:0003924];GTP binding [GO:0005525]	1	cytoplasm [GO:0005737]
P68363	A5A3E0	Tubulin alpha-1B chain (Alpha-tubulin ubiquitous) (Tubulin K-alpha-1) (Tubulin alpha-ubiquitous chain)	POTE ankyrin domain family member F (ANKRD26-like family C member 1B) (Chimeric POTE-actin protein)	0.48	1662	1691	1564	0	no	21	0	NF	0	0	No	NA	No	0	NF	0	NF	1	extracellular exosome [GO:0070062]
P12259	Q13201	Coagulation factor V (Activated protein C cofactor) (Proaccelerin, labile factor) [Cleaved into: Coagulation factor V heavy chain; Coagulation factor V light chain]	Multimerin-1 (EMILIN-4) (Elastin microfibril interface located protein 4) (Elastin microfibril interfacer 4) (Endothelial cell multimerin) [Cleaved into: Platelet glycoprotein Ia*; 155 kDa platelet multimerin (p-155) (p155)]	0.48	53	115	40	0	yes	4	1	R-HSA-114608	1	0	No	NA	No	2	blood coagulation [GO:0007596];platelet degranulation [GO:0002576]	0	NF	2	extracellular region [GO:0005576];platelet alpha granule lumen [GO:0031093]
Q9BQE3	P08670	Tubulin alpha-1C chain (Alpha-tubulin 6) (Tubulin alpha-6 chain)	Vimentin	0.47	1659	1656	1521	0	NA	22	2	NF	0	0	No	NA	No	0	NF	1	structural constituent of cytoskeleton [GO:0005200]	1	cytoplasm [GO:0005737]
P68363	P68104	Tubulin alpha-1B chain (Alpha-tubulin ubiquitous) (Tubulin K-alpha-1) (Tubulin alpha-ubiquitous chain)	Elongation factor 1-alpha 1 (EF-1-alpha-1) (Elongation factor Tu) (EF-Tu) (Eukaryotic elongation factor 1 A-1) (eEF1A-1) (Leukocyte receptor cluster member 7)	0.47	1662	1467	1407	0	no	21	3	NF	0	0	No	NF	No	0	NF	2	GTPase activity [GO:0003924];GTP binding [GO:0005525]	1	extracellular exosome [GO:0070062]
P08670	P07437	Vimentin	Tubulin beta chain (Tubulin beta-5 chain)	0.47	1656	1570	1451	0	NA	2	6	NF	0	0	No	NA	No	1	movement of cell or subcellular component [GO:0006928]	1	structural constituent of cytoskeleton [GO:0005200]	3	extracellular matrix [GO:0031012];cytoskeleton [GO:0005856];extracellular exosome [GO:0070062]
P08670	P68363	Vimentin	Tubulin alpha-1B chain (Alpha-tubulin ubiquitous) (Tubulin K-alpha-1) (Tubulin alpha-ubiquitous chain)	0.47	1656	1662	1524	0	NA	2	21	NF	0	0	No	NA	No	0	NF	2	structural constituent of cytoskeleton [GO:0005200];double-stranded RNA binding [GO:0003725]	1	extracellular exosome [GO:0070062]
P07437	Q5VTE0	Tubulin beta chain (Tubulin beta-5 chain)	Putative elongation factor 1-alpha-like 3 (EF-1-alpha-like 3) (Eukaryotic elongation factor 1 A-like 3) (eEF1A-like 3) (Eukaryotic translation elongation factor 1 alpha-1 pseudogene 5)	0.47	1570	1465	1342	0	no	6	1	NF	0	NA	NA	NA	No	0	NF	2	GTPase activity [GO:0003924];GTP binding [GO:0005525]	2	nucleus [GO:0005634];extracellular exosome [GO:0070062]
P02768	P68032	Serum albumin	Actin, alpha cardiac muscle 1 (Alpha-cardiac actin)	0.47	1587	1749	1522	0	NA	7	1	NF	0	0	No	NA	Yes	1	negative regulation of apoptotic process [GO:0043066]	0	NF	3	extracellular space [GO:0005615];extracellular exosome [GO:0070062];blood microparticle [GO:0072562]
Q05639	Q9NY65	Elongation factor 1-alpha 2 (EF-1-alpha-2) (Eukaryotic elongation factor 1 A-2) (eEF1A-2) (Statin-S1)	Tubulin alpha-8 chain (Alpha-tubulin 8) (Tubulin alpha chain-like 2)	0.47	1397	1528	1269	0	no	1	19	NF	0	0	No	NA	No	0	NF	2	GTPase activity [GO:0003924];GTP binding [GO:0005525]	1	cytoplasm [GO:0005737]
P52179	P54296	Myomesin-1 (190 kDa connectin-associated protein) (190 kDa titin-associated protein) (Myomesin family member 1)	Myomesin-2 (165 kDa connectin-associated protein) (165 kDa titin-associated protein) (M-protein) (Myomesin family member 2)	0.47	207	163	145	0	no	0	0	NF	0	0	yes	NA	No	1	muscle contraction [GO:0006936]	1	structural constituent of muscle [GO:0008307]	1	M band [GO:0031430]
Q6S8J3	Q5VTE0	POTE ankyrin domain family member E (ANKRD26-like family C member 1A) (Prostate, ovary, testis-expressed protein on chromosome 2) (POTE-2)	Putative elongation factor 1-alpha-like 3 (EF-1-alpha-like 3) (Eukaryotic elongation factor 1 A-like 3) (eEF1A-like 3) (Eukaryotic translation elongation factor 1 alpha-1 pseudogene 5)	0.47	1710	1465	1405	0	no	0	1	NF	0	NA	NA	NA	No	0	NF	0	NF	2	extracellular space [GO:0005615];extracellular exosome [GO:0070062]
P07437	P68104	Tubulin beta chain (Tubulin beta-5 chain)	Elongation factor 1-alpha 1 (EF-1-alpha-1) (Elongation factor Tu) (EF-Tu) (Eukaryotic elongation factor 1 A-1) (eEF1A-1) (Leukocyte receptor cluster member 7)	0.47	1570	1467	1343	0	yes	6	3	NF	0	0	No	NF	No	0	NF	2	GTPase activity [GO:0003924];GTP binding [GO:0005525]	2	nucleus [GO:0005634];extracellular exosome [GO:0070062]
P02768	P62736	Serum albumin	Actin, aortic smooth muscle (Alpha-actin-2) (Cell growth-inhibiting gene 46 protein)	0.47	1587	1743	1518	0	NA	7	1	NF	0	0	No	NA	Yes	0	NF	0	NF	3	protein complex [GO:0043234];extracellular space [GO:0005615];extracellular exosome [GO:0070062]
Q6S8J3	P68371	POTE ankyrin domain family member E (ANKRD26-like family C member 1A) (Prostate, ovary, testis-expressed protein on chromosome 2) (POTE-2)	Tubulin beta-4B chain (Tubulin beta-2 chain) (Tubulin beta-2C chain)	0.47	1710	1553	1483	0	no	0	28	NF	0	0	No	NA	No	0	NF	0	NF	1	extracellular exosome [GO:0070062]
P68363	Q5VTE0	Tubulin alpha-1B chain (Alpha-tubulin ubiquitous) (Tubulin K-alpha-1) (Tubulin alpha-ubiquitous chain)	Putative elongation factor 1-alpha-like 3 (EF-1-alpha-like 3) (Eukaryotic elongation factor 1 A-like 3) (eEF1A-like 3) (Eukaryotic translation elongation factor 1 alpha-1 pseudogene 5)	0.47	1662	1465	1406	0	no	21	1	NF	0	NA	NA	NA	No	0	NF	2	GTPase activity [GO:0003924];GTP binding [GO:0005525]	1	extracellular exosome [GO:0070062]
P28845	P33261	Corticosteroid 11-beta-dehydrogenase isozyme 1 (EC 1.1.1.146) (11-beta-hydroxysteroid dehydrogenase 1) (11-DH) (11-beta-HSD1) (Short chain dehydrogenase/reductase family 26C member 1)	Cytochrome P450 2C19 (EC 1.14.13.-) ((R)-limonene 6-monooxygenase) (EC 1.14.13.80) ((S)-limonene 6-monooxygenase) (EC 1.14.13.48) ((S)-limonene 7-monooxygenase) (EC 1.14.13.49) (CYPIIC17) (CYPIIC19) (Cytochrome P450-11A) (Cytochrome P450-254C) (Mephenytoin 4-hydroxylase)	0.47	65	57	40	0	no	1	4	NF	0	0	No	NA	No	0	NF	0	NF	1	endoplasmic reticulum membrane [GO:0005789]
P16662	Q08AH3	UDP-glucuronosyltransferase 2B7 (UDPGT 2B7) (EC 2.4.1.17) (3,4-catechol estrogen-specific UDPGT) (UDP-glucuronosyltransferase 2B9) (UDPGT 2B9) (UDPGTh-2)	Acyl-coenzyme A synthetase ACSM2A, mitochondrial (EC 6.2.1.2) (Acyl-CoA synthetase medium-chain family member 2A) (Butyrate--CoA ligase 2A) (Butyryl-coenzyme A synthetase 2A) (Middle-chain acyl-CoA synthetase 2A)	0.47	122	129	92	0	no	1	1	NF	0	0	No	NA	No	0	NF	0	NF	0	NF
Q71U36	Q5VTE0	Tubulin alpha-1A chain (Alpha-tubulin 3) (Tubulin B-alpha-1) (Tubulin alpha-3 chain)	Putative elongation factor 1-alpha-like 3 (EF-1-alpha-like 3) (Eukaryotic elongation factor 1 A-like 3) (eEF1A-like 3) (Eukaryotic translation elongation factor 1 alpha-1 pseudogene 5)	0.47	1654	1465	1402	0	no	28	1	NF	0	NA	NA	NA	No	0	NF	2	GTPase activity [GO:0003924];GTP binding [GO:0005525]	2	nucleus [GO:0005634];extracellular exosome [GO:0070062]
Q7Z3Y8	Q7Z794	Keratin, type I cytoskeletal 27 (Cytokeratin-27) (CK-27) (Keratin-25C) (K25C) (Keratin-27) (K27) (Type I inner root sheath-specific keratin-K25irs3)	Keratin, type II cytoskeletal 1b (Cytokeratin-1B) (CK-1B) (Keratin-77) (K77) (Type-II keratin Kb39)	0.47	556	1011	502	0	no	0	0	NF	0	0	No	NA	No	0	NF	1	structural molecule activity [GO:0005198]	1	extracellular exosome [GO:0070062]
O75452	P10632	Retinol dehydrogenase 16 (EC 1.1.-.-) (Microsomal NAD(+)-dependent retinol dehydrogenase 4) (RoDH-4) (Short chain dehydrogenase/reductase family 9C member 8) (Sterol/retinol dehydrogenase)	Cytochrome P450 2C8 (EC 1.14.14.1) (CYPIIC8) (Cytochrome P450 IIC2) (Cytochrome P450 MP-12) (Cytochrome P450 MP-20) (Cytochrome P450 form 1) (S-mephenytoin 4-hydroxylase)	0.47	54	54	39	0	no	2	4	NF	0	0	No	NA	No	0	NF	0	NF	2	organelle membrane [GO:0031090];endoplasmic reticulum membrane [GO:0005789]
Q6PEY2	Q9BUF5	Tubulin alpha-3E chain (Alpha-tubulin 3E)	Tubulin beta-6 chain (Tubulin beta class V)	0.47	1579	1253	1182	0	no	19	22	R-HSA-68877;R-HSA-190861;R-HSA-2467813;R-HSA-6807878;R-HSA-983189;R-HSA-1445148;R-HSA-190840;R-HSA-5617833;R-HSA-437239;R-HSA-380320;R-HSA-389960;R-HSA-6811436;R-HSA-6811434;R-HSA-2500257;R-HSA-5663220;R-HSA-389977;R-HSA-2132295;R-HSA-8852276;R-HSA-5626467	19	0	No	NA	No	1	microtubule-based process [GO:0007017]	3	GTPase activity [GO:0003924];structural constituent of cytoskeleton [GO:0005200];GTP binding [GO:0005525]	3	nucleus [GO:0005634];cytoplasm [GO:0005737];microtubule [GO:0005874]
P02538	P08779	Keratin, type II cytoskeletal 6A (Cytokeratin-6A) (CK-6A) (Cytokeratin-6D) (CK-6D) (Keratin-6A) (K6A) (Type-II keratin Kb6) (allergen Hom s 5)	Keratin, type I cytoskeletal 16 (Cytokeratin-16) (CK-16) (Keratin-16) (K16)	0.47	918	658	567	0	no	0	0	NF	0	0	No	NA	No	1	morphogenesis of an epithelium [GO:0002009]	1	structural constituent of cytoskeleton [GO:0005200]	2	nucleus [GO:0005634];extracellular exosome [GO:0070062]
Q71U36	A5A3E0	Tubulin alpha-1A chain (Alpha-tubulin 3) (Tubulin B-alpha-1) (Tubulin alpha-3 chain)	POTE ankyrin domain family member F (ANKRD26-like family C member 1B) (Chimeric POTE-actin protein)	0.47	1654	1691	1557	0	no	28	0	NF	0	0	No	NA	No	0	NF	0	NF	1	extracellular exosome [GO:0070062]
P12110	Q9Y6C2	Collagen alpha-2(VI) chain	EMILIN-1 (Elastin microfibril interface-located protein 1) (Elastin microfibril interfacer 1)	0.47	818	743	572	0	NA	7	1	NF	0	0	No	NA	No	1	cell adhesion [GO:0007155]	0	NF	5	extracellular region [GO:0005576];extracellular matrix [GO:0031012];proteinaceous extracellular matrix [GO:0005578];collagen trimer [GO:0005581];extracellular exosome [GO:0070062]
P0CG38	Q5VTE0	POTE ankyrin domain family member I	Putative elongation factor 1-alpha-like 3 (EF-1-alpha-like 3) (Eukaryotic elongation factor 1 A-like 3) (eEF1A-like 3) (Eukaryotic translation elongation factor 1 alpha-1 pseudogene 5)	0.47	1639	1465	1359	0	no	0	1	NF	0	NA	NA	NA	No	0	NF	0	NF	2	extracellular space [GO:0005615];extracellular exosome [GO:0070062]
P0CG38	Q13748	POTE ankyrin domain family member I	Tubulin alpha-3C/D chain (Alpha-tubulin 2) (Alpha-tubulin 3C/D) (Tubulin alpha-2 chain)	0.47	1639	1599	1477	0	no	0	22	NF	0	0	No	NA	No	0	NF	0	NF	0	NF
P01834	P0CG06	Ig kappa chain C region	Ig lambda-3 chain C regions	0.47	588	544	389	0	no	14	14	R-HSA-2871796;R-HSA-2730905;R-HSA-166663;R-HSA-173623;R-HSA-2871837;R-HSA-2168880;R-HSA-2454202;R-HSA-2029485;R-HSA-5690714;R-HSA-2871809;R-HSA-198933;R-HSA-2029481;R-HSA-983695;R-HSA-2029482	14	NA	NA	NA	No	12	regulation of immune response [GO:0050776];phagocytosis, recognition [GO:0006910];complement activation, classical pathway [GO:0006958];innate immune response [GO:0045087];defense response to bacterium [GO:0042742];Fc-epsilon receptor signaling pathway [GO:0038095];phagocytosis, engulfment [GO:0006911];B cell receptor signaling pathway [GO:0050853];Fc-gamma receptor signaling pathway involved in …	3	immunoglobulin receptor binding [GO:0034987];antigen binding [GO:0003823];serine-type endopeptidase activity [GO:0004252]	6	immunoglobulin complex, circulating [GO:0042571];blood microparticle [GO:0072562];extracellular space [GO:0005615];external side of plasma membrane [GO:0009897];extracellular region [GO:0005576];plasma membrane [GO:0005886]
P33261	P05177	Cytochrome P450 2C19 (EC 1.14.13.-) ((R)-limonene 6-monooxygenase) (EC 1.14.13.80) ((S)-limonene 6-monooxygenase) (EC 1.14.13.48) ((S)-limonene 7-monooxygenase) (EC 1.14.13.49) (CYPIIC17) (CYPIIC19) (Cytochrome P450-11A) (Cytochrome P450-254C) (Mephenytoin 4-hydroxylase)	Cytochrome P450 1A2 (EC 1.14.14.1) (CYPIA2) (Cholesterol 25-hydroxylase) (Cytochrome P(3)450) (Cytochrome P450 4) (Cytochrome P450-P3)	0.47	57	54	48	0	no	4	5	R-HSA-2142816;R-HSA-2142670	2	0	No	NA	No	8	exogenous drug catabolic process [GO:0042738];oxidation-reduction process [GO:0055114];monoterpenoid metabolic process [GO:0016098];xenobiotic metabolic process [GO:0006805];drug metabolic process [GO:0017144];heterocycle metabolic process [GO:0046483];epoxygenase P450 pathway [GO:0019373];omega-hydroxylase P450 pathway [GO:0097267]	6	oxygen binding [GO:0019825];enzyme binding [GO:0019899];heme binding [GO:0020037];iron ion binding [GO:0005506];monooxygenase activity [GO:0004497];oxidoreductase activity [GO:0016491]	3	organelle membrane [GO:0031090];intracellular membrane-bounded organelle [GO:0043231];endoplasmic reticulum membrane [GO:0005789]
Q68CK6	P16662	Acyl-coenzyme A synthetase ACSM2B, mitochondrial (EC 6.2.1.2) (Acyl-CoA synthetase medium-chain family member 2B) (Butyrate--CoA ligase 2B) (Butyryl-coenzyme A synthetase 2B) (Middle-chain acyl-CoA synthetase 2B) (Xenobiotic/medium-chain fatty acid-CoA ligase HXM-A)	UDP-glucuronosyltransferase 2B7 (UDPGT 2B7) (EC 2.4.1.17) (3,4-catechol estrogen-specific UDPGT) (UDP-glucuronosyltransferase 2B9) (UDPGT 2B9) (UDPGTh-2)	0.47	132	122	96	0	no	3	1	NF	0	0	No	NA	No	0	NF	0	NF	0	NF
P01860	P01859	Ig gamma-3 chain C region (HDC) (Heavy chain disease protein)	Ig gamma-2 chain C region	0.47	473	588	369	0	no	5	5	R-HSA-173623;R-HSA-2029485;R-HSA-2029481;R-HSA-166663;R-HSA-2029482	5	NA	NA	NA	No	9	phagocytosis, recognition [GO:0006910];complement activation, classical pathway [GO:0006958];innate immune response [GO:0045087];defense response to bacterium [GO:0042742];phagocytosis, engulfment [GO:0006911];B cell receptor signaling pathway [GO:0050853];Fc-gamma receptor signaling pathway involved in phagocytosis [GO:0038096];complement activation [GO:0006956];positive regulation of B cell act…	3	immunoglobulin receptor binding [GO:0034987];antigen binding [GO:0003823];serine-type endopeptidase activity [GO:0004252]	6	immunoglobulin complex, circulating [GO:0042571];extracellular exosome [GO:0070062];blood microparticle [GO:0072562];extracellular space [GO:0005615];external side of plasma membrane [GO:0009897];extracellular region [GO:0005576]
P0CG05	B9A064	Ig lambda-2 chain C regions	Immunoglobulin lambda-like polypeptide 5 (G lambda-1) (Germline immunoglobulin lambda 1)	0.47	389	244	209	0	no	14	0	NF	0	NA	NA	NA	No	7	phagocytosis, engulfment [GO:0006911];complement activation, classical pathway [GO:0006958];innate immune response [GO:0045087];defense response to bacterium [GO:0042742];phagocytosis, recognition [GO:0006910];B cell receptor signaling pathway [GO:0050853];positive regulation of B cell activation [GO:0050871]	2	immunoglobulin receptor binding [GO:0034987];antigen binding [GO:0003823]	4	immunoglobulin complex, circulating [GO:0042571];external side of plasma membrane [GO:0009897];extracellular exosome [GO:0070062];blood microparticle [GO:0072562]
O75369	P35580	Filamin-B (FLN-B) (ABP-278) (ABP-280 homolog) (Actin-binding-like protein) (Beta-filamin) (Filamin homolog 1) (Fh1) (Filamin-3) (Thyroid autoantigen) (Truncated actin-binding protein) (Truncated ABP)	Myosin-10 (Cellular myosin heavy chain, type B) (Myosin heavy chain 10) (Myosin heavy chain, non-muscle IIb) (Non-muscle myosin heavy chain B) (NMMHC-B) (Non-muscle myosin heavy chain IIb) (NMMHC II-b) (NMMHC-IIB)	0.47	1341	1311	1108	0	NA	1	6	NF	0	0	No	NA	No	0	NF	1	actin binding [GO:0003779]	8	brush border [GO:0005903];extracellular exosome [GO:0070062];stress fiber [GO:0001725];cytoplasm [GO:0005737];actin cytoskeleton [GO:0015629];cell cortex [GO:0005938];plasma membrane [GO:0005886];cytosol [GO:0005829]
P68371	A5A3E0	Tubulin beta-4B chain (Tubulin beta-2 chain) (Tubulin beta-2C chain)	POTE ankyrin domain family member F (ANKRD26-like family C member 1B) (Chimeric POTE-actin protein)	0.47	1553	1691	1470	0	no	28	0	NF	0	0	No	NA	No	0	NF	0	NF	1	extracellular exosome [GO:0070062]
P01834	P0CG05	Ig kappa chain C region	Ig lambda-2 chain C regions	0.47	588	557	395	0	no	14	14	R-HSA-2871796;R-HSA-2730905;R-HSA-166663;R-HSA-173623;R-HSA-2871837;R-HSA-2168880;R-HSA-2454202;R-HSA-2029485;R-HSA-5690714;R-HSA-2871809;R-HSA-198933;R-HSA-2029481;R-HSA-983695;R-HSA-2029482	14	NA	NA	NA	No	12	regulation of immune response [GO:0050776];phagocytosis, recognition [GO:0006910];complement activation, classical pathway [GO:0006958];innate immune response [GO:0045087];defense response to bacterium [GO:0042742];Fc-epsilon receptor signaling pathway [GO:0038095];phagocytosis, engulfment [GO:0006911];B cell receptor signaling pathway [GO:0050853];Fc-gamma receptor signaling pathway involved in …	3	immunoglobulin receptor binding [GO:0034987];antigen binding [GO:0003823];serine-type endopeptidase activity [GO:0004252]	7	immunoglobulin complex, circulating [GO:0042571];extracellular exosome [GO:0070062];blood microparticle [GO:0072562];extracellular space [GO:0005615];external side of plasma membrane [GO:0009897];extracellular region [GO:0005576];plasma membrane [GO:0005886]
P08670	Q71U36	Vimentin	Tubulin alpha-1A chain (Alpha-tubulin 3) (Tubulin B-alpha-1) (Tubulin alpha-3 chain)	0.47	1656	1654	1518	0	NA	2	28	NF	0	0	No	NA	No	0	NF	1	structural constituent of cytoskeleton [GO:0005200]	2	cytosol [GO:0005829];extracellular exosome [GO:0070062]
P13646	P19013	Keratin, type I cytoskeletal 13 (Cytokeratin-13) (CK-13) (Keratin-13) (K13)	Keratin, type II cytoskeletal 4 (Cytokeratin-4) (CK-4) (Keratin-4) (K4) (Type-II keratin Kb4)	0.47	690	716	500	0	no	0	0	NF	0	0	No	NA	No	1	cytoskeleton organization [GO:0007010]	1	structural molecule activity [GO:0005198]	3	nucleus [GO:0005634];intermediate filament cytoskeleton [GO:0045111];keratin filament [GO:0045095]
P02768	P68133	Serum albumin	Actin, alpha skeletal muscle (Alpha-actin-1)	0.47	1587	1747	1522	0	NA	7	1	NF	0	0	No	NA	Yes	0	NF	0	NF	3	extracellular space [GO:0005615];extracellular exosome [GO:0070062];blood microparticle [GO:0072562]
P0CG38	P68104	POTE ankyrin domain family member I	Elongation factor 1-alpha 1 (EF-1-alpha-1) (Elongation factor Tu) (EF-Tu) (Eukaryotic elongation factor 1 A-1) (eEF1A-1) (Leukocyte receptor cluster member 7)	0.47	1639	1467	1361	0	no	0	3	NF	0	0	No	NA	No	0	NF	0	NF	2	extracellular space [GO:0005615];extracellular exosome [GO:0070062]
Q9Y2P5	P11712	Bile acyl-CoA synthetase (BACS) (EC 6.2.1.7) (Bile acid-CoA ligase) (BA-CoA ligase) (BAL) (Cholate--CoA ligase) (Fatty acid transport protein 5) (FATP-5) (Fatty-acid-coenzyme A ligase, very long-chain 3) (Solute carrier family 27 member 5) (Very long-chain acyl-CoA synthetase homolog 2) (VLCS-H2) (VLCSH2) (Very long-chain acyl-CoA synthetase-related protein) (VLACS-related) (VLACSR)	Cytochrome P450 2C9 (EC 1.14.13.-) ((R)-limonene 6-monooxygenase) (EC 1.14.13.80) ((S)-limonene 6-monooxygenase) (EC 1.14.13.48) ((S)-limonene 7-monooxygenase) (EC 1.14.13.49) (CYPIIC9) (Cholesterol 25-hydroxylase) (EC 1.14.99.38) (Cytochrome P-450MP) (Cytochrome P450 MP-4) (Cytochrome P450 MP-8) (Cytochrome P450 PB-1) (S-mephenytoin 4-hydroxylase)	0.47	78	60	53	0	no	3	4	NF	0	0	No	NA	No	0	NF	0	NF	1	endoplasmic reticulum membrane [GO:0005789]
P0CG38	Q9NY65	POTE ankyrin domain family member I	Tubulin alpha-8 chain (Alpha-tubulin 8) (Tubulin alpha chain-like 2)	0.46	1639	1528	1414	0	no	0	19	NF	0	0	No	NA	No	0	NF	0	NF	0	NF
Q9BQE3	Q9BYX7	Tubulin alpha-1C chain (Alpha-tubulin 6) (Tubulin alpha-6 chain)	Putative beta-actin-like protein 3 (Kappa-actin) (POTE ankyrin domain family member K)	0.46	1659	1687	1560	0	no	22	1	NF	0	NA	NA	NA	No	0	NF	0	NF	0	NF
Q9BVA1	P06733	Tubulin beta-2B chain	Alpha-enolase (EC 4.2.1.11) (2-phospho-D-glycerate hydro-lyase) (C-myc promoter-binding protein) (Enolase 1) (MBP-1) (MPB-1) (Non-neural enolase) (NNE) (Phosphopyruvate hydratase) (Plasminogen-binding protein)	0.46	1478	1341	1179	0	NA	22	2	NF	0	0	No	NA	No	0	NF	0	NF	2	nucleus [GO:0005634];cytoplasm [GO:0005737]
P12035	P08779	Keratin, type II cytoskeletal 3 (65 kDa cytokeratin) (Cytokeratin-3) (CK-3) (Keratin-3) (K3) (Type-II keratin Kb3)	Keratin, type I cytoskeletal 16 (Cytokeratin-16) (CK-16) (Keratin-16) (K16)	0.46	650	658	467	0	no	0	0	NF	0	0	No	NA	No	1	intermediate filament cytoskeleton organization [GO:0045104]	0	NF	2	intermediate filament [GO:0005882];extracellular exosome [GO:0070062]
Q9UIW2	Q9HCM2	Plexin-A1 (Semaphorin receptor NOV)	Plexin-A4	0.46	59	54	26	0	NA	4	4	R-HSA-416700;R-HSA-399954;R-HSA-399955;R-HSA-399956	4	0	yes	NF	No	4	branchiomotor neuron axon guidance [GO:0021785];semaphorin-plexin signaling pathway involved in axon guidance [GO:1902287];regulation of cell migration [GO:0030334];regulation of axon extension involved in axon guidance [GO:0048841]	1	semaphorin receptor activity [GO:0017154]	3	integral component of plasma membrane [GO:0005887];plasma membrane [GO:0005886];semaphorin receptor complex [GO:0002116]
P68371	Q5VTE0	Tubulin beta-4B chain (Tubulin beta-2 chain) (Tubulin beta-2C chain)	Putative elongation factor 1-alpha-like 3 (EF-1-alpha-like 3) (Eukaryotic elongation factor 1 A-like 3) (eEF1A-like 3) (Eukaryotic translation elongation factor 1 alpha-1 pseudogene 5)	0.46	1553	1465	1328	0	no	28	1	NF	0	NA	NA	NA	No	0	NF	2	GTPase activity [GO:0003924];GTP binding [GO:0005525]	2	nucleus [GO:0005634];extracellular exosome [GO:0070062]
P68363	Q9BYX7	Tubulin alpha-1B chain (Alpha-tubulin ubiquitous) (Tubulin K-alpha-1) (Tubulin alpha-ubiquitous chain)	Putative beta-actin-like protein 3 (Kappa-actin) (POTE ankyrin domain family member K)	0.46	1662	1687	1560	0	no	21	1	NF	0	NA	NA	NA	No	0	NF	0	NF	1	extracellular exosome [GO:0070062]
P0CF74	P0CG04	Ig lambda-6 chain C region	Ig lambda-1 chain C regions	0.46	224	219	159	0	no	14	14	R-HSA-2871796;R-HSA-2730905;R-HSA-166663;R-HSA-173623;R-HSA-2871837;R-HSA-2168880;R-HSA-2454202;R-HSA-2029485;R-HSA-5690714;R-HSA-2871809;R-HSA-198933;R-HSA-2029481;R-HSA-983695;R-HSA-2029482	14	NA	NA	NA	No	12	regulation of immune response [GO:0050776];phagocytosis, recognition [GO:0006910];complement activation, classical pathway [GO:0006958];innate immune response [GO:0045087];defense response to bacterium [GO:0042742];Fc-epsilon receptor signaling pathway [GO:0038095];phagocytosis, engulfment [GO:0006911];B cell receptor signaling pathway [GO:0050853];Fc-gamma receptor signaling pathway involved in …	3	immunoglobulin receptor binding [GO:0034987];antigen binding [GO:0003823];serine-type endopeptidase activity [GO:0004252]	6	immunoglobulin complex, circulating [GO:0042571];blood microparticle [GO:0072562];extracellular space [GO:0005615];external side of plasma membrane [GO:0009897];extracellular region [GO:0005576];plasma membrane [GO:0005886]
P68371	P06576	Tubulin beta-4B chain (Tubulin beta-2 chain) (Tubulin beta-2C chain)	ATP synthase subunit beta, mitochondrial (EC 3.6.3.14)	0.46	1553	1229	1142	0	no	28	3	NF	0	0	No	NA	No	0	NF	1	MHC class I protein binding [GO:0042288]	4	nucleus [GO:0005634];extracellular matrix [GO:0031012];extracellular exosome [GO:0070062];myelin sheath [GO:0043209]
Q9NY65	Q9BYX7	Tubulin alpha-8 chain (Alpha-tubulin 8) (Tubulin alpha chain-like 2)	Putative beta-actin-like protein 3 (Kappa-actin) (POTE ankyrin domain family member K)	0.46	1528	1687	1440	0	no	19	1	NF	0	NA	NA	NA	No	0	NF	0	NF	0	NF
P68366	A5A3E0	Tubulin alpha-4A chain (Alpha-tubulin 1) (Testis-specific alpha-tubulin) (Tubulin H2-alpha) (Tubulin alpha-1 chain)	POTE ankyrin domain family member F (ANKRD26-like family C member 1B) (Chimeric POTE-actin protein)	0.46	1599	1691	1503	0	no	29	0	NF	0	0	No	NA	No	0	NF	0	NF	1	extracellular exosome [GO:0070062]
P02768	P63267	Serum albumin	Actin, gamma-enteric smooth muscle (Alpha-actin-3) (Gamma-2-actin) (Smooth muscle gamma-actin)	0.46	1587	1742	1517	0	NA	7	1	NF	0	0	No	NA	Yes	0	NF	0	NF	3	extracellular space [GO:0005615];extracellular exosome [GO:0070062];blood microparticle [GO:0072562]
P68371	P68104	Tubulin beta-4B chain (Tubulin beta-2 chain) (Tubulin beta-2C chain)	Elongation factor 1-alpha 1 (EF-1-alpha-1) (Elongation factor Tu) (EF-Tu) (Eukaryotic elongation factor 1 A-1) (eEF1A-1) (Leukocyte receptor cluster member 7)	0.46	1553	1467	1329	0	no	28	3	NF	0	0	No	NA	No	0	NF	2	GTPase activity [GO:0003924];GTP binding [GO:0005525]	3	nucleus [GO:0005634];cytosol [GO:0005829];extracellular exosome [GO:0070062]
P13647	P02538	Keratin, type II cytoskeletal 5 (58 kDa cytokeratin) (Cytokeratin-5) (CK-5) (Keratin-5) (K5) (Type-II keratin Kb5)	Keratin, type II cytoskeletal 6A (Cytokeratin-6A) (CK-6A) (Cytokeratin-6D) (CK-6D) (Keratin-6A) (K6A) (Type-II keratin Kb6) (allergen Hom s 5)	0.46	443	496	337	0	no	1	0	NF	0	0	yes	NA	No	0	NF	1	structural constituent of cytoskeleton [GO:0005200]	4	nucleus [GO:0005634];keratin filament [GO:0045095];extracellular exosome [GO:0070062];membrane [GO:0016020]
P08133	P11021	Annexin A6 (67 kDa calelectrin) (Annexin VI) (Annexin-6) (Calphobindin-II) (CPB-II) (Chromobindin-20) (Lipocortin VI) (Protein III) (p68) (p70)	78 kDa glucose-regulated protein (GRP-78) (Endoplasmic reticulum lumenal Ca(2+)-binding protein grp78) (Heat shock 70 kDa protein 5) (Immunoglobulin heavy chain-binding protein) (BiP)	0.46	1249	1404	1103	0	no	1	7	NF	0	0	No	NF	No	0	NF	1	calcium ion binding [GO:0005509]	6	extracellular exosome [GO:0070062];mitochondrion [GO:0005739];focal adhesion [GO:0005925];membrane [GO:0016020];melanosome [GO:0042470];nucleus [GO:0005634]
Q13813	Q15149	Spectrin alpha chain, non-erythrocytic 1 (Alpha-II spectrin) (Fodrin alpha chain) (Spectrin, non-erythroid alpha subunit)	Plectin (PCN) (PLTN) (Hemidesmosomal protein 1) (HD1) (Plectin-1)	0.46	1227	1387	1130	0	NA	6	3	R-HSA-264870	1	0	No	NA	No	0	NF	1	cadherin binding involved in cell-cell adhesion [GO:0098641]	4	cell-cell adherens junction [GO:0005913];plasma membrane [GO:0005886];cytosol [GO:0005829];extracellular exosome [GO:0070062]
P10632	P33261	Cytochrome P450 2C8 (EC 1.14.14.1) (CYPIIC8) (Cytochrome P450 IIC2) (Cytochrome P450 MP-12) (Cytochrome P450 MP-20) (Cytochrome P450 form 1) (S-mephenytoin 4-hydroxylase)	Cytochrome P450 2C19 (EC 1.14.13.-) ((R)-limonene 6-monooxygenase) (EC 1.14.13.80) ((S)-limonene 6-monooxygenase) (EC 1.14.13.48) ((S)-limonene 7-monooxygenase) (EC 1.14.13.49) (CYPIIC17) (CYPIIC19) (Cytochrome P450-11A) (Cytochrome P450-254C) (Mephenytoin 4-hydroxylase)	0.46	49	55	42	0	no	4	4	R-HSA-211981;R-HSA-2142816;R-HSA-2142670;R-HSA-211999	4	0	yes	NA	No	6	exogenous drug catabolic process [GO:0042738];oxidation-reduction process [GO:0055114];xenobiotic metabolic process [GO:0006805];drug metabolic process [GO:0017144];epoxygenase P450 pathway [GO:0019373];omega-hydroxylase P450 pathway [GO:0097267]	6	oxygen binding [GO:0019825];arachidonic acid epoxygenase activity [GO:0008392];heme binding [GO:0020037];iron ion binding [GO:0005506];monooxygenase activity [GO:0004497];steroid hydroxylase activity [GO:0008395]	2	organelle membrane [GO:0031090];endoplasmic reticulum membrane [GO:0005789]
P05181	O75452	Cytochrome P450 2E1 (EC 1.14.13.-) (4-nitrophenol 2-hydroxylase) (EC 1.14.13.n7) (CYPIIE1) (Cytochrome P450-J) [Cleaved into: Cytochrome P450 2E1, N-terminally processed]	Retinol dehydrogenase 16 (EC 1.1.-.-) (Microsomal NAD(+)-dependent retinol dehydrogenase 4) (RoDH-4) (Short chain dehydrogenase/reductase family 9C member 8) (Sterol/retinol dehydrogenase)	0.46	57	54	42	0	no	2	2	NF	0	0	No	NA	No	0	NF	0	NF	1	endoplasmic reticulum membrane [GO:0005789]
P33261	Q16696	Cytochrome P450 2C19 (EC 1.14.13.-) ((R)-limonene 6-monooxygenase) (EC 1.14.13.80) ((S)-limonene 6-monooxygenase) (EC 1.14.13.48) ((S)-limonene 7-monooxygenase) (EC 1.14.13.49) (CYPIIC17) (CYPIIC19) (Cytochrome P450-11A) (Cytochrome P450-254C) (Mephenytoin 4-hydroxylase)	Cytochrome P450 2A13 (EC 1.14.14.1) (CYPIIA13)	0.46	57	58	48	0	no	4	4	R-HSA-211981;R-HSA-211999	2	0	yes	NA	No	2	xenobiotic metabolic process [GO:0006805];epoxygenase P450 pathway [GO:0019373]	5	heme binding [GO:0020037];steroid hydroxylase activity [GO:0008395];iron ion binding [GO:0005506];oxygen binding [GO:0019825];arachidonic acid epoxygenase activity [GO:0008392]	2	organelle membrane [GO:0031090];endoplasmic reticulum membrane [GO:0005789]
P0CG04	P0CG06	Ig lambda-1 chain C regions	Ig lambda-3 chain C regions	0.46	214	374	194	0	no	14	14	R-HSA-2871796;R-HSA-2730905;R-HSA-166663;R-HSA-173623;R-HSA-2871837;R-HSA-2168880;R-HSA-2454202;R-HSA-2029485;R-HSA-5690714;R-HSA-2871809;R-HSA-198933;R-HSA-2029481;R-HSA-983695;R-HSA-2029482	14	NA	NA	NA	No	12	regulation of immune response [GO:0050776];phagocytosis, recognition [GO:0006910];complement activation, classical pathway [GO:0006958];innate immune response [GO:0045087];defense response to bacterium [GO:0042742];Fc-epsilon receptor signaling pathway [GO:0038095];phagocytosis, engulfment [GO:0006911];B cell receptor signaling pathway [GO:0050853];Fc-gamma receptor signaling pathway involved in …	3	immunoglobulin receptor binding [GO:0034987];antigen binding [GO:0003823];serine-type endopeptidase activity [GO:0004252]	6	immunoglobulin complex, circulating [GO:0042571];blood microparticle [GO:0072562];extracellular space [GO:0005615];external side of plasma membrane [GO:0009897];extracellular region [GO:0005576];plasma membrane [GO:0005886]
P08670	P63261	Vimentin	Actin, cytoplasmic 2 (Gamma-actin) [Cleaved into: Actin, cytoplasmic 2, N-terminally processed]	0.46	1656	1790	1619	0	NA	2	15	NF	0	0	No	NA	No	1	movement of cell or subcellular component [GO:0006928]	2	identical protein binding [GO:0042802];structural constituent of cytoskeleton [GO:0005200]	6	extracellular matrix [GO:0031012];extracellular exosome [GO:0070062];cytosol [GO:0005829];focal adhesion [GO:0005925];plasma membrane [GO:0005886];cytoskeleton [GO:0005856]
Q6S8J3	P68366	POTE ankyrin domain family member E (ANKRD26-like family C member 1A) (Prostate, ovary, testis-expressed protein on chromosome 2) (POTE-2)	Tubulin alpha-4A chain (Alpha-tubulin 1) (Testis-specific alpha-tubulin) (Tubulin H2-alpha) (Tubulin alpha-1 chain)	0.46	1710	1599	1515	0	no	0	29	NF	0	0	No	NA	No	0	NF	0	NF	1	extracellular exosome [GO:0070062]
P55072	P14625	Transitional endoplasmic reticulum ATPase (TER ATPase) (EC 3.6.4.6) (15S Mg(2+)-ATPase p97 subunit) (Valosin-containing protein) (VCP)	Endoplasmin (94 kDa glucose-regulated protein) (GRP-94) (Heat shock protein 90 kDa beta member 1) (Tumor rejection antigen 1) (gp96 homolog)	0.46	1093	1266	914	0	yes	4	3	NF	0	0	No	NA	No	2	ER-associated ubiquitin-dependent protein catabolic process [GO:0030433];retrograde protein transport, ER to cytosol [GO:0030970]	2	protein phosphatase binding [GO:0019903];ATP binding [GO:0005524]	6	cytosol [GO:0005829];endoplasmic reticulum [GO:0005783];endoplasmic reticulum membrane [GO:0005789];perinuclear region of cytoplasm [GO:0048471];nucleus [GO:0005634];extracellular exosome [GO:0070062]
Q01546	P08779	Keratin, type II cytoskeletal 2 oral (Cytokeratin-2P) (CK-2P) (K2P) (Keratin-76) (K76) (Type-II keratin Kb9)	Keratin, type I cytoskeletal 16 (Cytokeratin-16) (CK-16) (Keratin-16) (K16)	0.46	689	658	486	0	no	0	0	NF	0	0	No	NA	No	2	cytoskeleton organization [GO:0007010];epidermis development [GO:0008544]	0	NF	3	intermediate filament [GO:0005882];nucleus [GO:0005634];extracellular exosome [GO:0070062]
P60709	P08670	Actin, cytoplasmic 1 (Beta-actin) [Cleaved into: Actin, cytoplasmic 1, N-terminally processed]	Vimentin	0.46	1790	1656	1619	1	NA	21	2	NF	0	0	No	NA	No	1	movement of cell or subcellular component [GO:0006928]	2	identical protein binding [GO:0042802];structural constituent of cytoskeleton [GO:0005200]	6	extracellular exosome [GO:0070062];cytoplasm [GO:0005737];cytosol [GO:0005829];focal adhesion [GO:0005925];plasma membrane [GO:0005886];cytoskeleton [GO:0005856]
P07437	Q9BYX7	Tubulin beta chain (Tubulin beta-5 chain)	Putative beta-actin-like protein 3 (Kappa-actin) (POTE ankyrin domain family member K)	0.46	1570	1687	1480	0	no	6	1	NF	0	NA	NA	NA	No	0	NF	0	NF	3	extracellular region [GO:0005576];cytoskeleton [GO:0005856];extracellular exosome [GO:0070062]
P98160	P12111	Basement membrane-specific heparan sulfate proteoglycan core protein (HSPG) (Perlecan) (PLC) [Cleaved into: Endorepellin; LG3 peptide]	Collagen alpha-3(VI) chain	0.46	965	1125	920	0	NA	15	7	R-HSA-216083	1	0	No	NA	No	1	extracellular matrix organization [GO:0030198]	0	NF	4	extracellular region [GO:0005576];extracellular matrix [GO:0031012];extracellular space [GO:0005615];extracellular exosome [GO:0070062]
P13646	P12035	Keratin, type I cytoskeletal 13 (Cytokeratin-13) (CK-13) (Keratin-13) (K13)	Keratin, type II cytoskeletal 3 (65 kDa cytokeratin) (Cytokeratin-3) (CK-3) (Keratin-3) (K3) (Type-II keratin Kb3)	0.46	690	650	478	0	no	0	0	NF	0	0	No	NA	No	0	NF	1	structural molecule activity [GO:0005198]	2	keratin filament [GO:0045095];extracellular exosome [GO:0070062]
P68366	Q9BYX7	Tubulin alpha-4A chain (Alpha-tubulin 1) (Testis-specific alpha-tubulin) (Tubulin H2-alpha) (Tubulin alpha-1 chain)	Putative beta-actin-like protein 3 (Kappa-actin) (POTE ankyrin domain family member K)	0.46	1599	1687	1500	0	no	29	1	R-HSA-114608	1	NA	NA	NA	No	1	platelet degranulation [GO:0002576]	0	NF	3	extracellular region [GO:0005576];cytosol [GO:0005829];extracellular exosome [GO:0070062]
P00338	P21796	L-lactate dehydrogenase A chain (LDH-A) (EC 1.1.1.27) (Cell proliferation-inducing gene 19 protein) (LDH muscle subunit) (LDH-M) (Renal carcinoma antigen NY-REN-59)	Voltage-dependent anion-selective channel protein 1 (VDAC-1) (hVDAC1) (Outer mitochondrial membrane protein porin 1) (Plasmalemmal porin) (Porin 31HL) (Porin 31HM)	0.46	1044	860	714	0	NA	1	2	NF	0	0	No	NA	No	0	NF	0	NF	3	nucleus [GO:0005634];extracellular exosome [GO:0070062];membrane [GO:0016020]
P35749	P12111	Myosin-11 (Myosin heavy chain 11) (Myosin heavy chain, smooth muscle isoform) (SMMHC)	Collagen alpha-3(VI) chain	0.46	1293	1125	916	0	NA	7	7	NF	0	0	No	NA	No	0	NF	0	NF	1	extracellular exosome [GO:0070062]
P16499	P35913	Rod cGMP-specific 3',5'-cyclic phosphodiesterase subunit alpha (GMP-PDE alpha) (EC 3.1.4.35) (PDE V-B1)	Rod cGMP-specific 3',5'-cyclic phosphodiesterase subunit beta (GMP-PDE beta) (EC 3.1.4.35)	0.46	28	23	19	0	no	3	3	R-HSA-2485179;R-HSA-2514859;R-HSA-4086398	3	0	yes	NA	No	6	visual perception [GO:0007601];rhodopsin mediated signaling pathway [GO:0016056];Wnt signaling pathway, calcium modulating pathway [GO:0007223];regulation of rhodopsin mediated signaling pathway [GO:0022400];regulation of cytosolic calcium ion concentration [GO:0051480];GMP metabolic process [GO:0046037]	2	3',5'-cyclic-GMP phosphodiesterase activity [GO:0047555];metal ion binding [GO:0046872]	2	photoreceptor disc membrane [GO:0097381];plasma membrane [GO:0005886]
O95678	Q04695	Keratin, type II cytoskeletal 75 (Cytokeratin-75) (CK-75) (Keratin-6 hair follicle) (hK6hf) (Keratin-75) (K75) (Type II keratin-K6hf) (Type-II keratin Kb18)	Keratin, type I cytoskeletal 17 (39.1) (Cytokeratin-17) (CK-17) (Keratin-17) (K17)	0.46	819	624	488	0	NA	0	0	NF	0	0	No	NA	No	0	NF	0	NF	2	intermediate filament [GO:0005882];extracellular exosome [GO:0070062]
P78363	Q9BZV3	Retinal-specific ATP-binding cassette transporter (ATP-binding cassette sub-family A member 4) (RIM ABC transporter) (RIM protein) (RmP) (Stargardt disease protein)	Interphotoreceptor matrix proteoglycan 2 (Interphotoreceptor matrix proteoglycan of 200 kDa) (IPM 200) (Sialoprotein associated with cones and rods proteoglycan) (Spacrcan)	0.46	27	29	21	0	no	3	0	NF	0	0	No	NA	No	1	visual perception [GO:0007601]	0	NF	0	NF
Q71U36	Q9BYX7	Tubulin alpha-1A chain (Alpha-tubulin 3) (Tubulin B-alpha-1) (Tubulin alpha-3 chain)	Putative beta-actin-like protein 3 (Kappa-actin) (POTE ankyrin domain family member K)	0.46	1654	1687	1555	0	no	28	1	NF	0	NA	NA	NA	No	0	NF	0	NF	2	cytosol [GO:0005829];extracellular exosome [GO:0070062]
P68371	Q9BYX7	Tubulin beta-4B chain (Tubulin beta-2 chain) (Tubulin beta-2C chain)	Putative beta-actin-like protein 3 (Kappa-actin) (POTE ankyrin domain family member K)	0.46	1553	1687	1464	0	no	28	1	NF	0	NA	NA	NA	No	0	NF	0	NF	3	extracellular exosome [GO:0070062];cytoskeleton [GO:0005856];cytosol [GO:0005829]
P15085	P15086	Carboxypeptidase A1 (EC 3.4.17.1)	Carboxypeptidase B (EC 3.4.17.2) (Pancreas-specific protein) (PASP)	0.45	47	40	27	0	no	0	1	NF	0	0	yes	NA	No	0	NF	2	zinc ion binding [GO:0008270];metallocarboxypeptidase activity [GO:0004181]	1	extracellular space [GO:0005615]
Q96A08	P68431	Histone H2B type 1-A (Histone H2B, testis) (TSH2B.1) (Testis-specific histone H2B)	Histone H3.1 (Histone H3/a) (Histone H3/b) (Histone H3/c) (Histone H3/d) (Histone H3/f) (Histone H3/h) (Histone H3/i) (Histone H3/j) (Histone H3/k) (Histone H3/l)	0.45	1071	831	681	0	NA	27	24	R-HSA-5617472;R-HSA-73777;R-HSA-3214847;R-HSA-977225;R-HSA-427413;R-HSA-5625886;R-HSA-5334118;R-HSA-5578749;R-HSA-912446;R-HSA-3214815;R-HSA-201722;R-HSA-2559582;R-HSA-212300;R-HSA-2559580;R-HSA-73728;R-HSA-427359;R-HSA-2299718;R-HSA-427389;R-HSA-5250924	19	0	No	NA	No	1	nucleosome assembly [GO:0006334]	1	DNA binding [GO:0003677]	5	nuclear chromosome, telomeric region [GO:0000784];nucleus [GO:0005634];nuclear nucleosome [GO:0000788];nucleoplasm [GO:0005654];nucleosome [GO:0000786]
P04259	P08779	Keratin, type II cytoskeletal 6B (Cytokeratin-6B) (CK-6B) (Keratin-6B) (K6B) (Type-II keratin Kb10)	Keratin, type I cytoskeletal 16 (Cytokeratin-16) (CK-16) (Keratin-16) (K16)	0.45	975	658	582	0	no	0	0	NF	0	0	No	NA	No	0	NF	1	structural constituent of cytoskeleton [GO:0005200]	1	extracellular exosome [GO:0070062]
Q04695	P12035	Keratin, type I cytoskeletal 17 (39.1) (Cytokeratin-17) (CK-17) (Keratin-17) (K17)	Keratin, type II cytoskeletal 3 (65 kDa cytokeratin) (Cytokeratin-3) (CK-3) (Keratin-3) (K3) (Type-II keratin Kb3)	0.45	624	650	429	0	NA	0	0	NF	0	0	No	NA	No	0	NF	0	NF	2	intermediate filament [GO:0005882];extracellular exosome [GO:0070062]
P07237	P30101	Protein disulfide-isomerase (PDI) (EC 5.3.4.1) (Cellular thyroid hormone-binding protein) (Prolyl 4-hydroxylase subunit beta) (p55)	Protein disulfide-isomerase A3 (EC 5.3.4.1) (58 kDa glucose-regulated protein) (58 kDa microsomal protein) (p58) (Disulfide isomerase ER-60) (Endoplasmic reticulum resident protein 57) (ER protein 57) (ERp57) (Endoplasmic reticulum resident protein 60) (ER protein 60) (ERp60)	0.45	997	1086	820	1	yes	4	3	NF	0	0	yes	NF	No	3	protein folding [GO:0006457];response to endoplasmic reticulum stress [GO:0034976];cell redox homeostasis [GO:0045454]	2	poly(A) RNA binding [GO:0044822];protein disulfide isomerase activity [GO:0003756]	5	endoplasmic reticulum lumen [GO:0005788];focal adhesion [GO:0005925];endoplasmic reticulum [GO:0005783];extracellular exosome [GO:0070062];melanosome [GO:0042470]
Q9Y623	Q14896	Myosin-4 (Myosin heavy chain 2b) (MyHC-2b) (Myosin heavy chain 4) (Myosin heavy chain IIb) (MyHC-IIb) (Myosin heavy chain, skeletal muscle, fetal)	Myosin-binding protein C, cardiac-type (Cardiac MyBP-C) (C-protein, cardiac muscle isoform)	0.45	377	193	189	0	no	1	1	NF	0	0	No	NA	No	1	muscle filament sliding [GO:0030049]	0	NF	1	sarcomere [GO:0030017]
Q01082	Q15149	Spectrin beta chain, non-erythrocytic 1 (Beta-II spectrin) (Fodrin beta chain) (Spectrin, non-erythroid beta chain 1)	Plectin (PCN) (PLTN) (Hemidesmosomal protein 1) (HD1) (Plectin-1)	0.45	1259	1387	1164	0	NA	5	3	NF	0	0	No	NA	No	0	NF	3	ankyrin binding [GO:0030506];poly(A) RNA binding [GO:0044822];cadherin binding involved in cell-cell adhesion [GO:0098641]	4	cell-cell adherens junction [GO:0005913];cytoplasm [GO:0005737];cytosol [GO:0005829];extracellular exosome [GO:0070062]
P13639	P14625	Elongation factor 2 (EF-2)	Endoplasmin (94 kDa glucose-regulated protein) (GRP-94) (Heat shock protein 90 kDa beta member 1) (Tumor rejection antigen 1) (gp96 homolog)	0.45	1195	1266	967	0	no	3	3	NF	0	0	No	NA	No	1	response to endoplasmic reticulum stress [GO:0034976]	0	NF	6	extracellular matrix [GO:0031012];cytosol [GO:0005829];membrane [GO:0016020];nucleus [GO:0005634];plasma membrane [GO:0005886];extracellular exosome [GO:0070062]
P51149	Q9H0U4	Ras-related protein Rab-7a	Ras-related protein Rab-1B	0.45	632	783	489	0	yes	1	4	NF	0	0	No	NA	No	3	regulation of autophagosome assembly [GO:2000785];small GTPase mediated signal transduction [GO:0007264];protein transport [GO:0015031]	1	GTP binding [GO:0005525]	3	pre-autophagosomal structure membrane [GO:0034045];extracellular exosome [GO:0070062];Golgi apparatus [GO:0005794]
P06733	Q5VTE0	Alpha-enolase (EC 4.2.1.11) (2-phospho-D-glycerate hydro-lyase) (C-myc promoter-binding protein) (Enolase 1) (MBP-1) (MPB-1) (Non-neural enolase) (NNE) (Phosphopyruvate hydratase) (Plasminogen-binding protein)	Putative elongation factor 1-alpha-like 3 (EF-1-alpha-like 3) (Eukaryotic elongation factor 1 A-like 3) (eEF1A-like 3) (Eukaryotic translation elongation factor 1 alpha-1 pseudogene 5)	0.45	1341	1465	1142	0	NA	2	1	NF	0	NA	NA	NA	No	0	NF	0	NF	4	nucleus [GO:0005634];extracellular space [GO:0005615];cytoplasm [GO:0005737];extracellular exosome [GO:0070062]
P04350	P06576	Tubulin beta-4A chain (Tubulin 5 beta) (Tubulin beta-4 chain)	ATP synthase subunit beta, mitochondrial (EC 3.6.3.14)	0.45	1415	1229	1060	0	no	28	3	NF	0	0	No	NA	No	0	NF	0	NF	3	nucleus [GO:0005634];extracellular exosome [GO:0070062];myelin sheath [GO:0043209]
P0CG06	B9A064	Ig lambda-3 chain C regions	Immunoglobulin lambda-like polypeptide 5 (G lambda-1) (Germline immunoglobulin lambda 1)	0.45	374	245	205	0	no	14	0	NF	0	NA	NA	NA	No	7	phagocytosis, engulfment [GO:0006911];complement activation, classical pathway [GO:0006958];innate immune response [GO:0045087];defense response to bacterium [GO:0042742];phagocytosis, recognition [GO:0006910];B cell receptor signaling pathway [GO:0050853];positive regulation of B cell activation [GO:0050871]	2	immunoglobulin receptor binding [GO:0034987];antigen binding [GO:0003823]	3	immunoglobulin complex, circulating [GO:0042571];external side of plasma membrane [GO:0009897];blood microparticle [GO:0072562]
P20700	Q03252	Lamin-B1	Lamin-B2	0.45	822	837	603	0	no	6	0	NF	0	0	yes	NA	No	1		1	structural molecule activity [GO:0005198]	2	nuclear inner membrane [GO:0005637];lamin filament [GO:0005638]
P12111	P21333	Collagen alpha-3(VI) chain	Filamin-A (FLN-A) (Actin-binding protein 280) (ABP-280) (Alpha-filamin) (Endothelial actin-binding protein) (Filamin-1) (Non-muscle filamin)	0.45	1125	1665	1074	0	NA	7	4	NF	0	0	No	NA	No	0	NF	0	NF	3	extracellular region [GO:0005576];extracellular matrix [GO:0031012];extracellular exosome [GO:0070062]
Q9NY65	A5A3E0	Tubulin alpha-8 chain (Alpha-tubulin 8) (Tubulin alpha chain-like 2)	POTE ankyrin domain family member F (ANKRD26-like family C member 1B) (Chimeric POTE-actin protein)	0.45	1528	1691	1444	0	no	19	0	NF	0	0	No	NA	No	0	NF	0	NF	0	NF
P08133	P26038	Annexin A6 (67 kDa calelectrin) (Annexin VI) (Annexin-6) (Calphobindin-II) (CPB-II) (Chromobindin-20) (Lipocortin VI) (Protein III) (p68) (p70)	Moesin (Membrane-organizing extension spike protein)	0.45	1249	1242	1023	0	no	1	1	NF	0	0	No	NA	No	0	NF	0	NF	5	focal adhesion [GO:0005925];nucleus [GO:0005634];extracellular exosome [GO:0070062];apical plasma membrane [GO:0016324];perinuclear region of cytoplasm [GO:0048471]
P0CG39	P0CG48	POTE ankyrin domain family member J	Polyubiquitin-C [Cleaved into: Ubiquitin]	0.45	1552	1428	1265	0	NA	0	139	NF	0	0	No	NA	No	0	NF	0	NF	2	extracellular space [GO:0005615];extracellular exosome [GO:0070062]
P07437	P06576	Tubulin beta chain (Tubulin beta-5 chain)	ATP synthase subunit beta, mitochondrial (EC 3.6.3.14)	0.45	1570	1229	1145	0	yes	6	3	NF	0	0	No	NF	No	0	NF	1	MHC class I protein binding [GO:0042288]	3	nucleus [GO:0005634];extracellular matrix [GO:0031012];extracellular exosome [GO:0070062]
P08670	P68032	Vimentin	Actin, alpha cardiac muscle 1 (Alpha-cardiac actin)	0.45	1656	1749	1582	0	NA	2	1	R-HSA-390522	1	0	No	NA	No	2	muscle filament sliding [GO:0030049];positive regulation of gene expression [GO:0010628]	0	NF	4	focal adhesion [GO:0005925];cytoplasm [GO:0005737];cytosol [GO:0005829];extracellular exosome [GO:0070062]
P08670	P68133	Vimentin	Actin, alpha skeletal muscle (Alpha-actin-1)	0.45	1656	1747	1580	0	NA	2	1	R-HSA-390522	1	0	No	NA	No	2	muscle filament sliding [GO:0030049];positive regulation of gene expression [GO:0010628]	1	structural constituent of cytoskeleton [GO:0005200]	2	cytosol [GO:0005829];extracellular exosome [GO:0070062]
P51884	P51888	Lumican (Keratan sulfate proteoglycan lumican) (KSPG lumican)	Prolargin (Proline-arginine-rich end leucine-rich repeat protein)	0.45	686	486	396	0	no	7	5	R-HSA-2022854;R-HSA-3656244;R-HSA-2022857;R-HSA-3656243;R-HSA-3656225	5	0	yes	NA	No	2	keratan sulfate catabolic process [GO:0042340];keratan sulfate biosynthetic process [GO:0018146]	1	extracellular matrix structural constituent [GO:0005201]	6	lysosomal lumen [GO:0043202];extracellular exosome [GO:0070062];proteinaceous extracellular matrix [GO:0005578];extracellular space [GO:0005615];Golgi lumen [GO:0005796];extracellular region [GO:0005576]
Q14315	P98160	Filamin-C (FLN-C) (FLNc) (ABP-280-like protein) (ABP-L) (Actin-binding-like protein) (Filamin-2) (Gamma-filamin)	Basement membrane-specific heparan sulfate proteoglycan core protein (HSPG) (Perlecan) (PLC) [Cleaved into: Endorepellin; LG3 peptide]	0.45	1202	965	813	0	no	1	15	NF	0	0	No	NA	No	0	NF	0	NF	2	focal adhesion [GO:0005925];plasma membrane [GO:0005886]
P31513	Q9H2A2	Dimethylaniline monooxygenase [N-oxide-forming] 3 (EC 1.14.13.8) (Dimethylaniline oxidase 3) (FMO II) (FMO form 2) (Hepatic flavin-containing monooxygenase 3) (FMO 3) (Trimethylamine monooxygenase) (EC 1.14.13.148)	Aldehyde dehydrogenase family 8 member A1 (EC 1.2.1.-) (Aldehyde dehydrogenase 12)	0.45	67	70	46	0	no	2	1	NF	0	0	No	NA	No	0	NF	0	NF	0	NF
P60174	P63104	Triosephosphate isomerase (TIM) (EC 5.3.1.1) (Triose-phosphate isomerase)	14-3-3 protein zeta/delta (Protein kinase C inhibitor protein 1) (KCIP-1)	0.45	964	1034	790	1	NA	2	10	NF	0	0	No	NA	No	0	NF	1	ubiquitin protein ligase binding [GO:0031625]	4	nucleus [GO:0005634];extracellular space [GO:0005615];cytosol [GO:0005829];extracellular exosome [GO:0070062]
O43707	P12814	Alpha-actinin-4 (Non-muscle alpha-actinin 4)	Alpha-actinin-1 (Alpha-actinin cytoskeletal isoform) (F-actin cross-linking protein) (Non-muscle alpha-actinin-1)	0.45	1219	1043	907	0	yes	2	4	R-HSA-373753;R-HSA-114608	2	0	yes	NF	No	4	regulation of apoptotic process [GO:0042981];negative regulation of cellular component movement [GO:0051271];actin filament bundle assembly [GO:0051017];platelet degranulation [GO:0002576]	6	protein homodimerization activity [GO:0042803];ligand-dependent nuclear receptor transcription coactivator activity [GO:0030374];calcium ion binding [GO:0005509];actin filament binding [GO:0051015];integrin binding [GO:0005178];ion channel binding [GO:0044325]	12	Z disc [GO:0030018];platelet alpha granule lumen [GO:0031093];brush border [GO:0005903];extracellular exosome [GO:0070062];stress fiber [GO:0001725];cytoplasm [GO:0005737];focal adhesion [GO:0005925];extracellular space [GO:0005615];pseudopodium [GO:0031143];cell-cell junction [GO:0005911];intracellular [GO:0005622];extracellular region [GO:0005576]
P04350	P06733	Tubulin beta-4A chain (Tubulin 5 beta) (Tubulin beta-4 chain)	Alpha-enolase (EC 4.2.1.11) (2-phospho-D-glycerate hydro-lyase) (C-myc promoter-binding protein) (Enolase 1) (MBP-1) (MPB-1) (Non-neural enolase) (NNE) (Phosphopyruvate hydratase) (Plasminogen-binding protein)	0.45	1415	1341	1142	0	NA	28	2	NF	0	0	No	NA	No	0	NF	0	NF	4	myelin sheath [GO:0043209];nucleus [GO:0005634];cytosol [GO:0005829];extracellular exosome [GO:0070062]
P00338	P40926	L-lactate dehydrogenase A chain (LDH-A) (EC 1.1.1.27) (Cell proliferation-inducing gene 19 protein) (LDH muscle subunit) (LDH-M) (Renal carcinoma antigen NY-REN-59)	Malate dehydrogenase, mitochondrial (EC 1.1.1.37)	0.45	1044	928	754	0	NA	1	2	NF	0	0	No	NA	No	0	NF	0	NF	2	nucleus [GO:0005634];extracellular exosome [GO:0070062]
P62987	P0CG39	Ubiquitin-60S ribosomal protein L40 (CEP52) (Ubiquitin A-52 residue ribosomal protein fusion product 1) [Cleaved into: Ubiquitin; 60S ribosomal protein L40]	POTE ankyrin domain family member J	0.45	1429	1552	1266	0	NA	150	0	NF	0	0	No	NA	No	0	NF	0	NF	2	extracellular space [GO:0005615];extracellular exosome [GO:0070062]
A6NNZ2	Q9H853	Tubulin beta-8 chain-like protein LOC260334	Putative tubulin-like protein alpha-4B (Alpha-tubulin 4B)	0.45	1040	1161	818	0	no	17	19	R-HSA-68877;R-HSA-190861;R-HSA-2467813;R-HSA-6807878;R-HSA-983189;R-HSA-1445148;R-HSA-190840;R-HSA-5617833;R-HSA-437239;R-HSA-380320;R-HSA-6811436;R-HSA-6811434;R-HSA-2500257;R-HSA-5663220;R-HSA-2132295;R-HSA-8852276;R-HSA-5626467	17	NA	NA	NA	No	1	microtubule-based process [GO:0007017]	3	GTPase activity [GO:0003924];structural constituent of cytoskeleton [GO:0005200];GTP binding [GO:0005525]	2	cytoplasm [GO:0005737];microtubule [GO:0005874]
Q05639	Q9BYX7	Elongation factor 1-alpha 2 (EF-1-alpha-2) (Eukaryotic elongation factor 1 A-2) (eEF1A-2) (Statin-S1)	Putative beta-actin-like protein 3 (Kappa-actin) (POTE ankyrin domain family member K)	0.45	1397	1687	1331	0	no	1	1	NF	0	NA	NA	NA	No	0	NF	0	NF	0	NF
Q93099	Q02928	Homogentisate 1,2-dioxygenase (EC 1.13.11.5) (Homogentisate oxygenase) (Homogentisic acid oxidase) (Homogentisicase)	Cytochrome P450 4A11 (20-hydroxyeicosatetraenoic acid synthase) (20-HETE synthase) (CYP4AII) (CYPIVA11) (Cytochrome P-450HK-omega) (Cytochrome P450HL-omega) (Fatty acid omega-hydroxylase) (Lauric acid omega-hydroxylase) (Long-chain fatty acid omega-monooxygenase) (EC 1.14.13.205)	0.45	85	92	61	0	no	1	6	NF	0	0	No	NA	No	0	NF	0	NF	1	extracellular exosome [GO:0070062]
P06733	P68104	Alpha-enolase (EC 4.2.1.11) (2-phospho-D-glycerate hydro-lyase) (C-myc promoter-binding protein) (Enolase 1) (MBP-1) (MPB-1) (Non-neural enolase) (NNE) (Phosphopyruvate hydratase) (Plasminogen-binding protein)	Elongation factor 1-alpha 1 (EF-1-alpha-1) (Elongation factor Tu) (EF-Tu) (Eukaryotic elongation factor 1 A-1) (eEF1A-1) (Leukocyte receptor cluster member 7)	0.45	1341	1467	1144	0	NA	2	3	NF	0	0	No	NA	No	1	transcription, DNA-templated [GO:0006351]	1	poly(A) RNA binding [GO:0044822]	6	cytosol [GO:0005829];cytoplasm [GO:0005737];extracellular space [GO:0005615];membrane [GO:0016020];nucleus [GO:0005634];extracellular exosome [GO:0070062]
P12035	P19012	Keratin, type II cytoskeletal 3 (65 kDa cytokeratin) (Cytokeratin-3) (CK-3) (Keratin-3) (K3) (Type-II keratin Kb3)	Keratin, type I cytoskeletal 15 (Cytokeratin-15) (CK-15) (Keratin-15) (K15)	0.45	650	593	413	0	no	0	0	NF	0	0	No	NA	No	0	NF	0	NF	2	intermediate filament [GO:0005882];extracellular exosome [GO:0070062]
Q14032	P33261	Bile acid-CoA:amino acid N-acyltransferase (BACAT) (BAT) (EC 2.3.1.65) (Glycine N-choloyltransferase) (Long-chain fatty-acyl-CoA hydrolase) (EC 3.1.2.2)	Cytochrome P450 2C19 (EC 1.14.13.-) ((R)-limonene 6-monooxygenase) (EC 1.14.13.80) ((S)-limonene 6-monooxygenase) (EC 1.14.13.48) ((S)-limonene 7-monooxygenase) (EC 1.14.13.49) (CYPIIC17) (CYPIIC19) (Cytochrome P450-11A) (Cytochrome P450-254C) (Mephenytoin 4-hydroxylase)	0.45	64	57	41	0	no	2	4	NF	0	0	No	NA	No	0	NF	0	NF	0	NF
P0CG38	P68371	POTE ankyrin domain family member I	Tubulin beta-4B chain (Tubulin beta-2 chain) (Tubulin beta-2C chain)	0.45	1639	1553	1424	0	no	0	28	NF	0	0	No	NA	No	0	NF	0	NF	1	extracellular exosome [GO:0070062]
P68363	Q71U36	Tubulin alpha-1B chain (Alpha-tubulin ubiquitous) (Tubulin K-alpha-1) (Tubulin alpha-ubiquitous chain)	Tubulin alpha-1A chain (Alpha-tubulin 3) (Tubulin B-alpha-1) (Tubulin alpha-3 chain)	0.45	684	386	337	0	yes	21	28	R-HSA-68877;R-HSA-190861;R-HSA-5610787;R-HSA-2467813;R-HSA-6807878;R-HSA-983189;R-HSA-190840;R-HSA-1445148;R-HSA-5617833;R-HSA-437239;R-HSA-380320;R-HSA-389960;R-HSA-5620924;R-HSA-6811436;R-HSA-6811434;R-HSA-2500257;R-HSA-5663220;R-HSA-389977;R-HSA-2132295;R-HSA-8852276;R-HSA-5626467	21	0	No	3008_60S APC containing complex	No	3	cell division [GO:0051301];microtubule-based process [GO:0007017];cytoskeleton-dependent intracellular transport [GO:0030705]	4	structural molecule activity [GO:0005198];GTPase activity [GO:0003924];structural constituent of cytoskeleton [GO:0005200];GTP binding [GO:0005525]	4	myelin sheath [GO:0043209];microtubule [GO:0005874];extracellular exosome [GO:0070062];cytoplasmic microtubule [GO:0005881]
P0CG38	P07437	POTE ankyrin domain family member I	Tubulin beta chain (Tubulin beta-5 chain)	0.45	1639	1570	1438	0	no	0	6	NF	0	0	No	NA	No	0	NF	0	NF	1	extracellular exosome [GO:0070062]
Q96A08	Q16695	Histone H2B type 1-A (Histone H2B, testis) (TSH2B.1) (Testis-specific histone H2B)	Histone H3.1t (H3/t) (H3t) (H3/g)	0.45	1071	824	677	0	no	27	10	R-HSA-5693565;R-HSA-171306;R-HSA-5693571;R-HSA-2559586;R-HSA-912446;R-HSA-69473;R-HSA-201722;R-HSA-1221632;R-HSA-5693607;R-HSA-2299718	10	0	No	NA	No	1	nucleosome assembly [GO:0006334]	1	DNA binding [GO:0003677]	4	nucleus [GO:0005634];nuclear nucleosome [GO:0000788];nucleoplasm [GO:0005654];nucleosome [GO:0000786]
Q71DI3	Q96A08	Histone H3.2 (Histone H3/m) (Histone H3/o)	Histone H2B type 1-A (Histone H2B, testis) (TSH2B.1) (Testis-specific histone H2B)	0.45	831	1071	681	0	no	24	27	R-HSA-5578749;R-HSA-5617472;R-HSA-912446;R-HSA-73777;R-HSA-3214815;R-HSA-201722;R-HSA-2559582;R-HSA-3214847;R-HSA-212300;R-HSA-977225;R-HSA-427413;R-HSA-2559580;R-HSA-73728;R-HSA-427359;R-HSA-5625886;R-HSA-2299718;R-HSA-427389;R-HSA-5250924;R-HSA-5334118	19	0	No	NA	No	1	nucleosome assembly [GO:0006334]	1	DNA binding [GO:0003677]	3	nucleus [GO:0005634];nucleosome [GO:0000786];nucleoplasm [GO:0005654]
P27348	P61981	14-3-3 protein theta (14-3-3 protein T-cell) (14-3-3 protein tau) (Protein HS1)	14-3-3 protein gamma (Protein kinase C inhibitor protein 1) (KCIP-1) [Cleaved into: 14-3-3 protein gamma, N-terminally processed]	0.45	601	564	355	0	yes	5	11	R-HSA-111447;R-HSA-5628897;R-HSA-5625740;R-HSA-75035;R-HSA-1445148	5	0	yes	5919_BRAF-RAF1-14-3-3 complex;5199_Kinase maturation complex 1	No	3	membrane organization [GO:0061024];positive regulation of protein insertion into mitochondrial membrane involved in apoptotic signaling pathway [GO:1900740];protein targeting [GO:0006605]	0	NF	6	cytosol [GO:0005829];mitochondrion [GO:0005739];cytoplasmic vesicle membrane [GO:0030659];focal adhesion [GO:0005925];membrane [GO:0016020];extracellular exosome [GO:0070062]
Q13885	P06733	Tubulin beta-2A chain (Tubulin beta class IIa)	Alpha-enolase (EC 4.2.1.11) (2-phospho-D-glycerate hydro-lyase) (C-myc promoter-binding protein) (Enolase 1) (MBP-1) (MPB-1) (Non-neural enolase) (NNE) (Phosphopyruvate hydratase) (Plasminogen-binding protein)	0.45	1484	1341	1184	0	NA	22	2	NF	0	0	No	NA	No	0	NF	0	NF	3	nucleus [GO:0005634];cytoplasm [GO:0005737];extracellular exosome [GO:0070062]
P26038	P11021	Moesin (Membrane-organizing extension spike protein)	78 kDa glucose-regulated protein (GRP-78) (Endoplasmic reticulum lumenal Ca(2+)-binding protein grp78) (Heat shock 70 kDa protein 5) (Immunoglobulin heavy chain-binding protein) (BiP)	0.45	1242	1404	1086	0	yes	1	7	NF	0	0	No	NA	No	0	NF	0	NF	5	focal adhesion [GO:0005925];nucleus [GO:0005634];plasma membrane [GO:0005886];extracellular exosome [GO:0070062];myelin sheath [GO:0043209]
P0CG39	P62979	POTE ankyrin domain family member J	Ubiquitin-40S ribosomal protein S27a (Ubiquitin carboxyl extension protein 80) [Cleaved into: Ubiquitin; 40S ribosomal protein S27a]	0.45	1552	1435	1270	0	NA	0	153	NF	0	0	No	NA	Yes	0	NF	0	NF	2	extracellular space [GO:0005615];extracellular exosome [GO:0070062]
Q96A08	P84243	Histone H2B type 1-A (Histone H2B, testis) (TSH2B.1) (Testis-specific histone H2B)	Histone H3.3	0.45	1071	830	680	0	no	27	18	R-HSA-5617472;R-HSA-73777;R-HSA-977225;R-HSA-427413;R-HSA-5625886;R-HSA-5334118;R-HSA-5578749;R-HSA-912446;R-HSA-201722;R-HSA-2559582;R-HSA-212300;R-HSA-2559580;R-HSA-73728;R-HSA-427359;R-HSA-2299718;R-HSA-427389;R-HSA-5250924	17	0	No	NA	No	1	nucleosome assembly [GO:0006334]	0	NF	5	nuclear chromosome, telomeric region [GO:0000784];nucleus [GO:0005634];nuclear nucleosome [GO:0000788];nucleoplasm [GO:0005654];nucleosome [GO:0000786]
P11055	Q14896	Myosin-3 (Muscle embryonic myosin heavy chain) (Myosin heavy chain 3) (Myosin heavy chain, fast skeletal muscle, embryonic) (SMHCE)	Myosin-binding protein C, cardiac-type (Cardiac MyBP-C) (C-protein, cardiac muscle isoform)	0.45	383	193	189	0	no	2	1	R-HSA-390522	1	0	No	NA	No	1	muscle filament sliding [GO:0030049]	0	NF	2	sarcomere [GO:0030017];cytosol [GO:0005829]
Q9BQE3	P0CG38	Tubulin alpha-1C chain (Alpha-tubulin 6) (Tubulin alpha-6 chain)	POTE ankyrin domain family member I	0.45	1659	1639	1529	0	no	22	0	NF	0	0	No	NA	No	0	NF	0	NF	0	NF
P68366	P06733	Tubulin alpha-4A chain (Alpha-tubulin 1) (Testis-specific alpha-tubulin) (Tubulin H2-alpha) (Tubulin alpha-1 chain)	Alpha-enolase (EC 4.2.1.11) (2-phospho-D-glycerate hydro-lyase) (C-myc promoter-binding protein) (Enolase 1) (MBP-1) (MPB-1) (Non-neural enolase) (NNE) (Phosphopyruvate hydratase) (Plasminogen-binding protein)	0.45	1599	1341	1229	0	NA	29	2	NF	0	0	No	NA	No	0	NF	0	NF	2	cytosol [GO:0005829];extracellular exosome [GO:0070062]
P0CG38	P68366	POTE ankyrin domain family member I	Tubulin alpha-4A chain (Alpha-tubulin 1) (Testis-specific alpha-tubulin) (Tubulin H2-alpha) (Tubulin alpha-1 chain)	0.45	1639	1599	1465	0	no	0	29	NF	0	0	No	NA	No	0	NF	0	NF	1	extracellular exosome [GO:0070062]
P0CG39	P0CG47	POTE ankyrin domain family member J	Polyubiquitin-B [Cleaved into: Ubiquitin]	0.45	1552	1428	1265	0	NA	0	139	NF	0	0	No	NA	No	0	NF	1		2	extracellular space [GO:0005615];extracellular exosome [GO:0070062]
P18206	P12814	Vinculin (Metavinculin) (MV)	Alpha-actinin-1 (Alpha-actinin cytoskeletal isoform) (F-actin cross-linking protein) (Non-muscle alpha-actinin-1)	0.45	1196	1439	1079	0	no	3	4	R-HSA-114608	1	0	No	5177_Polycystin-1 multiprotein complex (ACTN1, CDH1, SRC, JUP, VCL, CTNNB1, PXN, BCAR1, PKD1, PTK2, TLN1)	No	1	platelet degranulation [GO:0002576]	0	NF	8	brush border [GO:0005903];cytosol [GO:0005829];fascia adherens [GO:0005916];focal adhesion [GO:0005925];cell-cell junction [GO:0005911];plasma membrane [GO:0005886];extracellular region [GO:0005576];extracellular exosome [GO:0070062]
P61026	P51149	Ras-related protein Rab-10	Ras-related protein Rab-7a	0.45	675	632	428	0	yes	1	1	NF	0	0	No	NA	No	1	small GTPase mediated signal transduction [GO:0007264]	3	GTP binding [GO:0005525];GTPase activity [GO:0003924];GDP binding [GO:0019003]	3	phagocytic vesicle membrane [GO:0030670];extracellular exosome [GO:0070062];Golgi apparatus [GO:0005794]
P16104	Q5QNW6	Histone H2AX (H2a/x) (Histone H2A.X)	Histone H2B type 2-F	0.44	912	1144	783	0	no	26	2	NF	0	0	No	NA	No	1	nucleosome assembly [GO:0006334]	1	DNA binding [GO:0003677]	3	nucleus [GO:0005634];nucleoplasm [GO:0005654];extracellular exosome [GO:0070062]
P35579	Q15149	Myosin-9 (Cellular myosin heavy chain, type A) (Myosin heavy chain 9) (Myosin heavy chain, non-muscle IIa) (Non-muscle myosin heavy chain A) (NMMHC-A) (Non-muscle myosin heavy chain IIa) (NMMHC II-a) (NMMHC-IIA)	Plectin (PCN) (PLTN) (Hemidesmosomal protein 1) (HD1) (Plectin-1)	0.44	1582	1387	1309	1	NA	7	3	NF	0	0	No	NA	No	0	NF	2	cadherin binding involved in cell-cell adhesion [GO:0098641];poly(A) RNA binding [GO:0044822]	8	cell-cell adherens junction [GO:0005913];extracellular matrix [GO:0031012];brush border [GO:0005903];cytosol [GO:0005829];cytoplasm [GO:0005737];focal adhesion [GO:0005925];plasma membrane [GO:0005886];extracellular exosome [GO:0070062]
Q99877	Q99878	Histone H2B type 1-N (Histone H2B.d) (H2B/d)	Histone H2A type 1-J (Histone H2A/e)	0.44	1140	927	793	0	no	27	24	R-HSA-5617472;R-HSA-73777;R-HSA-606279;R-HSA-3214847;R-HSA-977225;R-HSA-427413;R-HSA-171306;R-HSA-5625886;R-HSA-5334118;R-HSA-5578749;R-HSA-2559586;R-HSA-912446;R-HSA-3214815;R-HSA-201722;R-HSA-1221632;R-HSA-2559582;R-HSA-212300;R-HSA-2559580;R-HSA-73728;R-HSA-427359;R-HSA-2299718;R-HSA-427389;R-HSA-5250924	23	0	No	NA	No	0	NF	1	DNA binding [GO:0003677]	3	nucleus [GO:0005634];nucleosome [GO:0000786];extracellular exosome [GO:0070062]
P12236	Q00325	ADP/ATP translocase 3 (ADP,ATP carrier protein 3) (ADP,ATP carrier protein, isoform T2) (ANT 2) (Adenine nucleotide translocator 3) (ANT 3) (Solute carrier family 25 member 6) [Cleaved into: ADP/ATP translocase 3, N-terminally processed]	Phosphate carrier protein, mitochondrial (Phosphate transport protein) (PTP) (Solute carrier family 25 member 3)	0.44	858	895	608	0	no	4	0	NF	0	0	No	NA	No	1	translation [GO:0006412]	1	structural constituent of ribosome [GO:0003735]	3	mitochondrial inner membrane [GO:0005743];nucleus [GO:0005634];mitochondrion [GO:0005739]
Q99877	P0C0S8	Histone H2B type 1-N (Histone H2B.d) (H2B/d)	Histone H2A type 1 (H2A.1) (Histone H2A/p)	0.44	1140	927	793	0	no	27	3	R-HSA-3214847;R-HSA-3214815	2	0	No	NA	No	0	NF	1	DNA binding [GO:0003677]	3	nucleus [GO:0005634];nucleosome [GO:0000786];extracellular exosome [GO:0070062]
P33778	Q6FI13	Histone H2B type 1-B (Histone H2B.1) (Histone H2B.f) (H2B/f)	Histone H2A type 2-A (Histone H2A.2) (Histone H2A/o)	0.44	1138	923	790	0	no	27	24	R-HSA-5617472;R-HSA-73777;R-HSA-606279;R-HSA-3214847;R-HSA-977225;R-HSA-427413;R-HSA-171306;R-HSA-5625886;R-HSA-5334118;R-HSA-5578749;R-HSA-2559586;R-HSA-912446;R-HSA-3214815;R-HSA-201722;R-HSA-1221632;R-HSA-2559582;R-HSA-212300;R-HSA-2559580;R-HSA-73728;R-HSA-427359;R-HSA-2299718;R-HSA-427389;R-HSA-5250924	23	0	No	NA	No	0	NF	1	DNA binding [GO:0003677]	2	nucleus [GO:0005634];nucleosome [GO:0000786]
Q9BQE3	P06733	Tubulin alpha-1C chain (Alpha-tubulin 6) (Tubulin alpha-6 chain)	Alpha-enolase (EC 4.2.1.11) (2-phospho-D-glycerate hydro-lyase) (C-myc promoter-binding protein) (Enolase 1) (MBP-1) (MPB-1) (Non-neural enolase) (NNE) (Phosphopyruvate hydratase) (Plasminogen-binding protein)	0.44	1659	1341	1269	0	NA	22	2	NF	0	0	No	NA	No	0	NF	0	NF	2	nucleus [GO:0005634];cytoplasm [GO:0005737]
P02671	P02679	Fibrinogen alpha chain [Cleaved into: Fibrinopeptide A; Fibrinogen alpha chain]	Fibrinogen gamma chain	0.44	1067	958	799	1	NA	8	7	R-HSA-140875;R-HSA-5674135;R-HSA-372708;R-HSA-354192;R-HSA-114608;R-HSA-216083;R-HSA-354194	7	0	No	NA	No	21	extracellular matrix organization [GO:0030198];protein polymerization [GO:0051258];positive regulation of peptide hormone secretion [GO:0090277];positive regulation of protein secretion [GO:0050714];positive regulation of ERK1 and ERK2 cascade [GO:0070374];negative regulation of endothelial cell apoptotic process [GO:2000352];platelet aggregation [GO:0070527];negative regulation of extrinsic apop…	2	metal ion binding [GO:0046872];structural molecule activity [GO:0005198]	11	fibrinogen complex [GO:0005577];platelet alpha granule [GO:0031091];extracellular exosome [GO:0070062];blood microparticle [GO:0072562];cell surface [GO:0009986];extracellular space [GO:0005615];external side of plasma membrane [GO:0009897];cell cortex [GO:0005938];extracellular region [GO:0005576];platelet alpha granule lumen [GO:0031093];plasma membrane [GO:0005886]
Q96KK5	Q16778	Histone H2A type 1-H (Histone H2A/s)	Histone H2B type 2-E (Histone H2B-GL105) (Histone H2B.q) (H2B/q)	0.44	927	1143	798	0	no	3	27	R-HSA-3214815;R-HSA-3214847	2	0	No	NA	No	0	NF	1	DNA binding [GO:0003677]	2	nucleosome [GO:0000786];extracellular exosome [GO:0070062]
Q8N257	Q9BTM1	Histone H2B type 3-B (H2B type 12)	Histone H2A.J (H2a/j)	0.44	1134	926	791	0	no	27	0	NF	0	0	No	NA	No	0	NF	1	DNA binding [GO:0003677]	0	NF
P01607	P01598	Ig kappa chain V-I region Rei	Ig kappa chain V-I region EU	0.44	97	81	57	0	no	14	14	R-HSA-2871796;R-HSA-2730905;R-HSA-166663;R-HSA-173623;R-HSA-2871837;R-HSA-2168880;R-HSA-2454202;R-HSA-2029485;R-HSA-5690714;R-HSA-2871809;R-HSA-198933;R-HSA-2029481;R-HSA-983695;R-HSA-2029482	14	NA	NA	NA	No	0	NA	0	NA	0	NA
Q93079	Q9BTM1	Histone H2B type 1-H (Histone H2B.j) (H2B/j)	Histone H2A.J (H2a/j)	0.44	1144	926	796	0	no	27	0	NF	0	0	No	NA	No	0	NF	1	DNA binding [GO:0003677]	2	nucleosome [GO:0000786];extracellular exosome [GO:0070062]
P01834	B9A064	Ig kappa chain C region	Immunoglobulin lambda-like polypeptide 5 (G lambda-1) (Germline immunoglobulin lambda 1)	0.44	588	489	364	0	no	14	0	NF	0	NA	NA	NA	No	7	phagocytosis, engulfment [GO:0006911];complement activation, classical pathway [GO:0006958];innate immune response [GO:0045087];defense response to bacterium [GO:0042742];phagocytosis, recognition [GO:0006910];B cell receptor signaling pathway [GO:0050853];positive regulation of B cell activation [GO:0050871]	2	immunoglobulin receptor binding [GO:0034987];antigen binding [GO:0003823]	4	immunoglobulin complex, circulating [GO:0042571];external side of plasma membrane [GO:0009897];extracellular exosome [GO:0070062];blood microparticle [GO:0072562]
P57053	Q9BTM1	Histone H2B type F-S (Histone H2B.s) (H2B/s)	Histone H2A.J (H2a/j)	0.44	1142	926	795	0	no	25	0	NF	0	0	No	NA	No	0	NF	1	DNA binding [GO:0003677]	0	NF
Q99878	Q8N257	Histone H2A type 1-J (Histone H2A/e)	Histone H2B type 3-B (H2B type 12)	0.44	927	1134	792	0	no	24	27	R-HSA-5578749;R-HSA-5617472;R-HSA-912446;R-HSA-2559586;R-HSA-73777;R-HSA-3214815;R-HSA-201722;R-HSA-606279;R-HSA-1221632;R-HSA-2559582;R-HSA-3214847;R-HSA-212300;R-HSA-977225;R-HSA-427413;R-HSA-171306;R-HSA-2559580;R-HSA-73728;R-HSA-427359;R-HSA-5625886;R-HSA-2299718;R-HSA-427389;R-HSA-5250924;R-HSA-5334118	23	0	No	NA	No	0	NF	1	DNA binding [GO:0003677]	1	nucleus [GO:0005634]
P00558	P04075	Phosphoglycerate kinase 1 (EC 2.7.2.3) (Cell migration-inducing gene 10 protein) (Primer recognition protein 2) (PRP 2)	Fructose-bisphosphate aldolase A (EC 4.1.2.13) (Lung cancer antigen NY-LU-1) (Muscle-type aldolase)	0.44	1111	1132	908	0	yes	2	3	R-HSA-70263;R-HSA-70171	2	0	No	NA	No	2	canonical glycolysis [GO:0061621];gluconeogenesis [GO:0006094]	0	NF	3	membrane [GO:0016020];cytosol [GO:0005829];extracellular exosome [GO:0070062]
Q96KK5	P06899	Histone H2A type 1-H (Histone H2A/s)	Histone H2B type 1-J (Histone H2B.1) (Histone H2B.r) (H2B/r)	0.44	927	1142	798	0	no	3	27	R-HSA-3214815;R-HSA-3214847	2	0	No	NA	No	0	NF	1	DNA binding [GO:0003677]	1	nucleosome [GO:0000786]
P08670	Q6S8J3	Vimentin	POTE ankyrin domain family member E (ANKRD26-like family C member 1A) (Prostate, ovary, testis-expressed protein on chromosome 2) (POTE-2)	0.44	1656	1710	1546	0	NA	2	0	NF	0	0	No	NA	No	0	NF	0	NF	1	extracellular exosome [GO:0070062]
P06899	Q6FI13	Histone H2B type 1-J (Histone H2B.1) (Histone H2B.r) (H2B/r)	Histone H2A type 2-A (Histone H2A.2) (Histone H2A/o)	0.44	1142	923	795	0	no	27	24	R-HSA-5617472;R-HSA-73777;R-HSA-606279;R-HSA-3214847;R-HSA-977225;R-HSA-427413;R-HSA-171306;R-HSA-5625886;R-HSA-5334118;R-HSA-5578749;R-HSA-2559586;R-HSA-912446;R-HSA-3214815;R-HSA-201722;R-HSA-1221632;R-HSA-2559582;R-HSA-212300;R-HSA-2559580;R-HSA-73728;R-HSA-427359;R-HSA-2299718;R-HSA-427389;R-HSA-5250924	23	0	No	NA	No	0	NF	1	DNA binding [GO:0003677]	2	nucleus [GO:0005634];nucleosome [GO:0000786]
P11142	P07900	Heat shock cognate 71 kDa protein (Heat shock 70 kDa protein 8) (Lipopolysaccharide-associated protein 1) (LAP-1) (LPS-associated protein 1)	Heat shock protein HSP 90-alpha (Heat shock 86 kDa) (HSP 86) (HSP86) (Lipopolysaccharide-associated protein 2) (LAP-2) (LPS-associated protein 2) (Renal carcinoma antigen NY-REN-38)	0.44	1434	1500	1280	1	yes	9	24	R-HSA-3371571;R-HSA-3371568	2	0	No	2721_HCF-1 complex	No	5	response to unfolded protein [GO:0006986];protein refolding [GO:0042026];regulation of cellular response to heat [GO:1900034];chaperone-mediated autophagy [GO:0061684];regulation of protein complex assembly [GO:0043254]	4	ATP binding [GO:0005524];MHC class II protein complex binding [GO:0023026];poly(A) RNA binding [GO:0044822];ATPase activity [GO:0016887]	10	lysosomal lumen [GO:0043202];extracellular matrix [GO:0031012];cytosol [GO:0005829];nucleoplasm [GO:0005654];myelin sheath [GO:0043209];membrane [GO:0016020];melanosome [GO:0042470];nucleus [GO:0005634];plasma membrane [GO:0005886];extracellular exosome [GO:0070062]
P48052	P15086	Carboxypeptidase A2 (EC 3.4.17.15)	Carboxypeptidase B (EC 3.4.17.2) (Pancreas-specific protein) (PASP)	0.44	34	41	26	0	no	0	1	NF	0	0	yes	NA	No	0	NF	3	zinc ion binding [GO:0008270];carboxypeptidase activity [GO:0004180];metallocarboxypeptidase activity [GO:0004181]	1	extracellular space [GO:0005615]
P06899	P0C0S8	Histone H2B type 1-J (Histone H2B.1) (Histone H2B.r) (H2B/r)	Histone H2A type 1 (H2A.1) (Histone H2A/p)	0.44	1142	927	798	0	no	27	3	R-HSA-3214847;R-HSA-3214815	2	0	No	NA	No	0	NF	1	DNA binding [GO:0003677]	2	nucleus [GO:0005634];nucleosome [GO:0000786]
Q00839	P19338	Heterogeneous nuclear ribonucleoprotein U (hnRNP U) (Scaffold attachment factor A) (SAF-A) (p120) (pp120)	Nucleolin (Protein C23)	0.44	1002	952	706	0	no	2	0	NF	0	0	No	3055_Nop56p-associated pre-rRNA complex;3082_DGCR8 multiprotein complex	No	0	NF	2	poly(A) RNA binding [GO:0044822];RNA binding [GO:0003723]	6	nucleoplasm [GO:0005654];cytoplasmic ribonucleoprotein granule [GO:0036464];cell surface [GO:0009986];membrane [GO:0016020];nucleus [GO:0005634];intracellular ribonucleoprotein complex [GO:0030529]
P23527	Q6FI13	Histone H2B type 1-O (Histone H2B.2) (Histone H2B.n) (H2B/n)	Histone H2A type 2-A (Histone H2A.2) (Histone H2A/o)	0.44	1141	923	793	0	no	27	24	R-HSA-5617472;R-HSA-73777;R-HSA-606279;R-HSA-3214847;R-HSA-977225;R-HSA-427413;R-HSA-171306;R-HSA-5625886;R-HSA-5334118;R-HSA-5578749;R-HSA-2559586;R-HSA-912446;R-HSA-3214815;R-HSA-201722;R-HSA-1221632;R-HSA-2559582;R-HSA-212300;R-HSA-2559580;R-HSA-73728;R-HSA-427359;R-HSA-2299718;R-HSA-427389;R-HSA-5250924	23	0	No	NA	No	0	NF	1	DNA binding [GO:0003677]	2	nucleus [GO:0005634];nucleosome [GO:0000786]
P20853	P33261	Cytochrome P450 2A7 (EC 1.14.14.1) (CYPIIA7) (Cytochrome P450 IIA4)	Cytochrome P450 2C19 (EC 1.14.13.-) ((R)-limonene 6-monooxygenase) (EC 1.14.13.80) ((S)-limonene 6-monooxygenase) (EC 1.14.13.48) ((S)-limonene 7-monooxygenase) (EC 1.14.13.49) (CYPIIC17) (CYPIIC19) (Cytochrome P450-11A) (Cytochrome P450-254C) (Mephenytoin 4-hydroxylase)	0.44	47	57	42	0	no	3	4	R-HSA-211981;R-HSA-211999	2	0	yes	NA	No	1	epoxygenase P450 pathway [GO:0019373]	5	heme binding [GO:0020037];steroid hydroxylase activity [GO:0008395];iron ion binding [GO:0005506];oxygen binding [GO:0019825];arachidonic acid epoxygenase activity [GO:0008392]	2	organelle membrane [GO:0031090];endoplasmic reticulum membrane [GO:0005789]
P23527	Q9BTM1	Histone H2B type 1-O (Histone H2B.2) (Histone H2B.n) (H2B/n)	Histone H2A.J (H2a/j)	0.44	1141	926	795	0	no	27	0	NF	0	0	No	NA	No	0	NF	1	DNA binding [GO:0003677]	1	nucleosome [GO:0000786]
P11142	P26038	Heat shock cognate 71 kDa protein (Heat shock 70 kDa protein 8) (Lipopolysaccharide-associated protein 1) (LAP-1) (LPS-associated protein 1)	Moesin (Membrane-organizing extension spike protein)	0.44	1434	1242	1094	0	no	9	1	NF	0	0	No	NA	No	0	NF	0	NF	7	extracellular exosome [GO:0070062];blood microparticle [GO:0072562];focal adhesion [GO:0005925];extracellular space [GO:0005615];myelin sheath [GO:0043209];nucleus [GO:0005634];plasma membrane [GO:0005886]
P23526	O75874	Adenosylhomocysteinase (AdoHcyase) (EC 3.3.1.1) (S-adenosyl-L-homocysteine hydrolase)	Isocitrate dehydrogenase [NADP] cytoplasmic (IDH) (EC 1.1.1.42) (Cytosolic NADP-isocitrate dehydrogenase) (IDP) (NADP(+)-specific ICDH) (Oxalosuccinate decarboxylase)	0.44	667	679	464	0	no	4	2	NF	0	0	No	NA	No	0	NF	1	NAD binding [GO:0051287]	3	cytoplasm [GO:0005737];cytosol [GO:0005829];extracellular exosome [GO:0070062]
P12956	P52272	X-ray repair cross-complementing protein 6 (EC 3.6.4.-) (EC 4.2.99.-) (5'-deoxyribose-5-phosphate lyase Ku70) (5'-dRP lyase Ku70) (70 kDa subunit of Ku antigen) (ATP-dependent DNA helicase 2 subunit 1) (ATP-dependent DNA helicase II 70 kDa subunit) (CTC box-binding factor 75 kDa subunit) (CTC75) (CTCBF) (DNA repair protein XRCC6) (Lupus Ku autoantigen protein p70) (Ku70) (Thyroid-lupus autoantige…	Heterogeneous nuclear ribonucleoprotein M (hnRNP M)	0.44	816	879	634	0	no	4	3	NF	0	0	No	NF	No	0	NF	1	poly(A) RNA binding [GO:0044822]	2	nucleoplasm [GO:0005654];membrane [GO:0016020]
Q13885	P68104	Tubulin beta-2A chain (Tubulin beta class IIa)	Elongation factor 1-alpha 1 (EF-1-alpha-1) (Elongation factor Tu) (EF-Tu) (Eukaryotic elongation factor 1 A-1) (eEF1A-1) (Leukocyte receptor cluster member 7)	0.44	1484	1467	1280	0	no	22	3	NF	0	0	No	NA	No	0	NF	2	GTPase activity [GO:0003924];GTP binding [GO:0005525]	3	nucleus [GO:0005634];cytoplasm [GO:0005737];extracellular exosome [GO:0070062]
P00558	P06733	Phosphoglycerate kinase 1 (EC 2.7.2.3) (Cell migration-inducing gene 10 protein) (Primer recognition protein 2) (PRP 2)	Alpha-enolase (EC 4.2.1.11) (2-phospho-D-glycerate hydro-lyase) (C-myc promoter-binding protein) (Enolase 1) (MBP-1) (MPB-1) (Non-neural enolase) (NNE) (Phosphopyruvate hydratase) (Plasminogen-binding protein)	0.44	1111	1341	1033	0	NA	2	2	R-HSA-70263;R-HSA-70171	2	0	No	NA	No	2	canonical glycolysis [GO:0061621];gluconeogenesis [GO:0006094]	0	NF	3	membrane [GO:0016020];cytosol [GO:0005829];extracellular exosome [GO:0070062]
P33778	P0C0S8	Histone H2B type 1-B (Histone H2B.1) (Histone H2B.f) (H2B/f)	Histone H2A type 1 (H2A.1) (Histone H2A/p)	0.44	1138	927	793	0	no	27	3	R-HSA-3214847;R-HSA-3214815	2	0	No	NA	No	0	NF	1	DNA binding [GO:0003677]	2	nucleus [GO:0005634];nucleosome [GO:0000786]
P33778	Q9BTM1	Histone H2B type 1-B (Histone H2B.1) (Histone H2B.f) (H2B/f)	Histone H2A.J (H2a/j)	0.44	1138	926	792	0	no	27	0	NF	0	0	No	NA	No	0	NF	1	DNA binding [GO:0003677]	1	nucleosome [GO:0000786]
Q99878	P57053	Histone H2A type 1-J (Histone H2A/e)	Histone H2B type F-S (Histone H2B.s) (H2B/s)	0.44	927	1142	796	0	no	24	25	R-HSA-5578749;R-HSA-5617472;R-HSA-912446;R-HSA-2559586;R-HSA-73777;R-HSA-201722;R-HSA-606279;R-HSA-1221632;R-HSA-2559582;R-HSA-212300;R-HSA-977225;R-HSA-427413;R-HSA-171306;R-HSA-2559580;R-HSA-73728;R-HSA-427359;R-HSA-5625886;R-HSA-2299718;R-HSA-427389;R-HSA-5250924;R-HSA-5334118	21	0	No	NA	No	0	NF	1	DNA binding [GO:0003677]	1	nucleus [GO:0005634]
O60814	Q9BTM1	Histone H2B type 1-K (H2B K) (HIRA-interacting protein 1)	Histone H2A.J (H2a/j)	0.44	1143	926	796	0	no	27	0	NF	0	0	No	NA	No	0	NF	1	DNA binding [GO:0003677]	0	NF
P0C0S8	Q16778	Histone H2A type 1 (H2A.1) (Histone H2A/p)	Histone H2B type 2-E (Histone H2B-GL105) (Histone H2B.q) (H2B/q)	0.44	927	1143	798	0	no	3	27	R-HSA-3214815;R-HSA-3214847	2	0	No	NA	No	0	NF	1	DNA binding [GO:0003677]	3	nucleus [GO:0005634];nucleosome [GO:0000786];extracellular exosome [GO:0070062]
P68366	P06576	Tubulin alpha-4A chain (Alpha-tubulin 1) (Testis-specific alpha-tubulin) (Tubulin H2-alpha) (Tubulin alpha-1 chain)	ATP synthase subunit beta, mitochondrial (EC 3.6.3.14)	0.44	1599	1229	1137	0	no	29	3	NF	0	0	No	NF	No	0	NF	0	NF	1	extracellular exosome [GO:0070062]
Q9BVA1	P68104	Tubulin beta-2B chain	Elongation factor 1-alpha 1 (EF-1-alpha-1) (Elongation factor Tu) (EF-Tu) (Eukaryotic elongation factor 1 A-1) (eEF1A-1) (Leukocyte receptor cluster member 7)	0.44	1478	1467	1276	0	no	22	3	NF	0	0	No	NF	No	0	NF	2	GTPase activity [GO:0003924];GTP binding [GO:0005525]	2	nucleus [GO:0005634];cytoplasm [GO:0005737]
P11712	Q9H2A2	Cytochrome P450 2C9 (EC 1.14.13.-) ((R)-limonene 6-monooxygenase) (EC 1.14.13.80) ((S)-limonene 6-monooxygenase) (EC 1.14.13.48) ((S)-limonene 7-monooxygenase) (EC 1.14.13.49) (CYPIIC9) (Cholesterol 25-hydroxylase) (EC 1.14.99.38) (Cytochrome P-450MP) (Cytochrome P450 MP-4) (Cytochrome P450 MP-8) (Cytochrome P450 PB-1) (S-mephenytoin 4-hydroxylase)	Aldehyde dehydrogenase family 8 member A1 (EC 1.2.1.-) (Aldehyde dehydrogenase 12)	0.44	60	70	46	0	no	4	1	NF	0	0	No	NA	No	0	NF	0	NF	0	NF
P62807	Q96KK5	Histone H2B type 1-C/E/F/G/I (Histone H2B.1 A) (Histone H2B.a) (H2B/a) (Histone H2B.g) (H2B/g) (Histone H2B.h) (H2B/h) (Histone H2B.k) (H2B/k) (Histone H2B.l) (H2B/l)	Histone H2A type 1-H (Histone H2A/s)	0.44	1144	927	797	0	no	27	3	R-HSA-3214847;R-HSA-3214815	2	0	No	NA	No	0	NF	1	DNA binding [GO:0003677]	2	nucleosome [GO:0000786];extracellular exosome [GO:0070062]
P13646	O95678	Keratin, type I cytoskeletal 13 (Cytokeratin-13) (CK-13) (Keratin-13) (K13)	Keratin, type II cytoskeletal 75 (Cytokeratin-75) (CK-75) (Keratin-6 hair follicle) (hK6hf) (Keratin-75) (K75) (Type II keratin-K6hf) (Type-II keratin Kb18)	0.44	690	819	539	0	no	0	0	NF	0	0	No	NA	No	0	NF	1	structural molecule activity [GO:0005198]	2	keratin filament [GO:0045095];extracellular exosome [GO:0070062]
P16104	P57053	Histone H2AX (H2a/x) (Histone H2A.X)	Histone H2B type F-S (Histone H2B.s) (H2B/s)	0.44	912	1142	782	0	no	26	25	R-HSA-5617472;R-HSA-73777;R-HSA-606279;R-HSA-5693565;R-HSA-977225;R-HSA-427413;R-HSA-171306;R-HSA-5693571;R-HSA-5625886;R-HSA-5334118;R-HSA-5578749;R-HSA-2559586;R-HSA-912446;R-HSA-69473;R-HSA-201722;R-HSA-1221632;R-HSA-2559582;R-HSA-212300;R-HSA-5693607;R-HSA-2559580;R-HSA-73728;R-HSA-427359;R-HSA-2299718;R-HSA-427389;R-HSA-5250924	25	0	No	NA	No	1	nucleosome assembly [GO:0006334]	1	DNA binding [GO:0003677]	2	nucleus [GO:0005634];nucleoplasm [GO:0005654]
P22314	Q14697	Ubiquitin-like modifier-activating enzyme 1 (EC 6.2.1.45) (Protein A1S9) (Ubiquitin-activating enzyme E1)	Neutral alpha-glucosidase AB (EC 3.2.1.84) (Alpha-glucosidase 2) (Glucosidase II subunit alpha)	0.44	1114	1046	827	0	no	1	2	NF	0	0	No	NA	No	0	NF	1	poly(A) RNA binding [GO:0044822]	1	extracellular exosome [GO:0070062]
P12110	P08123	Collagen alpha-2(VI) chain	Collagen alpha-2(I) chain (Alpha-2 type I collagen)	0.44	818	736	598	0	NA	7	15	R-HSA-1442490;R-HSA-3000178;R-HSA-216083;R-HSA-1650814;R-HSA-2022090	5	0	No	NA	No	3	protein heterotrimerization [GO:0070208];extracellular matrix organization [GO:0030198];collagen catabolic process [GO:0030574]	0	NF	5	endoplasmic reticulum lumen [GO:0005788];extracellular region [GO:0005576];extracellular matrix [GO:0031012];extracellular space [GO:0005615];extracellular exosome [GO:0070062]
P06733	Q13748	Alpha-enolase (EC 4.2.1.11) (2-phospho-D-glycerate hydro-lyase) (C-myc promoter-binding protein) (Enolase 1) (MBP-1) (MPB-1) (Non-neural enolase) (NNE) (Phosphopyruvate hydratase) (Plasminogen-binding protein)	Tubulin alpha-3C/D chain (Alpha-tubulin 2) (Alpha-tubulin 3C/D) (Tubulin alpha-2 chain)	0.44	1341	1599	1229	0	NA	2	22	NF	0	0	No	NA	No	0	NF	0	NF	2	nucleus [GO:0005634];cytoplasm [GO:0005737]
Q71U36	P06733	Tubulin alpha-1A chain (Alpha-tubulin 3) (Tubulin B-alpha-1) (Tubulin alpha-3 chain)	Alpha-enolase (EC 4.2.1.11) (2-phospho-D-glycerate hydro-lyase) (C-myc promoter-binding protein) (Enolase 1) (MBP-1) (MPB-1) (Non-neural enolase) (NNE) (Phosphopyruvate hydratase) (Plasminogen-binding protein)	0.44	1654	1341	1267	0	NA	28	2	NF	0	0	No	NA	No	0	NF	0	NF	4	myelin sheath [GO:0043209];nucleus [GO:0005634];cytosol [GO:0005829];extracellular exosome [GO:0070062]
Q16777	Q5QNW6	Histone H2A type 2-C (Histone H2A-GL101) (Histone H2A/q)	Histone H2B type 2-F	0.44	922	1144	793	0	no	24	2	R-HSA-3214815;R-HSA-3214847	2	0	No	NA	No	0	NF	1	DNA binding [GO:0003677]	2	nucleus [GO:0005634];extracellular exosome [GO:0070062]
Q99878	Q16778	Histone H2A type 1-J (Histone H2A/e)	Histone H2B type 2-E (Histone H2B-GL105) (Histone H2B.q) (H2B/q)	0.44	927	1143	798	0	no	24	27	R-HSA-5578749;R-HSA-5617472;R-HSA-912446;R-HSA-2559586;R-HSA-73777;R-HSA-3214815;R-HSA-201722;R-HSA-606279;R-HSA-1221632;R-HSA-2559582;R-HSA-3214847;R-HSA-212300;R-HSA-977225;R-HSA-427413;R-HSA-171306;R-HSA-2559580;R-HSA-73728;R-HSA-427359;R-HSA-5625886;R-HSA-2299718;R-HSA-427389;R-HSA-5250924;R-HSA-5334118	23	0	No	NA	No	0	NF	1	DNA binding [GO:0003677]	3	nucleus [GO:0005634];nucleosome [GO:0000786];extracellular exosome [GO:0070062]
Q96KK5	Q93079	Histone H2A type 1-H (Histone H2A/s)	Histone H2B type 1-H (Histone H2B.j) (H2B/j)	0.44	927	1144	797	0	no	3	27	R-HSA-3214815;R-HSA-3214847	2	0	No	NA	No	0	NF	1	DNA binding [GO:0003677]	2	nucleosome [GO:0000786];extracellular exosome [GO:0070062]
P04350	Q5VTE0	Tubulin beta-4A chain (Tubulin 5 beta) (Tubulin beta-4 chain)	Putative elongation factor 1-alpha-like 3 (EF-1-alpha-like 3) (Eukaryotic elongation factor 1 A-like 3) (eEF1A-like 3) (Eukaryotic translation elongation factor 1 alpha-1 pseudogene 5)	0.44	1415	1465	1226	0	no	28	1	NF	0	NA	NA	NA	No	0	NF	2	GTPase activity [GO:0003924];GTP binding [GO:0005525]	2	nucleus [GO:0005634];extracellular exosome [GO:0070062]
Q96KK5	P58876	Histone H2A type 1-H (Histone H2A/s)	Histone H2B type 1-D (HIRA-interacting protein 2) (Histone H2B.1 B) (Histone H2B.b) (H2B/b)	0.44	927	1139	793	0	no	3	27	R-HSA-3214815;R-HSA-3214847	2	0	No	NA	No	0	NF	1	DNA binding [GO:0003677]	1	extracellular exosome [GO:0070062]
Q9Y2P5	P05181	Bile acyl-CoA synthetase (BACS) (EC 6.2.1.7) (Bile acid-CoA ligase) (BA-CoA ligase) (BAL) (Cholate--CoA ligase) (Fatty acid transport protein 5) (FATP-5) (Fatty-acid-coenzyme A ligase, very long-chain 3) (Solute carrier family 27 member 5) (Very long-chain acyl-CoA synthetase homolog 2) (VLCS-H2) (VLCSH2) (Very long-chain acyl-CoA synthetase-related protein) (VLACS-related) (VLACSR)	Cytochrome P450 2E1 (EC 1.14.13.-) (4-nitrophenol 2-hydroxylase) (EC 1.14.13.n7) (CYPIIE1) (Cytochrome P450-J) [Cleaved into: Cytochrome P450 2E1, N-terminally processed]	0.44	78	57	52	0	no	3	2	NF	0	0	No	NA	No	0	NF	0	NF	1	endoplasmic reticulum membrane [GO:0005789]
P08670	P62736	Vimentin	Actin, aortic smooth muscle (Alpha-actin-2) (Cell growth-inhibiting gene 46 protein)	0.44	1656	1743	1576	0	NA	2	1	NF	0	0	No	NA	No	1	positive regulation of gene expression [GO:0010628]	0	NF	3	cytoplasm [GO:0005737];cytosol [GO:0005829];extracellular exosome [GO:0070062]
P55268	P12110	Laminin subunit beta-2 (Laminin B1s chain) (Laminin-11 subunit beta) (Laminin-14 subunit beta) (Laminin-15 subunit beta) (Laminin-3 subunit beta) (Laminin-4 subunit beta) (Laminin-7 subunit beta) (Laminin-9 subunit beta) (S-laminin subunit beta) (S-LAM beta)	Collagen alpha-2(VI) chain	0.44	712	818	560	0	NA	3	7	R-HSA-3000178	1	0	No	NA	No	2	extracellular matrix organization [GO:0030198];cell adhesion [GO:0007155]	0	NF	2	extracellular region [GO:0005576];extracellular exosome [GO:0070062]
P23527	P0C0S8	Histone H2B type 1-O (Histone H2B.2) (Histone H2B.n) (H2B/n)	Histone H2A type 1 (H2A.1) (Histone H2A/p)	0.44	1141	927	796	0	no	27	3	R-HSA-3214847;R-HSA-3214815	2	0	No	NA	No	0	NF	1	DNA binding [GO:0003677]	2	nucleus [GO:0005634];nucleosome [GO:0000786]
Q04695	Q01546	Keratin, type I cytoskeletal 17 (39.1) (Cytokeratin-17) (CK-17) (Keratin-17) (K17)	Keratin, type II cytoskeletal 2 oral (Cytokeratin-2P) (CK-2P) (K2P) (Keratin-76) (K76) (Type-II keratin Kb9)	0.44	624	689	439	0	NA	0	0	NF	0	0	No	NA	No	1	epidermis development [GO:0008544]	0	NF	2	intermediate filament [GO:0005882];extracellular exosome [GO:0070062]
Q6FI13	Q8N257	Histone H2A type 2-A (Histone H2A.2) (Histone H2A/o)	Histone H2B type 3-B (H2B type 12)	0.44	923	1134	789	0	no	24	27	R-HSA-5578749;R-HSA-5617472;R-HSA-912446;R-HSA-2559586;R-HSA-73777;R-HSA-3214815;R-HSA-201722;R-HSA-606279;R-HSA-1221632;R-HSA-2559582;R-HSA-3214847;R-HSA-212300;R-HSA-977225;R-HSA-427413;R-HSA-171306;R-HSA-2559580;R-HSA-73728;R-HSA-427359;R-HSA-5625886;R-HSA-2299718;R-HSA-427389;R-HSA-5250924;R-HSA-5334118	23	0	No	NA	No	0	NF	1	DNA binding [GO:0003677]	1	nucleus [GO:0005634]
Q93079	Q99878	Histone H2B type 1-H (Histone H2B.j) (H2B/j)	Histone H2A type 1-J (Histone H2A/e)	0.44	1144	927	797	0	no	27	24	R-HSA-5617472;R-HSA-73777;R-HSA-606279;R-HSA-3214847;R-HSA-977225;R-HSA-427413;R-HSA-171306;R-HSA-5625886;R-HSA-5334118;R-HSA-5578749;R-HSA-2559586;R-HSA-912446;R-HSA-3214815;R-HSA-201722;R-HSA-1221632;R-HSA-2559582;R-HSA-212300;R-HSA-2559580;R-HSA-73728;R-HSA-427359;R-HSA-2299718;R-HSA-427389;R-HSA-5250924	23	0	No	NA	No	0	NF	1	DNA binding [GO:0003677]	3	nucleus [GO:0005634];nucleosome [GO:0000786];extracellular exosome [GO:0070062]
P20671	P57053	Histone H2A type 1-D (Histone H2A.3) (Histone H2A/g)	Histone H2B type F-S (Histone H2B.s) (H2B/s)	0.44	924	1142	793	0	no	24	25	R-HSA-5578749;R-HSA-5617472;R-HSA-912446;R-HSA-2559586;R-HSA-73777;R-HSA-201722;R-HSA-606279;R-HSA-1221632;R-HSA-2559582;R-HSA-212300;R-HSA-977225;R-HSA-427413;R-HSA-171306;R-HSA-2559580;R-HSA-73728;R-HSA-427359;R-HSA-5625886;R-HSA-2299718;R-HSA-427389;R-HSA-5250924;R-HSA-5334118	21	0	No	NA	No	0	NF	1	DNA binding [GO:0003677]	1	nucleus [GO:0005634]
P62807	P0C0S8	Histone H2B type 1-C/E/F/G/I (Histone H2B.1 A) (Histone H2B.a) (H2B/a) (Histone H2B.g) (H2B/g) (Histone H2B.h) (H2B/h) (Histone H2B.k) (H2B/k) (Histone H2B.l) (H2B/l)	Histone H2A type 1 (H2A.1) (Histone H2A/p)	0.44	1144	927	797	0	no	27	3	R-HSA-3214847;R-HSA-3214815	2	0	No	NA	No	0	NF	1	DNA binding [GO:0003677]	3	nucleus [GO:0005634];nucleosome [GO:0000786];extracellular exosome [GO:0070062]
P61026	P09211	Ras-related protein Rab-10	Glutathione S-transferase P (EC 2.5.1.18) (GST class-pi) (GSTP1-1)	0.44	677	724	475	0	no	1	2	NF	0	0	No	NA	Yes	1	cellular response to insulin stimulus [GO:0032869]	0	NF	1	extracellular exosome [GO:0070062]
P0C0S8	Q8N257	Histone H2A type 1 (H2A.1) (Histone H2A/p)	Histone H2B type 3-B (H2B type 12)	0.44	927	1134	792	0	no	3	27	R-HSA-3214815;R-HSA-3214847	2	0	No	NA	No	0	NF	1	DNA binding [GO:0003677]	1	nucleus [GO:0005634]
P62807	P16104	Histone H2B type 1-C/E/F/G/I (Histone H2B.1 A) (Histone H2B.a) (H2B/a) (Histone H2B.g) (H2B/g) (Histone H2B.h) (H2B/h) (Histone H2B.k) (H2B/k) (Histone H2B.l) (H2B/l)	Histone H2AX (H2a/x) (Histone H2A.X)	0.44	1144	912	783	0	no	27	26	R-HSA-5617472;R-HSA-73777;R-HSA-606279;R-HSA-5693565;R-HSA-977225;R-HSA-427413;R-HSA-171306;R-HSA-5693571;R-HSA-5625886;R-HSA-5334118;R-HSA-5578749;R-HSA-2559586;R-HSA-912446;R-HSA-69473;R-HSA-201722;R-HSA-1221632;R-HSA-2559582;R-HSA-212300;R-HSA-5693607;R-HSA-2559580;R-HSA-73728;R-HSA-427359;R-HSA-2299718;R-HSA-427389;R-HSA-5250924	25	0	No	NA	No	1	nucleosome assembly [GO:0006334]	1	DNA binding [GO:0003677]	4	nucleus [GO:0005634];nucleosome [GO:0000786];nucleoplasm [GO:0005654];extracellular exosome [GO:0070062]
Q96KK5	Q99877	Histone H2A type 1-H (Histone H2A/s)	Histone H2B type 1-N (Histone H2B.d) (H2B/d)	0.44	927	1140	793	0	no	3	27	R-HSA-3214815;R-HSA-3214847	2	0	No	NA	No	0	NF	1	DNA binding [GO:0003677]	2	nucleosome [GO:0000786];extracellular exosome [GO:0070062]
P0CG04	P0CG05	Ig lambda-1 chain C regions	Ig lambda-2 chain C regions	0.44	213	389	196	0	no	14	14	R-HSA-2871796;R-HSA-2730905;R-HSA-166663;R-HSA-173623;R-HSA-2871837;R-HSA-2168880;R-HSA-2454202;R-HSA-2029485;R-HSA-5690714;R-HSA-2871809;R-HSA-198933;R-HSA-2029481;R-HSA-983695;R-HSA-2029482	14	NA	NA	NA	No	12	regulation of immune response [GO:0050776];phagocytosis, recognition [GO:0006910];complement activation, classical pathway [GO:0006958];innate immune response [GO:0045087];defense response to bacterium [GO:0042742];Fc-epsilon receptor signaling pathway [GO:0038095];phagocytosis, engulfment [GO:0006911];B cell receptor signaling pathway [GO:0050853];Fc-gamma receptor signaling pathway involved in …	3	immunoglobulin receptor binding [GO:0034987];antigen binding [GO:0003823];serine-type endopeptidase activity [GO:0004252]	7	immunoglobulin complex, circulating [GO:0042571];extracellular exosome [GO:0070062];blood microparticle [GO:0072562];extracellular space [GO:0005615];external side of plasma membrane [GO:0009897];extracellular region [GO:0005576];plasma membrane [GO:0005886]
Q9H853	Q3ZCM7	Putative tubulin-like protein alpha-4B (Alpha-tubulin 4B)	Tubulin beta-8 chain	0.44	1161	1072	816	0	no	19	17	R-HSA-68877;R-HSA-190861;R-HSA-2467813;R-HSA-6807878;R-HSA-983189;R-HSA-1445148;R-HSA-190840;R-HSA-5617833;R-HSA-437239;R-HSA-380320;R-HSA-6811436;R-HSA-6811434;R-HSA-2500257;R-HSA-5663220;R-HSA-2132295;R-HSA-8852276;R-HSA-5626467	17	0	No	NA	No	1	microtubule-based process [GO:0007017]	3	GTPase activity [GO:0003924];structural constituent of cytoskeleton [GO:0005200];GTP binding [GO:0005525]	2	cytoplasm [GO:0005737];microtubule [GO:0005874]
P08670	P63267	Vimentin	Actin, gamma-enteric smooth muscle (Alpha-actin-3) (Gamma-2-actin) (Smooth muscle gamma-actin)	0.44	1656	1742	1575	0	NA	2	1	NF	0	0	No	NA	No	1	positive regulation of gene expression [GO:0010628]	0	NF	3	cytoplasm [GO:0005737];cytosol [GO:0005829];extracellular exosome [GO:0070062]
Q6FI13	Q5QNW6	Histone H2A type 2-A (Histone H2A.2) (Histone H2A/o)	Histone H2B type 2-F	0.44	923	1144	794	0	no	24	2	R-HSA-3214815;R-HSA-3214847	2	0	No	NA	No	0	NF	1	DNA binding [GO:0003677]	2	nucleus [GO:0005634];extracellular exosome [GO:0070062]
P62820	P51149	Ras-related protein Rab-1A (YPT1-related protein)	Ras-related protein Rab-7a	0.44	755	632	463	0	yes	4	1	NF	0	0	No	NA	No	2	endocytosis [GO:0006897];small GTPase mediated signal transduction [GO:0007264]	2	GTPase activity [GO:0003924];GTP binding [GO:0005525]	3	cytosol [GO:0005829];Golgi apparatus [GO:0005794];extracellular exosome [GO:0070062]
P01598	P01610	Ig kappa chain V-I region EU	Ig kappa chain V-I region WEA	0.44	81	99	58	0	no	14	14	R-HSA-2871796;R-HSA-2730905;R-HSA-166663;R-HSA-173623;R-HSA-2871837;R-HSA-2168880;R-HSA-2454202;R-HSA-2029485;R-HSA-5690714;R-HSA-2871809;R-HSA-198933;R-HSA-2029481;R-HSA-983695;R-HSA-2029482	14	NA	NA	NA	No	0	NA	0	NA	0	NA
P09651	P22626	Heterogeneous nuclear ribonucleoprotein A1 (hnRNP A1) (Helix-destabilizing protein) (Single-strand RNA-binding protein) (hnRNP core protein A1) [Cleaved into: Heterogeneous nuclear ribonucleoprotein A1, N-terminally processed]	Heterogeneous nuclear ribonucleoproteins A2/B1 (hnRNP A2/B1)	0.44	699	1039	643	1	yes	3	2	R-HSA-72203;R-HSA-72163	2	0	yes	1181_C complex spliceosome	No	3	gene expression [GO:0010467];mRNA processing [GO:0006397];mRNA splicing, via spliceosome [GO:0000398]	3	nucleotide binding [GO:0000166];poly(A) RNA binding [GO:0044822];RNA binding [GO:0003723]	8	extracellular exosome [GO:0070062];spliceosomal complex [GO:0005681];catalytic step 2 spliceosome [GO:0071013];nucleoplasm [GO:0005654];cytoplasm [GO:0005737];membrane [GO:0016020];nucleus [GO:0005634];intracellular ribonucleoprotein complex [GO:0030529]
Q96KK5	Q8N257	Histone H2A type 1-H (Histone H2A/s)	Histone H2B type 3-B (H2B type 12)	0.44	927	1134	792	0	no	3	27	R-HSA-3214815;R-HSA-3214847	2	0	No	NA	No	0	NF	1	DNA binding [GO:0003677]	0	NF
P0C0S8	Q5QNW6	Histone H2A type 1 (H2A.1) (Histone H2A/p)	Histone H2B type 2-F	0.44	927	1144	797	0	no	3	2	R-HSA-3214815;R-HSA-3214847	2	0	No	NA	No	0	NF	1	DNA binding [GO:0003677]	2	nucleus [GO:0005634];extracellular exosome [GO:0070062]
Q13885	Q5VTE0	Tubulin beta-2A chain (Tubulin beta class IIa)	Putative elongation factor 1-alpha-like 3 (EF-1-alpha-like 3) (Eukaryotic elongation factor 1 A-like 3) (eEF1A-like 3) (Eukaryotic translation elongation factor 1 alpha-1 pseudogene 5)	0.44	1484	1465	1279	0	no	22	1	NF	0	NA	NA	NA	No	0	NF	2	GTPase activity [GO:0003924];GTP binding [GO:0005525]	3	nucleus [GO:0005634];cytoplasm [GO:0005737];extracellular exosome [GO:0070062]
Q14204	Q15149	Cytoplasmic dynein 1 heavy chain 1 (Cytoplasmic dynein heavy chain 1) (Dynein heavy chain, cytosolic)	Plectin (PCN) (PLTN) (Hemidesmosomal protein 1) (HD1) (Plectin-1)	0.44	1154	1387	1085	0	NA	9	3	NF	0	0	No	NA	No	0	NF	1	poly(A) RNA binding [GO:0044822]	3	extracellular matrix [GO:0031012];cytosol [GO:0005829];extracellular exosome [GO:0070062]
Q9BVA1	P06576	Tubulin beta-2B chain	ATP synthase subunit beta, mitochondrial (EC 3.6.3.14)	0.44	1478	1229	1102	0	no	22	3	NF	0	0	No	NF	No	0	NF	0	NF	1	nucleus [GO:0005634]
O60814	Q96KK5	Histone H2B type 1-K (H2B K) (HIRA-interacting protein 1)	Histone H2A type 1-H (Histone H2A/s)	0.44	1143	927	797	0	no	27	3	R-HSA-3214847;R-HSA-3214815	2	0	No	NA	No	0	NF	1	DNA binding [GO:0003677]	0	NF
Q93079	P0C0S8	Histone H2B type 1-H (Histone H2B.j) (H2B/j)	Histone H2A type 1 (H2A.1) (Histone H2A/p)	0.44	1144	927	797	0	no	27	3	R-HSA-3214847;R-HSA-3214815	2	0	No	NA	No	0	NF	1	DNA binding [GO:0003677]	3	nucleus [GO:0005634];nucleosome [GO:0000786];extracellular exosome [GO:0070062]
P62807	Q99878	Histone H2B type 1-C/E/F/G/I (Histone H2B.1 A) (Histone H2B.a) (H2B/a) (Histone H2B.g) (H2B/g) (Histone H2B.h) (H2B/h) (Histone H2B.k) (H2B/k) (Histone H2B.l) (H2B/l)	Histone H2A type 1-J (Histone H2A/e)	0.44	1144	927	797	0	no	27	24	R-HSA-5617472;R-HSA-73777;R-HSA-606279;R-HSA-3214847;R-HSA-977225;R-HSA-427413;R-HSA-171306;R-HSA-5625886;R-HSA-5334118;R-HSA-5578749;R-HSA-2559586;R-HSA-912446;R-HSA-3214815;R-HSA-201722;R-HSA-1221632;R-HSA-2559582;R-HSA-212300;R-HSA-2559580;R-HSA-73728;R-HSA-427359;R-HSA-2299718;R-HSA-427389;R-HSA-5250924	23	0	No	NA	No	0	NF	1	DNA binding [GO:0003677]	3	nucleus [GO:0005634];nucleosome [GO:0000786];extracellular exosome [GO:0070062]
P20671	P23527	Histone H2A type 1-D (Histone H2A.3) (Histone H2A/g)	Histone H2B type 1-O (Histone H2B.2) (Histone H2B.n) (H2B/n)	0.44	924	1141	793	0	no	24	27	R-HSA-5578749;R-HSA-5617472;R-HSA-912446;R-HSA-2559586;R-HSA-73777;R-HSA-3214815;R-HSA-201722;R-HSA-606279;R-HSA-1221632;R-HSA-2559582;R-HSA-3214847;R-HSA-212300;R-HSA-977225;R-HSA-427413;R-HSA-171306;R-HSA-2559580;R-HSA-73728;R-HSA-427359;R-HSA-5625886;R-HSA-2299718;R-HSA-427389;R-HSA-5250924;R-HSA-5334118	23	0	No	NA	No	0	NF	1	DNA binding [GO:0003677]	2	nucleus [GO:0005634];nucleosome [GO:0000786]
P62807	Q6FI13	Histone H2B type 1-C/E/F/G/I (Histone H2B.1 A) (Histone H2B.a) (H2B/a) (Histone H2B.g) (H2B/g) (Histone H2B.h) (H2B/h) (Histone H2B.k) (H2B/k) (Histone H2B.l) (H2B/l)	Histone H2A type 2-A (Histone H2A.2) (Histone H2A/o)	0.44	1144	923	794	0	no	27	24	R-HSA-5617472;R-HSA-73777;R-HSA-606279;R-HSA-3214847;R-HSA-977225;R-HSA-427413;R-HSA-171306;R-HSA-5625886;R-HSA-5334118;R-HSA-5578749;R-HSA-2559586;R-HSA-912446;R-HSA-3214815;R-HSA-201722;R-HSA-1221632;R-HSA-2559582;R-HSA-212300;R-HSA-2559580;R-HSA-73728;R-HSA-427359;R-HSA-2299718;R-HSA-427389;R-HSA-5250924	23	0	No	NA	No	0	NF	1	DNA binding [GO:0003677]	3	nucleus [GO:0005634];nucleosome [GO:0000786];extracellular exosome [GO:0070062]
Q05639	A5A3E0	Elongation factor 1-alpha 2 (EF-1-alpha-2) (Eukaryotic elongation factor 1 A-2) (eEF1A-2) (Statin-S1)	POTE ankyrin domain family member F (ANKRD26-like family C member 1B) (Chimeric POTE-actin protein)	0.44	1397	1691	1336	0	no	1	0	NF	0	0	No	NA	No	0	NF	0	NF	0	NF
P57053	Q16777	Histone H2B type F-S (Histone H2B.s) (H2B/s)	Histone H2A type 2-C (Histone H2A-GL101) (Histone H2A/q)	0.44	1142	922	792	0	no	25	24	R-HSA-5617472;R-HSA-73777;R-HSA-606279;R-HSA-977225;R-HSA-427413;R-HSA-171306;R-HSA-5625886;R-HSA-5334118;R-HSA-5578749;R-HSA-2559586;R-HSA-912446;R-HSA-201722;R-HSA-1221632;R-HSA-2559582;R-HSA-212300;R-HSA-2559580;R-HSA-73728;R-HSA-427359;R-HSA-2299718;R-HSA-427389;R-HSA-5250924	21	0	No	NA	No	0	NF	1	DNA binding [GO:0003677]	1	nucleus [GO:0005634]
O60814	Q99878	Histone H2B type 1-K (H2B K) (HIRA-interacting protein 1)	Histone H2A type 1-J (Histone H2A/e)	0.44	1143	927	797	0	no	27	24	R-HSA-5617472;R-HSA-73777;R-HSA-606279;R-HSA-3214847;R-HSA-977225;R-HSA-427413;R-HSA-171306;R-HSA-5625886;R-HSA-5334118;R-HSA-5578749;R-HSA-2559586;R-HSA-912446;R-HSA-3214815;R-HSA-201722;R-HSA-1221632;R-HSA-2559582;R-HSA-212300;R-HSA-2559580;R-HSA-73728;R-HSA-427359;R-HSA-2299718;R-HSA-427389;R-HSA-5250924	23	0	No	NA	No	0	NF	1	DNA binding [GO:0003677]	1	nucleus [GO:0005634]
Q8N257	Q16777	Histone H2B type 3-B (H2B type 12)	Histone H2A type 2-C (Histone H2A-GL101) (Histone H2A/q)	0.44	1134	922	788	0	no	27	24	R-HSA-5617472;R-HSA-73777;R-HSA-606279;R-HSA-3214847;R-HSA-977225;R-HSA-427413;R-HSA-171306;R-HSA-5625886;R-HSA-5334118;R-HSA-5578749;R-HSA-2559586;R-HSA-912446;R-HSA-3214815;R-HSA-201722;R-HSA-1221632;R-HSA-2559582;R-HSA-212300;R-HSA-2559580;R-HSA-73728;R-HSA-427359;R-HSA-2299718;R-HSA-427389;R-HSA-5250924	23	0	No	NA	No	0	NF	1	DNA binding [GO:0003677]	1	nucleus [GO:0005634]
Q13885	P06576	Tubulin beta-2A chain (Tubulin beta class IIa)	ATP synthase subunit beta, mitochondrial (EC 3.6.3.14)	0.44	1484	1229	1104	0	no	22	3	NF	0	0	No	NA	No	0	NF	0	NF	2	nucleus [GO:0005634];extracellular exosome [GO:0070062]
Q92752	P78357	Tenascin-R (TN-R) (Janusin) (Restrictin)	Contactin-associated protein 1 (Caspr) (Caspr1) (Neurexin IV) (Neurexin-4) (p190)	0.44	102	74	60	0	no	1	1	NF	0	0	No	NA	No	2	neuromuscular process controlling balance [GO:0050885];cell adhesion [GO:0007155]	0	NF	0	NF
Q6FI13	P57053	Histone H2A type 2-A (Histone H2A.2) (Histone H2A/o)	Histone H2B type F-S (Histone H2B.s) (H2B/s)	0.44	923	1142	793	0	no	24	25	R-HSA-5578749;R-HSA-5617472;R-HSA-912446;R-HSA-2559586;R-HSA-73777;R-HSA-201722;R-HSA-606279;R-HSA-1221632;R-HSA-2559582;R-HSA-212300;R-HSA-977225;R-HSA-427413;R-HSA-171306;R-HSA-2559580;R-HSA-73728;R-HSA-427359;R-HSA-5625886;R-HSA-2299718;R-HSA-427389;R-HSA-5250924;R-HSA-5334118	21	0	No	NA	No	0	NF	1	DNA binding [GO:0003677]	1	nucleus [GO:0005634]
P31513	P33261	Dimethylaniline monooxygenase [N-oxide-forming] 3 (EC 1.14.13.8) (Dimethylaniline oxidase 3) (FMO II) (FMO form 2) (Hepatic flavin-containing monooxygenase 3) (FMO 3) (Trimethylamine monooxygenase) (EC 1.14.13.148)	Cytochrome P450 2C19 (EC 1.14.13.-) ((R)-limonene 6-monooxygenase) (EC 1.14.13.80) ((S)-limonene 6-monooxygenase) (EC 1.14.13.48) ((S)-limonene 7-monooxygenase) (EC 1.14.13.49) (CYPIIC17) (CYPIIC19) (Cytochrome P450-11A) (Cytochrome P450-254C) (Mephenytoin 4-hydroxylase)	0.44	67	57	50	0	no	2	4	NF	0	0	No	NA	No	3	oxidation-reduction process [GO:0055114];drug metabolic process [GO:0017144];xenobiotic metabolic process [GO:0006805]	1	monooxygenase activity [GO:0004497]	3	organelle membrane [GO:0031090];intracellular membrane-bounded organelle [GO:0043231];endoplasmic reticulum membrane [GO:0005789]
Q9BVA1	Q5VTE0	Tubulin beta-2B chain	Putative elongation factor 1-alpha-like 3 (EF-1-alpha-like 3) (Eukaryotic elongation factor 1 A-like 3) (eEF1A-like 3) (Eukaryotic translation elongation factor 1 alpha-1 pseudogene 5)	0.44	1478	1465	1275	0	no	22	1	NF	0	NA	NA	NA	No	0	NF	2	GTPase activity [GO:0003924];GTP binding [GO:0005525]	2	nucleus [GO:0005634];cytoplasm [GO:0005737]
P0CG38	Q71U36	POTE ankyrin domain family member I	Tubulin alpha-1A chain (Alpha-tubulin 3) (Tubulin B-alpha-1) (Tubulin alpha-3 chain)	0.44	1639	1654	1521	0	no	0	28	NF	0	0	No	NA	No	0	NF	0	NF	1	extracellular exosome [GO:0070062]
Q16777	Q16778	Histone H2A type 2-C (Histone H2A-GL101) (Histone H2A/q)	Histone H2B type 2-E (Histone H2B-GL105) (Histone H2B.q) (H2B/q)	0.44	922	1143	794	0	yes	24	27	R-HSA-5578749;R-HSA-5617472;R-HSA-912446;R-HSA-2559586;R-HSA-73777;R-HSA-3214815;R-HSA-201722;R-HSA-606279;R-HSA-1221632;R-HSA-2559582;R-HSA-3214847;R-HSA-212300;R-HSA-977225;R-HSA-427413;R-HSA-171306;R-HSA-2559580;R-HSA-73728;R-HSA-427359;R-HSA-5625886;R-HSA-2299718;R-HSA-427389;R-HSA-5250924;R-HSA-5334118	23	0	No	NA	No	0	NF	1	DNA binding [GO:0003677]	3	nucleus [GO:0005634];nucleosome [GO:0000786];extracellular exosome [GO:0070062]
Q6PEY2	Q9NY65	Tubulin alpha-3E chain (Alpha-tubulin 3E)	Tubulin alpha-8 chain (Alpha-tubulin 8) (Tubulin alpha chain-like 2)	0.44	1285	1054	889	0	no	19	19	R-HSA-68877;R-HSA-190861;R-HSA-2467813;R-HSA-6807878;R-HSA-983189;R-HSA-1445148;R-HSA-190840;R-HSA-5617833;R-HSA-437239;R-HSA-380320;R-HSA-389960;R-HSA-6811436;R-HSA-6811434;R-HSA-2500257;R-HSA-5663220;R-HSA-389977;R-HSA-2132295;R-HSA-8852276;R-HSA-5626467	19	0	yes	NA	No	1	microtubule-based process [GO:0007017]	3	GTPase activity [GO:0003924];structural constituent of cytoskeleton [GO:0005200];GTP binding [GO:0005525]	2	cytoplasm [GO:0005737];microtubule [GO:0005874]
P62807	Q9BTM1	Histone H2B type 1-C/E/F/G/I (Histone H2B.1 A) (Histone H2B.a) (H2B/a) (Histone H2B.g) (H2B/g) (Histone H2B.h) (H2B/h) (Histone H2B.k) (H2B/k) (Histone H2B.l) (H2B/l)	Histone H2A.J (H2a/j)	0.44	1144	926	796	0	no	27	0	NF	0	0	No	NA	No	0	NF	1	DNA binding [GO:0003677]	2	nucleosome [GO:0000786];extracellular exosome [GO:0070062]
O95678	P19012	Keratin, type II cytoskeletal 75 (Cytokeratin-75) (CK-75) (Keratin-6 hair follicle) (hK6hf) (Keratin-75) (K75) (Type II keratin-K6hf) (Type-II keratin Kb18)	Keratin, type I cytoskeletal 15 (Cytokeratin-15) (CK-15) (Keratin-15) (K15)	0.44	819	593	468	0	no	0	0	NF	0	0	No	NA	No	0	NF	0	NF	2	intermediate filament [GO:0005882];extracellular exosome [GO:0070062]
Q99878	Q5QNW6	Histone H2A type 1-J (Histone H2A/e)	Histone H2B type 2-F	0.44	927	1144	797	0	no	24	2	R-HSA-3214815;R-HSA-3214847	2	0	No	NA	No	0	NF	1	DNA binding [GO:0003677]	2	nucleus [GO:0005634];extracellular exosome [GO:0070062]
Q99878	P58876	Histone H2A type 1-J (Histone H2A/e)	Histone H2B type 1-D (HIRA-interacting protein 2) (Histone H2B.1 B) (Histone H2B.b) (H2B/b)	0.44	927	1139	793	0	no	24	27	R-HSA-5578749;R-HSA-5617472;R-HSA-912446;R-HSA-2559586;R-HSA-73777;R-HSA-3214815;R-HSA-201722;R-HSA-606279;R-HSA-1221632;R-HSA-2559582;R-HSA-3214847;R-HSA-212300;R-HSA-977225;R-HSA-427413;R-HSA-171306;R-HSA-2559580;R-HSA-73728;R-HSA-427359;R-HSA-5625886;R-HSA-2299718;R-HSA-427389;R-HSA-5250924;R-HSA-5334118	23	0	No	NA	No	0	NF	1	DNA binding [GO:0003677]	2	nucleus [GO:0005634];extracellular exosome [GO:0070062]
Q16778	Q9BTM1	Histone H2B type 2-E (Histone H2B-GL105) (Histone H2B.q) (H2B/q)	Histone H2A.J (H2a/j)	0.44	1143	926	797	0	no	27	0	NF	0	0	No	NA	No	0	NF	1	DNA binding [GO:0003677]	2	nucleosome [GO:0000786];extracellular exosome [GO:0070062]
Q96KK5	P57053	Histone H2A type 1-H (Histone H2A/s)	Histone H2B type F-S (Histone H2B.s) (H2B/s)	0.44	927	1142	796	0	no	3	25	NF	0	0	No	NA	No	0	NF	1	DNA binding [GO:0003677]	0	NF
P0CG38	Q05639	POTE ankyrin domain family member I	Elongation factor 1-alpha 2 (EF-1-alpha-2) (Eukaryotic elongation factor 1 A-2) (eEF1A-2) (Statin-S1)	0.44	1639	1397	1303	0	no	0	1	NF	0	0	No	NA	No	0	NF	0	NF	0	NF
Q96KK5	Q5QNW6	Histone H2A type 1-H (Histone H2A/s)	Histone H2B type 2-F	0.44	927	1144	797	0	no	3	2	R-HSA-3214815;R-HSA-3214847	2	0	No	NA	No	0	NF	1	DNA binding [GO:0003677]	1	extracellular exosome [GO:0070062]
P08670	P68371	Vimentin	Tubulin beta-4B chain (Tubulin beta-2 chain) (Tubulin beta-2C chain)	0.44	1656	1553	1439	0	NA	2	28	NF	0	0	No	NA	No	1	movement of cell or subcellular component [GO:0006928]	2	structural constituent of cytoskeleton [GO:0005200];double-stranded RNA binding [GO:0003725]	4	extracellular matrix [GO:0031012];extracellular exosome [GO:0070062];cytoskeleton [GO:0005856];cytosol [GO:0005829]
P0C0S8	P58876	Histone H2A type 1 (H2A.1) (Histone H2A/p)	Histone H2B type 1-D (HIRA-interacting protein 2) (Histone H2B.1 B) (Histone H2B.b) (H2B/b)	0.44	927	1139	793	0	no	3	27	R-HSA-3214815;R-HSA-3214847	2	0	No	NA	No	0	NF	1	DNA binding [GO:0003677]	2	nucleus [GO:0005634];extracellular exosome [GO:0070062]
P21796	P40926	Voltage-dependent anion-selective channel protein 1 (VDAC-1) (hVDAC1) (Outer mitochondrial membrane protein porin 1) (Plasmalemmal porin) (Porin 31HL) (Porin 31HM)	Malate dehydrogenase, mitochondrial (EC 1.1.1.37)	0.44	860	928	676	0	no	2	2	NF	0	0	No	NA	No	0	NF	0	NF	6	extracellular exosome [GO:0070062];mitochondrion [GO:0005739];myelin sheath [GO:0043209];mitochondrial inner membrane [GO:0005743];nucleus [GO:0005634];plasma membrane [GO:0005886]
Q5QNW6	Q9BTM1	Histone H2B type 2-F	Histone H2A.J (H2a/j)	0.44	1144	926	796	0	no	2	0	NF	0	0	No	NA	No	0	NF	1	DNA binding [GO:0003677]	1	extracellular exosome [GO:0070062]
P06899	Q93077	Histone H2B type 1-J (Histone H2B.1) (Histone H2B.r) (H2B/r)	Histone H2A type 1-C (Histone H2A/l)	0.44	1142	921	792	0	no	27	24	R-HSA-5617472;R-HSA-73777;R-HSA-606279;R-HSA-3214847;R-HSA-977225;R-HSA-427413;R-HSA-171306;R-HSA-5625886;R-HSA-5334118;R-HSA-5578749;R-HSA-2559586;R-HSA-912446;R-HSA-3214815;R-HSA-201722;R-HSA-1221632;R-HSA-2559582;R-HSA-212300;R-HSA-2559580;R-HSA-73728;R-HSA-427359;R-HSA-2299718;R-HSA-427389;R-HSA-5250924	23	0	No	NA	No	0	NF	1	DNA binding [GO:0003677]	2	nucleus [GO:0005634];nucleosome [GO:0000786]
Q92928	P51149	Putative Ras-related protein Rab-1C (hRab1c)	Ras-related protein Rab-7a	0.44	734	632	475	0	no	0	1	NF	0	NA	NA	NA	No	2	small GTPase mediated signal transduction [GO:0007264];protein transport [GO:0015031]	1	GTP binding [GO:0005525]	0	NF
P23527	Q99878	Histone H2B type 1-O (Histone H2B.2) (Histone H2B.n) (H2B/n)	Histone H2A type 1-J (Histone H2A/e)	0.44	1141	927	796	0	no	27	24	R-HSA-5617472;R-HSA-73777;R-HSA-606279;R-HSA-3214847;R-HSA-977225;R-HSA-427413;R-HSA-171306;R-HSA-5625886;R-HSA-5334118;R-HSA-5578749;R-HSA-2559586;R-HSA-912446;R-HSA-3214815;R-HSA-201722;R-HSA-1221632;R-HSA-2559582;R-HSA-212300;R-HSA-2559580;R-HSA-73728;R-HSA-427359;R-HSA-2299718;R-HSA-427389;R-HSA-5250924	23	0	No	NA	No	0	NF	1	DNA binding [GO:0003677]	2	nucleus [GO:0005634];nucleosome [GO:0000786]
P40926	P07195	Malate dehydrogenase, mitochondrial (EC 1.1.1.37)	L-lactate dehydrogenase B chain (LDH-B) (EC 1.1.1.27) (LDH heart subunit) (LDH-H) (Renal carcinoma antigen NY-REN-46)	0.44	928	1087	753	0	no	2	1	NF	0	0	No	NA	No	0	NF	0	NF	3	myelin sheath [GO:0043209];extracellular exosome [GO:0070062];mitochondrion [GO:0005739]
Q05639	Q13748	Elongation factor 1-alpha 2 (EF-1-alpha-2) (Eukaryotic elongation factor 1 A-2) (eEF1A-2) (Statin-S1)	Tubulin alpha-3C/D chain (Alpha-tubulin 2) (Alpha-tubulin 3C/D) (Tubulin alpha-2 chain)	0.44	1397	1599	1310	0	no	1	22	NF	0	0	No	NA	No	0	NF	2	GTPase activity [GO:0003924];GTP binding [GO:0005525]	1	cytoplasm [GO:0005737]
P16104	Q16778	Histone H2AX (H2a/x) (Histone H2A.X)	Histone H2B type 2-E (Histone H2B-GL105) (Histone H2B.q) (H2B/q)	0.44	912	1143	784	0	yes	26	27	R-HSA-5617472;R-HSA-73777;R-HSA-606279;R-HSA-5693565;R-HSA-977225;R-HSA-427413;R-HSA-171306;R-HSA-5693571;R-HSA-5625886;R-HSA-5334118;R-HSA-5578749;R-HSA-2559586;R-HSA-912446;R-HSA-69473;R-HSA-201722;R-HSA-1221632;R-HSA-2559582;R-HSA-212300;R-HSA-5693607;R-HSA-2559580;R-HSA-73728;R-HSA-427359;R-HSA-2299718;R-HSA-427389;R-HSA-5250924	25	0	No	NA	No	1	nucleosome assembly [GO:0006334]	1	DNA binding [GO:0003677]	4	nucleus [GO:0005634];nucleosome [GO:0000786];nucleoplasm [GO:0005654];extracellular exosome [GO:0070062]
Q96KK5	P23527	Histone H2A type 1-H (Histone H2A/s)	Histone H2B type 1-O (Histone H2B.2) (Histone H2B.n) (H2B/n)	0.44	927	1141	796	0	no	3	27	R-HSA-3214815;R-HSA-3214847	2	0	No	NA	No	0	NF	1	DNA binding [GO:0003677]	1	nucleosome [GO:0000786]
O60814	P16104	Histone H2B type 1-K (H2B K) (HIRA-interacting protein 1)	Histone H2AX (H2a/x) (Histone H2A.X)	0.44	1143	912	783	0	no	27	26	R-HSA-5617472;R-HSA-73777;R-HSA-606279;R-HSA-5693565;R-HSA-977225;R-HSA-427413;R-HSA-171306;R-HSA-5693571;R-HSA-5625886;R-HSA-5334118;R-HSA-5578749;R-HSA-2559586;R-HSA-912446;R-HSA-69473;R-HSA-201722;R-HSA-1221632;R-HSA-2559582;R-HSA-212300;R-HSA-5693607;R-HSA-2559580;R-HSA-73728;R-HSA-427359;R-HSA-2299718;R-HSA-427389;R-HSA-5250924	25	0	No	NA	No	1	nucleosome assembly [GO:0006334]	1	DNA binding [GO:0003677]	2	nucleus [GO:0005634];nucleoplasm [GO:0005654]
O60814	Q6FI13	Histone H2B type 1-K (H2B K) (HIRA-interacting protein 1)	Histone H2A type 2-A (Histone H2A.2) (Histone H2A/o)	0.44	1143	923	794	0	no	27	24	R-HSA-5617472;R-HSA-73777;R-HSA-606279;R-HSA-3214847;R-HSA-977225;R-HSA-427413;R-HSA-171306;R-HSA-5625886;R-HSA-5334118;R-HSA-5578749;R-HSA-2559586;R-HSA-912446;R-HSA-3214815;R-HSA-201722;R-HSA-1221632;R-HSA-2559582;R-HSA-212300;R-HSA-2559580;R-HSA-73728;R-HSA-427359;R-HSA-2299718;R-HSA-427389;R-HSA-5250924	23	0	No	NA	No	0	NF	1	DNA binding [GO:0003677]	1	nucleus [GO:0005634]
P23527	Q16777	Histone H2B type 1-O (Histone H2B.2) (Histone H2B.n) (H2B/n)	Histone H2A type 2-C (Histone H2A-GL101) (Histone H2A/q)	0.44	1141	922	792	0	no	27	24	R-HSA-5617472;R-HSA-73777;R-HSA-606279;R-HSA-3214847;R-HSA-977225;R-HSA-427413;R-HSA-171306;R-HSA-5625886;R-HSA-5334118;R-HSA-5578749;R-HSA-2559586;R-HSA-912446;R-HSA-3214815;R-HSA-201722;R-HSA-1221632;R-HSA-2559582;R-HSA-212300;R-HSA-2559580;R-HSA-73728;R-HSA-427359;R-HSA-2299718;R-HSA-427389;R-HSA-5250924	23	0	No	NA	No	0	NF	1	DNA binding [GO:0003677]	2	nucleus [GO:0005634];nucleosome [GO:0000786]
Q93079	Q16777	Histone H2B type 1-H (Histone H2B.j) (H2B/j)	Histone H2A type 2-C (Histone H2A-GL101) (Histone H2A/q)	0.44	1144	922	793	0	no	27	24	R-HSA-5617472;R-HSA-73777;R-HSA-606279;R-HSA-3214847;R-HSA-977225;R-HSA-427413;R-HSA-171306;R-HSA-5625886;R-HSA-5334118;R-HSA-5578749;R-HSA-2559586;R-HSA-912446;R-HSA-3214815;R-HSA-201722;R-HSA-1221632;R-HSA-2559582;R-HSA-212300;R-HSA-2559580;R-HSA-73728;R-HSA-427359;R-HSA-2299718;R-HSA-427389;R-HSA-5250924	23	0	No	NA	No	0	NF	1	DNA binding [GO:0003677]	3	nucleus [GO:0005634];nucleosome [GO:0000786];extracellular exosome [GO:0070062]
P0C0S8	P57053	Histone H2A type 1 (H2A.1) (Histone H2A/p)	Histone H2B type F-S (Histone H2B.s) (H2B/s)	0.44	927	1142	796	0	no	3	25	NF	0	0	No	NA	No	0	NF	1	DNA binding [GO:0003677]	1	nucleus [GO:0005634]
P12882	Q14896	Myosin-1 (Myosin heavy chain 1) (Myosin heavy chain 2x) (MyHC-2x) (Myosin heavy chain IIx/d) (MyHC-IIx/d) (Myosin heavy chain, skeletal muscle, adult 1)	Myosin-binding protein C, cardiac-type (Cardiac MyBP-C) (C-protein, cardiac muscle isoform)	0.44	396	193	189	0	no	1	1	NF	0	0	No	NA	No	0	NF	0	NF	1	A band [GO:0031672]
P33778	Q99878	Histone H2B type 1-B (Histone H2B.1) (Histone H2B.f) (H2B/f)	Histone H2A type 1-J (Histone H2A/e)	0.44	1138	927	793	0	no	27	24	R-HSA-5617472;R-HSA-73777;R-HSA-606279;R-HSA-3214847;R-HSA-977225;R-HSA-427413;R-HSA-171306;R-HSA-5625886;R-HSA-5334118;R-HSA-5578749;R-HSA-2559586;R-HSA-912446;R-HSA-3214815;R-HSA-201722;R-HSA-1221632;R-HSA-2559582;R-HSA-212300;R-HSA-2559580;R-HSA-73728;R-HSA-427359;R-HSA-2299718;R-HSA-427389;R-HSA-5250924	23	0	No	NA	No	0	NF	1	DNA binding [GO:0003677]	2	nucleus [GO:0005634];nucleosome [GO:0000786]
P06899	Q9BTM1	Histone H2B type 1-J (Histone H2B.1) (Histone H2B.r) (H2B/r)	Histone H2A.J (H2a/j)	0.44	1142	926	797	0	no	27	0	NF	0	0	No	NA	No	0	NF	1	DNA binding [GO:0003677]	1	nucleosome [GO:0000786]
Q6S8J3	Q9NY65	POTE ankyrin domain family member E (ANKRD26-like family C member 1A) (Prostate, ovary, testis-expressed protein on chromosome 2) (POTE-2)	Tubulin alpha-8 chain (Alpha-tubulin 8) (Tubulin alpha chain-like 2)	0.44	1710	1528	1453	0	no	0	19	NF	0	0	No	NA	No	0	NF	0	NF	0	NF
P06899	P16104	Histone H2B type 1-J (Histone H2B.1) (Histone H2B.r) (H2B/r)	Histone H2AX (H2a/x) (Histone H2A.X)	0.44	1142	912	784	0	no	27	26	R-HSA-5617472;R-HSA-73777;R-HSA-606279;R-HSA-5693565;R-HSA-977225;R-HSA-427413;R-HSA-171306;R-HSA-5693571;R-HSA-5625886;R-HSA-5334118;R-HSA-5578749;R-HSA-2559586;R-HSA-912446;R-HSA-69473;R-HSA-201722;R-HSA-1221632;R-HSA-2559582;R-HSA-212300;R-HSA-5693607;R-HSA-2559580;R-HSA-73728;R-HSA-427359;R-HSA-2299718;R-HSA-427389;R-HSA-5250924	25	0	No	NA	No	1	nucleosome assembly [GO:0006334]	1	DNA binding [GO:0003677]	3	nucleus [GO:0005634];nucleosome [GO:0000786];nucleoplasm [GO:0005654]
P13647	P48668	Keratin, type II cytoskeletal 5 (58 kDa cytokeratin) (Cytokeratin-5) (CK-5) (Keratin-5) (K5) (Type-II keratin Kb5)	Keratin, type II cytoskeletal 6C (Cytokeratin-6C) (CK-6C) (Cytokeratin-6E) (CK-6E) (Keratin K6h) (Keratin-6C) (K6C) (Type-II keratin Kb12)	0.44	443	491	335	0	no	1	0	NF	0	0	yes	NA	No	0	NF	0	NF	3	intermediate filament [GO:0005882];keratin filament [GO:0045095];extracellular exosome [GO:0070062]
P0CG38	P68363	POTE ankyrin domain family member I	Tubulin alpha-1B chain (Alpha-tubulin ubiquitous) (Tubulin K-alpha-1) (Tubulin alpha-ubiquitous chain)	0.44	1639	1662	1529	0	no	0	21	NF	0	0	No	NA	No	0	NF	0	NF	1	extracellular exosome [GO:0070062]
P33778	Q96KK5	Histone H2B type 1-B (Histone H2B.1) (Histone H2B.f) (H2B/f)	Histone H2A type 1-H (Histone H2A/s)	0.44	1138	927	793	0	no	27	3	R-HSA-3214847;R-HSA-3214815	2	0	No	NA	No	0	NF	1	DNA binding [GO:0003677]	1	nucleosome [GO:0000786]
Q6FI13	Q16778	Histone H2A type 2-A (Histone H2A.2) (Histone H2A/o)	Histone H2B type 2-E (Histone H2B-GL105) (Histone H2B.q) (H2B/q)	0.44	923	1143	795	0	no	24	27	R-HSA-5578749;R-HSA-5617472;R-HSA-912446;R-HSA-2559586;R-HSA-73777;R-HSA-3214815;R-HSA-201722;R-HSA-606279;R-HSA-1221632;R-HSA-2559582;R-HSA-3214847;R-HSA-212300;R-HSA-977225;R-HSA-427413;R-HSA-171306;R-HSA-2559580;R-HSA-73728;R-HSA-427359;R-HSA-5625886;R-HSA-2299718;R-HSA-427389;R-HSA-5250924;R-HSA-5334118	23	0	No	NA	No	0	NF	1	DNA binding [GO:0003677]	3	nucleus [GO:0005634];nucleosome [GO:0000786];extracellular exosome [GO:0070062]
P04350	P68104	Tubulin beta-4A chain (Tubulin 5 beta) (Tubulin beta-4 chain)	Elongation factor 1-alpha 1 (EF-1-alpha-1) (Elongation factor Tu) (EF-Tu) (Eukaryotic elongation factor 1 A-1) (eEF1A-1) (Leukocyte receptor cluster member 7)	0.44	1415	1467	1227	0	no	28	3	NF	0	0	No	NA	No	0	NF	2	GTPase activity [GO:0003924];GTP binding [GO:0005525]	3	nucleus [GO:0005634];cytosol [GO:0005829];extracellular exosome [GO:0070062]
P23527	P16104	Histone H2B type 1-O (Histone H2B.2) (Histone H2B.n) (H2B/n)	Histone H2AX (H2a/x) (Histone H2A.X)	0.44	1141	912	782	0	no	27	26	R-HSA-5617472;R-HSA-73777;R-HSA-606279;R-HSA-5693565;R-HSA-977225;R-HSA-427413;R-HSA-171306;R-HSA-5693571;R-HSA-5625886;R-HSA-5334118;R-HSA-5578749;R-HSA-2559586;R-HSA-912446;R-HSA-69473;R-HSA-201722;R-HSA-1221632;R-HSA-2559582;R-HSA-212300;R-HSA-5693607;R-HSA-2559580;R-HSA-73728;R-HSA-427359;R-HSA-2299718;R-HSA-427389;R-HSA-5250924	25	0	No	NA	No	1	nucleosome assembly [GO:0006334]	1	DNA binding [GO:0003677]	3	nucleus [GO:0005634];nucleosome [GO:0000786];nucleoplasm [GO:0005654]
Q93079	P16104	Histone H2B type 1-H (Histone H2B.j) (H2B/j)	Histone H2AX (H2a/x) (Histone H2A.X)	0.44	1144	912	783	0	no	27	26	R-HSA-5617472;R-HSA-73777;R-HSA-606279;R-HSA-5693565;R-HSA-977225;R-HSA-427413;R-HSA-171306;R-HSA-5693571;R-HSA-5625886;R-HSA-5334118;R-HSA-5578749;R-HSA-2559586;R-HSA-912446;R-HSA-69473;R-HSA-201722;R-HSA-1221632;R-HSA-2559582;R-HSA-212300;R-HSA-5693607;R-HSA-2559580;R-HSA-73728;R-HSA-427359;R-HSA-2299718;R-HSA-427389;R-HSA-5250924	25	0	No	NA	No	1	nucleosome assembly [GO:0006334]	1	DNA binding [GO:0003677]	4	nucleus [GO:0005634];nucleosome [GO:0000786];nucleoplasm [GO:0005654];extracellular exosome [GO:0070062]
P02533	Q01546	Keratin, type I cytoskeletal 14 (Cytokeratin-14) (CK-14) (Keratin-14) (K14)	Keratin, type II cytoskeletal 2 oral (Cytokeratin-2P) (CK-2P) (K2P) (Keratin-76) (K76) (Type-II keratin Kb9)	0.44	707	689	510	0	no	1	0	NF	0	0	No	NA	No	1	epidermis development [GO:0008544]	0	NF	4	intermediate filament [GO:0005882];nucleus [GO:0005634];keratin filament [GO:0045095];extracellular exosome [GO:0070062]
P68363	P06733	Tubulin alpha-1B chain (Alpha-tubulin ubiquitous) (Tubulin K-alpha-1) (Tubulin alpha-ubiquitous chain)	Alpha-enolase (EC 4.2.1.11) (2-phospho-D-glycerate hydro-lyase) (C-myc promoter-binding protein) (Enolase 1) (MBP-1) (MPB-1) (Non-neural enolase) (NNE) (Phosphopyruvate hydratase) (Plasminogen-binding protein)	0.44	1662	1341	1269	0	NA	21	2	NF	0	0	No	NA	No	0	NF	0	NF	2	extracellular exosome [GO:0070062];myelin sheath [GO:0043209]
Q93079	Q6FI13	Histone H2B type 1-H (Histone H2B.j) (H2B/j)	Histone H2A type 2-A (Histone H2A.2) (Histone H2A/o)	0.44	1144	923	794	0	no	27	24	R-HSA-5617472;R-HSA-73777;R-HSA-606279;R-HSA-3214847;R-HSA-977225;R-HSA-427413;R-HSA-171306;R-HSA-5625886;R-HSA-5334118;R-HSA-5578749;R-HSA-2559586;R-HSA-912446;R-HSA-3214815;R-HSA-201722;R-HSA-1221632;R-HSA-2559582;R-HSA-212300;R-HSA-2559580;R-HSA-73728;R-HSA-427359;R-HSA-2299718;R-HSA-427389;R-HSA-5250924	23	0	No	NA	No	0	NF	1	DNA binding [GO:0003677]	3	nucleus [GO:0005634];nucleosome [GO:0000786];extracellular exosome [GO:0070062]
O60814	P0C0S8	Histone H2B type 1-K (H2B K) (HIRA-interacting protein 1)	Histone H2A type 1 (H2A.1) (Histone H2A/p)	0.44	1143	927	797	0	no	27	3	R-HSA-3214847;R-HSA-3214815	2	0	No	NA	No	0	NF	1	DNA binding [GO:0003677]	1	nucleus [GO:0005634]
P33778	Q16777	Histone H2B type 1-B (Histone H2B.1) (Histone H2B.f) (H2B/f)	Histone H2A type 2-C (Histone H2A-GL101) (Histone H2A/q)	0.44	1138	922	789	0	no	27	24	R-HSA-5617472;R-HSA-73777;R-HSA-606279;R-HSA-3214847;R-HSA-977225;R-HSA-427413;R-HSA-171306;R-HSA-5625886;R-HSA-5334118;R-HSA-5578749;R-HSA-2559586;R-HSA-912446;R-HSA-3214815;R-HSA-201722;R-HSA-1221632;R-HSA-2559582;R-HSA-212300;R-HSA-2559580;R-HSA-73728;R-HSA-427359;R-HSA-2299718;R-HSA-427389;R-HSA-5250924	23	0	No	NA	No	0	NF	1	DNA binding [GO:0003677]	2	nucleus [GO:0005634];nucleosome [GO:0000786]
Q99878	P06899	Histone H2A type 1-J (Histone H2A/e)	Histone H2B type 1-J (Histone H2B.1) (Histone H2B.r) (H2B/r)	0.44	927	1142	798	0	no	24	27	R-HSA-5578749;R-HSA-5617472;R-HSA-912446;R-HSA-2559586;R-HSA-73777;R-HSA-3214815;R-HSA-201722;R-HSA-606279;R-HSA-1221632;R-HSA-2559582;R-HSA-3214847;R-HSA-212300;R-HSA-977225;R-HSA-427413;R-HSA-171306;R-HSA-2559580;R-HSA-73728;R-HSA-427359;R-HSA-5625886;R-HSA-2299718;R-HSA-427389;R-HSA-5250924;R-HSA-5334118	23	0	No	NA	No	0	NF	1	DNA binding [GO:0003677]	2	nucleus [GO:0005634];nucleosome [GO:0000786]
P06899	Q16777	Histone H2B type 1-J (Histone H2B.1) (Histone H2B.r) (H2B/r)	Histone H2A type 2-C (Histone H2A-GL101) (Histone H2A/q)	0.44	1142	922	794	0	no	27	24	R-HSA-5617472;R-HSA-73777;R-HSA-606279;R-HSA-3214847;R-HSA-977225;R-HSA-427413;R-HSA-171306;R-HSA-5625886;R-HSA-5334118;R-HSA-5578749;R-HSA-2559586;R-HSA-912446;R-HSA-3214815;R-HSA-201722;R-HSA-1221632;R-HSA-2559582;R-HSA-212300;R-HSA-2559580;R-HSA-73728;R-HSA-427359;R-HSA-2299718;R-HSA-427389;R-HSA-5250924	23	0	No	NA	No	0	NF	1	DNA binding [GO:0003677]	2	nucleus [GO:0005634];nucleosome [GO:0000786]
P62805	P57053	Histone H4	Histone H2B type F-S (Histone H2B.s) (H2B/s)	0.43	1115	1142	923	0	no	30	25	R-HSA-5617472;R-HSA-73777;R-HSA-5693565;R-HSA-606279;R-HSA-977225;R-HSA-427413;R-HSA-171306;R-HSA-5693571;R-HSA-5625886;R-HSA-5334118;R-HSA-5578749;R-HSA-912446;R-HSA-2559586;R-HSA-69473;R-HSA-201722;R-HSA-1221632;R-HSA-2559582;R-HSA-212300;R-HSA-5693607;R-HSA-2559580;R-HSA-73728;R-HSA-427359;R-HSA-2299718;R-HSA-427389;R-HSA-5250924	25	0	No	NA	No	1	nucleosome assembly [GO:0006334]	1	DNA binding [GO:0003677]	2	nucleus [GO:0005634];nucleoplasm [GO:0005654]
Q01082	Q00610	Spectrin beta chain, non-erythrocytic 1 (Beta-II spectrin) (Fodrin beta chain) (Spectrin, non-erythroid beta chain 1)	Clathrin heavy chain 1 (Clathrin heavy chain on chromosome 17) (CLH-17)	0.43	1259	1369	1125	0	no	5	8	NF	0	0	No	NA	No	0	NF	1	poly(A) RNA binding [GO:0044822]	2	cytosol [GO:0005829];extracellular exosome [GO:0070062]
P62805	P58876	Histone H4	Histone H2B type 1-D (HIRA-interacting protein 2) (Histone H2B.1 B) (Histone H2B.b) (H2B/b)	0.43	1115	1139	919	0	no	30	27	R-HSA-5617472;R-HSA-73777;R-HSA-5693565;R-HSA-606279;R-HSA-3214847;R-HSA-977225;R-HSA-427413;R-HSA-171306;R-HSA-5693571;R-HSA-5625886;R-HSA-5334118;R-HSA-5578749;R-HSA-912446;R-HSA-2559586;R-HSA-3214815;R-HSA-69473;R-HSA-201722;R-HSA-1221632;R-HSA-2559582;R-HSA-212300;R-HSA-5693607;R-HSA-2559580;R-HSA-73728;R-HSA-427359;R-HSA-2299718;R-HSA-427389;R-HSA-5250924	27	0	No	NA	No	1	nucleosome assembly [GO:0006334]	1	DNA binding [GO:0003677]	3	nucleus [GO:0005634];nucleoplasm [GO:0005654];extracellular exosome [GO:0070062]
Q13885	Q9BYX7	Tubulin beta-2A chain (Tubulin beta class IIa)	Putative beta-actin-like protein 3 (Kappa-actin) (POTE ankyrin domain family member K)	0.43	1484	1687	1398	0	no	22	1	NF	0	NA	NA	NA	No	0	NF	0	NF	1	extracellular exosome [GO:0070062]
P33778	Q93077	Histone H2B type 1-B (Histone H2B.1) (Histone H2B.f) (H2B/f)	Histone H2A type 1-C (Histone H2A/l)	0.43	1138	921	787	0	no	27	24	R-HSA-5617472;R-HSA-73777;R-HSA-606279;R-HSA-3214847;R-HSA-977225;R-HSA-427413;R-HSA-171306;R-HSA-5625886;R-HSA-5334118;R-HSA-5578749;R-HSA-2559586;R-HSA-912446;R-HSA-3214815;R-HSA-201722;R-HSA-1221632;R-HSA-2559582;R-HSA-212300;R-HSA-2559580;R-HSA-73728;R-HSA-427359;R-HSA-2299718;R-HSA-427389;R-HSA-5250924	23	0	No	NA	No	0	NF	1	DNA binding [GO:0003677]	2	nucleus [GO:0005634];nucleosome [GO:0000786]
P0CG38	P62979	POTE ankyrin domain family member I	Ubiquitin-40S ribosomal protein S27a (Ubiquitin carboxyl extension protein 80) [Cleaved into: Ubiquitin; 40S ribosomal protein S27a]	0.43	1639	1435	1333	0	NA	0	153	NF	0	0	No	NA	Yes	0	NF	0	NF	2	extracellular space [GO:0005615];extracellular exosome [GO:0070062]
P02533	P12035	Keratin, type I cytoskeletal 14 (Cytokeratin-14) (CK-14) (Keratin-14) (K14)	Keratin, type II cytoskeletal 3 (65 kDa cytokeratin) (Cytokeratin-3) (CK-3) (Keratin-3) (K3) (Type-II keratin Kb3)	0.43	707	650	491	0	yes	1	0	NF	0	0	No	NA	No	1	epithelial cell differentiation [GO:0030855]	0	NF	3	intermediate filament [GO:0005882];keratin filament [GO:0045095];extracellular exosome [GO:0070062]
P04908	P23527	Histone H2A type 1-B/E (Histone H2A.2) (Histone H2A/a) (Histone H2A/m)	Histone H2B type 1-O (Histone H2B.2) (Histone H2B.n) (H2B/n)	0.43	917	1141	786	0	no	24	27	R-HSA-5578749;R-HSA-5617472;R-HSA-912446;R-HSA-2559586;R-HSA-73777;R-HSA-3214815;R-HSA-201722;R-HSA-606279;R-HSA-1221632;R-HSA-2559582;R-HSA-3214847;R-HSA-212300;R-HSA-977225;R-HSA-427413;R-HSA-171306;R-HSA-2559580;R-HSA-73728;R-HSA-427359;R-HSA-5625886;R-HSA-2299718;R-HSA-427389;R-HSA-5250924;R-HSA-5334118	23	0	No	NA	No	0	NF	1	DNA binding [GO:0003677]	2	nucleus [GO:0005634];nucleosome [GO:0000786]
A0M8Q6	P01834	Ig lambda-7 chain C region	Ig kappa chain C region	0.43	455	588	342	0	no	14	14	R-HSA-2871796;R-HSA-2730905;R-HSA-166663;R-HSA-173623;R-HSA-2871837;R-HSA-2168880;R-HSA-2454202;R-HSA-2029485;R-HSA-5690714;R-HSA-2871809;R-HSA-198933;R-HSA-2029481;R-HSA-983695;R-HSA-2029482	14	NA	NA	NA	No	12	regulation of immune response [GO:0050776];phagocytosis, recognition [GO:0006910];complement activation, classical pathway [GO:0006958];innate immune response [GO:0045087];defense response to bacterium [GO:0042742];Fc-epsilon receptor signaling pathway [GO:0038095];phagocytosis, engulfment [GO:0006911];B cell receptor signaling pathway [GO:0050853];Fc-gamma receptor signaling pathway involved in …	3	immunoglobulin receptor binding [GO:0034987];antigen binding [GO:0003823];serine-type endopeptidase activity [GO:0004252]	5	plasma membrane [GO:0005886];immunoglobulin complex, circulating [GO:0042571];extracellular region [GO:0005576];external side of plasma membrane [GO:0009897];blood microparticle [GO:0072562]
P68366	Q05639	Tubulin alpha-4A chain (Alpha-tubulin 1) (Testis-specific alpha-tubulin) (Tubulin H2-alpha) (Tubulin alpha-1 chain)	Elongation factor 1-alpha 2 (EF-1-alpha-2) (Eukaryotic elongation factor 1 A-2) (eEF1A-2) (Statin-S1)	0.43	1599	1397	1308	0	no	29	1	NF	0	0	No	NA	No	0	NF	2	GTPase activity [GO:0003924];GTP binding [GO:0005525]	0	NF
P04745	P16233	Alpha-amylase 1 (EC 3.2.1.1) (1,4-alpha-D-glucan glucanohydrolase 1) (Salivary alpha-amylase)	Pancreatic triacylglycerol lipase (PL) (PTL) (Pancreatic lipase) (EC 3.1.1.3)	0.43	40	35	26	0	no	1	2	NF	0	0	No	NA	Yes	0	NF	1	metal ion binding [GO:0046872]	0	NF
Q05639	P0CG48	Elongation factor 1-alpha 2 (EF-1-alpha-2) (Eukaryotic elongation factor 1 A-2) (eEF1A-2) (Statin-S1)	Polyubiquitin-C [Cleaved into: Ubiquitin]	0.43	1397	1428	1166	0	NA	1	139	NF	0	0	No	NA	No	1	positive regulation of apoptotic process [GO:0043065]	0	NF	1	myelin sheath [GO:0043209]
Q05639	P0CG47	Elongation factor 1-alpha 2 (EF-1-alpha-2) (Eukaryotic elongation factor 1 A-2) (eEF1A-2) (Statin-S1)	Polyubiquitin-B [Cleaved into: Ubiquitin]	0.43	1397	1428	1166	0	NA	1	139	NF	0	0	No	NA	No	1	positive regulation of apoptotic process [GO:0043065]	0	NF	1	neuronal cell body [GO:0043025]
Q9Y490	P21333	Talin-1	Filamin-A (FLN-A) (Actin-binding protein 280) (ABP-280) (Alpha-filamin) (Endothelial actin-binding protein) (Filamin-1) (Non-muscle filamin)	0.43	1427	1665	1382	0	no	8	4	R-HSA-114608	1	0	No	NA	No	2	platelet aggregation [GO:0070527];platelet degranulation [GO:0002576]	1	cadherin binding involved in cell-cell adhesion [GO:0098641]	8	cell-cell adherens junction [GO:0005913];cytosol [GO:0005829];cytoplasm [GO:0005737];focal adhesion [GO:0005925];cell-cell junction [GO:0005911];plasma membrane [GO:0005886];extracellular region [GO:0005576];extracellular exosome [GO:0070062]
P33778	P04908	Histone H2B type 1-B (Histone H2B.1) (Histone H2B.f) (H2B/f)	Histone H2A type 1-B/E (Histone H2A.2) (Histone H2A/a) (Histone H2A/m)	0.43	1138	917	783	0	no	27	24	R-HSA-5617472;R-HSA-73777;R-HSA-606279;R-HSA-3214847;R-HSA-977225;R-HSA-427413;R-HSA-171306;R-HSA-5625886;R-HSA-5334118;R-HSA-5578749;R-HSA-2559586;R-HSA-912446;R-HSA-3214815;R-HSA-201722;R-HSA-1221632;R-HSA-2559582;R-HSA-212300;R-HSA-2559580;R-HSA-73728;R-HSA-427359;R-HSA-2299718;R-HSA-427389;R-HSA-5250924	23	0	No	NA	No	0	NF	1	DNA binding [GO:0003677]	2	nucleus [GO:0005634];nucleosome [GO:0000786]
P01602	P01594	Ig heavy chain V-I region 5 (Ig kappa chain V-I region HK102) (Immunoglobulin kappa variable 1-5) (Fragment)	Ig kappa chain V-I region AU	0.43	88	102	58	0	no	14	14	R-HSA-2871796;R-HSA-2730905;R-HSA-166663;R-HSA-173623;R-HSA-2871837;R-HSA-2168880;R-HSA-2454202;R-HSA-2029485;R-HSA-5690714;R-HSA-2871809;R-HSA-198933;R-HSA-2029481;R-HSA-983695;R-HSA-2029482	14	NA	NA	NA	No	7	regulation of immune response [GO:0050776];immune response [GO:0006955];complement activation, classical pathway [GO:0006958];Fc-epsilon receptor signaling pathway [GO:0038095];Fc-gamma receptor signaling pathway involved in phagocytosis [GO:0038096];receptor-mediated endocytosis [GO:0006898];complement activation [GO:0006956]	2	antigen binding [GO:0003823];serine-type endopeptidase activity [GO:0004252]	3	extracellular region [GO:0005576];plasma membrane [GO:0005886];blood microparticle [GO:0072562]
Q7L7L0	P57053	Histone H2A type 3	Histone H2B type F-S (Histone H2B.s) (H2B/s)	0.43	917	1142	786	0	no	3	25	NF	0	0	No	NA	No	0	NF	1	DNA binding [GO:0003677]	1	nuclear nucleosome [GO:0000788]
P62807	P20671	Histone H2B type 1-C/E/F/G/I (Histone H2B.1 A) (Histone H2B.a) (H2B/a) (Histone H2B.g) (H2B/g) (Histone H2B.h) (H2B/h) (Histone H2B.k) (H2B/k) (Histone H2B.l) (H2B/l)	Histone H2A type 1-D (Histone H2A.3) (Histone H2A/g)	0.43	1144	924	794	0	no	27	24	R-HSA-5617472;R-HSA-73777;R-HSA-606279;R-HSA-3214847;R-HSA-977225;R-HSA-427413;R-HSA-171306;R-HSA-5625886;R-HSA-5334118;R-HSA-5578749;R-HSA-2559586;R-HSA-912446;R-HSA-3214815;R-HSA-201722;R-HSA-1221632;R-HSA-2559582;R-HSA-212300;R-HSA-2559580;R-HSA-73728;R-HSA-427359;R-HSA-2299718;R-HSA-427389;R-HSA-5250924	23	0	No	NA	No	0	NF	1	DNA binding [GO:0003677]	3	nucleus [GO:0005634];nucleosome [GO:0000786];extracellular exosome [GO:0070062]
P07237	P10809	Protein disulfide-isomerase (PDI) (EC 5.3.4.1) (Cellular thyroid hormone-binding protein) (Prolyl 4-hydroxylase subunit beta) (p55)	60 kDa heat shock protein, mitochondrial (60 kDa chaperonin) (Chaperonin 60) (CPN60) (Heat shock protein 60) (HSP-60) (Hsp60) (HuCHA60) (Mitochondrial matrix protein P1) (P60 lymphocyte protein)	0.43	1000	1122	841	0	yes	4	1	NF	0	0	No	NF	No	0	NF	1	poly(A) RNA binding [GO:0044822]	2	extracellular matrix [GO:0031012];extracellular exosome [GO:0070062]
P05106	P08514	Integrin beta-3 (Platelet membrane glycoprotein IIIa) (GPIIIa) (CD antigen CD61)	Integrin alpha-IIb (GPalpha IIb) (GPIIb) (Platelet membrane glycoprotein IIb) (CD antigen CD41) [Cleaved into: Integrin alpha-IIb heavy chain; Integrin alpha-IIb light chain, form 1; Integrin alpha-IIb light chain, form 2]	0.43	159	169	79	1	yes	13	8	R-HSA-445144;R-HSA-5674135;R-HSA-372708;R-HSA-354192;R-HSA-114608;R-HSA-354194;R-HSA-3000178;R-HSA-216083	8	0	No	2872_ITGA2b-ITGB3-CD9-GP1b-CD47 complex;2381_ITGA2B-ITGB3 complex;2896_ITGA2b-ITGB3-CD47-FAK complex;2376_ITGA2B-ITGB3-FN1-TGM2 complex;3115_ITGA2B-ITGB3-ICAM4 complex;2370_ITGA2b-ITGB3-CD9 complex;2382_ITGA2B-ITGB3-F11R complex;2378_ITGA2b-ITGB3-TLN1 complex;2379_ITGA2B-ITGB3-CIB1 complex;2377_ITGA2b-ITGB3-CD47-SRC complex	No	6	extracellular matrix organization [GO:0030198];platelet aggregation [GO:0070527];platelet degranulation [GO:0002576];integrin-mediated signaling pathway [GO:0007229];cell adhesion [GO:0007155];cell-matrix adhesion [GO:0007160]	2	extracellular matrix binding [GO:0050840];identical protein binding [GO:0042802]	7	extracellular exosome [GO:0070062];cell surface [GO:0009986];focal adhesion [GO:0005925];integral component of plasma membrane [GO:0005887];integrin complex [GO:0008305];platelet alpha granule membrane [GO:0031092];plasma membrane [GO:0005886]
P17174	P00505	Aspartate aminotransferase, cytoplasmic (cAspAT) (EC 2.6.1.1) (EC 2.6.1.3) (Cysteine aminotransferase, cytoplasmic) (Cysteine transaminase, cytoplasmic) (cCAT) (Glutamate oxaloacetate transaminase 1) (Transaminase A)	Aspartate aminotransferase, mitochondrial (mAspAT) (EC 2.6.1.1) (EC 2.6.1.7) (Fatty acid-binding protein) (FABP-1) (Glutamate oxaloacetate transaminase 2) (Kynurenine aminotransferase 4) (Kynurenine aminotransferase IV) (Kynurenine--oxoglutarate transaminase 4) (Kynurenine--oxoglutarate transaminase IV) (Plasma membrane-associated fatty acid-binding protein) (FABPpm) (Transaminase A)	0.43	626	708	449	0	no	4	2	R-HSA-70263;R-HSA-70614	2	0	yes	NA	No	10	aspartate biosynthetic process [GO:0006532];cellular amino acid biosynthetic process [GO:0008652];oxaloacetate metabolic process [GO:0006107];aspartate metabolic process [GO:0006531];glutamate catabolic process to 2-oxoglutarate [GO:0019551];2-oxoglutarate metabolic process [GO:0006103];glutamate catabolic process to aspartate [GO:0019550];gluconeogenesis [GO:0006094];aspartate catabolic process …	4	L-phenylalanine:2-oxoglutarate aminotransferase activity [GO:0080130];pyridoxal phosphate binding [GO:0030170];identical protein binding [GO:0042802];L-aspartate:2-oxoglutarate aminotransferase activity [GO:0004069]	1	extracellular exosome [GO:0070062]
P49368	P17987	T-complex protein 1 subunit gamma (TCP-1-gamma) (CCT-gamma) (hTRiC5)	T-complex protein 1 subunit alpha (TCP-1-alpha) (CCT-alpha)	0.43	672	802	487	1	yes	6	6	R-HSA-389957;R-HSA-6814122;R-HSA-390471;R-HSA-5620922;R-HSA-389960;R-HSA-390450	6	0	No	NA	No	7	positive regulation of protein localization to Cajal body [GO:1904871];toxin transport [GO:1901998];protein folding [GO:0006457];positive regulation of telomere maintenance via telomerase [GO:0032212];binding of sperm to zona pellucida [GO:0007339];positive regulation of telomerase RNA localization to Cajal body [GO:1904874];protein stabilization [GO:0050821]	3	ATP binding [GO:0005524];unfolded protein binding [GO:0051082];poly(A) RNA binding [GO:0044822]	7	cytosol [GO:0005829];zona pellucida receptor complex [GO:0002199];microtubule [GO:0005874];chaperonin-containing T-complex [GO:0005832];cell body [GO:0044297];myelin sheath [GO:0043209];extracellular exosome [GO:0070062]
Q7L7L0	Q8N257	Histone H2A type 3	Histone H2B type 3-B (H2B type 12)	0.43	917	1134	782	0	no	3	27	R-HSA-3214815;R-HSA-3214847	2	0	No	NA	No	0	NF	1	DNA binding [GO:0003677]	1	nuclear nucleosome [GO:0000788]
Q93077	Q16778	Histone H2A type 1-C (Histone H2A/l)	Histone H2B type 2-E (Histone H2B-GL105) (Histone H2B.q) (H2B/q)	0.43	921	1143	792	0	no	24	27	R-HSA-5578749;R-HSA-5617472;R-HSA-912446;R-HSA-2559586;R-HSA-73777;R-HSA-3214815;R-HSA-201722;R-HSA-606279;R-HSA-1221632;R-HSA-2559582;R-HSA-3214847;R-HSA-212300;R-HSA-977225;R-HSA-427413;R-HSA-171306;R-HSA-2559580;R-HSA-73728;R-HSA-427359;R-HSA-5625886;R-HSA-2299718;R-HSA-427389;R-HSA-5250924;R-HSA-5334118	23	0	No	NA	No	0	NF	1	DNA binding [GO:0003677]	3	nucleus [GO:0005634];nucleosome [GO:0000786];extracellular exosome [GO:0070062]
P62987	Q05639	Ubiquitin-60S ribosomal protein L40 (CEP52) (Ubiquitin A-52 residue ribosomal protein fusion product 1) [Cleaved into: Ubiquitin; 60S ribosomal protein L40]	Elongation factor 1-alpha 2 (EF-1-alpha-2) (Eukaryotic elongation factor 1 A-2) (eEF1A-2) (Statin-S1)	0.43	1429	1397	1167	0	NA	150	1	NF	0	0	No	NA	No	1	positive regulation of apoptotic process [GO:0043065]	0	NF	0	NF
P0CG38	Q9BYX7	POTE ankyrin domain family member I	Putative beta-actin-like protein 3 (Kappa-actin) (POTE ankyrin domain family member K)	0.43	958	1311	788	0	no	0	1	NF	0	NA	NA	NA	No	0	NF	0	NF	1	extracellular exosome [GO:0070062]
P62805	O60814	Histone H4	Histone H2B type 1-K (H2B K) (HIRA-interacting protein 1)	0.43	1115	1143	924	0	no	30	27	R-HSA-5617472;R-HSA-73777;R-HSA-5693565;R-HSA-606279;R-HSA-3214847;R-HSA-977225;R-HSA-427413;R-HSA-171306;R-HSA-5693571;R-HSA-5625886;R-HSA-5334118;R-HSA-5578749;R-HSA-912446;R-HSA-2559586;R-HSA-3214815;R-HSA-69473;R-HSA-201722;R-HSA-1221632;R-HSA-2559582;R-HSA-212300;R-HSA-5693607;R-HSA-2559580;R-HSA-73728;R-HSA-427359;R-HSA-2299718;R-HSA-427389;R-HSA-5250924	27	0	No	NA	No	1	nucleosome assembly [GO:0006334]	1	DNA binding [GO:0003677]	2	nucleus [GO:0005634];nucleoplasm [GO:0005654]
P02768	P60709	Serum albumin	Actin, cytoplasmic 1 (Beta-actin) [Cleaved into: Actin, cytoplasmic 1, N-terminally processed]	0.43	1587	1790	1554	0	NA	7	21	NF	0	0	No	NA	Yes	1	retina homeostasis [GO:0001895]	1	identical protein binding [GO:0042802]	4	protein complex [GO:0043234];extracellular space [GO:0005615];extracellular exosome [GO:0070062];blood microparticle [GO:0072562]
Q6FI13	P58876	Histone H2A type 2-A (Histone H2A.2) (Histone H2A/o)	Histone H2B type 1-D (HIRA-interacting protein 2) (Histone H2B.1 B) (Histone H2B.b) (H2B/b)	0.43	923	1139	790	0	no	24	27	R-HSA-5578749;R-HSA-5617472;R-HSA-912446;R-HSA-2559586;R-HSA-73777;R-HSA-3214815;R-HSA-201722;R-HSA-606279;R-HSA-1221632;R-HSA-2559582;R-HSA-3214847;R-HSA-212300;R-HSA-977225;R-HSA-427413;R-HSA-171306;R-HSA-2559580;R-HSA-73728;R-HSA-427359;R-HSA-5625886;R-HSA-2299718;R-HSA-427389;R-HSA-5250924;R-HSA-5334118	23	0	No	NA	No	0	NF	1	DNA binding [GO:0003677]	2	nucleus [GO:0005634];extracellular exosome [GO:0070062]
P20671	Q16778	Histone H2A type 1-D (Histone H2A.3) (Histone H2A/g)	Histone H2B type 2-E (Histone H2B-GL105) (Histone H2B.q) (H2B/q)	0.43	924	1143	795	0	no	24	27	R-HSA-5578749;R-HSA-5617472;R-HSA-912446;R-HSA-2559586;R-HSA-73777;R-HSA-3214815;R-HSA-201722;R-HSA-606279;R-HSA-1221632;R-HSA-2559582;R-HSA-3214847;R-HSA-212300;R-HSA-977225;R-HSA-427413;R-HSA-171306;R-HSA-2559580;R-HSA-73728;R-HSA-427359;R-HSA-5625886;R-HSA-2299718;R-HSA-427389;R-HSA-5250924;R-HSA-5334118	23	0	No	NA	No	0	NF	1	DNA binding [GO:0003677]	3	nucleus [GO:0005634];nucleosome [GO:0000786];extracellular exosome [GO:0070062]
P26439	P15538	3 beta-hydroxysteroid dehydrogenase/Delta 5-->4-isomerase type 2 (3 beta-hydroxysteroid dehydrogenase/Delta 5-->4-isomerase type II) (3-beta-HSD II) (3-beta-HSD adrenal and gonadal type) [Includes: 3-beta-hydroxy-Delta(5)-steroid dehydrogenase (EC 1.1.1.145) (3-beta-hydroxy-5-ene steroid dehydrogenase) (Progesterone reductase); Steroid Delta-isomerase (EC 5.3.3.1) (Delta-5-3-ketosteroid isomerase…	Cytochrome P450 11B1, mitochondrial (CYPXIB1) (Cytochrome P-450c11) (Cytochrome P450C11) (Steroid 11-beta-hydroxylase) (EC 1.14.15.4)	0.43	95	42	41	0	no	3	3	R-HSA-194002	1	0	No	NA	No	1	glucocorticoid biosynthetic process [GO:0006704]	0	NF	1	mitochondrial inner membrane [GO:0005743]
Q93079	Q93077	Histone H2B type 1-H (Histone H2B.j) (H2B/j)	Histone H2A type 1-C (Histone H2A/l)	0.43	1144	921	791	0	no	27	24	R-HSA-5617472;R-HSA-73777;R-HSA-606279;R-HSA-3214847;R-HSA-977225;R-HSA-427413;R-HSA-171306;R-HSA-5625886;R-HSA-5334118;R-HSA-5578749;R-HSA-2559586;R-HSA-912446;R-HSA-3214815;R-HSA-201722;R-HSA-1221632;R-HSA-2559582;R-HSA-212300;R-HSA-2559580;R-HSA-73728;R-HSA-427359;R-HSA-2299718;R-HSA-427389;R-HSA-5250924	23	0	No	NA	No	0	NF	1	DNA binding [GO:0003677]	3	nucleus [GO:0005634];nucleosome [GO:0000786];extracellular exosome [GO:0070062]
Q93088	P32754	Betaine--homocysteine S-methyltransferase 1 (EC 2.1.1.5)	4-hydroxyphenylpyruvate dioxygenase (EC 1.13.11.27) (4-hydroxyphenylpyruvic acid oxidase) (4HPPD) (HPD) (HPPDase)	0.43	167	110	88	0	no	2	1	NF	0	0	No	NA	No	0	NF	0	NF	2	cytosol [GO:0005829];extracellular exosome [GO:0070062]
P62805	Q99877	Histone H4	Histone H2B type 1-N (Histone H2B.d) (H2B/d)	0.43	1115	1140	920	0	no	30	27	R-HSA-5617472;R-HSA-73777;R-HSA-5693565;R-HSA-606279;R-HSA-3214847;R-HSA-977225;R-HSA-427413;R-HSA-171306;R-HSA-5693571;R-HSA-5625886;R-HSA-5334118;R-HSA-5578749;R-HSA-912446;R-HSA-2559586;R-HSA-3214815;R-HSA-69473;R-HSA-201722;R-HSA-1221632;R-HSA-2559582;R-HSA-212300;R-HSA-5693607;R-HSA-2559580;R-HSA-73728;R-HSA-427359;R-HSA-2299718;R-HSA-427389;R-HSA-5250924	27	0	No	NA	No	1	nucleosome assembly [GO:0006334]	1	DNA binding [GO:0003677]	4	nucleus [GO:0005634];nucleosome [GO:0000786];nucleoplasm [GO:0005654];extracellular exosome [GO:0070062]
P62805	Q99879	Histone H4	Histone H2B type 1-M (Histone H2B.e) (H2B/e)	0.43	1115	1139	919	0	no	30	27	R-HSA-5617472;R-HSA-73777;R-HSA-5693565;R-HSA-606279;R-HSA-3214847;R-HSA-977225;R-HSA-427413;R-HSA-171306;R-HSA-5693571;R-HSA-5625886;R-HSA-5334118;R-HSA-5578749;R-HSA-912446;R-HSA-2559586;R-HSA-3214815;R-HSA-69473;R-HSA-201722;R-HSA-1221632;R-HSA-2559582;R-HSA-212300;R-HSA-5693607;R-HSA-2559580;R-HSA-73728;R-HSA-427359;R-HSA-2299718;R-HSA-427389;R-HSA-5250924	27	0	No	1227_H2AX complex II	No	1	nucleosome assembly [GO:0006334]	1	DNA binding [GO:0003677]	4	nucleus [GO:0005634];nucleosome [GO:0000786];nucleoplasm [GO:0005654];extracellular exosome [GO:0070062]
P00352	P05091	Retinal dehydrogenase 1 (RALDH 1) (RalDH1) (EC 1.2.1.36) (ALDH-E1) (ALHDII) (Aldehyde dehydrogenase family 1 member A1) (Aldehyde dehydrogenase, cytosolic)	Aldehyde dehydrogenase, mitochondrial (EC 1.2.1.3) (ALDH class 2) (ALDH-E2) (ALDHI)	0.43	578	788	470	1	yes	3	2	R-HSA-71384	1	0	yes	NA	No	1	ethanol oxidation [GO:0006069]	1	aldehyde dehydrogenase (NAD) activity [GO:0004029]	1	extracellular exosome [GO:0070062]
P20671	Q99880	Histone H2A type 1-D (Histone H2A.3) (Histone H2A/g)	Histone H2B type 1-L (Histone H2B.c) (H2B/c)	0.43	924	1138	789	0	no	24	27	R-HSA-5578749;R-HSA-5617472;R-HSA-912446;R-HSA-2559586;R-HSA-73777;R-HSA-3214815;R-HSA-201722;R-HSA-606279;R-HSA-1221632;R-HSA-2559582;R-HSA-3214847;R-HSA-212300;R-HSA-977225;R-HSA-427413;R-HSA-171306;R-HSA-2559580;R-HSA-73728;R-HSA-427359;R-HSA-5625886;R-HSA-2299718;R-HSA-427389;R-HSA-5250924;R-HSA-5334118	23	0	No	NA	No	0	NF	1	DNA binding [GO:0003677]	3	nucleus [GO:0005634];nucleosome [GO:0000786];extracellular exosome [GO:0070062]
P58876	Q9BTM1	Histone H2B type 1-D (HIRA-interacting protein 2) (Histone H2B.1 B) (Histone H2B.b) (H2B/b)	Histone H2A.J (H2a/j)	0.43	1139	926	792	0	no	27	0	NF	0	0	No	NA	No	0	NF	1	DNA binding [GO:0003677]	1	extracellular exosome [GO:0070062]
P01597	P01596	Ig kappa chain V-I region DEE	Ig kappa chain V-I region CAR	0.43	80	44	39	0	no	14	14	R-HSA-2871796;R-HSA-2730905;R-HSA-166663;R-HSA-173623;R-HSA-2871837;R-HSA-2168880;R-HSA-2454202;R-HSA-2029485;R-HSA-5690714;R-HSA-2871809;R-HSA-198933;R-HSA-2029481;R-HSA-983695;R-HSA-2029482	14	NA	NA	NA	No	0	NA	0	NA	0	NA
Q99877	P16104	Histone H2B type 1-N (Histone H2B.d) (H2B/d)	Histone H2AX (H2a/x) (Histone H2A.X)	0.43	1140	912	779	0	no	27	26	R-HSA-5617472;R-HSA-73777;R-HSA-606279;R-HSA-5693565;R-HSA-977225;R-HSA-427413;R-HSA-171306;R-HSA-5693571;R-HSA-5625886;R-HSA-5334118;R-HSA-5578749;R-HSA-2559586;R-HSA-912446;R-HSA-69473;R-HSA-201722;R-HSA-1221632;R-HSA-2559582;R-HSA-212300;R-HSA-5693607;R-HSA-2559580;R-HSA-73728;R-HSA-427359;R-HSA-2299718;R-HSA-427389;R-HSA-5250924	25	0	No	NA	No	1	nucleosome assembly [GO:0006334]	1	DNA binding [GO:0003677]	4	nucleus [GO:0005634];nucleosome [GO:0000786];nucleoplasm [GO:0005654];extracellular exosome [GO:0070062]
Q13885	A5A3E0	Tubulin beta-2A chain (Tubulin beta class IIa)	POTE ankyrin domain family member F (ANKRD26-like family C member 1B) (Chimeric POTE-actin protein)	0.43	1484	1691	1406	0	no	22	0	NF	0	0	No	NA	No	0	NF	0	NF	1	extracellular exosome [GO:0070062]
P20671	Q5QNW6	Histone H2A type 1-D (Histone H2A.3) (Histone H2A/g)	Histone H2B type 2-F	0.43	924	1144	794	0	no	24	2	R-HSA-3214815;R-HSA-3214847	2	0	No	NA	No	0	NF	1	DNA binding [GO:0003677]	2	nucleus [GO:0005634];extracellular exosome [GO:0070062]
P20671	Q8N257	Histone H2A type 1-D (Histone H2A.3) (Histone H2A/g)	Histone H2B type 3-B (H2B type 12)	0.43	924	1134	789	0	no	24	27	R-HSA-5578749;R-HSA-5617472;R-HSA-912446;R-HSA-2559586;R-HSA-73777;R-HSA-3214815;R-HSA-201722;R-HSA-606279;R-HSA-1221632;R-HSA-2559582;R-HSA-3214847;R-HSA-212300;R-HSA-977225;R-HSA-427413;R-HSA-171306;R-HSA-2559580;R-HSA-73728;R-HSA-427359;R-HSA-5625886;R-HSA-2299718;R-HSA-427389;R-HSA-5250924;R-HSA-5334118	23	0	No	NA	No	0	NF	1	DNA binding [GO:0003677]	1	nucleus [GO:0005634]
P58876	Q93077	Histone H2B type 1-D (HIRA-interacting protein 2) (Histone H2B.1 B) (Histone H2B.b) (H2B/b)	Histone H2A type 1-C (Histone H2A/l)	0.43	1139	921	787	0	no	27	24	R-HSA-5617472;R-HSA-73777;R-HSA-606279;R-HSA-3214847;R-HSA-977225;R-HSA-427413;R-HSA-171306;R-HSA-5625886;R-HSA-5334118;R-HSA-5578749;R-HSA-2559586;R-HSA-912446;R-HSA-3214815;R-HSA-201722;R-HSA-1221632;R-HSA-2559582;R-HSA-212300;R-HSA-2559580;R-HSA-73728;R-HSA-427359;R-HSA-2299718;R-HSA-427389;R-HSA-5250924	23	0	No	NA	No	0	NF	1	DNA binding [GO:0003677]	2	nucleus [GO:0005634];extracellular exosome [GO:0070062]
Q99879	Q6FI13	Histone H2B type 1-M (Histone H2B.e) (H2B/e)	Histone H2A type 2-A (Histone H2A.2) (Histone H2A/o)	0.43	1139	923	790	0	no	27	24	R-HSA-5617472;R-HSA-73777;R-HSA-606279;R-HSA-3214847;R-HSA-977225;R-HSA-427413;R-HSA-171306;R-HSA-5625886;R-HSA-5334118;R-HSA-5578749;R-HSA-2559586;R-HSA-912446;R-HSA-3214815;R-HSA-201722;R-HSA-1221632;R-HSA-2559582;R-HSA-212300;R-HSA-2559580;R-HSA-73728;R-HSA-427359;R-HSA-2299718;R-HSA-427389;R-HSA-5250924	23	0	No	NA	No	0	NF	1	DNA binding [GO:0003677]	3	nucleus [GO:0005634];nucleosome [GO:0000786];extracellular exosome [GO:0070062]
P13647	P04259	Keratin, type II cytoskeletal 5 (58 kDa cytokeratin) (Cytokeratin-5) (CK-5) (Keratin-5) (K5) (Type-II keratin Kb5)	Keratin, type II cytoskeletal 6B (Cytokeratin-6B) (CK-6B) (Keratin-6B) (K6B) (Type-II keratin Kb10)	0.43	445	710	381	0	no	1	0	NF	0	0	yes	NA	No	0	NF	1	structural constituent of cytoskeleton [GO:0005200]	2	keratin filament [GO:0045095];extracellular exosome [GO:0070062]
Q7Z3Y7	Q01546	Keratin, type I cytoskeletal 28 (Cytokeratin-28) (CK-28) (Keratin-25D) (K25D) (Keratin-28) (K28) (Type I inner root sheath-specific keratin-K25irs4)	Keratin, type II cytoskeletal 2 oral (Cytokeratin-2P) (CK-2P) (K2P) (Keratin-76) (K76) (Type-II keratin Kb9)	0.43	477	689	404	0	no	0	0	NF	0	0	No	NA	No	0	NF	1	structural molecule activity [GO:0005198]	2	intermediate filament [GO:0005882];extracellular exosome [GO:0070062]
Q99877	Q93077	Histone H2B type 1-N (Histone H2B.d) (H2B/d)	Histone H2A type 1-C (Histone H2A/l)	0.43	1140	921	787	0	no	27	24	R-HSA-5617472;R-HSA-73777;R-HSA-606279;R-HSA-3214847;R-HSA-977225;R-HSA-427413;R-HSA-171306;R-HSA-5625886;R-HSA-5334118;R-HSA-5578749;R-HSA-2559586;R-HSA-912446;R-HSA-3214815;R-HSA-201722;R-HSA-1221632;R-HSA-2559582;R-HSA-212300;R-HSA-2559580;R-HSA-73728;R-HSA-427359;R-HSA-2299718;R-HSA-427389;R-HSA-5250924	23	0	No	NA	No	0	NF	1	DNA binding [GO:0003677]	3	nucleus [GO:0005634];nucleosome [GO:0000786];extracellular exosome [GO:0070062]
Q92608	Q8NF50	Dedicator of cytokinesis protein 2	Dedicator of cytokinesis protein 8	0.43	239	228	151	0	NA	2	1	R-HSA-983231	1	0	No	NA	No	2	immunological synapse formation [GO:0001771];small GTPase mediated signal transduction [GO:0007264]	0	NF	2	cytosol [GO:0005829];membrane [GO:0016020]
P04908	Q16778	Histone H2A type 1-B/E (Histone H2A.2) (Histone H2A/a) (Histone H2A/m)	Histone H2B type 2-E (Histone H2B-GL105) (Histone H2B.q) (H2B/q)	0.43	917	1143	788	0	no	24	27	R-HSA-5578749;R-HSA-5617472;R-HSA-912446;R-HSA-2559586;R-HSA-73777;R-HSA-3214815;R-HSA-201722;R-HSA-606279;R-HSA-1221632;R-HSA-2559582;R-HSA-3214847;R-HSA-212300;R-HSA-977225;R-HSA-427413;R-HSA-171306;R-HSA-2559580;R-HSA-73728;R-HSA-427359;R-HSA-5625886;R-HSA-2299718;R-HSA-427389;R-HSA-5250924;R-HSA-5334118	23	0	No	NA	No	0	NF	1	DNA binding [GO:0003677]	3	nucleus [GO:0005634];nucleosome [GO:0000786];extracellular exosome [GO:0070062]
P12110	P11047	Collagen alpha-2(VI) chain	Laminin subunit gamma-1 (Laminin B2 chain) (Laminin-1 subunit gamma) (Laminin-10 subunit gamma) (Laminin-11 subunit gamma) (Laminin-2 subunit gamma) (Laminin-3 subunit gamma) (Laminin-4 subunit gamma) (Laminin-6 subunit gamma) (Laminin-7 subunit gamma) (Laminin-8 subunit gamma) (Laminin-9 subunit gamma) (S-laminin subunit gamma) (S-LAM gamma)	0.43	818	767	574	0	NA	7	5	R-HSA-3000178	1	0	No	NA	No	2	extracellular matrix organization [GO:0030198];cell adhesion [GO:0007155]	0	NF	4	extracellular region [GO:0005576];extracellular matrix [GO:0031012];extracellular space [GO:0005615];extracellular exosome [GO:0070062]
P0CG38	Q13885	POTE ankyrin domain family member I	Tubulin beta-2A chain (Tubulin beta class IIa)	0.43	1639	1484	1360	0	no	0	22	NF	0	0	No	NA	No	0	NF	0	NF	1	extracellular exosome [GO:0070062]
Q99877	Q9BTM1	Histone H2B type 1-N (Histone H2B.d) (H2B/d)	Histone H2A.J (H2a/j)	0.43	1140	926	792	0	no	27	0	NF	0	0	No	NA	No	0	NF	1	DNA binding [GO:0003677]	2	nucleosome [GO:0000786];extracellular exosome [GO:0070062]
P0C0S8	Q99880	Histone H2A type 1 (H2A.1) (Histone H2A/p)	Histone H2B type 1-L (Histone H2B.c) (H2B/c)	0.43	927	1138	792	0	no	3	27	R-HSA-3214815;R-HSA-3214847	2	0	No	NA	No	0	NF	1	DNA binding [GO:0003677]	3	nucleus [GO:0005634];nucleosome [GO:0000786];extracellular exosome [GO:0070062]
Q99878	Q99879	Histone H2A type 1-J (Histone H2A/e)	Histone H2B type 1-M (Histone H2B.e) (H2B/e)	0.43	927	1139	793	0	no	24	27	R-HSA-5578749;R-HSA-5617472;R-HSA-912446;R-HSA-2559586;R-HSA-73777;R-HSA-3214815;R-HSA-201722;R-HSA-606279;R-HSA-1221632;R-HSA-2559582;R-HSA-3214847;R-HSA-212300;R-HSA-977225;R-HSA-427413;R-HSA-171306;R-HSA-2559580;R-HSA-73728;R-HSA-427359;R-HSA-5625886;R-HSA-2299718;R-HSA-427389;R-HSA-5250924;R-HSA-5334118	23	0	No	NA	No	0	NF	1	DNA binding [GO:0003677]	3	nucleus [GO:0005634];nucleosome [GO:0000786];extracellular exosome [GO:0070062]
Q7L7L0	P06899	Histone H2A type 3	Histone H2B type 1-J (Histone H2B.1) (Histone H2B.r) (H2B/r)	0.43	917	1142	788	0	no	3	27	R-HSA-3214815;R-HSA-3214847	2	0	No	NA	No	0	NF	1	DNA binding [GO:0003677]	1	nuclear nucleosome [GO:0000788]
P68366	Q9BUF5	Tubulin alpha-4A chain (Alpha-tubulin 1) (Testis-specific alpha-tubulin) (Tubulin H2-alpha) (Tubulin alpha-1 chain)	Tubulin beta-6 chain (Tubulin beta class V)	0.43	1599	1253	1201	0	yes	29	22	R-HSA-68877;R-HSA-5610787;R-HSA-2467813;R-HSA-6807878;R-HSA-1445148;R-HSA-437239;R-HSA-380320;R-HSA-389960;R-HSA-5620924;R-HSA-6811436;R-HSA-389957;R-HSA-6811434;R-HSA-389977;R-HSA-5663220;R-HSA-2132295;R-HSA-8852276;R-HSA-190861;R-HSA-983189;R-HSA-190840;R-HSA-5617833;R-HSA-2500257;R-HSA-5626467	22	0	No	NA	No	1	microtubule-based process [GO:0007017]	3	GTPase activity [GO:0003924];structural constituent of cytoskeleton [GO:0005200];GTP binding [GO:0005525]	2	extracellular exosome [GO:0070062];microtubule [GO:0005874]
P02768	P63261	Serum albumin	Actin, cytoplasmic 2 (Gamma-actin) [Cleaved into: Actin, cytoplasmic 2, N-terminally processed]	0.43	1587	1790	1554	0	NA	7	15	NF	0	0	No	NA	Yes	1	retina homeostasis [GO:0001895]	1	identical protein binding [GO:0042802]	5	nucleus [GO:0005634];extracellular space [GO:0005615];extracellular exosome [GO:0070062];blood microparticle [GO:0072562];myelin sheath [GO:0043209]
Q7L7L0	Q16778	Histone H2A type 3	Histone H2B type 2-E (Histone H2B-GL105) (Histone H2B.q) (H2B/q)	0.43	917	1143	788	0	no	3	27	R-HSA-3214815;R-HSA-3214847	2	0	No	NA	No	0	NF	1	DNA binding [GO:0003677]	2	nuclear nucleosome [GO:0000788];extracellular exosome [GO:0070062]
P0CG48	Q7Z794	Polyubiquitin-C [Cleaved into: Ubiquitin]	Keratin, type II cytoskeletal 1b (Cytokeratin-1B) (CK-1B) (Keratin-77) (K77) (Type-II keratin Kb39)	0.43	1428	1011	934	0	NA	139	0	NF	0	0	No	NA	No	0	NF	0	NF	1	extracellular exosome [GO:0070062]
P04908	Q8N257	Histone H2A type 1-B/E (Histone H2A.2) (Histone H2A/a) (Histone H2A/m)	Histone H2B type 3-B (H2B type 12)	0.43	917	1134	782	0	no	24	27	R-HSA-5578749;R-HSA-5617472;R-HSA-912446;R-HSA-2559586;R-HSA-73777;R-HSA-3214815;R-HSA-201722;R-HSA-606279;R-HSA-1221632;R-HSA-2559582;R-HSA-3214847;R-HSA-212300;R-HSA-977225;R-HSA-427413;R-HSA-171306;R-HSA-2559580;R-HSA-73728;R-HSA-427359;R-HSA-5625886;R-HSA-2299718;R-HSA-427389;R-HSA-5250924;R-HSA-5334118	23	0	No	NA	No	0	NF	1	DNA binding [GO:0003677]	1	nucleus [GO:0005634]
Q93077	Q5QNW6	Histone H2A type 1-C (Histone H2A/l)	Histone H2B type 2-F	0.43	921	1144	791	0	no	24	2	R-HSA-3214815;R-HSA-3214847	2	0	No	NA	No	0	NF	1	DNA binding [GO:0003677]	2	nucleus [GO:0005634];extracellular exosome [GO:0070062]
P04908	P57053	Histone H2A type 1-B/E (Histone H2A.2) (Histone H2A/a) (Histone H2A/m)	Histone H2B type F-S (Histone H2B.s) (H2B/s)	0.43	917	1142	786	0	no	24	25	R-HSA-5578749;R-HSA-5617472;R-HSA-912446;R-HSA-2559586;R-HSA-73777;R-HSA-201722;R-HSA-606279;R-HSA-1221632;R-HSA-2559582;R-HSA-212300;R-HSA-977225;R-HSA-427413;R-HSA-171306;R-HSA-2559580;R-HSA-73728;R-HSA-427359;R-HSA-5625886;R-HSA-2299718;R-HSA-427389;R-HSA-5250924;R-HSA-5334118	21	0	No	NA	No	0	NF	1	DNA binding [GO:0003677]	1	nucleus [GO:0005634]
P08238	O43707	Heat shock protein HSP 90-beta (HSP 90) (Heat shock 84 kDa) (HSP 84) (HSP84)	Alpha-actinin-4 (Non-muscle alpha-actinin 4)	0.43	1514	1517	1313	0	no	8	2	NF	0	0	No	725_P2X7 receptor signalling complex	No	0	NF	1	poly(A) RNA binding [GO:0044822]	2	cytoplasm [GO:0005737];extracellular exosome [GO:0070062]
P19961	P16233	Alpha-amylase 2B (EC 3.2.1.1) (1,4-alpha-D-glucan glucanohydrolase 2B) (Carcinoid alpha-amylase)	Pancreatic triacylglycerol lipase (PL) (PTL) (Pancreatic lipase) (EC 3.1.1.3)	0.43	42	35	28	0	no	1	2	NF	0	0	No	NA	No	0	NF	1	metal ion binding [GO:0046872]	0	NF
P58876	P16104	Histone H2B type 1-D (HIRA-interacting protein 2) (Histone H2B.1 B) (Histone H2B.b) (H2B/b)	Histone H2AX (H2a/x) (Histone H2A.X)	0.43	1139	912	779	0	no	27	26	R-HSA-5617472;R-HSA-73777;R-HSA-606279;R-HSA-5693565;R-HSA-977225;R-HSA-427413;R-HSA-171306;R-HSA-5693571;R-HSA-5625886;R-HSA-5334118;R-HSA-5578749;R-HSA-2559586;R-HSA-912446;R-HSA-69473;R-HSA-201722;R-HSA-1221632;R-HSA-2559582;R-HSA-212300;R-HSA-5693607;R-HSA-2559580;R-HSA-73728;R-HSA-427359;R-HSA-2299718;R-HSA-427389;R-HSA-5250924	25	0	No	NA	No	1	nucleosome assembly [GO:0006334]	1	DNA binding [GO:0003677]	3	nucleus [GO:0005634];nucleoplasm [GO:0005654];extracellular exosome [GO:0070062]
P07196	P07197	Neurofilament light polypeptide (NF-L) (68 kDa neurofilament protein) (Neurofilament triplet L protein)	Neurofilament medium polypeptide (NF-M) (160 kDa neurofilament protein) (Neurofilament 3) (Neurofilament triplet M protein)	0.43	220	247	148	0	no	4	0	NF	0	0	yes	NA	No	1	neurofilament bundle assembly [GO:0033693]	1	structural constituent of cytoskeleton [GO:0005200]	2	axon [GO:0030424];neurofilament [GO:0005883]
Q99879	Q9BTM1	Histone H2B type 1-M (Histone H2B.e) (H2B/e)	Histone H2A.J (H2a/j)	0.43	1139	926	792	0	no	27	0	NF	0	0	No	NA	No	0	NF	1	DNA binding [GO:0003677]	2	nucleosome [GO:0000786];extracellular exosome [GO:0070062]
P62987	Q7Z794	Ubiquitin-60S ribosomal protein L40 (CEP52) (Ubiquitin A-52 residue ribosomal protein fusion product 1) [Cleaved into: Ubiquitin; 60S ribosomal protein L40]	Keratin, type II cytoskeletal 1b (Cytokeratin-1B) (CK-1B) (Keratin-77) (K77) (Type-II keratin Kb39)	0.43	1429	1011	934	0	NA	150	0	NF	0	0	No	NA	No	0	NF	0	NF	1	extracellular exosome [GO:0070062]
Q99878	Q99880	Histone H2A type 1-J (Histone H2A/e)	Histone H2B type 1-L (Histone H2B.c) (H2B/c)	0.43	927	1138	792	0	no	24	27	R-HSA-5578749;R-HSA-5617472;R-HSA-912446;R-HSA-2559586;R-HSA-73777;R-HSA-3214815;R-HSA-201722;R-HSA-606279;R-HSA-1221632;R-HSA-2559582;R-HSA-3214847;R-HSA-212300;R-HSA-977225;R-HSA-427413;R-HSA-171306;R-HSA-2559580;R-HSA-73728;R-HSA-427359;R-HSA-5625886;R-HSA-2299718;R-HSA-427389;R-HSA-5250924;R-HSA-5334118	23	0	No	NA	No	0	NF	1	DNA binding [GO:0003677]	3	nucleus [GO:0005634];nucleosome [GO:0000786];extracellular exosome [GO:0070062]
Q96KK5	Q99879	Histone H2A type 1-H (Histone H2A/s)	Histone H2B type 1-M (Histone H2B.e) (H2B/e)	0.43	927	1139	793	0	no	3	27	R-HSA-3214815;R-HSA-3214847	2	0	No	NA	No	0	NF	1	DNA binding [GO:0003677]	2	nucleosome [GO:0000786];extracellular exosome [GO:0070062]
O60814	Q93077	Histone H2B type 1-K (H2B K) (HIRA-interacting protein 1)	Histone H2A type 1-C (Histone H2A/l)	0.43	1143	921	791	0	no	27	24	R-HSA-5617472;R-HSA-73777;R-HSA-606279;R-HSA-3214847;R-HSA-977225;R-HSA-427413;R-HSA-171306;R-HSA-5625886;R-HSA-5334118;R-HSA-5578749;R-HSA-2559586;R-HSA-912446;R-HSA-3214815;R-HSA-201722;R-HSA-1221632;R-HSA-2559582;R-HSA-212300;R-HSA-2559580;R-HSA-73728;R-HSA-427359;R-HSA-2299718;R-HSA-427389;R-HSA-5250924	23	0	No	NA	No	0	NF	1	DNA binding [GO:0003677]	1	nucleus [GO:0005634]
O75390	P22695	Citrate synthase, mitochondrial (EC 2.3.3.1) (Citrate (Si)-synthase)	Cytochrome b-c1 complex subunit 2, mitochondrial (Complex III subunit 2) (Core protein II) (Ubiquinol-cytochrome-c reductase complex core protein 2)	0.43	739	722	483	0	no	2	1	NF	0	0	No	NA	No	0	NF	0	NF	2	extracellular exosome [GO:0070062];mitochondrion [GO:0005739]
Q9BVA1	A5A3E0	Tubulin beta-2B chain	POTE ankyrin domain family member F (ANKRD26-like family C member 1B) (Chimeric POTE-actin protein)	0.43	1478	1691	1401	0	no	22	0	NF	0	0	No	NA	No	0	NF	0	NF	0	NF
P33778	P20671	Histone H2B type 1-B (Histone H2B.1) (Histone H2B.f) (H2B/f)	Histone H2A type 1-D (Histone H2A.3) (Histone H2A/g)	0.43	1138	924	790	0	yes	27	24	R-HSA-5617472;R-HSA-73777;R-HSA-606279;R-HSA-3214847;R-HSA-977225;R-HSA-427413;R-HSA-171306;R-HSA-5625886;R-HSA-5334118;R-HSA-5578749;R-HSA-2559586;R-HSA-912446;R-HSA-3214815;R-HSA-201722;R-HSA-1221632;R-HSA-2559582;R-HSA-212300;R-HSA-2559580;R-HSA-73728;R-HSA-427359;R-HSA-2299718;R-HSA-427389;R-HSA-5250924	23	0	No	NA	No	0	NF	1	DNA binding [GO:0003677]	2	nucleus [GO:0005634];nucleosome [GO:0000786]
Q99879	P16104	Histone H2B type 1-M (Histone H2B.e) (H2B/e)	Histone H2AX (H2a/x) (Histone H2A.X)	0.43	1139	912	779	0	yes	27	26	R-HSA-5617472;R-HSA-73777;R-HSA-606279;R-HSA-5693565;R-HSA-977225;R-HSA-427413;R-HSA-171306;R-HSA-5693571;R-HSA-5625886;R-HSA-5334118;R-HSA-5578749;R-HSA-2559586;R-HSA-912446;R-HSA-69473;R-HSA-201722;R-HSA-1221632;R-HSA-2559582;R-HSA-212300;R-HSA-5693607;R-HSA-2559580;R-HSA-73728;R-HSA-427359;R-HSA-2299718;R-HSA-427389;R-HSA-5250924	25	0	No	1227_H2AX complex II	No	1	nucleosome assembly [GO:0006334]	1	DNA binding [GO:0003677]	4	nucleus [GO:0005634];nucleosome [GO:0000786];nucleoplasm [GO:0005654];extracellular exosome [GO:0070062]
P16104	Q8N257	Histone H2AX (H2a/x) (Histone H2A.X)	Histone H2B type 3-B (H2B type 12)	0.43	912	1134	778	0	no	26	27	R-HSA-5617472;R-HSA-73777;R-HSA-606279;R-HSA-5693565;R-HSA-977225;R-HSA-427413;R-HSA-171306;R-HSA-5693571;R-HSA-5625886;R-HSA-5334118;R-HSA-5578749;R-HSA-2559586;R-HSA-912446;R-HSA-69473;R-HSA-201722;R-HSA-1221632;R-HSA-2559582;R-HSA-212300;R-HSA-5693607;R-HSA-2559580;R-HSA-73728;R-HSA-427359;R-HSA-2299718;R-HSA-427389;R-HSA-5250924	25	0	No	1223_H2AX complex, isolated from cells without IR exposure;1227_H2AX complex II;1226_H2AX complex I	No	1	nucleosome assembly [GO:0006334]	1	DNA binding [GO:0003677]	2	nucleus [GO:0005634];nucleoplasm [GO:0005654]
Q99879	Q16777	Histone H2B type 1-M (Histone H2B.e) (H2B/e)	Histone H2A type 2-C (Histone H2A-GL101) (Histone H2A/q)	0.43	1139	922	789	0	no	27	24	R-HSA-5617472;R-HSA-73777;R-HSA-606279;R-HSA-3214847;R-HSA-977225;R-HSA-427413;R-HSA-171306;R-HSA-5625886;R-HSA-5334118;R-HSA-5578749;R-HSA-2559586;R-HSA-912446;R-HSA-3214815;R-HSA-201722;R-HSA-1221632;R-HSA-2559582;R-HSA-212300;R-HSA-2559580;R-HSA-73728;R-HSA-427359;R-HSA-2299718;R-HSA-427389;R-HSA-5250924	23	0	No	NA	No	0	NF	1	DNA binding [GO:0003677]	3	nucleus [GO:0005634];nucleosome [GO:0000786];extracellular exosome [GO:0070062]
P62805	Q93079	Histone H4	Histone H2B type 1-H (Histone H2B.j) (H2B/j)	0.43	1115	1144	922	0	no	30	27	R-HSA-5617472;R-HSA-73777;R-HSA-5693565;R-HSA-606279;R-HSA-3214847;R-HSA-977225;R-HSA-427413;R-HSA-171306;R-HSA-5693571;R-HSA-5625886;R-HSA-5334118;R-HSA-5578749;R-HSA-912446;R-HSA-2559586;R-HSA-3214815;R-HSA-69473;R-HSA-201722;R-HSA-1221632;R-HSA-2559582;R-HSA-212300;R-HSA-5693607;R-HSA-2559580;R-HSA-73728;R-HSA-427359;R-HSA-2299718;R-HSA-427389;R-HSA-5250924	27	0	No	NA	No	1	nucleosome assembly [GO:0006334]	1	DNA binding [GO:0003677]	4	nucleus [GO:0005634];nucleosome [GO:0000786];nucleoplasm [GO:0005654];extracellular exosome [GO:0070062]
P22314	Q00839	Ubiquitin-like modifier-activating enzyme 1 (EC 6.2.1.45) (Protein A1S9) (Ubiquitin-activating enzyme E1)	Heterogeneous nuclear ribonucleoprotein U (hnRNP U) (Scaffold attachment factor A) (SAF-A) (p120) (pp120)	0.43	1114	1002	772	0	no	1	2	NF	0	0	No	NA	No	0	NF	2	ATP binding [GO:0005524];poly(A) RNA binding [GO:0044822]	1	nucleus [GO:0005634]
P04431	P01596	Ig kappa chain V-I region Walker	Ig kappa chain V-I region CAR	0.43	81	44	39	0	no	14	14	R-HSA-2871796;R-HSA-2730905;R-HSA-166663;R-HSA-173623;R-HSA-2871837;R-HSA-2168880;R-HSA-2454202;R-HSA-2029485;R-HSA-5690714;R-HSA-2871809;R-HSA-198933;R-HSA-2029481;R-HSA-983695;R-HSA-2029482	14	NA	NA	NA	No	0	NA	0	NA	0	NA
O60814	P20671	Histone H2B type 1-K (H2B K) (HIRA-interacting protein 1)	Histone H2A type 1-D (Histone H2A.3) (Histone H2A/g)	0.43	1143	924	794	0	no	27	24	R-HSA-5617472;R-HSA-73777;R-HSA-606279;R-HSA-3214847;R-HSA-977225;R-HSA-427413;R-HSA-171306;R-HSA-5625886;R-HSA-5334118;R-HSA-5578749;R-HSA-2559586;R-HSA-912446;R-HSA-3214815;R-HSA-201722;R-HSA-1221632;R-HSA-2559582;R-HSA-212300;R-HSA-2559580;R-HSA-73728;R-HSA-427359;R-HSA-2299718;R-HSA-427389;R-HSA-5250924	23	0	No	NA	No	0	NF	1	DNA binding [GO:0003677]	1	nucleus [GO:0005634]
P12109	P55268	Collagen alpha-1(VI) chain	Laminin subunit beta-2 (Laminin B1s chain) (Laminin-11 subunit beta) (Laminin-14 subunit beta) (Laminin-15 subunit beta) (Laminin-3 subunit beta) (Laminin-4 subunit beta) (Laminin-7 subunit beta) (Laminin-9 subunit beta) (S-laminin subunit beta) (S-LAM beta)	0.43	960	712	618	0	no	7	3	R-HSA-3000178	1	0	No	NA	No	2	extracellular matrix organization [GO:0030198];cell adhesion [GO:0007155]	0	NF	2	extracellular region [GO:0005576];extracellular exosome [GO:0070062]
P20671	Q99877	Histone H2A type 1-D (Histone H2A.3) (Histone H2A/g)	Histone H2B type 1-N (Histone H2B.d) (H2B/d)	0.43	924	1140	790	0	no	24	27	R-HSA-5578749;R-HSA-5617472;R-HSA-912446;R-HSA-2559586;R-HSA-73777;R-HSA-3214815;R-HSA-201722;R-HSA-606279;R-HSA-1221632;R-HSA-2559582;R-HSA-3214847;R-HSA-212300;R-HSA-977225;R-HSA-427413;R-HSA-171306;R-HSA-2559580;R-HSA-73728;R-HSA-427359;R-HSA-5625886;R-HSA-2299718;R-HSA-427389;R-HSA-5250924;R-HSA-5334118	23	0	No	NA	No	0	NF	1	DNA binding [GO:0003677]	3	nucleus [GO:0005634];nucleosome [GO:0000786];extracellular exosome [GO:0070062]
P62979	Q7Z794	Ubiquitin-40S ribosomal protein S27a (Ubiquitin carboxyl extension protein 80) [Cleaved into: Ubiquitin; 40S ribosomal protein S27a]	Keratin, type II cytoskeletal 1b (Cytokeratin-1B) (CK-1B) (Keratin-77) (K77) (Type-II keratin Kb39)	0.43	1435	1011	938	0	NA	153	0	NF	0	0	No	NA	Yes	0	NF	0	NF	1	extracellular exosome [GO:0070062]
O75452	P28845	Retinol dehydrogenase 16 (EC 1.1.-.-) (Microsomal NAD(+)-dependent retinol dehydrogenase 4) (RoDH-4) (Short chain dehydrogenase/reductase family 9C member 8) (Sterol/retinol dehydrogenase)	Corticosteroid 11-beta-dehydrogenase isozyme 1 (EC 1.1.1.146) (11-beta-hydroxysteroid dehydrogenase 1) (11-DH) (11-beta-HSD1) (Short chain dehydrogenase/reductase family 26C member 1)	0.43	54	65	40	0	no	2	1	NF	0	0	No	NA	No	0	NF	0	NF	2	integral component of membrane [GO:0016021];endoplasmic reticulum membrane [GO:0005789]
Q8N257	Q93077	Histone H2B type 3-B (H2B type 12)	Histone H2A type 1-C (Histone H2A/l)	0.43	1134	921	786	0	no	27	24	R-HSA-5617472;R-HSA-73777;R-HSA-606279;R-HSA-3214847;R-HSA-977225;R-HSA-427413;R-HSA-171306;R-HSA-5625886;R-HSA-5334118;R-HSA-5578749;R-HSA-2559586;R-HSA-912446;R-HSA-3214815;R-HSA-201722;R-HSA-1221632;R-HSA-2559582;R-HSA-212300;R-HSA-2559580;R-HSA-73728;R-HSA-427359;R-HSA-2299718;R-HSA-427389;R-HSA-5250924	23	0	No	NA	No	0	NF	1	DNA binding [GO:0003677]	1	nucleus [GO:0005634]
P0CG47	Q7Z794	Polyubiquitin-B [Cleaved into: Ubiquitin]	Keratin, type II cytoskeletal 1b (Cytokeratin-1B) (CK-1B) (Keratin-77) (K77) (Type-II keratin Kb39)	0.43	1428	1011	934	0	NA	139	0	NF	0	0	No	NA	No	0	NF	0	NF	1	extracellular exosome [GO:0070062]
Q7L7L0	P23527	Histone H2A type 3	Histone H2B type 1-O (Histone H2B.2) (Histone H2B.n) (H2B/n)	0.43	917	1141	786	0	no	3	27	R-HSA-3214815;R-HSA-3214847	2	0	No	NA	No	0	NF	1	DNA binding [GO:0003677]	1	nuclear nucleosome [GO:0000788]
Q99880	Q16777	Histone H2B type 1-L (Histone H2B.c) (H2B/c)	Histone H2A type 2-C (Histone H2A-GL101) (Histone H2A/q)	0.43	1138	922	788	0	no	27	24	R-HSA-5617472;R-HSA-73777;R-HSA-606279;R-HSA-3214847;R-HSA-977225;R-HSA-427413;R-HSA-171306;R-HSA-5625886;R-HSA-5334118;R-HSA-5578749;R-HSA-2559586;R-HSA-912446;R-HSA-3214815;R-HSA-201722;R-HSA-1221632;R-HSA-2559582;R-HSA-212300;R-HSA-2559580;R-HSA-73728;R-HSA-427359;R-HSA-2299718;R-HSA-427389;R-HSA-5250924	23	0	No	NA	No	0	NF	1	DNA binding [GO:0003677]	3	nucleus [GO:0005634];nucleosome [GO:0000786];extracellular exosome [GO:0070062]
Q13509	P06733	Tubulin beta-3 chain (Tubulin beta-4 chain) (Tubulin beta-III)	Alpha-enolase (EC 4.2.1.11) (2-phospho-D-glycerate hydro-lyase) (C-myc promoter-binding protein) (Enolase 1) (MBP-1) (MPB-1) (Non-neural enolase) (NNE) (Phosphopyruvate hydratase) (Plasminogen-binding protein)	0.43	1390	1341	1131	0	NA	22	2	NF	0	0	No	NA	No	0	NF	0	NF	3	nucleus [GO:0005634];cytoplasm [GO:0005737];extracellular exosome [GO:0070062]
P62987	P0CG38	Ubiquitin-60S ribosomal protein L40 (CEP52) (Ubiquitin A-52 residue ribosomal protein fusion product 1) [Cleaved into: Ubiquitin; 60S ribosomal protein L40]	POTE ankyrin domain family member I	0.43	1429	1639	1327	0	NA	150	0	NF	0	0	No	NA	No	0	NF	0	NF	2	extracellular space [GO:0005615];extracellular exosome [GO:0070062]
P00558	Q562R1	Phosphoglycerate kinase 1 (EC 2.7.2.3) (Cell migration-inducing gene 10 protein) (Primer recognition protein 2) (PRP 2)	Beta-actin-like protein 2 (Kappa-actin)	0.43	1111	1613	1054	0	no	2	0	NF	0	0	No	NA	No	0	NF	1	ATP binding [GO:0005524]	1	extracellular exosome [GO:0070062]
P62805	Q5QNW6	Histone H4	Histone H2B type 2-F	0.43	1115	1144	922	0	no	30	2	R-HSA-3214847;R-HSA-3214815	2	0	No	NA	No	1	nucleosome assembly [GO:0006334]	1	DNA binding [GO:0003677]	3	nucleus [GO:0005634];nucleoplasm [GO:0005654];extracellular exosome [GO:0070062]
P23527	Q93077	Histone H2B type 1-O (Histone H2B.2) (Histone H2B.n) (H2B/n)	Histone H2A type 1-C (Histone H2A/l)	0.43	1141	921	790	0	no	27	24	R-HSA-5617472;R-HSA-73777;R-HSA-606279;R-HSA-3214847;R-HSA-977225;R-HSA-427413;R-HSA-171306;R-HSA-5625886;R-HSA-5334118;R-HSA-5578749;R-HSA-2559586;R-HSA-912446;R-HSA-3214815;R-HSA-201722;R-HSA-1221632;R-HSA-2559582;R-HSA-212300;R-HSA-2559580;R-HSA-73728;R-HSA-427359;R-HSA-2299718;R-HSA-427389;R-HSA-5250924	23	0	No	NA	No	0	NF	1	DNA binding [GO:0003677]	2	nucleus [GO:0005634];nucleosome [GO:0000786]
Q9BVA1	Q9BYX7	Tubulin beta-2B chain	Putative beta-actin-like protein 3 (Kappa-actin) (POTE ankyrin domain family member K)	0.43	1478	1687	1394	0	no	22	1	NF	0	NA	NA	NA	No	0	NF	0	NF	0	NF
Q99880	Q9BTM1	Histone H2B type 1-L (Histone H2B.c) (H2B/c)	Histone H2A.J (H2a/j)	0.43	1138	926	791	0	no	27	0	NF	0	0	No	NA	No	0	NF	1	DNA binding [GO:0003677]	2	nucleosome [GO:0000786];extracellular exosome [GO:0070062]
P55084	P07954	Trifunctional enzyme subunit beta, mitochondrial (TP-beta) [Includes: 3-ketoacyl-CoA thiolase (EC 2.3.1.16) (Acetyl-CoA acyltransferase) (Beta-ketothiolase)]	Fumarate hydratase, mitochondrial (Fumarase) (EC 4.2.1.2)	0.43	726	639	467	0	no	7	1	NF	0	0	No	NA	No	0	NF	0	NF	2	extracellular exosome [GO:0070062];mitochondrion [GO:0005739]
O75969	Q5JQC9	A-kinase anchor protein 3 (AKAP-3) (A-kinase anchor protein 110 kDa) (AKAP 110) (Cancer/testis antigen 82) (CT82) (Fibrous sheath protein of 95 kDa) (FSP95) (Fibrousheathin I) (Fibrousheathin-1) (Protein kinase A-anchoring protein 3) (PRKA3) (Sperm oocyte-binding protein)	A-kinase anchor protein 4 (AKAP-4) (A-kinase anchor protein 82 kDa) (AKAP 82) (hAKAP82) (Major sperm fibrous sheath protein) (HI) (Protein kinase A-anchoring protein 4) (PRKA4)	0.43	17	20	13	0	yes	0	0	NF	0	0	yes	NA	No	4	regulation of protein kinase A signaling [GO:0010738];movement of cell or subcellular component [GO:0006928];single fertilization [GO:0007338];transmembrane receptor protein serine/threonine kinase signaling pathway [GO:0007178]	1	protein kinase A binding [GO:0051018]	4	nucleus [GO:0005634];sperm fibrous sheath [GO:0035686];cytoplasm [GO:0005737];sperm principal piece [GO:0097228]
P02008	P02100	Hemoglobin subunit zeta (HBAZ) (Hemoglobin zeta chain) (Zeta-globin)	Hemoglobin subunit epsilon (Epsilon-globin) (Hemoglobin epsilon chain)	0.43	787	931	598	1	no	0	1	NF	0	0	yes	NA	No	0	NF	4	heme binding [GO:0020037];iron ion binding [GO:0005506];oxygen binding [GO:0019825];oxygen transporter activity [GO:0005344]	1	hemoglobin complex [GO:0005833]
P62807	P62805	Histone H2B type 1-C/E/F/G/I (Histone H2B.1 A) (Histone H2B.a) (H2B/a) (Histone H2B.g) (H2B/g) (Histone H2B.h) (H2B/h) (Histone H2B.k) (H2B/k) (Histone H2B.l) (H2B/l)	Histone H4	0.43	1144	1115	924	0	no	27	30	R-HSA-5617472;R-HSA-73777;R-HSA-606279;R-HSA-5693565;R-HSA-3214847;R-HSA-977225;R-HSA-427413;R-HSA-171306;R-HSA-5693571;R-HSA-5625886;R-HSA-5334118;R-HSA-5578749;R-HSA-2559586;R-HSA-912446;R-HSA-3214815;R-HSA-69473;R-HSA-201722;R-HSA-1221632;R-HSA-2559582;R-HSA-212300;R-HSA-5693607;R-HSA-2559580;R-HSA-73728;R-HSA-427359;R-HSA-2299718;R-HSA-427389;R-HSA-5250924	27	0	No	NA	No	1	nucleosome assembly [GO:0006334]	1	DNA binding [GO:0003677]	4	nucleus [GO:0005634];nucleosome [GO:0000786];nucleoplasm [GO:0005654];extracellular exosome [GO:0070062]
P48735	P22695	Isocitrate dehydrogenase [NADP], mitochondrial (IDH) (EC 1.1.1.42) (ICD-M) (IDP) (NADP(+)-specific ICDH) (Oxalosuccinate decarboxylase)	Cytochrome b-c1 complex subunit 2, mitochondrial (Complex III subunit 2) (Core protein II) (Ubiquinol-cytochrome-c reductase complex core protein 2)	0.43	817	722	537	0	no	1	1	NF	0	0	No	NA	No	0	NF	0	NF	3	mitochondrial inner membrane [GO:0005743];extracellular exosome [GO:0070062];mitochondrion [GO:0005739]
P33778	Q7L7L0	Histone H2B type 1-B (Histone H2B.1) (Histone H2B.f) (H2B/f)	Histone H2A type 3	0.43	1138	917	783	0	no	27	3	R-HSA-3214847;R-HSA-3214815	2	0	No	NA	No	0	NF	1	DNA binding [GO:0003677]	1	nuclear nucleosome [GO:0000788]
P0CG38	P0CG47	POTE ankyrin domain family member I	Polyubiquitin-B [Cleaved into: Ubiquitin]	0.43	1639	1428	1326	0	NA	0	139	NF	0	0	No	NA	No	0	NF	1		2	extracellular space [GO:0005615];extracellular exosome [GO:0070062]
P0CG38	P0CG48	POTE ankyrin domain family member I	Polyubiquitin-C [Cleaved into: Ubiquitin]	0.43	1639	1428	1326	0	NA	0	139	NF	0	0	No	NA	No	0	NF	0	NF	2	extracellular space [GO:0005615];extracellular exosome [GO:0070062]
Q99877	Q6FI13	Histone H2B type 1-N (Histone H2B.d) (H2B/d)	Histone H2A type 2-A (Histone H2A.2) (Histone H2A/o)	0.43	1140	923	790	0	no	27	24	R-HSA-5617472;R-HSA-73777;R-HSA-606279;R-HSA-3214847;R-HSA-977225;R-HSA-427413;R-HSA-171306;R-HSA-5625886;R-HSA-5334118;R-HSA-5578749;R-HSA-2559586;R-HSA-912446;R-HSA-3214815;R-HSA-201722;R-HSA-1221632;R-HSA-2559582;R-HSA-212300;R-HSA-2559580;R-HSA-73728;R-HSA-427359;R-HSA-2299718;R-HSA-427389;R-HSA-5250924	23	0	No	NA	No	0	NF	1	DNA binding [GO:0003677]	3	nucleus [GO:0005634];nucleosome [GO:0000786];extracellular exosome [GO:0070062]
Q99880	Q93077	Histone H2B type 1-L (Histone H2B.c) (H2B/c)	Histone H2A type 1-C (Histone H2A/l)	0.43	1138	921	786	0	no	27	24	R-HSA-5617472;R-HSA-73777;R-HSA-606279;R-HSA-3214847;R-HSA-977225;R-HSA-427413;R-HSA-171306;R-HSA-5625886;R-HSA-5334118;R-HSA-5578749;R-HSA-2559586;R-HSA-912446;R-HSA-3214815;R-HSA-201722;R-HSA-1221632;R-HSA-2559582;R-HSA-212300;R-HSA-2559580;R-HSA-73728;R-HSA-427359;R-HSA-2299718;R-HSA-427389;R-HSA-5250924	23	0	No	NA	No	0	NF	1	DNA binding [GO:0003677]	3	nucleus [GO:0005634];nucleosome [GO:0000786];extracellular exosome [GO:0070062]
Q93079	P20671	Histone H2B type 1-H (Histone H2B.j) (H2B/j)	Histone H2A type 1-D (Histone H2A.3) (Histone H2A/g)	0.43	1144	924	794	0	no	27	24	R-HSA-5617472;R-HSA-73777;R-HSA-606279;R-HSA-3214847;R-HSA-977225;R-HSA-427413;R-HSA-171306;R-HSA-5625886;R-HSA-5334118;R-HSA-5578749;R-HSA-2559586;R-HSA-912446;R-HSA-3214815;R-HSA-201722;R-HSA-1221632;R-HSA-2559582;R-HSA-212300;R-HSA-2559580;R-HSA-73728;R-HSA-427359;R-HSA-2299718;R-HSA-427389;R-HSA-5250924	23	0	No	NA	No	0	NF	1	DNA binding [GO:0003677]	3	nucleus [GO:0005634];nucleosome [GO:0000786];extracellular exosome [GO:0070062]
Q99880	Q6FI13	Histone H2B type 1-L (Histone H2B.c) (H2B/c)	Histone H2A type 2-A (Histone H2A.2) (Histone H2A/o)	0.43	1138	923	789	0	no	27	24	R-HSA-5617472;R-HSA-73777;R-HSA-606279;R-HSA-3214847;R-HSA-977225;R-HSA-427413;R-HSA-171306;R-HSA-5625886;R-HSA-5334118;R-HSA-5578749;R-HSA-2559586;R-HSA-912446;R-HSA-3214815;R-HSA-201722;R-HSA-1221632;R-HSA-2559582;R-HSA-212300;R-HSA-2559580;R-HSA-73728;R-HSA-427359;R-HSA-2299718;R-HSA-427389;R-HSA-5250924	23	0	No	NA	No	0	NF	1	DNA binding [GO:0003677]	3	nucleus [GO:0005634];nucleosome [GO:0000786];extracellular exosome [GO:0070062]
P20671	P58876	Histone H2A type 1-D (Histone H2A.3) (Histone H2A/g)	Histone H2B type 1-D (HIRA-interacting protein 2) (Histone H2B.1 B) (Histone H2B.b) (H2B/b)	0.43	924	1139	790	0	no	24	27	R-HSA-5578749;R-HSA-5617472;R-HSA-912446;R-HSA-2559586;R-HSA-73777;R-HSA-3214815;R-HSA-201722;R-HSA-606279;R-HSA-1221632;R-HSA-2559582;R-HSA-3214847;R-HSA-212300;R-HSA-977225;R-HSA-427413;R-HSA-171306;R-HSA-2559580;R-HSA-73728;R-HSA-427359;R-HSA-5625886;R-HSA-2299718;R-HSA-427389;R-HSA-5250924;R-HSA-5334118	23	0	No	NA	No	0	NF	1	DNA binding [GO:0003677]	2	nucleus [GO:0005634];extracellular exosome [GO:0070062]
P22310	P35503	UDP-glucuronosyltransferase 1-4 (UDPGT 1-4) (UGT1*4) (UGT1-04) (UGT1.4) (EC 2.4.1.17) (Bilirubin-specific UDPGT isozyme 2) (hUG-BR2) (UDP-glucuronosyltransferase 1-D) (UGT-1D) (UGT1D) (UDP-glucuronosyltransferase 1A4)	UDP-glucuronosyltransferase 1-3 (UDPGT 1-3) (UGT1*3) (UGT1-03) (UGT1.3) (EC 2.4.1.17) (UDP-glucuronosyltransferase 1-C) (UGT-1C) (UGT1C) (UDP-glucuronosyltransferase 1A3)	0.43	33	31	27	1	no	3	1	R-HSA-156588	1	0	yes	NA	No	7	flavonoid biosynthetic process [GO:0009813];negative regulation of fatty acid metabolic process [GO:0045922];cellular glucuronidation [GO:0052695];negative regulation of glucuronosyltransferase activity [GO:1904224];xenobiotic glucuronidation [GO:0052697];flavonoid glucuronidation [GO:0052696];negative regulation of cellular glucuronidation [GO:2001030]	4	protein heterodimerization activity [GO:0046982];glucuronosyltransferase activity [GO:0015020];enzyme binding [GO:0019899];protein homodimerization activity [GO:0042803]	3	endoplasmic reticulum [GO:0005783];integral component of membrane [GO:0016021];endoplasmic reticulum membrane [GO:0005789]
Q93077	P57053	Histone H2A type 1-C (Histone H2A/l)	Histone H2B type F-S (Histone H2B.s) (H2B/s)	0.43	921	1142	790	0	no	24	25	R-HSA-5578749;R-HSA-5617472;R-HSA-912446;R-HSA-2559586;R-HSA-73777;R-HSA-201722;R-HSA-606279;R-HSA-1221632;R-HSA-2559582;R-HSA-212300;R-HSA-977225;R-HSA-427413;R-HSA-171306;R-HSA-2559580;R-HSA-73728;R-HSA-427359;R-HSA-5625886;R-HSA-2299718;R-HSA-427389;R-HSA-5250924;R-HSA-5334118	21	0	No	NA	No	0	NF	1	DNA binding [GO:0003677]	1	nucleus [GO:0005634]
Q99879	Q93077	Histone H2B type 1-M (Histone H2B.e) (H2B/e)	Histone H2A type 1-C (Histone H2A/l)	0.43	1139	921	787	0	no	27	24	R-HSA-5617472;R-HSA-73777;R-HSA-606279;R-HSA-3214847;R-HSA-977225;R-HSA-427413;R-HSA-171306;R-HSA-5625886;R-HSA-5334118;R-HSA-5578749;R-HSA-2559586;R-HSA-912446;R-HSA-3214815;R-HSA-201722;R-HSA-1221632;R-HSA-2559582;R-HSA-212300;R-HSA-2559580;R-HSA-73728;R-HSA-427359;R-HSA-2299718;R-HSA-427389;R-HSA-5250924	23	0	No	NA	No	0	NF	1	DNA binding [GO:0003677]	3	nucleus [GO:0005634];nucleosome [GO:0000786];extracellular exosome [GO:0070062]
P33778	P16104	Histone H2B type 1-B (Histone H2B.1) (Histone H2B.f) (H2B/f)	Histone H2AX (H2a/x) (Histone H2A.X)	0.43	1138	912	779	0	no	27	26	R-HSA-5617472;R-HSA-73777;R-HSA-606279;R-HSA-5693565;R-HSA-977225;R-HSA-427413;R-HSA-171306;R-HSA-5693571;R-HSA-5625886;R-HSA-5334118;R-HSA-5578749;R-HSA-2559586;R-HSA-912446;R-HSA-69473;R-HSA-201722;R-HSA-1221632;R-HSA-2559582;R-HSA-212300;R-HSA-5693607;R-HSA-2559580;R-HSA-73728;R-HSA-427359;R-HSA-2299718;R-HSA-427389;R-HSA-5250924	25	0	No	1227_H2AX complex II	No	1	nucleosome assembly [GO:0006334]	1	DNA binding [GO:0003677]	3	nucleus [GO:0005634];nucleosome [GO:0000786];nucleoplasm [GO:0005654]
P11142	P08238	Heat shock cognate 71 kDa protein (Heat shock 70 kDa protein 8) (Lipopolysaccharide-associated protein 1) (LAP-1) (LPS-associated protein 1)	Heat shock protein HSP 90-beta (HSP 90) (Heat shock 84 kDa) (HSP 84) (HSP84)	0.43	1434	1514	1290	0	yes	9	8	R-HSA-3371571;R-HSA-3371568	2	0	No	2721_HCF-1 complex;725_P2X7 receptor signalling complex	No	3	protein folding [GO:0006457];response to unfolded protein [GO:0006986];regulation of cellular response to heat [GO:1900034]	4	cadherin binding involved in cell-cell adhesion [GO:0098641];ATP binding [GO:0005524];MHC class II protein complex binding [GO:0023026];poly(A) RNA binding [GO:0044822]	6	cell-cell adherens junction [GO:0005913];cytosol [GO:0005829];nucleoplasm [GO:0005654];membrane [GO:0016020];melanosome [GO:0042470];extracellular exosome [GO:0070062]
P01602	P01610	Ig heavy chain V-I region 5 (Ig kappa chain V-I region HK102) (Immunoglobulin kappa variable 1-5) (Fragment)	Ig kappa chain V-I region WEA	0.43	88	99	58	0	no	14	14	R-HSA-2871796;R-HSA-2730905;R-HSA-166663;R-HSA-173623;R-HSA-2871837;R-HSA-2168880;R-HSA-2454202;R-HSA-2029485;R-HSA-5690714;R-HSA-2871809;R-HSA-198933;R-HSA-2029481;R-HSA-983695;R-HSA-2029482	14	NA	NA	NA	No	0	NA	0	NA	0	NA
Q05639	P62979	Elongation factor 1-alpha 2 (EF-1-alpha-2) (Eukaryotic elongation factor 1 A-2) (eEF1A-2) (Statin-S1)	Ubiquitin-40S ribosomal protein S27a (Ubiquitin carboxyl extension protein 80) [Cleaved into: Ubiquitin; 40S ribosomal protein S27a]	0.43	1397	1435	1171	0	NA	1	153	NF	0	0	No	NA	Yes	1	positive regulation of apoptotic process [GO:0043065]	0	NF	1	cytoplasm [GO:0005737]
P01606	P01598	Ig kappa chain V-I region OU	Ig kappa chain V-I region EU	0.43	81	81	48	0	no	14	14	R-HSA-2871796;R-HSA-2730905;R-HSA-166663;R-HSA-173623;R-HSA-2871837;R-HSA-2168880;R-HSA-2454202;R-HSA-2029485;R-HSA-5690714;R-HSA-2871809;R-HSA-198933;R-HSA-2029481;R-HSA-983695;R-HSA-2029482	14	NA	NA	NA	No	0	NA	0	NA	0	NA
P04350	Q9BYX7	Tubulin beta-4A chain (Tubulin 5 beta) (Tubulin beta-4 chain)	Putative beta-actin-like protein 3 (Kappa-actin) (POTE ankyrin domain family member K)	0.43	1415	1687	1342	0	no	28	1	NF	0	NA	NA	NA	No	0	NF	0	NF	2	cytosol [GO:0005829];extracellular exosome [GO:0070062]
P58876	Q16777	Histone H2B type 1-D (HIRA-interacting protein 2) (Histone H2B.1 B) (Histone H2B.b) (H2B/b)	Histone H2A type 2-C (Histone H2A-GL101) (Histone H2A/q)	0.43	1139	922	789	0	no	27	24	R-HSA-5617472;R-HSA-73777;R-HSA-606279;R-HSA-3214847;R-HSA-977225;R-HSA-427413;R-HSA-171306;R-HSA-5625886;R-HSA-5334118;R-HSA-5578749;R-HSA-2559586;R-HSA-912446;R-HSA-3214815;R-HSA-201722;R-HSA-1221632;R-HSA-2559582;R-HSA-212300;R-HSA-2559580;R-HSA-73728;R-HSA-427359;R-HSA-2299718;R-HSA-427389;R-HSA-5250924	23	0	No	NA	No	0	NF	1	DNA binding [GO:0003677]	2	nucleus [GO:0005634];extracellular exosome [GO:0070062]
Q562R1	P04075	Beta-actin-like protein 2 (Kappa-actin)	Fructose-bisphosphate aldolase A (EC 4.1.2.13) (Lung cancer antigen NY-LU-1) (Muscle-type aldolase)	0.43	1613	1132	1060	0	no	0	3	NF	0	0	No	NA	No	0	NF	0	NF	2	extracellular space [GO:0005615];extracellular exosome [GO:0070062]
P21796	P07195	Voltage-dependent anion-selective channel protein 1 (VDAC-1) (hVDAC1) (Outer mitochondrial membrane protein porin 1) (Plasmalemmal porin) (Porin 31HL) (Porin 31HM)	L-lactate dehydrogenase B chain (LDH-B) (EC 1.1.1.27) (LDH heart subunit) (LDH-H) (Renal carcinoma antigen NY-REN-46)	0.43	860	1087	713	0	no	2	1	NF	0	0	No	NA	No	0	NF	0	NF	5	membrane raft [GO:0045121];myelin sheath [GO:0043209];mitochondrion [GO:0005739];extracellular exosome [GO:0070062];membrane [GO:0016020]
Q99880	P16104	Histone H2B type 1-L (Histone H2B.c) (H2B/c)	Histone H2AX (H2a/x) (Histone H2A.X)	0.43	1138	912	778	0	no	27	26	R-HSA-5617472;R-HSA-73777;R-HSA-606279;R-HSA-5693565;R-HSA-977225;R-HSA-427413;R-HSA-171306;R-HSA-5693571;R-HSA-5625886;R-HSA-5334118;R-HSA-5578749;R-HSA-2559586;R-HSA-912446;R-HSA-69473;R-HSA-201722;R-HSA-1221632;R-HSA-2559582;R-HSA-212300;R-HSA-5693607;R-HSA-2559580;R-HSA-73728;R-HSA-427359;R-HSA-2299718;R-HSA-427389;R-HSA-5250924	25	0	No	NA	No	1	nucleosome assembly [GO:0006334]	1	DNA binding [GO:0003677]	4	nucleus [GO:0005634];nucleosome [GO:0000786];nucleoplasm [GO:0005654];extracellular exosome [GO:0070062]
P0CG38	Q9BVA1	POTE ankyrin domain family member I	Tubulin beta-2B chain	0.43	1639	1478	1355	0	no	0	22	NF	0	0	No	NA	No	0	NF	0	NF	0	NF
Q14032	P10632	Bile acid-CoA:amino acid N-acyltransferase (BACAT) (BAT) (EC 2.3.1.65) (Glycine N-choloyltransferase) (Long-chain fatty-acyl-CoA hydrolase) (EC 3.1.2.2)	Cytochrome P450 2C8 (EC 1.14.14.1) (CYPIIC8) (Cytochrome P450 IIC2) (Cytochrome P450 MP-12) (Cytochrome P450 MP-20) (Cytochrome P450 form 1) (S-mephenytoin 4-hydroxylase)	0.43	64	54	42	0	no	2	4	NF	0	0	No	NA	No	0	NF	0	NF	0	NF
P07900	P11021	Heat shock protein HSP 90-alpha (Heat shock 86 kDa) (HSP 86) (HSP86) (Lipopolysaccharide-associated protein 2) (LAP-2) (LPS-associated protein 2) (Renal carcinoma antigen NY-REN-38)	78 kDa glucose-regulated protein (GRP-78) (Endoplasmic reticulum lumenal Ca(2+)-binding protein grp78) (Heat shock 70 kDa protein 5) (Immunoglobulin heavy chain-binding protein) (BiP)	0.43	1500	1404	1279	0	yes	24	7	NF	0	0	No	2721_HCF-1 complex	No	0	NF	2	ATP binding [GO:0005524];ATPase activity [GO:0016887]	8	extracellular matrix [GO:0031012];extracellular exosome [GO:0070062];cell surface [GO:0009986];myelin sheath [GO:0043209];membrane [GO:0016020];melanosome [GO:0042470];nucleus [GO:0005634];plasma membrane [GO:0005886]
Q96KK5	Q99880	Histone H2A type 1-H (Histone H2A/s)	Histone H2B type 1-L (Histone H2B.c) (H2B/c)	0.43	927	1138	792	0	no	3	27	R-HSA-3214815;R-HSA-3214847	2	0	No	NA	No	0	NF	1	DNA binding [GO:0003677]	2	nucleosome [GO:0000786];extracellular exosome [GO:0070062]
Q99879	P0C0S8	Histone H2B type 1-M (Histone H2B.e) (H2B/e)	Histone H2A type 1 (H2A.1) (Histone H2A/p)	0.43	1139	927	793	0	no	27	3	R-HSA-3214847;R-HSA-3214815	2	0	No	NA	No	0	NF	1	DNA binding [GO:0003677]	3	nucleus [GO:0005634];nucleosome [GO:0000786];extracellular exosome [GO:0070062]
P01594	P01598	Ig kappa chain V-I region AU	Ig kappa chain V-I region EU	0.43	102	81	57	0	no	14	14	R-HSA-2871796;R-HSA-2730905;R-HSA-166663;R-HSA-173623;R-HSA-2871837;R-HSA-2168880;R-HSA-2454202;R-HSA-2029485;R-HSA-5690714;R-HSA-2871809;R-HSA-198933;R-HSA-2029481;R-HSA-983695;R-HSA-2029482	14	NA	NA	NA	No	0	NA	0	NA	0	NA
P04908	P06899	Histone H2A type 1-B/E (Histone H2A.2) (Histone H2A/a) (Histone H2A/m)	Histone H2B type 1-J (Histone H2B.1) (Histone H2B.r) (H2B/r)	0.43	917	1142	788	0	no	24	27	R-HSA-5578749;R-HSA-5617472;R-HSA-912446;R-HSA-2559586;R-HSA-73777;R-HSA-3214815;R-HSA-201722;R-HSA-606279;R-HSA-1221632;R-HSA-2559582;R-HSA-3214847;R-HSA-212300;R-HSA-977225;R-HSA-427413;R-HSA-171306;R-HSA-2559580;R-HSA-73728;R-HSA-427359;R-HSA-5625886;R-HSA-2299718;R-HSA-427389;R-HSA-5250924;R-HSA-5334118	23	0	No	NA	No	0	NF	1	DNA binding [GO:0003677]	2	nucleus [GO:0005634];nucleosome [GO:0000786]
P20671	Q99879	Histone H2A type 1-D (Histone H2A.3) (Histone H2A/g)	Histone H2B type 1-M (Histone H2B.e) (H2B/e)	0.43	924	1139	790	0	no	24	27	R-HSA-5578749;R-HSA-5617472;R-HSA-912446;R-HSA-2559586;R-HSA-73777;R-HSA-3214815;R-HSA-201722;R-HSA-606279;R-HSA-1221632;R-HSA-2559582;R-HSA-3214847;R-HSA-212300;R-HSA-977225;R-HSA-427413;R-HSA-171306;R-HSA-2559580;R-HSA-73728;R-HSA-427359;R-HSA-5625886;R-HSA-2299718;R-HSA-427389;R-HSA-5250924;R-HSA-5334118	23	0	No	NA	No	0	NF	1	DNA binding [GO:0003677]	3	nucleus [GO:0005634];nucleosome [GO:0000786];extracellular exosome [GO:0070062]
P20671	P06899	Histone H2A type 1-D (Histone H2A.3) (Histone H2A/g)	Histone H2B type 1-J (Histone H2B.1) (Histone H2B.r) (H2B/r)	0.43	924	1142	795	0	no	24	27	R-HSA-5578749;R-HSA-5617472;R-HSA-912446;R-HSA-2559586;R-HSA-73777;R-HSA-3214815;R-HSA-201722;R-HSA-606279;R-HSA-1221632;R-HSA-2559582;R-HSA-3214847;R-HSA-212300;R-HSA-977225;R-HSA-427413;R-HSA-171306;R-HSA-2559580;R-HSA-73728;R-HSA-427359;R-HSA-5625886;R-HSA-2299718;R-HSA-427389;R-HSA-5250924;R-HSA-5334118	23	0	No	NA	No	0	NF	1	DNA binding [GO:0003677]	2	nucleus [GO:0005634];nucleosome [GO:0000786]
Q99877	Q16777	Histone H2B type 1-N (Histone H2B.d) (H2B/d)	Histone H2A type 2-C (Histone H2A-GL101) (Histone H2A/q)	0.43	1140	922	789	0	no	27	24	R-HSA-5617472;R-HSA-73777;R-HSA-606279;R-HSA-3214847;R-HSA-977225;R-HSA-427413;R-HSA-171306;R-HSA-5625886;R-HSA-5334118;R-HSA-5578749;R-HSA-2559586;R-HSA-912446;R-HSA-3214815;R-HSA-201722;R-HSA-1221632;R-HSA-2559582;R-HSA-212300;R-HSA-2559580;R-HSA-73728;R-HSA-427359;R-HSA-2299718;R-HSA-427389;R-HSA-5250924	23	0	No	NA	No	0	NF	1	DNA binding [GO:0003677]	3	nucleus [GO:0005634];nucleosome [GO:0000786];extracellular exosome [GO:0070062]
P62807	Q93077	Histone H2B type 1-C/E/F/G/I (Histone H2B.1 A) (Histone H2B.a) (H2B/a) (Histone H2B.g) (H2B/g) (Histone H2B.h) (H2B/h) (Histone H2B.k) (H2B/k) (Histone H2B.l) (H2B/l)	Histone H2A type 1-C (Histone H2A/l)	0.43	1144	921	791	0	no	27	24	R-HSA-5617472;R-HSA-73777;R-HSA-606279;R-HSA-3214847;R-HSA-977225;R-HSA-427413;R-HSA-171306;R-HSA-5625886;R-HSA-5334118;R-HSA-5578749;R-HSA-2559586;R-HSA-912446;R-HSA-3214815;R-HSA-201722;R-HSA-1221632;R-HSA-2559582;R-HSA-212300;R-HSA-2559580;R-HSA-73728;R-HSA-427359;R-HSA-2299718;R-HSA-427389;R-HSA-5250924	23	0	No	NA	No	0	NF	1	DNA binding [GO:0003677]	3	nucleus [GO:0005634];nucleosome [GO:0000786];extracellular exosome [GO:0070062]
P62805	Q99880	Histone H4	Histone H2B type 1-L (Histone H2B.c) (H2B/c)	0.43	1115	1138	918	0	no	30	27	R-HSA-5617472;R-HSA-73777;R-HSA-5693565;R-HSA-606279;R-HSA-3214847;R-HSA-977225;R-HSA-427413;R-HSA-171306;R-HSA-5693571;R-HSA-5625886;R-HSA-5334118;R-HSA-5578749;R-HSA-912446;R-HSA-2559586;R-HSA-3214815;R-HSA-69473;R-HSA-201722;R-HSA-1221632;R-HSA-2559582;R-HSA-212300;R-HSA-5693607;R-HSA-2559580;R-HSA-73728;R-HSA-427359;R-HSA-2299718;R-HSA-427389;R-HSA-5250924	27	0	No	NA	No	1	nucleosome assembly [GO:0006334]	1	DNA binding [GO:0003677]	4	nucleus [GO:0005634];nucleosome [GO:0000786];nucleoplasm [GO:0005654];extracellular exosome [GO:0070062]
O95678	P08779	Keratin, type II cytoskeletal 75 (Cytokeratin-75) (CK-75) (Keratin-6 hair follicle) (hK6hf) (Keratin-75) (K75) (Type II keratin-K6hf) (Type-II keratin Kb18)	Keratin, type I cytoskeletal 16 (Cytokeratin-16) (CK-16) (Keratin-16) (K16)	0.43	819	658	525	0	no	0	0	NF	0	0	No	NA	No	0	NF	0	NF	2	intermediate filament [GO:0005882];extracellular exosome [GO:0070062]
O60814	Q16777	Histone H2B type 1-K (H2B K) (HIRA-interacting protein 1)	Histone H2A type 2-C (Histone H2A-GL101) (Histone H2A/q)	0.43	1143	922	793	0	no	27	24	R-HSA-5617472;R-HSA-73777;R-HSA-606279;R-HSA-3214847;R-HSA-977225;R-HSA-427413;R-HSA-171306;R-HSA-5625886;R-HSA-5334118;R-HSA-5578749;R-HSA-2559586;R-HSA-912446;R-HSA-3214815;R-HSA-201722;R-HSA-1221632;R-HSA-2559582;R-HSA-212300;R-HSA-2559580;R-HSA-73728;R-HSA-427359;R-HSA-2299718;R-HSA-427389;R-HSA-5250924	23	0	No	NA	No	0	NF	1	DNA binding [GO:0003677]	1	nucleus [GO:0005634]
Q9BVA1	Q13885	Tubulin beta-2B chain	Tubulin beta-2A chain (Tubulin beta class IIa)	0.43	159	226	120	0	no	22	22	R-HSA-68877;R-HSA-190861;R-HSA-5610787;R-HSA-2467813;R-HSA-6807878;R-HSA-983189;R-HSA-190840;R-HSA-1445148;R-HSA-5617833;R-HSA-437239;R-HSA-380320;R-HSA-389960;R-HSA-5620924;R-HSA-6811436;R-HSA-389957;R-HSA-6811434;R-HSA-389977;R-HSA-2500257;R-HSA-5663220;R-HSA-2132295;R-HSA-8852276;R-HSA-5626467	22	0	yes	NA	No	1	microtubule-based process [GO:0007017]	3	GTPase activity [GO:0003924];structural constituent of cytoskeleton [GO:0005200];GTP binding [GO:0005525]	3	nucleus [GO:0005634];cytoplasm [GO:0005737];microtubule [GO:0005874]
P62807	Q16777	Histone H2B type 1-C/E/F/G/I (Histone H2B.1 A) (Histone H2B.a) (H2B/a) (Histone H2B.g) (H2B/g) (Histone H2B.h) (H2B/h) (Histone H2B.k) (H2B/k) (Histone H2B.l) (H2B/l)	Histone H2A type 2-C (Histone H2A-GL101) (Histone H2A/q)	0.43	1144	922	793	0	no	27	24	R-HSA-5617472;R-HSA-73777;R-HSA-606279;R-HSA-3214847;R-HSA-977225;R-HSA-427413;R-HSA-171306;R-HSA-5625886;R-HSA-5334118;R-HSA-5578749;R-HSA-2559586;R-HSA-912446;R-HSA-3214815;R-HSA-201722;R-HSA-1221632;R-HSA-2559582;R-HSA-212300;R-HSA-2559580;R-HSA-73728;R-HSA-427359;R-HSA-2299718;R-HSA-427389;R-HSA-5250924	23	0	No	NA	No	0	NF	1	DNA binding [GO:0003677]	3	nucleus [GO:0005634];nucleosome [GO:0000786];extracellular exosome [GO:0070062]
P06733	Q9BYX7	Alpha-enolase (EC 4.2.1.11) (2-phospho-D-glycerate hydro-lyase) (C-myc promoter-binding protein) (Enolase 1) (MBP-1) (MPB-1) (Non-neural enolase) (NNE) (Phosphopyruvate hydratase) (Plasminogen-binding protein)	Putative beta-actin-like protein 3 (Kappa-actin) (POTE ankyrin domain family member K)	0.42	1341	1687	1256	0	NA	2	1	NF	0	NA	NA	NA	No	0	NF	0	NF	2	cytosol [GO:0005829];extracellular exosome [GO:0070062]
P60174	P31946	Triosephosphate isomerase (TIM) (EC 5.3.1.1) (Triose-phosphate isomerase)	14-3-3 protein beta/alpha (Protein 1054) (Protein kinase C inhibitor protein 1) (KCIP-1) [Cleaved into: 14-3-3 protein beta/alpha, N-terminally processed]	0.42	964	862	696	0	no	2	16	NF	0	0	No	NA	No	0	NF	0	NF	3	nucleus [GO:0005634];cytosol [GO:0005829];extracellular exosome [GO:0070062]
O95678	Q7Z3Y8	Keratin, type II cytoskeletal 75 (Cytokeratin-75) (CK-75) (Keratin-6 hair follicle) (hK6hf) (Keratin-75) (K75) (Type II keratin-K6hf) (Type-II keratin Kb18)	Keratin, type I cytoskeletal 27 (Cytokeratin-27) (CK-27) (Keratin-25C) (K25C) (Keratin-27) (K27) (Type I inner root sheath-specific keratin-K25irs3)	0.42	819	556	468	0	no	0	0	NF	0	0	No	NA	No	0	NF	1	structural molecule activity [GO:0005198]	2	intermediate filament [GO:0005882];extracellular exosome [GO:0070062]
P04908	Q5QNW6	Histone H2A type 1-B/E (Histone H2A.2) (Histone H2A/a) (Histone H2A/m)	Histone H2B type 2-F	0.42	917	1144	787	0	no	24	2	R-HSA-3214815;R-HSA-3214847	2	0	No	NA	No	0	NF	1	DNA binding [GO:0003677]	2	nucleus [GO:0005634];extracellular exosome [GO:0070062]
Q13748	P06576	Tubulin alpha-3C/D chain (Alpha-tubulin 2) (Alpha-tubulin 3C/D) (Tubulin alpha-2 chain)	ATP synthase subunit beta, mitochondrial (EC 3.6.3.14)	0.42	1599	1229	1132	0	no	22	3	NF	0	0	No	NA	No	0	NF	0	NF	1	nucleus [GO:0005634]
O60814	P04908	Histone H2B type 1-K (H2B K) (HIRA-interacting protein 1)	Histone H2A type 1-B/E (Histone H2A.2) (Histone H2A/a) (Histone H2A/m)	0.42	1143	917	787	0	no	27	24	R-HSA-5617472;R-HSA-73777;R-HSA-606279;R-HSA-3214847;R-HSA-977225;R-HSA-427413;R-HSA-171306;R-HSA-5625886;R-HSA-5334118;R-HSA-5578749;R-HSA-2559586;R-HSA-912446;R-HSA-3214815;R-HSA-201722;R-HSA-1221632;R-HSA-2559582;R-HSA-212300;R-HSA-2559580;R-HSA-73728;R-HSA-427359;R-HSA-2299718;R-HSA-427389;R-HSA-5250924	23	0	No	NA	No	0	NF	1	DNA binding [GO:0003677]	1	nucleus [GO:0005634]
P57053	Q8IUE6	Histone H2B type F-S (Histone H2B.s) (H2B/s)	Histone H2A type 2-B	0.42	1142	852	733	0	no	25	3	NF	0	0	No	NA	No	0	NF	1	DNA binding [GO:0003677]	1	nucleus [GO:0005634]
Q13509	P06576	Tubulin beta-3 chain (Tubulin beta-4 chain) (Tubulin beta-III)	ATP synthase subunit beta, mitochondrial (EC 3.6.3.14)	0.42	1390	1229	1052	0	no	22	3	NF	0	0	No	NA	No	0	NF	0	NF	2	nucleus [GO:0005634];extracellular exosome [GO:0070062]
P40227	P50990	T-complex protein 1 subunit zeta (TCP-1-zeta) (Acute morphine dependence-related protein 2) (CCT-zeta-1) (HTR3) (Tcp20)	T-complex protein 1 subunit theta (TCP-1-theta) (CCT-theta) (Renal carcinoma antigen NY-REN-15)	0.42	796	837	567	0	yes	5	6	R-HSA-389957;R-HSA-6814122;R-HSA-390471;R-HSA-389960;R-HSA-390450	5	0	No	NA	No	6	positive regulation of protein localization to Cajal body [GO:1904871];protein folding [GO:0006457];positive regulation of telomere maintenance via telomerase [GO:0032212];positive regulation of establishment of protein localization to telomere [GO:1904851];positive regulation of telomerase RNA localization to Cajal body [GO:1904874];protein stabilization [GO:0050821]	1	ATP binding [GO:0005524]	5	microtubule [GO:0005874];chaperonin-containing T-complex [GO:0005832];cytoplasm [GO:0005737];cytosol [GO:0005829];extracellular exosome [GO:0070062]
P07355	P04406	Annexin A2 (Annexin II) (Annexin-2) (Calpactin I heavy chain) (Calpactin-1 heavy chain) (Chromobindin-8) (Lipocortin II) (Placental anticoagulant protein IV) (PAP-IV) (Protein I) (p36)	Glyceraldehyde-3-phosphate dehydrogenase (GAPDH) (EC 1.2.1.12) (Peptidyl-cysteine S-nitrosylase GAPDH) (EC 2.6.99.-)	0.42	1101	1248	923	0	no	2	2	NF	0	0	No	NA	No	0	NF	0	NF	8	cytosol [GO:0005829];vesicle [GO:0031982];plasma membrane [GO:0005886];lipid particle [GO:0005811];membrane [GO:0016020];nucleus [GO:0005634];perinuclear region of cytoplasm [GO:0048471];extracellular exosome [GO:0070062]
Q14315	P35749	Filamin-C (FLN-C) (FLNc) (ABP-280-like protein) (ABP-L) (Actin-binding-like protein) (Filamin-2) (Gamma-filamin)	Myosin-11 (Myosin heavy chain 11) (Myosin heavy chain, smooth muscle isoform) (SMMHC)	0.42	1202	1293	972	0	no	1	7	NF	0	0	No	NA	No	0	NF	0	NF	1	cytosol [GO:0005829]
P60709	P68363	Actin, cytoplasmic 1 (Beta-actin) [Cleaved into: Actin, cytoplasmic 1, N-terminally processed]	Tubulin alpha-1B chain (Alpha-tubulin ubiquitous) (Tubulin K-alpha-1) (Tubulin alpha-ubiquitous chain)	0.42	1790	1662	1638	0	NA	21	21	R-HSA-1445148;R-HSA-437239;R-HSA-5663220;R-HSA-5626467	4	0	No	NF	No	0	NF	1	structural constituent of cytoskeleton [GO:0005200]	1	extracellular exosome [GO:0070062]
Q7L7L0	Q99879	Histone H2A type 3	Histone H2B type 1-M (Histone H2B.e) (H2B/e)	0.42	917	1139	783	0	no	3	27	R-HSA-3214815;R-HSA-3214847	2	0	No	NA	No	0	NF	1	DNA binding [GO:0003677]	2	nuclear nucleosome [GO:0000788];extracellular exosome [GO:0070062]
Q7L7L0	Q99877	Histone H2A type 3	Histone H2B type 1-N (Histone H2B.d) (H2B/d)	0.42	917	1140	783	0	no	3	27	R-HSA-3214815;R-HSA-3214847	2	0	No	NA	No	0	NF	1	DNA binding [GO:0003677]	2	nuclear nucleosome [GO:0000788];extracellular exosome [GO:0070062]
Q93079	Q8IUE6	Histone H2B type 1-H (Histone H2B.j) (H2B/j)	Histone H2A type 2-B	0.42	1144	852	731	0	no	27	3	R-HSA-3214847;R-HSA-3214815	2	0	No	NA	No	0	NF	1	DNA binding [GO:0003677]	3	nucleus [GO:0005634];nucleosome [GO:0000786];extracellular exosome [GO:0070062]
Q13509	Q5VTE0	Tubulin beta-3 chain (Tubulin beta-4 chain) (Tubulin beta-III)	Putative elongation factor 1-alpha-like 3 (EF-1-alpha-like 3) (Eukaryotic elongation factor 1 A-like 3) (eEF1A-like 3) (Eukaryotic translation elongation factor 1 alpha-1 pseudogene 5)	0.42	1390	1465	1209	0	no	22	1	NF	0	NA	NA	NA	No	0	NF	2	GTPase activity [GO:0003924];GTP binding [GO:0005525]	3	nucleus [GO:0005634];cytoplasm [GO:0005737];extracellular exosome [GO:0070062]
P62979	Q9BYX7	Ubiquitin-40S ribosomal protein S27a (Ubiquitin carboxyl extension protein 80) [Cleaved into: Ubiquitin; 40S ribosomal protein S27a]	Putative beta-actin-like protein 3 (Kappa-actin) (POTE ankyrin domain family member K)	0.42	1435	1687	1360	0	NA	153	1	NF	0	NA	NA	NA	Yes	0	NF	0	NF	2	cytosol [GO:0005829];extracellular exosome [GO:0070062]
P04431	P01598	Ig kappa chain V-I region Walker	Ig kappa chain V-I region EU	0.42	81	81	48	0	no	14	14	R-HSA-2871796;R-HSA-2730905;R-HSA-166663;R-HSA-173623;R-HSA-2871837;R-HSA-2168880;R-HSA-2454202;R-HSA-2029485;R-HSA-5690714;R-HSA-2871809;R-HSA-198933;R-HSA-2029481;R-HSA-983695;R-HSA-2029482	14	NA	NA	NA	No	0	NA	0	NA	0	NA
Q9Y277	P12236	Voltage-dependent anion-selective channel protein 3 (VDAC-3) (hVDAC3) (Outer mitochondrial membrane protein porin 3)	ADP/ATP translocase 3 (ADP,ATP carrier protein 3) (ADP,ATP carrier protein, isoform T2) (ANT 2) (Adenine nucleotide translocator 3) (ANT 3) (Solute carrier family 25 member 6) [Cleaved into: ADP/ATP translocase 3, N-terminally processed]	0.42	684	858	500	0	no	0	4	NF	0	0	No	NA	No	0	NF	0	NF	2	nucleus [GO:0005634];mitochondrion [GO:0005739]
P01597	P01598	Ig kappa chain V-I region DEE	Ig kappa chain V-I region EU	0.42	80	81	47	0	no	14	14	R-HSA-2871796;R-HSA-2730905;R-HSA-166663;R-HSA-173623;R-HSA-2871837;R-HSA-2168880;R-HSA-2454202;R-HSA-2029485;R-HSA-5690714;R-HSA-2871809;R-HSA-198933;R-HSA-2029481;R-HSA-983695;R-HSA-2029482	14	NA	NA	NA	No	0	NA	0	NA	0	NA
Q8N257	Q8IUE6	Histone H2B type 3-B (H2B type 12)	Histone H2A type 2-B	0.42	1134	852	728	0	no	27	3	R-HSA-3214847;R-HSA-3214815	2	0	No	NA	No	0	NF	1	DNA binding [GO:0003677]	1	nucleus [GO:0005634]
Q14683	Q92878	Structural maintenance of chromosomes protein 1A (SMC protein 1A) (SMC-1-alpha) (SMC-1A) (Sb1.8)	DNA repair protein RAD50 (hRAD50) (EC 3.6.-.-)	0.42	455	352	249	0	no	6	15	NF	0	0	No	NF	No	1	DNA repair [GO:0006281]	1	ATP binding [GO:0005524]	2	nucleoplasm [GO:0005654];condensed nuclear chromosome [GO:0000794]
Q9Y2P5	P10632	Bile acyl-CoA synthetase (BACS) (EC 6.2.1.7) (Bile acid-CoA ligase) (BA-CoA ligase) (BAL) (Cholate--CoA ligase) (Fatty acid transport protein 5) (FATP-5) (Fatty-acid-coenzyme A ligase, very long-chain 3) (Solute carrier family 27 member 5) (Very long-chain acyl-CoA synthetase homolog 2) (VLCS-H2) (VLCSH2) (Very long-chain acyl-CoA synthetase-related protein) (VLACS-related) (VLACSR)	Cytochrome P450 2C8 (EC 1.14.14.1) (CYPIIC8) (Cytochrome P450 IIC2) (Cytochrome P450 MP-12) (Cytochrome P450 MP-20) (Cytochrome P450 form 1) (S-mephenytoin 4-hydroxylase)	0.42	78	54	45	0	no	3	4	NF	0	0	No	NA	No	0	NF	0	NF	1	endoplasmic reticulum membrane [GO:0005789]
Q7L7L0	Q5QNW6	Histone H2A type 3	Histone H2B type 2-F	0.42	917	1144	787	0	no	3	2	R-HSA-3214815;R-HSA-3214847	2	0	No	NA	No	0	NF	1	DNA binding [GO:0003677]	2	nuclear nucleosome [GO:0000788];extracellular exosome [GO:0070062]
O60814	Q8IUE6	Histone H2B type 1-K (H2B K) (HIRA-interacting protein 1)	Histone H2A type 2-B	0.42	1143	852	733	0	no	27	3	R-HSA-3214847;R-HSA-3214815	2	0	No	NA	No	0	NF	1	DNA binding [GO:0003677]	1	nucleus [GO:0005634]
P15311	P52272	Ezrin (Cytovillin) (Villin-2) (p81)	Heterogeneous nuclear ribonucleoprotein M (hnRNP M)	0.42	1148	879	702	0	no	2	3	NF	0	0	No	NF	No	0	NF	2	poly(A) RNA binding [GO:0044822];protein domain specific binding [GO:0019904]	3	nucleolus [GO:0005730];extracellular exosome [GO:0070062];membrane [GO:0016020]
P14625	Q14697	Endoplasmin (94 kDa glucose-regulated protein) (GRP-94) (Heat shock protein 90 kDa beta member 1) (Tumor rejection antigen 1) (gp96 homolog)	Neutral alpha-glucosidase AB (EC 3.2.1.84) (Alpha-glucosidase 2) (Glucosidase II subunit alpha)	0.42	1266	1046	874	0	yes	3	2	NF	0	0	No	NA	No	0	NF	0	NF	5	endoplasmic reticulum lumen [GO:0005788];melanosome [GO:0042470];extracellular matrix [GO:0031012];extracellular exosome [GO:0070062];membrane [GO:0016020]
P29401	P04843	Transketolase (TK) (EC 2.2.1.1)	Dolichyl-diphosphooligosaccharide--protein glycosyltransferase subunit 1 (EC 2.4.99.18) (Dolichyl-diphosphooligosaccharide--protein glycosyltransferase 67 kDa subunit) (Ribophorin I) (RPN-I) (Ribophorin-1)	0.42	1052	865	692	0	no	2	2	NF	0	0	No	NA	No	0	NF	0	NF	0	NF
Q8NDW8	Q6ZP01	Tetratricopeptide repeat protein 21A (TPR repeat protein 21A) (Stress-inducible protein 2)	RNA-binding protein 44 (RNA-binding motif protein 44)	0.42	15	15	10	0	NA	0	0	NF	0	0	No	NA	No	0	NF	0	NF	0	NF
P45974	P55060	Ubiquitin carboxyl-terminal hydrolase 5 (EC 3.4.19.12) (Deubiquitinating enzyme 5) (Isopeptidase T) (Ubiquitin thioesterase 5) (Ubiquitin-specific-processing protease 5)	Exportin-2 (Exp2) (Cellular apoptosis susceptibility protein) (Chromosome segregation 1-like protein) (Importin-alpha re-exporter)	0.42	690	498	362	0	NA	0	0	NF	0	0	No	NA	No	0	NF	0	NF	0	NF
P04908	Q99879	Histone H2A type 1-B/E (Histone H2A.2) (Histone H2A/a) (Histone H2A/m)	Histone H2B type 1-M (Histone H2B.e) (H2B/e)	0.42	917	1139	783	0	no	24	27	R-HSA-5578749;R-HSA-5617472;R-HSA-912446;R-HSA-2559586;R-HSA-73777;R-HSA-3214815;R-HSA-201722;R-HSA-606279;R-HSA-1221632;R-HSA-2559582;R-HSA-3214847;R-HSA-212300;R-HSA-977225;R-HSA-427413;R-HSA-171306;R-HSA-2559580;R-HSA-73728;R-HSA-427359;R-HSA-5625886;R-HSA-2299718;R-HSA-427389;R-HSA-5250924;R-HSA-5334118	23	0	No	NA	No	0	NF	1	DNA binding [GO:0003677]	3	nucleus [GO:0005634];nucleosome [GO:0000786];extracellular exosome [GO:0070062]
P04908	Q99877	Histone H2A type 1-B/E (Histone H2A.2) (Histone H2A/a) (Histone H2A/m)	Histone H2B type 1-N (Histone H2B.d) (H2B/d)	0.42	917	1140	783	0	no	24	27	R-HSA-5578749;R-HSA-5617472;R-HSA-912446;R-HSA-2559586;R-HSA-73777;R-HSA-3214815;R-HSA-201722;R-HSA-606279;R-HSA-1221632;R-HSA-2559582;R-HSA-3214847;R-HSA-212300;R-HSA-977225;R-HSA-427413;R-HSA-171306;R-HSA-2559580;R-HSA-73728;R-HSA-427359;R-HSA-5625886;R-HSA-2299718;R-HSA-427389;R-HSA-5250924;R-HSA-5334118	23	0	No	NA	No	0	NF	1	DNA binding [GO:0003677]	3	nucleus [GO:0005634];nucleosome [GO:0000786];extracellular exosome [GO:0070062]
Q01082	P35580	Spectrin beta chain, non-erythrocytic 1 (Beta-II spectrin) (Fodrin beta chain) (Spectrin, non-erythroid beta chain 1)	Myosin-10 (Cellular myosin heavy chain, type B) (Myosin heavy chain 10) (Myosin heavy chain, non-muscle IIb) (Non-muscle myosin heavy chain B) (NMMHC-B) (Non-muscle myosin heavy chain IIb) (NMMHC II-b) (NMMHC-IIB)	0.42	1259	1311	1063	0	NA	5	6	NF	0	0	No	NA	No	2	mitotic cytokinesis [GO:0000281];axon guidance [GO:0007411]	1	actin binding [GO:0003779]	3	cytoplasm [GO:0005737];cytosol [GO:0005829];extracellular exosome [GO:0070062]
P08670	Q13748	Vimentin	Tubulin alpha-3C/D chain (Alpha-tubulin 2) (Alpha-tubulin 3C/D) (Tubulin alpha-2 chain)	0.42	1656	1599	1466	0	NA	2	22	NF	0	0	No	NA	No	0	NF	1	structural constituent of cytoskeleton [GO:0005200]	1	cytoplasm [GO:0005737]
P63261	P68363	Actin, cytoplasmic 2 (Gamma-actin) [Cleaved into: Actin, cytoplasmic 2, N-terminally processed]	Tubulin alpha-1B chain (Alpha-tubulin ubiquitous) (Tubulin K-alpha-1) (Tubulin alpha-ubiquitous chain)	0.42	1790	1662	1638	0	no	15	21	R-HSA-1445148;R-HSA-437239;R-HSA-5663220;R-HSA-5626467	4	0	No	NF	No	0	NF	2	ubiquitin protein ligase binding [GO:0031625];structural constituent of cytoskeleton [GO:0005200]	2	extracellular exosome [GO:0070062];myelin sheath [GO:0043209]
P01023	P55268	Alpha-2-macroglobulin (Alpha-2-M) (C3 and PZP-like alpha-2-macroglobulin domain-containing protein 5)	Laminin subunit beta-2 (Laminin B1s chain) (Laminin-11 subunit beta) (Laminin-14 subunit beta) (Laminin-15 subunit beta) (Laminin-3 subunit beta) (Laminin-4 subunit beta) (Laminin-7 subunit beta) (Laminin-9 subunit beta) (S-laminin subunit beta) (S-LAM beta)	0.42	837	712	574	0	no	5	3	NF	0	0	No	NF	No	0	NF	0	NF	2	extracellular region [GO:0005576];extracellular exosome [GO:0070062]
P12270	Q14980	Nucleoprotein TPR (Megator) (NPC-associated intranuclear protein) (Translocated promoter region protein)	Nuclear mitotic apparatus protein 1 (NuMA protein) (Nuclear matrix protein-22) (NMP-22) (SP-H antigen)	0.42	743	842	621	0	no	17	1	NF	0	0	No	NA	No	2	cell division [GO:0051301];mitotic nuclear division [GO:0007067]	0	NF	4	mitotic spindle [GO:0072686];nucleoplasm [GO:0005654];cytoplasm [GO:0005737];nucleus [GO:0005634]
P07437	P68371	Tubulin beta chain (Tubulin beta-5 chain)	Tubulin beta-4B chain (Tubulin beta-2 chain) (Tubulin beta-2C chain)	0.42	1132	843	687	0	yes	6	28	R-HSA-380284;R-HSA-380259;R-HSA-2565942;R-HSA-5620912;R-HSA-380270;R-HSA-8854518	6	0	yes	NA	No	4	movement of cell or subcellular component [GO:0006928];natural killer cell mediated cytotoxicity [GO:0042267];G2/M transition of mitotic cell cycle [GO:0000086];microtubule-based process [GO:0007017]	4	GTPase activity [GO:0003924];structural constituent of cytoskeleton [GO:0005200];MHC class I protein binding [GO:0042288];GTP binding [GO:0005525]	5	microtubule [GO:0005874];nucleus [GO:0005634];extracellular matrix [GO:0031012];cytoskeleton [GO:0005856];extracellular exosome [GO:0070062]
O43707	P14625	Alpha-actinin-4 (Non-muscle alpha-actinin 4)	Endoplasmin (94 kDa glucose-regulated protein) (GRP-94) (Heat shock protein 90 kDa beta member 1) (Tumor rejection antigen 1) (gp96 homolog)	0.42	1517	1266	1142	0	no	2	3	NF	0	0	No	NA	No	2	protein transport [GO:0015031];response to hypoxia [GO:0001666]	1	calcium ion binding [GO:0005509]	5	focal adhesion [GO:0005925];nucleus [GO:0005634];extracellular region [GO:0005576];extracellular exosome [GO:0070062];perinuclear region of cytoplasm [GO:0048471]
P05141	Q00325	ADP/ATP translocase 2 (ADP,ATP carrier protein 2) (ADP,ATP carrier protein, fibroblast isoform) (Adenine nucleotide translocator 2) (ANT 2) (Solute carrier family 25 member 5) [Cleaved into: ADP/ATP translocase 2, N-terminally processed]	Phosphate carrier protein, mitochondrial (Phosphate transport protein) (PTP) (Solute carrier family 25 member 3)	0.42	934	895	627	0	no	2	0	NF	0	0	No	NA	No	2	translation [GO:0006412];transport [GO:0006810]	1	structural constituent of ribosome [GO:0003735]	7	extracellular exosome [GO:0070062];mitochondrion [GO:0005739];integral component of plasma membrane [GO:0005887];myelin sheath [GO:0043209];membrane [GO:0016020];mitochondrial inner membrane [GO:0005743];nucleus [GO:0005634]
P0CG38	P04350	POTE ankyrin domain family member I	Tubulin beta-4A chain (Tubulin 5 beta) (Tubulin beta-4 chain)	0.42	1639	1415	1310	0	no	0	28	NF	0	0	No	NA	No	0	NF	0	NF	1	extracellular exosome [GO:0070062]
Q05707	P12109	Collagen alpha-1(XIV) chain (Undulin)	Collagen alpha-1(VI) chain	0.42	775	960	667	0	NA	2	7	R-HSA-1442490;R-HSA-1650814	2	0	No	NA	No	1	extracellular matrix organization [GO:0030198]	0	NF	3	endoplasmic reticulum lumen [GO:0005788];extracellular region [GO:0005576];extracellular exosome [GO:0070062]
P08238	P11021	Heat shock protein HSP 90-beta (HSP 90) (Heat shock 84 kDa) (HSP 84) (HSP84)	78 kDa glucose-regulated protein (GRP-78) (Endoplasmic reticulum lumenal Ca(2+)-binding protein grp78) (Heat shock 70 kDa protein 5) (Immunoglobulin heavy chain-binding protein) (BiP)	0.42	1514	1404	1285	0	yes	8	7	NF	0	0	No	2721_HCF-1 complex	No	1	cellular response to interleukin-4 [GO:0071353]	2	cadherin binding involved in cell-cell adhesion [GO:0098641];ATP binding [GO:0005524]	6	cell-cell adherens junction [GO:0005913];extracellular exosome [GO:0070062];mitochondrion [GO:0005739];cell surface [GO:0009986];membrane [GO:0016020];melanosome [GO:0042470]
P04908	Q93079	Histone H2A type 1-B/E (Histone H2A.2) (Histone H2A/a) (Histone H2A/m)	Histone H2B type 1-H (Histone H2B.j) (H2B/j)	0.42	917	1144	787	0	no	24	27	R-HSA-5578749;R-HSA-5617472;R-HSA-912446;R-HSA-2559586;R-HSA-73777;R-HSA-3214815;R-HSA-201722;R-HSA-606279;R-HSA-1221632;R-HSA-2559582;R-HSA-3214847;R-HSA-212300;R-HSA-977225;R-HSA-427413;R-HSA-171306;R-HSA-2559580;R-HSA-73728;R-HSA-427359;R-HSA-5625886;R-HSA-2299718;R-HSA-427389;R-HSA-5250924;R-HSA-5334118	23	0	No	NA	No	0	NF	1	DNA binding [GO:0003677]	3	nucleus [GO:0005634];nucleosome [GO:0000786];extracellular exosome [GO:0070062]
P62987	Q9BYX7	Ubiquitin-60S ribosomal protein L40 (CEP52) (Ubiquitin A-52 residue ribosomal protein fusion product 1) [Cleaved into: Ubiquitin; 60S ribosomal protein L40]	Putative beta-actin-like protein 3 (Kappa-actin) (POTE ankyrin domain family member K)	0.42	1429	1687	1354	0	NA	150	1	NF	0	NA	NA	NA	No	0	NF	0	NF	2	cytosol [GO:0005829];extracellular exosome [GO:0070062]
O60814	Q7L7L0	Histone H2B type 1-K (H2B K) (HIRA-interacting protein 1)	Histone H2A type 3	0.42	1143	917	787	0	no	27	3	R-HSA-3214847;R-HSA-3214815	2	0	No	NA	No	0	NF	1	DNA binding [GO:0003677]	1	nuclear nucleosome [GO:0000788]
P31946	P63104	14-3-3 protein beta/alpha (Protein 1054) (Protein kinase C inhibitor protein 1) (KCIP-1) [Cleaved into: 14-3-3 protein beta/alpha, N-terminally processed]	14-3-3 protein zeta/delta (Protein kinase C inhibitor protein 1) (KCIP-1)	0.42	655	927	550	1	NA	16	10	R-HSA-5628897;R-HSA-1445148;R-HSA-111447;R-HSA-392517;R-HSA-5625740;R-HSA-75035	6	0	yes	5919_BRAF-RAF1-14-3-3 complex;5199_Kinase maturation complex 1	No	4	regulation of mRNA stability [GO:0043488];membrane organization [GO:0061024];positive regulation of protein insertion into mitochondrial membrane involved in apoptotic signaling pathway [GO:1900740];protein targeting [GO:0006605]	1	cadherin binding involved in cell-cell adhesion [GO:0098641]	9	cell-cell adherens junction [GO:0005913];cytosol [GO:0005829];cytoplasm [GO:0005737];mitochondrion [GO:0005739];cytoplasmic vesicle membrane [GO:0030659];focal adhesion [GO:0005925];melanosome [GO:0042470];nucleus [GO:0005634];extracellular exosome [GO:0070062]
P30101	P10809	Protein disulfide-isomerase A3 (EC 5.3.4.1) (58 kDa glucose-regulated protein) (58 kDa microsomal protein) (p58) (Disulfide isomerase ER-60) (Endoplasmic reticulum resident protein 57) (ER protein 57) (ERp57) (Endoplasmic reticulum resident protein 60) (ER protein 60) (ERp60)	60 kDa heat shock protein, mitochondrial (60 kDa chaperonin) (Chaperonin 60) (CPN60) (Heat shock protein 60) (HSP-60) (Hsp60) (HuCHA60) (Mitochondrial matrix protein P1) (P60 lymphocyte protein)	0.42	1086	1122	890	0	yes	3	1	NF	0	0	No	NF	No	0	NF	1	poly(A) RNA binding [GO:0044822]	2	extracellular exosome [GO:0070062];cell surface [GO:0009986]
P24752	P42765	Acetyl-CoA acetyltransferase, mitochondrial (EC 2.3.1.9) (Acetoacetyl-CoA thiolase) (T2)	3-ketoacyl-CoA thiolase, mitochondrial (EC 2.3.1.16) (Acetyl-CoA acyltransferase) (Beta-ketothiolase) (Mitochondrial 3-oxoacyl-CoA thiolase) (T1)	0.42	659	629	409	0	yes	3	0	NF	0	0	yes	NA	No	0	NF	0	NF	3	mitochondrial inner membrane [GO:0005743];extracellular exosome [GO:0070062];mitochondrion [GO:0005739]
P08670	A5A3E0	Vimentin	POTE ankyrin domain family member F (ANKRD26-like family C member 1B) (Chimeric POTE-actin protein)	0.42	1656	1691	1528	0	NA	2	0	NF	0	0	No	NA	No	0	NF	0	NF	1	extracellular exosome [GO:0070062]
Q01082	O75369	Spectrin beta chain, non-erythrocytic 1 (Beta-II spectrin) (Fodrin beta chain) (Spectrin, non-erythroid beta chain 1)	Filamin-B (FLN-B) (ABP-278) (ABP-280 homolog) (Actin-binding-like protein) (Beta-filamin) (Filamin homolog 1) (Fh1) (Filamin-3) (Thyroid autoantigen) (Truncated actin-binding protein) (Truncated ABP)	0.42	1259	1341	1049	0	NA	5	1	NF	0	0	No	NA	No	0	NF	3	cadherin binding involved in cell-cell adhesion [GO:0098641];actin binding [GO:0003779];poly(A) RNA binding [GO:0044822]	4	cell-cell adherens junction [GO:0005913];cytoplasm [GO:0005737];cytosol [GO:0005829];extracellular exosome [GO:0070062]
P35241	P52272	Radixin	Heterogeneous nuclear ribonucleoprotein M (hnRNP M)	0.42	1127	879	698	0	no	1	3	NF	0	0	No	NA	No	0	NF	1	poly(A) RNA binding [GO:0044822]	1	extracellular exosome [GO:0070062]
Q13509	P68104	Tubulin beta-3 chain (Tubulin beta-4 chain) (Tubulin beta-III)	Elongation factor 1-alpha 1 (EF-1-alpha-1) (Elongation factor Tu) (EF-Tu) (Eukaryotic elongation factor 1 A-1) (eEF1A-1) (Leukocyte receptor cluster member 7)	0.42	1390	1467	1210	0	no	22	3	NF	0	0	No	NA	No	0	NF	2	GTPase activity [GO:0003924];GTP binding [GO:0005525]	3	nucleus [GO:0005634];cytoplasm [GO:0005737];extracellular exosome [GO:0070062]
Q9BQE3	P68133	Tubulin alpha-1C chain (Alpha-tubulin 6) (Tubulin alpha-6 chain)	Actin, alpha skeletal muscle (Alpha-actin-1)	0.42	1659	1747	1611	0	no	22	1	NF	0	0	No	NA	No	0	NF	1	structural constituent of cytoskeleton [GO:0005200]	0	NF
Q14032	Q16696	Bile acid-CoA:amino acid N-acyltransferase (BACAT) (BAT) (EC 2.3.1.65) (Glycine N-choloyltransferase) (Long-chain fatty-acyl-CoA hydrolase) (EC 3.1.2.2)	Cytochrome P450 2A13 (EC 1.14.14.1) (CYPIIA13)	0.42	64	58	45	0	no	2	4	NF	0	0	No	NA	No	0	NF	0	NF	0	NF
Q9BX66	Q9HBL0	Sorbin and SH3 domain-containing protein 1 (Ponsin) (SH3 domain protein 5) (SH3P12) (c-Cbl-associated protein) (CAP)	Tensin-1	0.42	523	658	404	0	NA	1	0	NF	0	0	No	NA	No	0	NF	0	NF	2	focal adhesion [GO:0005925];cytoplasm [GO:0005737]
P23527	Q8IUE6	Histone H2B type 1-O (Histone H2B.2) (Histone H2B.n) (H2B/n)	Histone H2A type 2-B	0.42	1141	852	731	0	no	27	3	R-HSA-3214847;R-HSA-3214815	2	0	No	NA	No	0	NF	1	DNA binding [GO:0003677]	2	nucleus [GO:0005634];nucleosome [GO:0000786]
P08319	P05089	Alcohol dehydrogenase 4 (EC 1.1.1.1) (Alcohol dehydrogenase class II pi chain)	Arginase-1 (EC 3.5.3.1) (Liver-type arginase) (Type I arginase)	0.42	128	142	83	0	no	2	1	NF	0	0	No	NA	No	0	NF	0	NF	1	cytosol [GO:0005829]
P04908	Q99880	Histone H2A type 1-B/E (Histone H2A.2) (Histone H2A/a) (Histone H2A/m)	Histone H2B type 1-L (Histone H2B.c) (H2B/c)	0.42	917	1138	782	0	no	24	27	R-HSA-5578749;R-HSA-5617472;R-HSA-912446;R-HSA-2559586;R-HSA-73777;R-HSA-3214815;R-HSA-201722;R-HSA-606279;R-HSA-1221632;R-HSA-2559582;R-HSA-3214847;R-HSA-212300;R-HSA-977225;R-HSA-427413;R-HSA-171306;R-HSA-2559580;R-HSA-73728;R-HSA-427359;R-HSA-5625886;R-HSA-2299718;R-HSA-427389;R-HSA-5250924;R-HSA-5334118	23	0	No	NA	No	0	NF	1	DNA binding [GO:0003677]	3	nucleus [GO:0005634];nucleosome [GO:0000786];extracellular exosome [GO:0070062]
Q7Z5P4	P05177	17-beta-hydroxysteroid dehydrogenase 13 (17-beta-HSD 13) (EC 1.1.-.-) (Short chain dehydrogenase/reductase family 16C member 3) (Short-chain dehydrogenase/reductase 9)	Cytochrome P450 1A2 (EC 1.14.14.1) (CYPIA2) (Cholesterol 25-hydroxylase) (Cytochrome P(3)450) (Cytochrome P450 4) (Cytochrome P450-P3)	0.42	69	54	34	0	no	0	5	NF	0	0	No	NA	No	0	NF	1	oxidoreductase activity [GO:0016491]	0	NF
P58876	Q8IUE6	Histone H2B type 1-D (HIRA-interacting protein 2) (Histone H2B.1 B) (Histone H2B.b) (H2B/b)	Histone H2A type 2-B	0.42	1139	852	728	0	no	27	3	R-HSA-3214847;R-HSA-3214815	2	0	No	NA	No	0	NF	1	DNA binding [GO:0003677]	2	nucleus [GO:0005634];extracellular exosome [GO:0070062]
Q6S8J3	P04406	POTE ankyrin domain family member E (ANKRD26-like family C member 1A) (Prostate, ovary, testis-expressed protein on chromosome 2) (POTE-2)	Glyceraldehyde-3-phosphate dehydrogenase (GAPDH) (EC 1.2.1.12) (Peptidyl-cysteine S-nitrosylase GAPDH) (EC 2.6.99.-)	0.42	1710	1248	1203	0	no	0	2	NF	0	0	No	NA	No	0	NF	0	NF	1	extracellular exosome [GO:0070062]
Q8IUE6	Q5QNW6	Histone H2A type 2-B	Histone H2B type 2-F	0.42	852	1144	731	0	no	3	2	R-HSA-3214815;R-HSA-3214847	2	0	No	NA	No	0	NF	1	DNA binding [GO:0003677]	2	nucleus [GO:0005634];extracellular exosome [GO:0070062]
P62805	Q16778	Histone H4	Histone H2B type 2-E (Histone H2B-GL105) (Histone H2B.q) (H2B/q)	0.42	1115	1143	923	0	no	30	27	R-HSA-5617472;R-HSA-73777;R-HSA-5693565;R-HSA-606279;R-HSA-3214847;R-HSA-977225;R-HSA-427413;R-HSA-171306;R-HSA-5693571;R-HSA-5625886;R-HSA-5334118;R-HSA-5578749;R-HSA-912446;R-HSA-2559586;R-HSA-3214815;R-HSA-69473;R-HSA-201722;R-HSA-1221632;R-HSA-2559582;R-HSA-212300;R-HSA-5693607;R-HSA-2559580;R-HSA-73728;R-HSA-427359;R-HSA-2299718;R-HSA-427389;R-HSA-5250924	27	0	No	NA	No	1	nucleosome assembly [GO:0006334]	1	DNA binding [GO:0003677]	4	nucleus [GO:0005634];nucleosome [GO:0000786];nucleoplasm [GO:0005654];extracellular exosome [GO:0070062]
P01861	P01860	Ig gamma-4 chain C region	Ig gamma-3 chain C region (HDC) (Heavy chain disease protein)	0.42	595	557	396	0	no	5	5	R-HSA-173623;R-HSA-2029485;R-HSA-2029481;R-HSA-166663;R-HSA-2029482	5	NA	NA	NA	No	9	phagocytosis, recognition [GO:0006910];complement activation, classical pathway [GO:0006958];innate immune response [GO:0045087];defense response to bacterium [GO:0042742];phagocytosis, engulfment [GO:0006911];B cell receptor signaling pathway [GO:0050853];Fc-gamma receptor signaling pathway involved in phagocytosis [GO:0038096];complement activation [GO:0006956];positive regulation of B cell act…	3	immunoglobulin receptor binding [GO:0034987];antigen binding [GO:0003823];serine-type endopeptidase activity [GO:0004252]	6	immunoglobulin complex, circulating [GO:0042571];extracellular exosome [GO:0070062];blood microparticle [GO:0072562];extracellular space [GO:0005615];external side of plasma membrane [GO:0009897];extracellular region [GO:0005576]
P04083	A6NMY6	Annexin A1 (Annexin I) (Annexin-1) (Calpactin II) (Calpactin-2) (Chromobindin-9) (Lipocortin I) (Phospholipase A2 inhibitory protein) (p35)	Putative annexin A2-like protein (Annexin A2 pseudogene 2) (Lipocortin II pseudogene)	0.42	843	1019	661	0	no	5	0	NF	0	NA	NA	NA	No	0	NF	2	calcium ion binding [GO:0005509];calcium-dependent phospholipid binding [GO:0005544]	1	extracellular exosome [GO:0070062]
P07900	O43707	Heat shock protein HSP 90-alpha (Heat shock 86 kDa) (HSP 86) (HSP86) (Lipopolysaccharide-associated protein 2) (LAP-2) (LPS-associated protein 2) (Renal carcinoma antigen NY-REN-38)	Alpha-actinin-4 (Non-muscle alpha-actinin 4)	0.42	1500	1517	1299	0	no	24	2	NF	0	0	No	NF	No	0	NF	2	protein homodimerization activity [GO:0042803];poly(A) RNA binding [GO:0044822]	7	extracellular exosome [GO:0070062];cytoplasm [GO:0005737];protein complex [GO:0043234];perinuclear region of cytoplasm [GO:0048471];nucleus [GO:0005634];extracellular region [GO:0005576];neuron projection [GO:0043005]
P62937	P68431	Peptidyl-prolyl cis-trans isomerase A (PPIase A) (EC 5.2.1.8) (Cyclophilin A) (Cyclosporin A-binding protein) (Rotamase A) [Cleaved into: Peptidyl-prolyl cis-trans isomerase A, N-terminally processed]	Histone H3.1 (Histone H3/a) (Histone H3/b) (Histone H3/c) (Histone H3/d) (Histone H3/f) (Histone H3/h) (Histone H3/i) (Histone H3/j) (Histone H3/k) (Histone H3/l)	0.42	816	831	582	0	NA	11	24	NF	0	0	No	NF	Yes	0	NF	0	NF	4	nucleus [GO:0005634];extracellular region [GO:0005576];extracellular exosome [GO:0070062];membrane [GO:0016020]
P01834	P0CG04	Ig kappa chain C region	Ig lambda-1 chain C regions	0.42	588	461	348	0	no	14	14	R-HSA-2871796;R-HSA-2730905;R-HSA-166663;R-HSA-173623;R-HSA-2871837;R-HSA-2168880;R-HSA-2454202;R-HSA-2029485;R-HSA-5690714;R-HSA-2871809;R-HSA-198933;R-HSA-2029481;R-HSA-983695;R-HSA-2029482	14	NA	NA	NA	No	13	regulation of immune response [GO:0050776];receptor-mediated endocytosis [GO:0006898];phagocytosis, recognition [GO:0006910];complement activation, classical pathway [GO:0006958];innate immune response [GO:0045087];defense response to bacterium [GO:0042742];Fc-epsilon receptor signaling pathway [GO:0038095];phagocytosis, engulfment [GO:0006911];B cell receptor signaling pathway [GO:0050853];Fc-ga…	3	immunoglobulin receptor binding [GO:0034987];antigen binding [GO:0003823];serine-type endopeptidase activity [GO:0004252]	7	immunoglobulin complex, circulating [GO:0042571];extracellular exosome [GO:0070062];blood microparticle [GO:0072562];extracellular space [GO:0005615];external side of plasma membrane [GO:0009897];extracellular region [GO:0005576];plasma membrane [GO:0005886]
P07814	Q14152	Bifunctional glutamate/proline--tRNA ligase (Bifunctional aminoacyl-tRNA synthetase) (Cell proliferation-inducing gene 32 protein) (Glutamatyl-prolyl-tRNA synthetase) [Includes: Glutamate--tRNA ligase (EC 6.1.1.17) (Glutamyl-tRNA synthetase) (GluRS); Proline--tRNA ligase (EC 6.1.1.15) (Prolyl-tRNA synthetase)]	Eukaryotic translation initiation factor 3 subunit A (eIF3a) (Eukaryotic translation initiation factor 3 subunit 10) (eIF-3-theta) (eIF3 p167) (eIF3 p180) (eIF3 p185)	0.42	650	647	424	0	NA	3	6	NF	0	0	No	NF	No	0	NF	0	NF	3	cytoplasm [GO:0005737];cytosol [GO:0005829];membrane [GO:0016020]
P13646	Q01546	Keratin, type I cytoskeletal 13 (Cytokeratin-13) (CK-13) (Keratin-13) (K13)	Keratin, type II cytoskeletal 2 oral (Cytokeratin-2P) (CK-2P) (K2P) (Keratin-76) (K76) (Type-II keratin Kb9)	0.42	690	689	485	0	no	0	0	NF	0	0	No	NA	No	1	cytoskeleton organization [GO:0007010]	1	structural molecule activity [GO:0005198]	3	nucleus [GO:0005634];keratin filament [GO:0045095];extracellular exosome [GO:0070062]
Q9BQE3	P60709	Tubulin alpha-1C chain (Alpha-tubulin 6) (Tubulin alpha-6 chain)	Actin, cytoplasmic 1 (Beta-actin) [Cleaved into: Actin, cytoplasmic 1, N-terminally processed]	0.42	1659	1790	1638	0	NA	22	21	R-HSA-1445148;R-HSA-437239;R-HSA-389957;R-HSA-5663220;R-HSA-5626467	5	0	No	NF	No	0	NF	1	structural constituent of cytoskeleton [GO:0005200]	1	cytoplasm [GO:0005737]
Q99877	Q8IUE6	Histone H2B type 1-N (Histone H2B.d) (H2B/d)	Histone H2A type 2-B	0.42	1140	852	729	0	no	27	3	R-HSA-3214847;R-HSA-3214815	2	0	No	NA	No	0	NF	1	DNA binding [GO:0003677]	3	nucleus [GO:0005634];nucleosome [GO:0000786];extracellular exosome [GO:0070062]
Q7L7L0	P58876	Histone H2A type 3	Histone H2B type 1-D (HIRA-interacting protein 2) (Histone H2B.1 B) (Histone H2B.b) (H2B/b)	0.42	917	1139	783	0	no	3	27	R-HSA-3214815;R-HSA-3214847	2	0	No	NA	No	0	NF	1	DNA binding [GO:0003677]	2	nuclear nucleosome [GO:0000788];extracellular exosome [GO:0070062]
Q9BQE3	P63261	Tubulin alpha-1C chain (Alpha-tubulin 6) (Tubulin alpha-6 chain)	Actin, cytoplasmic 2 (Gamma-actin) [Cleaved into: Actin, cytoplasmic 2, N-terminally processed]	0.42	1659	1790	1638	0	no	22	15	R-HSA-1445148;R-HSA-437239;R-HSA-5663220;R-HSA-5626467	4	0	No	NF	No	0	NF	1	structural constituent of cytoskeleton [GO:0005200]	1	nucleus [GO:0005634]
P62807	P04908	Histone H2B type 1-C/E/F/G/I (Histone H2B.1 A) (Histone H2B.a) (H2B/a) (Histone H2B.g) (H2B/g) (Histone H2B.h) (H2B/h) (Histone H2B.k) (H2B/k) (Histone H2B.l) (H2B/l)	Histone H2A type 1-B/E (Histone H2A.2) (Histone H2A/a) (Histone H2A/m)	0.42	1144	917	787	0	no	27	24	R-HSA-5617472;R-HSA-73777;R-HSA-606279;R-HSA-3214847;R-HSA-977225;R-HSA-427413;R-HSA-171306;R-HSA-5625886;R-HSA-5334118;R-HSA-5578749;R-HSA-2559586;R-HSA-912446;R-HSA-3214815;R-HSA-201722;R-HSA-1221632;R-HSA-2559582;R-HSA-212300;R-HSA-2559580;R-HSA-73728;R-HSA-427359;R-HSA-2299718;R-HSA-427389;R-HSA-5250924	23	0	No	NA	No	0	NF	1	DNA binding [GO:0003677]	3	nucleus [GO:0005634];nucleosome [GO:0000786];extracellular exosome [GO:0070062]
Q6S8J3	Q13885	POTE ankyrin domain family member E (ANKRD26-like family C member 1A) (Prostate, ovary, testis-expressed protein on chromosome 2) (POTE-2)	Tubulin beta-2A chain (Tubulin beta class IIa)	0.42	1710	1484	1418	0	no	0	22	NF	0	0	No	NA	No	0	NF	0	NF	1	extracellular exosome [GO:0070062]
Q15166	P05181	Serum paraoxonase/lactonase 3 (EC 3.1.1.2) (EC 3.1.1.81) (EC 3.1.8.1)	Cytochrome P450 2E1 (EC 1.14.13.-) (4-nitrophenol 2-hydroxylase) (EC 1.14.13.n7) (CYPIIE1) (Cytochrome P450-J) [Cleaved into: Cytochrome P450 2E1, N-terminally processed]	0.42	75	57	41	0	no	0	2	NF	0	0	No	NA	No	0	NF	0	NF	0	NF
Q6S8J3	P06733	POTE ankyrin domain family member E (ANKRD26-like family C member 1A) (Prostate, ovary, testis-expressed protein on chromosome 2) (POTE-2)	Alpha-enolase (EC 4.2.1.11) (2-phospho-D-glycerate hydro-lyase) (C-myc promoter-binding protein) (Enolase 1) (MBP-1) (MPB-1) (Non-neural enolase) (NNE) (Phosphopyruvate hydratase) (Plasminogen-binding protein)	0.42	1710	1341	1272	0	NA	0	2	NF	0	0	No	NA	No	0	NF	0	NF	2	extracellular space [GO:0005615];extracellular exosome [GO:0070062]
P13647	P35527	Keratin, type II cytoskeletal 5 (58 kDa cytokeratin) (Cytokeratin-5) (CK-5) (Keratin-5) (K5) (Type-II keratin Kb5)	Keratin, type I cytoskeletal 9 (Cytokeratin-9) (CK-9) (Keratin-9) (K9)	0.42	897	747	587	0	no	1	0	NF	0	0	No	NA	Yes	1	epidermis development [GO:0008544]	1	structural constituent of cytoskeleton [GO:0005200]	4	intermediate filament [GO:0005882];nucleus [GO:0005634];extracellular exosome [GO:0070062];membrane [GO:0016020]
P0CG47	Q9BYX7	Polyubiquitin-B [Cleaved into: Ubiquitin]	Putative beta-actin-like protein 3 (Kappa-actin) (POTE ankyrin domain family member K)	0.42	1428	1687	1353	0	NA	139	1	NF	0	NA	NA	NA	No	0	NF	0	NF	2	cytosol [GO:0005829];extracellular exosome [GO:0070062]
Q9BUF5	Q13748	Tubulin beta-6 chain (Tubulin beta class V)	Tubulin alpha-3C/D chain (Alpha-tubulin 2) (Alpha-tubulin 3C/D) (Tubulin alpha-2 chain)	0.42	1253	1599	1194	0	no	22	22	R-HSA-68877;R-HSA-190861;R-HSA-5610787;R-HSA-2467813;R-HSA-6807878;R-HSA-983189;R-HSA-190840;R-HSA-1445148;R-HSA-5617833;R-HSA-437239;R-HSA-380320;R-HSA-389960;R-HSA-5620924;R-HSA-6811436;R-HSA-389957;R-HSA-6811434;R-HSA-389977;R-HSA-2500257;R-HSA-5663220;R-HSA-2132295;R-HSA-8852276;R-HSA-5626467	22	0	No	NA	No	1	microtubule-based process [GO:0007017]	3	GTPase activity [GO:0003924];structural constituent of cytoskeleton [GO:0005200];GTP binding [GO:0005525]	3	nucleus [GO:0005634];cytoplasm [GO:0005737];microtubule [GO:0005874]
O75452	P33261	Retinol dehydrogenase 16 (EC 1.1.-.-) (Microsomal NAD(+)-dependent retinol dehydrogenase 4) (RoDH-4) (Short chain dehydrogenase/reductase family 9C member 8) (Sterol/retinol dehydrogenase)	Cytochrome P450 2C19 (EC 1.14.13.-) ((R)-limonene 6-monooxygenase) (EC 1.14.13.80) ((S)-limonene 6-monooxygenase) (EC 1.14.13.48) ((S)-limonene 7-monooxygenase) (EC 1.14.13.49) (CYPIIC17) (CYPIIC19) (Cytochrome P450-11A) (Cytochrome P450-254C) (Mephenytoin 4-hydroxylase)	0.42	54	57	39	0	no	2	4	NF	0	0	No	NA	No	0	NF	0	NF	3	organelle membrane [GO:0031090];intracellular membrane-bounded organelle [GO:0043231];endoplasmic reticulum membrane [GO:0005789]
P20853	P05177	Cytochrome P450 2A7 (EC 1.14.14.1) (CYPIIA7) (Cytochrome P450 IIA4)	Cytochrome P450 1A2 (EC 1.14.14.1) (CYPIA2) (Cholesterol 25-hydroxylase) (Cytochrome P(3)450) (Cytochrome P450 4) (Cytochrome P450-P3)	0.42	47	54	39	0	no	3	5	NF	0	0	No	NA	No	1	epoxygenase P450 pathway [GO:0019373]	4	heme binding [GO:0020037];iron ion binding [GO:0005506];oxygen binding [GO:0019825];aromatase activity [GO:0070330]	2	organelle membrane [GO:0031090];endoplasmic reticulum membrane [GO:0005789]
P06576	P68104	ATP synthase subunit beta, mitochondrial (EC 3.6.3.14)	Elongation factor 1-alpha 1 (EF-1-alpha-1) (Elongation factor Tu) (EF-Tu) (Eukaryotic elongation factor 1 A-1) (eEF1A-1) (Leukocyte receptor cluster member 7)	0.42	1229	1467	1081	0	yes	3	3	NF	0	0	No	NF	No	0	NF	0	NF	3	nucleus [GO:0005634];extracellular exosome [GO:0070062];membrane [GO:0016020]
Q99623	P40926	Prohibitin-2 (B-cell receptor-associated protein BAP37) (D-prohibitin) (Repressor of estrogen receptor activity)	Malate dehydrogenase, mitochondrial (EC 1.1.1.37)	0.42	667	928	553	0	no	0	2	NF	0	0	No	NA	No	0	NF	0	NF	4	mitochondrial inner membrane [GO:0005743];nucleus [GO:0005634];extracellular exosome [GO:0070062];mitochondrion [GO:0005739]
P62807	Q8IUE6	Histone H2B type 1-C/E/F/G/I (Histone H2B.1 A) (Histone H2B.a) (H2B/a) (Histone H2B.g) (H2B/g) (Histone H2B.h) (H2B/h) (Histone H2B.k) (H2B/k) (Histone H2B.l) (H2B/l)	Histone H2A type 2-B	0.42	1144	852	733	0	no	27	3	R-HSA-3214847;R-HSA-3214815	2	0	No	NA	No	0	NF	1	DNA binding [GO:0003677]	3	nucleus [GO:0005634];nucleosome [GO:0000786];extracellular exosome [GO:0070062]
Q71DI3	P62937	Histone H3.2 (Histone H3/m) (Histone H3/o)	Peptidyl-prolyl cis-trans isomerase A (PPIase A) (EC 5.2.1.8) (Cyclophilin A) (Cyclosporin A-binding protein) (Rotamase A) [Cleaved into: Peptidyl-prolyl cis-trans isomerase A, N-terminally processed]	0.42	831	816	582	0	NA	24	11	NF	0	0	No	NF	Yes	0	NF	0	NF	3	nucleus [GO:0005634];extracellular region [GO:0005576];extracellular exosome [GO:0070062]
Q7L7L0	Q93079	Histone H2A type 3	Histone H2B type 1-H (Histone H2B.j) (H2B/j)	0.42	917	1144	787	0	no	3	27	R-HSA-3214815;R-HSA-3214847	2	0	No	NA	No	0	NF	1	DNA binding [GO:0003677]	2	nuclear nucleosome [GO:0000788];extracellular exosome [GO:0070062]
Q06830	Q9H0U4	Peroxiredoxin-1 (EC 1.11.1.15) (Natural killer cell-enhancing factor A) (NKEF-A) (Proliferation-associated gene protein) (PAG) (Thioredoxin peroxidase 2) (Thioredoxin-dependent peroxide reductase 2)	Ras-related protein Rab-1B	0.42	961	784	595	0	no	2	4	NF	0	0	No	NA	Yes	0	NF	0	NF	2	extracellular exosome [GO:0070062];mitochondrion [GO:0005739]
Q6S8J3	Q9BVA1	POTE ankyrin domain family member E (ANKRD26-like family C member 1A) (Prostate, ovary, testis-expressed protein on chromosome 2) (POTE-2)	Tubulin beta-2B chain	0.42	1710	1478	1413	0	no	0	22	NF	0	0	No	NA	No	0	NF	0	NF	0	NF
P0CG39	Q9NY65	POTE ankyrin domain family member J	Tubulin alpha-8 chain (Alpha-tubulin 8) (Tubulin alpha chain-like 2)	0.42	1552	1528	1335	0	no	0	19	NF	0	0	No	NA	No	0	NF	0	NF	0	NF
P26038	P54652	Moesin (Membrane-organizing extension spike protein)	Heat shock-related 70 kDa protein 2 (Heat shock 70 kDa protein 2)	0.42	1242	1349	1033	0	no	1	3	NF	0	0	No	NA	No	0	NF	0	NF	4	nucleus [GO:0005634];extracellular exosome [GO:0070062];blood microparticle [GO:0072562];myelin sheath [GO:0043209]
P11142	P68104	Heat shock cognate 71 kDa protein (Heat shock 70 kDa protein 8) (Lipopolysaccharide-associated protein 1) (LAP-1) (LPS-associated protein 1)	Elongation factor 1-alpha 1 (EF-1-alpha-1) (Elongation factor Tu) (EF-Tu) (Eukaryotic elongation factor 1 A-1) (eEF1A-1) (Leukocyte receptor cluster member 7)	0.42	1434	1467	1256	0	yes	9	3	NF	0	0	No	NF	No	1	transcription, DNA-templated [GO:0006351]	1	poly(A) RNA binding [GO:0044822]	6	cytosol [GO:0005829];nucleolus [GO:0005730];extracellular space [GO:0005615];membrane [GO:0016020];nucleus [GO:0005634];extracellular exosome [GO:0070062]
Q05639	P04350	Elongation factor 1-alpha 2 (EF-1-alpha-2) (Eukaryotic elongation factor 1 A-2) (eEF1A-2) (Statin-S1)	Tubulin beta-4A chain (Tubulin 5 beta) (Tubulin beta-4 chain)	0.42	1397	1415	1175	0	no	1	28	NF	0	0	No	NA	No	0	NF	2	GTPase activity [GO:0003924];GTP binding [GO:0005525]	2	myelin sheath [GO:0043209];neuronal cell body [GO:0043025]
P04406	A5A3E0	Glyceraldehyde-3-phosphate dehydrogenase (GAPDH) (EC 1.2.1.12) (Peptidyl-cysteine S-nitrosylase GAPDH) (EC 2.6.99.-)	POTE ankyrin domain family member F (ANKRD26-like family C member 1B) (Chimeric POTE-actin protein)	0.42	1248	1691	1193	0	no	2	0	NF	0	0	No	NA	No	0	NF	0	NF	1	extracellular exosome [GO:0070062]
P04908	P58876	Histone H2A type 1-B/E (Histone H2A.2) (Histone H2A/a) (Histone H2A/m)	Histone H2B type 1-D (HIRA-interacting protein 2) (Histone H2B.1 B) (Histone H2B.b) (H2B/b)	0.42	917	1139	783	0	no	24	27	R-HSA-5578749;R-HSA-5617472;R-HSA-912446;R-HSA-2559586;R-HSA-73777;R-HSA-3214815;R-HSA-201722;R-HSA-606279;R-HSA-1221632;R-HSA-2559582;R-HSA-3214847;R-HSA-212300;R-HSA-977225;R-HSA-427413;R-HSA-171306;R-HSA-2559580;R-HSA-73728;R-HSA-427359;R-HSA-5625886;R-HSA-2299718;R-HSA-427389;R-HSA-5250924;R-HSA-5334118	23	0	No	NA	No	0	NF	1	DNA binding [GO:0003677]	2	nucleus [GO:0005634];extracellular exosome [GO:0070062]
P84243	P62937	Histone H3.3	Peptidyl-prolyl cis-trans isomerase A (PPIase A) (EC 5.2.1.8) (Cyclophilin A) (Cyclosporin A-binding protein) (Rotamase A) [Cleaved into: Peptidyl-prolyl cis-trans isomerase A, N-terminally processed]	0.42	830	816	582	0	NA	18	11	NF	0	0	No	NF	Yes	0	NF	0	NF	3	nucleus [GO:0005634];extracellular region [GO:0005576];extracellular exosome [GO:0070062]
P33261	Q9H2A2	Cytochrome P450 2C19 (EC 1.14.13.-) ((R)-limonene 6-monooxygenase) (EC 1.14.13.80) ((S)-limonene 6-monooxygenase) (EC 1.14.13.48) ((S)-limonene 7-monooxygenase) (EC 1.14.13.49) (CYPIIC17) (CYPIIC19) (Cytochrome P450-11A) (Cytochrome P450-254C) (Mephenytoin 4-hydroxylase)	Aldehyde dehydrogenase family 8 member A1 (EC 1.2.1.-) (Aldehyde dehydrogenase 12)	0.42	57	70	45	0	no	4	1	NF	0	0	No	NA	No	0	NF	0	NF	0	NF
P11142	Q5VTE0	Heat shock cognate 71 kDa protein (Heat shock 70 kDa protein 8) (Lipopolysaccharide-associated protein 1) (LAP-1) (LPS-associated protein 1)	Putative elongation factor 1-alpha-like 3 (EF-1-alpha-like 3) (Eukaryotic elongation factor 1 A-like 3) (eEF1A-like 3) (Eukaryotic translation elongation factor 1 alpha-1 pseudogene 5)	0.42	1434	1465	1255	0	no	9	1	NF	0	NA	NA	NA	No	0	NF	0	NF	3	nucleus [GO:0005634];extracellular space [GO:0005615];extracellular exosome [GO:0070062]
P55786	Q8WUM4	Puromycin-sensitive aminopeptidase (PSA) (EC 3.4.11.14) (Cytosol alanyl aminopeptidase) (AAP-S)	Programmed cell death 6-interacting protein (PDCD6-interacting protein) (ALG-2-interacting protein 1) (ALG-2-interacting protein X) (Hp95)	0.42	757	775	531	0	no	1	2	NF	0	0	No	NA	No	0	NF	0	NF	2	cytosol [GO:0005829];extracellular exosome [GO:0070062]
Q6PEY2	P06733	Tubulin alpha-3E chain (Alpha-tubulin 3E)	Alpha-enolase (EC 4.2.1.11) (2-phospho-D-glycerate hydro-lyase) (C-myc promoter-binding protein) (Enolase 1) (MBP-1) (MPB-1) (Non-neural enolase) (NNE) (Phosphopyruvate hydratase) (Plasminogen-binding protein)	0.42	1579	1341	1212	0	NA	19	2	NF	0	0	No	NA	No	0	NF	0	NF	2	nucleus [GO:0005634];cytoplasm [GO:0005737]
Q96I99	P42765	Succinyl-CoA ligase [GDP-forming] subunit beta, mitochondrial (EC 6.2.1.4) (GTP-specific succinyl-CoA synthetase subunit beta) (Succinyl-CoA synthetase beta-G chain) (SCS-betaG)	3-ketoacyl-CoA thiolase, mitochondrial (EC 2.3.1.16) (Acetyl-CoA acyltransferase) (Beta-ketothiolase) (Mitochondrial 3-oxoacyl-CoA thiolase) (T1)	0.42	571	629	401	0	no	1	0	NF	0	0	No	NA	No	0	NF	0	NF	1	mitochondrion [GO:0005739]
Q7Z3Z0	Q2M2I5	Keratin, type I cytoskeletal 25 (Cytokeratin-25) (CK-25) (Keratin-25) (K25) (Keratin-25A) (K25A) (Type I inner root sheath-specific keratin-K25irs1)	Keratin, type I cytoskeletal 24 (Cytokeratin-24) (CK-24) (Keratin-24) (K24) (Type I keratin-24)	0.42	377	447	277	0	no	0	0	NF	0	0	yes	NA	No	0	NF	1	structural molecule activity [GO:0005198]	3	intermediate filament [GO:0005882];cytoplasm [GO:0005737];extracellular exosome [GO:0070062]
P68363	P68133	Tubulin alpha-1B chain (Alpha-tubulin ubiquitous) (Tubulin K-alpha-1) (Tubulin alpha-ubiquitous chain)	Actin, alpha skeletal muscle (Alpha-actin-1)	0.42	1662	1747	1611	0	no	21	1	NF	0	0	No	NA	No	0	NF	1	structural constituent of cytoskeleton [GO:0005200]	1	extracellular exosome [GO:0070062]
P06899	Q8IUE6	Histone H2B type 1-J (Histone H2B.1) (Histone H2B.r) (H2B/r)	Histone H2A type 2-B	0.42	1142	852	735	0	no	27	3	R-HSA-3214847;R-HSA-3214815	2	0	No	NA	No	0	NF	1	DNA binding [GO:0003677]	2	nucleus [GO:0005634];nucleosome [GO:0000786]
P0CG48	Q9BYX7	Polyubiquitin-C [Cleaved into: Ubiquitin]	Putative beta-actin-like protein 3 (Kappa-actin) (POTE ankyrin domain family member K)	0.42	1428	1687	1353	0	NA	139	1	NF	0	NA	NA	NA	No	0	NF	0	NF	2	cytosol [GO:0005829];extracellular exosome [GO:0070062]
P04350	A5A3E0	Tubulin beta-4A chain (Tubulin 5 beta) (Tubulin beta-4 chain)	POTE ankyrin domain family member F (ANKRD26-like family C member 1B) (Chimeric POTE-actin protein)	0.42	1415	1691	1349	0	no	28	0	NF	0	0	No	NA	No	0	NF	0	NF	1	extracellular exosome [GO:0070062]
P62807	Q7L7L0	Histone H2B type 1-C/E/F/G/I (Histone H2B.1 A) (Histone H2B.a) (H2B/a) (Histone H2B.g) (H2B/g) (Histone H2B.h) (H2B/h) (Histone H2B.k) (H2B/k) (Histone H2B.l) (H2B/l)	Histone H2A type 3	0.42	1144	917	787	0	no	27	3	R-HSA-3214847;R-HSA-3214815	2	0	No	NA	No	0	NF	1	DNA binding [GO:0003677]	2	nuclear nucleosome [GO:0000788];extracellular exosome [GO:0070062]
P33778	Q8IUE6	Histone H2B type 1-B (Histone H2B.1) (Histone H2B.f) (H2B/f)	Histone H2A type 2-B	0.42	1138	852	730	0	no	27	3	R-HSA-3214847;R-HSA-3214815	2	0	No	NA	No	0	NF	1	DNA binding [GO:0003677]	2	nucleus [GO:0005634];nucleosome [GO:0000786]
Q13200	Q14974	26S proteasome non-ATPase regulatory subunit 2 (26S proteasome regulatory subunit RPN1) (26S proteasome regulatory subunit S2) (26S proteasome subunit p97) (Protein 55.11) (Tumor necrosis factor type 1 receptor-associated protein 2)	Importin subunit beta-1 (Importin-90) (Karyopherin subunit beta-1) (Nuclear factor p97) (Pore targeting complex 97 kDa subunit) (PTAC97)	0.42	657	707	419	0	NA	45	6	NF	0	0	No	NA	No	0	NF	0	NF	4	membrane [GO:0016020];cytosol [GO:0005829];nucleoplasm [GO:0005654];extracellular exosome [GO:0070062]
P11055	P13535	Myosin-3 (Muscle embryonic myosin heavy chain) (Myosin heavy chain 3) (Myosin heavy chain, fast skeletal muscle, embryonic) (SMHCE)	Myosin-8 (Myosin heavy chain 8) (Myosin heavy chain, skeletal muscle, perinatal) (MyHC-perinatal)	0.42	306	256	215	0	no	2	2	R-HSA-1445148;R-HSA-390522	2	0	yes	NA	No	3	muscle filament sliding [GO:0030049];ATP metabolic process [GO:0046034];skeletal muscle contraction [GO:0003009]	4	microfilament motor activity [GO:0000146];actin filament binding [GO:0051015];ATP binding [GO:0005524];myosin phosphatase activity [GO:0017018]	4	sarcomere [GO:0030017];muscle myosin complex [GO:0005859];cytosol [GO:0005829];myosin filament [GO:0032982]
Q8IUE6	Q16778	Histone H2A type 2-B	Histone H2B type 2-E (Histone H2B-GL105) (Histone H2B.q) (H2B/q)	0.42	852	1143	735	0	no	3	27	R-HSA-3214815;R-HSA-3214847	2	0	No	NA	No	0	NF	1	DNA binding [GO:0003677]	3	nucleus [GO:0005634];nucleosome [GO:0000786];extracellular exosome [GO:0070062]
O75083	Q01518	WD repeat-containing protein 1 (Actin-interacting protein 1) (AIP1) (NORI-1)	Adenylyl cyclase-associated protein 1 (CAP 1)	0.42	994	834	649	0	no	1	2	R-HSA-114608	1	0	No	NA	No	0	NF	0	NF	1	extracellular exosome [GO:0070062]
P62805	P06899	Histone H4	Histone H2B type 1-J (Histone H2B.1) (Histone H2B.r) (H2B/r)	0.42	1115	1142	923	0	no	30	27	R-HSA-5617472;R-HSA-73777;R-HSA-5693565;R-HSA-606279;R-HSA-3214847;R-HSA-977225;R-HSA-427413;R-HSA-171306;R-HSA-5693571;R-HSA-5625886;R-HSA-5334118;R-HSA-5578749;R-HSA-912446;R-HSA-2559586;R-HSA-3214815;R-HSA-69473;R-HSA-201722;R-HSA-1221632;R-HSA-2559582;R-HSA-212300;R-HSA-5693607;R-HSA-2559580;R-HSA-73728;R-HSA-427359;R-HSA-2299718;R-HSA-427389;R-HSA-5250924	27	0	No	NA	No	1	nucleosome assembly [GO:0006334]	1	DNA binding [GO:0003677]	3	nucleus [GO:0005634];nucleosome [GO:0000786];nucleoplasm [GO:0005654]
P02533	Q86YZ3	Keratin, type I cytoskeletal 14 (Cytokeratin-14) (CK-14) (Keratin-14) (K14)	Hornerin	0.42	707	294	280	0	no	1	0	NF	0	0	No	NA	No	0	NF	0	NF	3	nucleus [GO:0005634];cytoplasm [GO:0005737];extracellular exosome [GO:0070062]
Q7L7L0	Q99880	Histone H2A type 3	Histone H2B type 1-L (Histone H2B.c) (H2B/c)	0.42	917	1138	782	0	no	3	27	R-HSA-3214815;R-HSA-3214847	2	0	No	NA	No	0	NF	1	DNA binding [GO:0003677]	2	nuclear nucleosome [GO:0000788];extracellular exosome [GO:0070062]
P0CG39	Q05639	POTE ankyrin domain family member J	Elongation factor 1-alpha 2 (EF-1-alpha-2) (Eukaryotic elongation factor 1 A-2) (eEF1A-2) (Statin-S1)	0.42	1552	1397	1235	0	no	0	1	NF	0	0	No	NA	No	0	NF	0	NF	0	NF
P55786	P45974	Puromycin-sensitive aminopeptidase (PSA) (EC 3.4.11.14) (Cytosol alanyl aminopeptidase) (AAP-S)	Ubiquitin carboxyl-terminal hydrolase 5 (EC 3.4.19.12) (Deubiquitinating enzyme 5) (Isopeptidase T) (Ubiquitin thioesterase 5) (Ubiquitin-specific-processing protease 5)	0.41	757	690	474	0	no	1	0	NF	0	0	No	NA	No	0	NF	1	zinc ion binding [GO:0008270]	0	NF
P22695	P49411	Cytochrome b-c1 complex subunit 2, mitochondrial (Complex III subunit 2) (Core protein II) (Ubiquinol-cytochrome-c reductase complex core protein 2)	Elongation factor Tu, mitochondrial (EF-Tu) (P43)	0.41	722	846	534	0	yes	1	1	NF	0	0	No	NA	No	0	NF	0	NF	2	extracellular exosome [GO:0070062];mitochondrion [GO:0005739]
Q9UKX2	Q14896	Myosin-2 (Myosin heavy chain 2) (Myosin heavy chain 2a) (MyHC-2a) (Myosin heavy chain IIa) (MyHC-IIa) (Myosin heavy chain, skeletal muscle, adult 2)	Myosin-binding protein C, cardiac-type (Cardiac MyBP-C) (C-protein, cardiac muscle isoform)	0.41	391	193	189	0	no	2	1	NF	0	0	No	NA	No	1	muscle filament sliding [GO:0030049]	0	NF	2	sarcomere [GO:0030017];cytosol [GO:0005829]
Q14315	P12111	Filamin-C (FLN-C) (FLNc) (ABP-280-like protein) (ABP-L) (Actin-binding-like protein) (Filamin-2) (Gamma-filamin)	Collagen alpha-3(VI) chain	0.41	1202	1125	898	0	NA	1	7	NF	0	0	No	NA	No	0	NF	0	NF	1	sarcolemma [GO:0042383]
P01602	P01606	Ig heavy chain V-I region 5 (Ig kappa chain V-I region HK102) (Immunoglobulin kappa variable 1-5) (Fragment)	Ig kappa chain V-I region OU	0.41	88	81	49	0	no	14	14	R-HSA-2871796;R-HSA-2730905;R-HSA-166663;R-HSA-173623;R-HSA-2871837;R-HSA-2168880;R-HSA-2454202;R-HSA-2029485;R-HSA-5690714;R-HSA-2871809;R-HSA-198933;R-HSA-2029481;R-HSA-983695;R-HSA-2029482	14	NA	NA	NA	No	7	regulation of immune response [GO:0050776];immune response [GO:0006955];complement activation, classical pathway [GO:0006958];Fc-epsilon receptor signaling pathway [GO:0038095];Fc-gamma receptor signaling pathway involved in phagocytosis [GO:0038096];receptor-mediated endocytosis [GO:0006898];complement activation [GO:0006956]	2	antigen binding [GO:0003823];serine-type endopeptidase activity [GO:0004252]	2	extracellular region [GO:0005576];plasma membrane [GO:0005886]
P01602	P01607	Ig heavy chain V-I region 5 (Ig kappa chain V-I region HK102) (Immunoglobulin kappa variable 1-5) (Fragment)	Ig kappa chain V-I region Rei	0.41	88	97	57	0	no	14	14	R-HSA-2871796;R-HSA-2730905;R-HSA-166663;R-HSA-173623;R-HSA-2871837;R-HSA-2168880;R-HSA-2454202;R-HSA-2029485;R-HSA-5690714;R-HSA-2871809;R-HSA-198933;R-HSA-2029481;R-HSA-983695;R-HSA-2029482	14	NA	NA	NA	No	7	regulation of immune response [GO:0050776];immune response [GO:0006955];complement activation, classical pathway [GO:0006958];Fc-epsilon receptor signaling pathway [GO:0038095];Fc-gamma receptor signaling pathway involved in phagocytosis [GO:0038096];receptor-mediated endocytosis [GO:0006898];complement activation [GO:0006956]	2	antigen binding [GO:0003823];serine-type endopeptidase activity [GO:0004252]	4	extracellular region [GO:0005576];plasma membrane [GO:0005886];extracellular exosome [GO:0070062];blood microparticle [GO:0072562]
P14618	P06733	Pyruvate kinase PKM (EC 2.7.1.40) (Cytosolic thyroid hormone-binding protein) (CTHBP) (Opa-interacting protein 3) (OIP-3) (Pyruvate kinase 2/3) (Pyruvate kinase muscle isozyme) (Thyroid hormone-binding protein 1) (THBP1) (Tumor M2-PK) (p58)	Alpha-enolase (EC 4.2.1.11) (2-phospho-D-glycerate hydro-lyase) (C-myc promoter-binding protein) (Enolase 1) (MBP-1) (MPB-1) (Non-neural enolase) (NNE) (Phosphopyruvate hydratase) (Plasminogen-binding protein)	0.41	1341	1341	1111	0	NA	2	2	R-HSA-70171;R-HSA-70171	2	0	No	NA	No	1	canonical glycolysis [GO:0061621]	3	cadherin binding involved in cell-cell adhesion [GO:0098641];magnesium ion binding [GO:0000287];poly(A) RNA binding [GO:0044822]	6	cell-cell adherens junction [GO:0005913];cytosol [GO:0005829];cytoplasm [GO:0005737];myelin sheath [GO:0043209];nucleus [GO:0005634];extracellular exosome [GO:0070062]
P29401	P34931	Transketolase (TK) (EC 2.2.1.1)	Heat shock 70 kDa protein 1-like (Heat shock 70 kDa protein 1L) (Heat shock 70 kDa protein 1-Hom) (HSP70-Hom)	0.41	1052	1265	836	0	no	2	3	NF	0	0	No	NA	No	0	NF	0	NF	2	nucleoplasm [GO:0005654];cytosol [GO:0005829]
P31040	O95831	Succinate dehydrogenase [ubiquinone] flavoprotein subunit, mitochondrial (EC 1.3.5.1) (Flavoprotein subunit of complex II) (Fp)	Apoptosis-inducing factor 1, mitochondrial (EC 1.1.1.-) (Programmed cell death protein 8)	0.41	723	698	466	0	NA	2	0	NF	0	0	No	NA	No	0	NF	0	NF	2	mitochondrial inner membrane [GO:0005743];mitochondrion [GO:0005739]
P12270	Q6P2Q9	Nucleoprotein TPR (Megator) (NPC-associated intranuclear protein) (Translocated promoter region protein)	Pre-mRNA-processing-splicing factor 8 (220 kDa U5 snRNP-specific protein) (PRP8 homolog) (Splicing factor Prp8) (p220)	0.41	743	603	494	0	no	17	2	NF	0	0	No	NA	No	0	NF	1	poly(A) RNA binding [GO:0044822]	2	nucleus [GO:0005634];nucleoplasm [GO:0005654]
P48643	P17987	T-complex protein 1 subunit epsilon (TCP-1-epsilon) (CCT-epsilon)	T-complex protein 1 subunit alpha (TCP-1-alpha) (CCT-alpha)	0.41	613	802	443	1	yes	6	6	R-HSA-389957;R-HSA-6814122;R-HSA-390471;R-HSA-5620922;R-HSA-389960;R-HSA-390450	6	0	No	NA	No	8	positive regulation of protein localization to Cajal body [GO:1904871];toxin transport [GO:1901998];protein folding [GO:0006457];positive regulation of telomere maintenance via telomerase [GO:0032212];positive regulation of establishment of protein localization to telomere [GO:1904851];binding of sperm to zona pellucida [GO:0007339];positive regulation of telomerase RNA localization to Cajal body…	1	ATP binding [GO:0005524]	8	centrosome [GO:0005813];extracellular exosome [GO:0070062];zona pellucida receptor complex [GO:0002199];microtubule [GO:0005874];chaperonin-containing T-complex [GO:0005832];cell body [GO:0044297];myelin sheath [GO:0043209];cytosol [GO:0005829]
P08670	P68366	Vimentin	Tubulin alpha-4A chain (Alpha-tubulin 1) (Testis-specific alpha-tubulin) (Tubulin H2-alpha) (Tubulin alpha-1 chain)	0.41	1656	1599	1460	0	NA	2	29	NF	0	0	No	NA	No	0	NF	1	structural constituent of cytoskeleton [GO:0005200]	2	cytosol [GO:0005829];extracellular exosome [GO:0070062]
P40227	P50991	T-complex protein 1 subunit zeta (TCP-1-zeta) (Acute morphine dependence-related protein 2) (CCT-zeta-1) (HTR3) (Tcp20)	T-complex protein 1 subunit delta (TCP-1-delta) (CCT-delta) (Stimulator of TAR RNA-binding)	0.41	796	738	490	0	yes	5	6	R-HSA-389957;R-HSA-6814122;R-HSA-390471;R-HSA-389960;R-HSA-390450	5	0	No	NA	No	6	positive regulation of protein localization to Cajal body [GO:1904871];protein folding [GO:0006457];positive regulation of telomere maintenance via telomerase [GO:0032212];positive regulation of establishment of protein localization to telomere [GO:1904851];positive regulation of telomerase RNA localization to Cajal body [GO:1904874];protein stabilization [GO:0050821]	3	ATP binding [GO:0005524];unfolded protein binding [GO:0051082];poly(A) RNA binding [GO:0044822]	5	microtubule [GO:0005874];chaperonin-containing T-complex [GO:0005832];cytoplasm [GO:0005737];cytosol [GO:0005829];extracellular exosome [GO:0070062]
P23527	P57053	Histone H2B type 1-O (Histone H2B.2) (Histone H2B.n) (H2B/n)	Histone H2B type F-S (Histone H2B.s) (H2B/s)	0.41	355	410	233	0	no	27	25	R-HSA-5617472;R-HSA-73777;R-HSA-606279;R-HSA-5693565;R-HSA-977225;R-HSA-427413;R-HSA-171306;R-HSA-5693571;R-HSA-5625886;R-HSA-5334118;R-HSA-5578749;R-HSA-2559586;R-HSA-912446;R-HSA-69473;R-HSA-201722;R-HSA-1221632;R-HSA-2559582;R-HSA-212300;R-HSA-5693607;R-HSA-2559580;R-HSA-73728;R-HSA-427359;R-HSA-2299718;R-HSA-427389;R-HSA-5250924	25	0	yes	NA	No	1	nucleosome assembly [GO:0006334]	1	DNA binding [GO:0003677]	4	nucleus [GO:0005634];nuclear nucleosome [GO:0000788];nucleoplasm [GO:0005654];cytoplasm [GO:0005737]
P35579	Q09666	Myosin-9 (Cellular myosin heavy chain, type A) (Myosin heavy chain 9) (Myosin heavy chain, non-muscle IIa) (Non-muscle myosin heavy chain A) (NMMHC-A) (Non-muscle myosin heavy chain IIa) (NMMHC II-a) (NMMHC-IIA)	Neuroblast differentiation-associated protein AHNAK (Desmoyokin)	0.41	1582	1296	1228	1	yes	7	0	NF	0	0	No	NF	No	0	NF	2	cadherin binding involved in cell-cell adhesion [GO:0098641];poly(A) RNA binding [GO:0044822]	9	cell-cell adherens junction [GO:0005913];extracellular exosome [GO:0070062];cytoplasm [GO:0005737];actin cytoskeleton [GO:0015629];focal adhesion [GO:0005925];membrane [GO:0016020];nucleus [GO:0005634];plasma membrane [GO:0005886];cytosol [GO:0005829]
P55072	P11216	Transitional endoplasmic reticulum ATPase (TER ATPase) (EC 3.6.4.6) (15S Mg(2+)-ATPase p97 subunit) (Valosin-containing protein) (VCP)	Glycogen phosphorylase, brain form (EC 2.4.1.1)	0.41	1093	886	685	0	no	4	1	NF	0	0	No	NA	No	0	NF	0	NF	2	cytoplasm [GO:0005737];extracellular exosome [GO:0070062]
P31946	P18669	14-3-3 protein beta/alpha (Protein 1054) (Protein kinase C inhibitor protein 1) (KCIP-1) [Cleaved into: 14-3-3 protein beta/alpha, N-terminally processed]	Phosphoglycerate mutase 1 (EC 3.1.3.13) (EC 5.4.2.11) (EC 5.4.2.4) (BPG-dependent PGAM 1) (Phosphoglycerate mutase isozyme B) (PGAM-B)	0.41	862	761	554	0	no	16	2	NF	0	0	No	NA	No	0	NF	0	NF	4	membrane [GO:0016020];cytoplasm [GO:0005737];cytosol [GO:0005829];extracellular exosome [GO:0070062]
Q6S8J3	P04350	POTE ankyrin domain family member E (ANKRD26-like family C member 1A) (Prostate, ovary, testis-expressed protein on chromosome 2) (POTE-2)	Tubulin beta-4A chain (Tubulin 5 beta) (Tubulin beta-4 chain)	0.41	1710	1415	1359	0	no	0	28	NF	0	0	No	NA	No	0	NF	0	NF	1	extracellular exosome [GO:0070062]
P0CG38	P06733	POTE ankyrin domain family member I	Alpha-enolase (EC 4.2.1.11) (2-phospho-D-glycerate hydro-lyase) (C-myc promoter-binding protein) (Enolase 1) (MBP-1) (MPB-1) (Non-neural enolase) (NNE) (Phosphopyruvate hydratase) (Plasminogen-binding protein)	0.41	1639	1341	1213	0	NA	0	2	NF	0	0	No	NA	No	0	NF	0	NF	2	extracellular space [GO:0005615];extracellular exosome [GO:0070062]
P06733	A5A3E0	Alpha-enolase (EC 4.2.1.11) (2-phospho-D-glycerate hydro-lyase) (C-myc promoter-binding protein) (Enolase 1) (MBP-1) (MPB-1) (Non-neural enolase) (NNE) (Phosphopyruvate hydratase) (Plasminogen-binding protein)	POTE ankyrin domain family member F (ANKRD26-like family C member 1B) (Chimeric POTE-actin protein)	0.41	1341	1691	1256	0	NA	2	0	NF	0	0	No	NA	No	0	NF	0	NF	2	extracellular space [GO:0005615];extracellular exosome [GO:0070062]
P09211	P51149	Glutathione S-transferase P (EC 2.5.1.18) (GST class-pi) (GSTP1-1)	Ras-related protein Rab-7a	0.41	724	635	471	0	no	2	1	NF	0	0	No	NA	Yes	0	NF	0	NF	2	cytosol [GO:0005829];extracellular exosome [GO:0070062]
P38646	P11021	Stress-70 protein, mitochondrial (75 kDa glucose-regulated protein) (GRP-75) (Heat shock 70 kDa protein 9) (Mortalin) (MOT) (Peptide-binding protein 74) (PBP74)	78 kDa glucose-regulated protein (GRP-78) (Endoplasmic reticulum lumenal Ca(2+)-binding protein grp78) (Heat shock 70 kDa protein 5) (Immunoglobulin heavy chain-binding protein) (BiP)	0.41	1075	1401	960	0	NA	2	7	R-HSA-3371453	1	0	yes	NA	No	1	negative regulation of apoptotic process [GO:0043066]	3	ATP binding [GO:0005524];ubiquitin protein ligase binding [GO:0031625];unfolded protein binding [GO:0051082]	5	focal adhesion [GO:0005925];myelin sheath [GO:0043209];extracellular matrix [GO:0031012];extracellular exosome [GO:0070062];mitochondrion [GO:0005739]
Q92841	P52272	Probable ATP-dependent RNA helicase DDX17 (EC 3.6.4.13) (DEAD box protein 17) (DEAD box protein p72) (RNA-dependent helicase p72)	Heterogeneous nuclear ribonucleoprotein M (hnRNP M)	0.41	834	879	607	0	no	0	3	NF	0	0	No	1332_Large Drosha complex	No	0	NF	2	poly(A) RNA binding [GO:0044822];RNA binding [GO:0003723]	3	nucleolus [GO:0005730];nucleoplasm [GO:0005654];membrane [GO:0016020]
P06899	Q5QNW6	Histone H2B type 1-J (Histone H2B.1) (Histone H2B.r) (H2B/r)	Histone H2B type 2-F	0.41	307	409	219	0	no	27	2	R-HSA-3214847;R-HSA-3214815	2	0	yes	NA	No	1	nucleosome assembly [GO:0006334]	1	DNA binding [GO:0003677]	4	nucleus [GO:0005634];nuclear nucleosome [GO:0000788];nucleoplasm [GO:0005654];cytoplasm [GO:0005737]
P07355	P04083	Annexin A2 (Annexin II) (Annexin-2) (Calpactin I heavy chain) (Calpactin-1 heavy chain) (Chromobindin-8) (Lipocortin II) (Placental anticoagulant protein IV) (PAP-IV) (Protein I) (p36)	Annexin A1 (Annexin I) (Annexin-1) (Calpactin II) (Calpactin-2) (Chromobindin-9) (Lipocortin I) (Phospholipase A2 inhibitory protein) (p35)	0.41	1101	843	699	0	no	2	5	R-HSA-445355	1	0	yes	NA	No	1	positive regulation of vesicle fusion [GO:0031340]	5	calcium ion binding [GO:0005509];cadherin binding involved in cell-cell adhesion [GO:0098641];phospholipase A2 inhibitor activity [GO:0019834];calcium-dependent protein binding [GO:0048306];calcium-dependent phospholipid binding [GO:0005544]	10	cell-cell adherens junction [GO:0005913];extracellular exosome [GO:0070062];vesicle [GO:0031982];cell surface [GO:0009986];endosome [GO:0005768];extracellular space [GO:0005615];sarcolemma [GO:0042383];nucleus [GO:0005634];basolateral plasma membrane [GO:0016323];plasma membrane [GO:0005886]
P0CF74	P01834	Ig lambda-6 chain C region	Ig kappa chain C region	0.41	453	588	340	0	no	14	14	R-HSA-2871796;R-HSA-2730905;R-HSA-166663;R-HSA-173623;R-HSA-2871837;R-HSA-2168880;R-HSA-2454202;R-HSA-2029485;R-HSA-5690714;R-HSA-2871809;R-HSA-198933;R-HSA-2029481;R-HSA-983695;R-HSA-2029482	14	NA	NA	NA	No	12	regulation of immune response [GO:0050776];phagocytosis, recognition [GO:0006910];complement activation, classical pathway [GO:0006958];innate immune response [GO:0045087];defense response to bacterium [GO:0042742];Fc-epsilon receptor signaling pathway [GO:0038095];phagocytosis, engulfment [GO:0006911];B cell receptor signaling pathway [GO:0050853];Fc-gamma receptor signaling pathway involved in …	3	immunoglobulin receptor binding [GO:0034987];antigen binding [GO:0003823];serine-type endopeptidase activity [GO:0004252]	6	immunoglobulin complex, circulating [GO:0042571];blood microparticle [GO:0072562];extracellular space [GO:0005615];external side of plasma membrane [GO:0009897];extracellular region [GO:0005576];plasma membrane [GO:0005886]
P06733	P04406	Alpha-enolase (EC 4.2.1.11) (2-phospho-D-glycerate hydro-lyase) (C-myc promoter-binding protein) (Enolase 1) (MBP-1) (MPB-1) (Non-neural enolase) (NNE) (Phosphopyruvate hydratase) (Plasminogen-binding protein)	Glyceraldehyde-3-phosphate dehydrogenase (GAPDH) (EC 1.2.1.12) (Peptidyl-cysteine S-nitrosylase GAPDH) (EC 2.6.99.-)	0.41	1341	1248	1108	0	NA	2	2	R-HSA-70263;R-HSA-70171	2	0	No	NA	No	2	canonical glycolysis [GO:0061621];gluconeogenesis [GO:0006094]	0	NF	5	nucleus [GO:0005634];membrane [GO:0016020];cytoplasm [GO:0005737];cytosol [GO:0005829];extracellular exosome [GO:0070062]
P63010	O95782	AP-2 complex subunit beta (AP105B) (Adaptor protein complex AP-2 subunit beta) (Adaptor-related protein complex 2 subunit beta) (Beta-2-adaptin) (Beta-adaptin) (Clathrin assembly protein complex 2 beta large chain) (Plasma membrane adaptor HA2/AP2 adaptin beta subunit)	AP-2 complex subunit alpha-1 (100 kDa coated vesicle protein A) (Adaptor protein complex AP-2 subunit alpha-1) (Adaptor-related protein complex 2 subunit alpha-1) (Alpha-adaptin A) (Alpha1-adaptin) (Clathrin assembly protein complex 2 alpha-A large chain) (Plasma membrane adaptor HA2/AP2 adaptin alpha A subunit)	0.41	749	513	382	0	yes	9	9	R-HSA-177504;R-HSA-182971;R-HSA-3928665;R-HSA-2132295;R-HSA-182218;R-HSA-5099900;R-HSA-437239;R-HSA-167590;R-HSA-416993	9	0	No	NA	No	8	Wnt signaling pathway, planar cell polarity pathway [GO:0060071];clathrin-mediated endocytosis [GO:0072583];negative regulation of epidermal growth factor receptor signaling pathway [GO:0042059];regulation of defense response to virus by virus [GO:0050690];intracellular protein transport [GO:0006886];microtubule-based movement [GO:0007018];antigen processing and presentation of exogenous peptide …	1	protein transporter activity [GO:0008565]	7	cytosol [GO:0005829];plasma membrane [GO:0005886];endolysosome membrane [GO:0036020];endocytic vesicle membrane [GO:0030666];membrane [GO:0016020];AP-2 adaptor complex [GO:0030122];clathrin-coated endocytic vesicle membrane [GO:0030669]
P04406	P04075	Glyceraldehyde-3-phosphate dehydrogenase (GAPDH) (EC 1.2.1.12) (Peptidyl-cysteine S-nitrosylase GAPDH) (EC 2.6.99.-)	Fructose-bisphosphate aldolase A (EC 4.1.2.13) (Lung cancer antigen NY-LU-1) (Muscle-type aldolase)	0.41	1248	1132	964	0	yes	2	3	R-HSA-70263;R-HSA-70171	2	0	No	NA	No	2	canonical glycolysis [GO:0061621];gluconeogenesis [GO:0006094]	1	identical protein binding [GO:0042802]	4	nucleus [GO:0005634];membrane [GO:0016020];cytosol [GO:0005829];extracellular exosome [GO:0070062]
P13646	P48668	Keratin, type I cytoskeletal 13 (Cytokeratin-13) (CK-13) (Keratin-13) (K13)	Keratin, type II cytoskeletal 6C (Cytokeratin-6C) (CK-6C) (Cytokeratin-6E) (CK-6E) (Keratin K6h) (Keratin-6C) (K6C) (Type-II keratin Kb12)	0.41	690	916	576	0	yes	0	0	NF	0	0	No	NA	No	0	NF	1	structural molecule activity [GO:0005198]	2	keratin filament [GO:0045095];extracellular exosome [GO:0070062]
Q14568	Q58FF6	Heat shock protein HSP 90-alpha A2 (Heat shock 90 kDa protein 1 alpha-like 3) (Heat shock protein HSP 90-alpha A2 pseudogene)	Putative heat shock protein HSP 90-beta 4	0.41	964	898	597	0	no	0	0	NF	0	NA	NA	NA	No	2	protein folding [GO:0006457];response to stress [GO:0006950]	1	ATP binding [GO:0005524]	1	cytoplasm [GO:0005737]
P12270	O75643	Nucleoprotein TPR (Megator) (NPC-associated intranuclear protein) (Translocated promoter region protein)	U5 small nuclear ribonucleoprotein 200 kDa helicase (EC 3.6.4.13) (Activating signal cointegrator 1 complex subunit 3-like 1) (BRR2 homolog) (U5 snRNP-specific 200 kDa protein) (U5-200KD)	0.41	743	614	501	0	no	17	2	NF	0	0	No	NA	No	0	NF	1	poly(A) RNA binding [GO:0044822]	2	nucleus [GO:0005634];nucleoplasm [GO:0005654]
A0M8Q6	B9A064	Ig lambda-7 chain C region	Immunoglobulin lambda-like polypeptide 5 (G lambda-1) (Germline immunoglobulin lambda 1)	0.41	226	249	157	0	no	14	0	NF	0	NA	NA	NA	No	7	phagocytosis, engulfment [GO:0006911];complement activation, classical pathway [GO:0006958];innate immune response [GO:0045087];defense response to bacterium [GO:0042742];phagocytosis, recognition [GO:0006910];B cell receptor signaling pathway [GO:0050853];positive regulation of B cell activation [GO:0050871]	2	immunoglobulin receptor binding [GO:0034987];antigen binding [GO:0003823]	3	immunoglobulin complex, circulating [GO:0042571];external side of plasma membrane [GO:0009897];blood microparticle [GO:0072562]
P55268	Q9HBL0	Laminin subunit beta-2 (Laminin B1s chain) (Laminin-11 subunit beta) (Laminin-14 subunit beta) (Laminin-15 subunit beta) (Laminin-3 subunit beta) (Laminin-4 subunit beta) (Laminin-7 subunit beta) (Laminin-9 subunit beta) (S-laminin subunit beta) (S-LAM beta)	Tensin-1	0.41	712	658	508	0	no	3	0	NF	0	0	No	NA	No	0	NF	0	NF	0	NF
P07355	P22626	Annexin A2 (Annexin II) (Annexin-2) (Calpactin I heavy chain) (Calpactin-1 heavy chain) (Chromobindin-8) (Lipocortin II) (Placental anticoagulant protein IV) (PAP-IV) (Protein I) (p36)	Heterogeneous nuclear ribonucleoproteins A2/B1 (hnRNP A2/B1)	0.41	1101	1072	835	0	no	2	2	NF	0	0	No	NA	No	0	NF	1	poly(A) RNA binding [GO:0044822]	3	nucleus [GO:0005634];extracellular exosome [GO:0070062];membrane [GO:0016020]
P78371	P50990	T-complex protein 1 subunit beta (TCP-1-beta) (CCT-beta)	T-complex protein 1 subunit theta (TCP-1-theta) (CCT-theta) (Renal carcinoma antigen NY-REN-15)	0.41	818	837	566	0	yes	6	6	R-HSA-389957;R-HSA-6814122;R-HSA-390471;R-HSA-5620922;R-HSA-389960;R-HSA-390450	6	0	No	NA	No	8	positive regulation of protein localization to Cajal body [GO:1904871];toxin transport [GO:1901998];protein folding [GO:0006457];positive regulation of telomere maintenance via telomerase [GO:0032212];positive regulation of establishment of protein localization to telomere [GO:1904851];binding of sperm to zona pellucida [GO:0007339];positive regulation of telomerase RNA localization to Cajal body…	1	ATP binding [GO:0005524]	7	cytosol [GO:0005829];zona pellucida receptor complex [GO:0002199];microtubule [GO:0005874];cell body [GO:0044297];chaperonin-containing T-complex [GO:0005832];cytoplasm [GO:0005737];extracellular exosome [GO:0070062]
P01024	P02545	Complement C3 (C3 and PZP-like alpha-2-macroglobulin domain-containing protein 1) [Cleaved into: Complement C3 beta chain; C3-beta-c (C3bc); Complement C3 alpha chain; C3a anaphylatoxin; Acylation stimulating protein (ASP) (C3adesArg); Complement C3b alpha' chain; Complement C3c alpha' chain fragment 1; Complement C3dg fragment; Complement C3g fragment; Complement C3d fragment; Complement C3f fra…	Prelamin-A/C [Cleaved into: Lamin-A/C (70 kDa lamin) (Renal carcinoma antigen NY-REN-32)]	0.41	994	1181	838	0	NA	6	9	NF	0	0	No	NA	No	0	NF	0	NF	0	NF
P05181	Q14032	Cytochrome P450 2E1 (EC 1.14.13.-) (4-nitrophenol 2-hydroxylase) (EC 1.14.13.n7) (CYPIIE1) (Cytochrome P450-J) [Cleaved into: Cytochrome P450 2E1, N-terminally processed]	Bile acid-CoA:amino acid N-acyltransferase (BACAT) (BAT) (EC 2.3.1.65) (Glycine N-choloyltransferase) (Long-chain fatty-acyl-CoA hydrolase) (EC 3.1.2.2)	0.41	57	64	43	0	no	2	2	NF	0	0	No	NA	No	0	NF	0	NF	0	NF
Q9BQE3	P14618	Tubulin alpha-1C chain (Alpha-tubulin 6) (Tubulin alpha-6 chain)	Pyruvate kinase PKM (EC 2.7.1.40) (Cytosolic thyroid hormone-binding protein) (CTHBP) (Opa-interacting protein 3) (OIP-3) (Pyruvate kinase 2/3) (Pyruvate kinase muscle isozyme) (Thyroid hormone-binding protein 1) (THBP1) (Tumor M2-PK) (p58)	0.41	1659	1341	1274	0	NA	22	2	NF	0	0	No	NA	No	0	NF	0	NF	3	vesicle [GO:0031982];nucleus [GO:0005634];cytoplasm [GO:0005737]
P07900	P14625	Heat shock protein HSP 90-alpha (Heat shock 86 kDa) (HSP 86) (HSP86) (Lipopolysaccharide-associated protein 2) (LAP-2) (LPS-associated protein 2) (Renal carcinoma antigen NY-REN-38)	Endoplasmin (94 kDa glucose-regulated protein) (GRP-94) (Heat shock protein 90 kDa beta member 1) (Tumor rejection antigen 1) (gp96 homolog)	0.41	1498	1266	1171	0	no	24	3	NF	0	0	No	NA	No	1	receptor-mediated endocytosis [GO:0006898]	1	ATP binding [GO:0005524]	10	extracellular matrix [GO:0031012];cytosol [GO:0005829];endocytic vesicle lumen [GO:0071682];plasma membrane [GO:0005886];membrane [GO:0016020];melanosome [GO:0042470];nucleus [GO:0005634];extracellular region [GO:0005576];perinuclear region of cytoplasm [GO:0048471];extracellular exosome [GO:0070062]
P62979	A5A3E0	Ubiquitin-40S ribosomal protein S27a (Ubiquitin carboxyl extension protein 80) [Cleaved into: Ubiquitin; 40S ribosomal protein S27a]	POTE ankyrin domain family member F (ANKRD26-like family C member 1B) (Chimeric POTE-actin protein)	0.41	1435	1691	1368	0	NA	153	0	NF	0	0	No	NA	Yes	0	NF	0	NF	2	extracellular space [GO:0005615];extracellular exosome [GO:0070062]
Q71DI3	Q96QV6	Histone H3.2 (Histone H3/m) (Histone H3/o)	Histone H2A type 1-A (Histone H2A/r)	0.41	831	805	577	0	no	24	3	R-HSA-3214815;R-HSA-3214847;R-HSA-3214858	3	0	No	NA	No	0	NF	1	DNA binding [GO:0003677]	3	nucleus [GO:0005634];nucleosome [GO:0000786];extracellular exosome [GO:0070062]
P40939	P38646	Trifunctional enzyme subunit alpha, mitochondrial (78 kDa gastrin-binding protein) (TP-alpha) [Includes: Long-chain enoyl-CoA hydratase (EC 4.2.1.17); Long chain 3-hydroxyacyl-CoA dehydrogenase (EC 1.1.1.211)]	Stress-70 protein, mitochondrial (75 kDa glucose-regulated protein) (GRP-75) (Heat shock 70 kDa protein 9) (Mortalin) (MOT) (Peptide-binding protein 74) (PBP74)	0.41	955	1079	773	0	NA	7	2	NF	0	0	No	NA	No	0	NF	0	NF	3	extracellular matrix [GO:0031012];mitochondrion [GO:0005739];mitochondrial nucleoid [GO:0042645]
P06899	P58876	Histone H2B type 1-J (Histone H2B.1) (Histone H2B.r) (H2B/r)	Histone H2B type 1-D (HIRA-interacting protein 2) (Histone H2B.1 B) (Histone H2B.b) (H2B/b)	0.41	307	399	216	0	no	27	27	R-HSA-5617472;R-HSA-73777;R-HSA-606279;R-HSA-5693565;R-HSA-3214847;R-HSA-977225;R-HSA-427413;R-HSA-171306;R-HSA-5693571;R-HSA-5625886;R-HSA-5334118;R-HSA-5578749;R-HSA-2559586;R-HSA-912446;R-HSA-3214815;R-HSA-69473;R-HSA-201722;R-HSA-1221632;R-HSA-2559582;R-HSA-212300;R-HSA-5693607;R-HSA-2559580;R-HSA-73728;R-HSA-427359;R-HSA-2299718;R-HSA-427389;R-HSA-5250924	27	0	yes	NA	No	1	nucleosome assembly [GO:0006334]	1	DNA binding [GO:0003677]	4	nucleus [GO:0005634];nuclear nucleosome [GO:0000788];nucleoplasm [GO:0005654];cytoplasm [GO:0005737]
O43426	O94856	Synaptojanin-1 (EC 3.1.3.36) (Synaptic inositol 1,4,5-trisphosphate 5-phosphatase 1)	Neurofascin	0.41	120	130	77	0	NA	3	2	NF	0	0	No	NA	No	0	NF	0	NF	0	NF
P62805	P33778	Histone H4	Histone H2B type 1-B (Histone H2B.1) (Histone H2B.f) (H2B/f)	0.41	1115	1138	918	0	no	30	27	R-HSA-5617472;R-HSA-73777;R-HSA-5693565;R-HSA-606279;R-HSA-3214847;R-HSA-977225;R-HSA-427413;R-HSA-171306;R-HSA-5693571;R-HSA-5625886;R-HSA-5334118;R-HSA-5578749;R-HSA-912446;R-HSA-2559586;R-HSA-3214815;R-HSA-69473;R-HSA-201722;R-HSA-1221632;R-HSA-2559582;R-HSA-212300;R-HSA-5693607;R-HSA-2559580;R-HSA-73728;R-HSA-427359;R-HSA-2299718;R-HSA-427389;R-HSA-5250924	27	0	No	1227_H2AX complex II	No	1	nucleosome assembly [GO:0006334]	1	DNA binding [GO:0003677]	4	nuclear chromosome, telomeric region [GO:0000784];nucleus [GO:0005634];nucleosome [GO:0000786];nucleoplasm [GO:0005654]
Q5XKE5	P19012	Keratin, type II cytoskeletal 79 (Cytokeratin-79) (CK-79) (Keratin-6-like) (Keratin-6L) (Keratin-79) (K79) (Type-II keratin Kb38)	Keratin, type I cytoskeletal 15 (Cytokeratin-15) (CK-15) (Keratin-15) (K15)	0.41	670	593	399	1	yes	0	0	NF	0	0	No	NA	No	0	NF	0	NF	1	extracellular exosome [GO:0070062]
Q93079	P06899	Histone H2B type 1-H (Histone H2B.j) (H2B/j)	Histone H2B type 1-J (Histone H2B.1) (Histone H2B.r) (H2B/r)	0.41	409	307	219	0	no	27	27	R-HSA-5617472;R-HSA-73777;R-HSA-606279;R-HSA-5693565;R-HSA-3214847;R-HSA-977225;R-HSA-427413;R-HSA-171306;R-HSA-5693571;R-HSA-5625886;R-HSA-5334118;R-HSA-5578749;R-HSA-2559586;R-HSA-912446;R-HSA-3214815;R-HSA-69473;R-HSA-201722;R-HSA-1221632;R-HSA-2559582;R-HSA-212300;R-HSA-5693607;R-HSA-2559580;R-HSA-73728;R-HSA-427359;R-HSA-2299718;R-HSA-427389;R-HSA-5250924	27	0	yes	NA	No	1	nucleosome assembly [GO:0006334]	1	DNA binding [GO:0003677]	5	nucleus [GO:0005634];nuclear nucleosome [GO:0000788];nucleoplasm [GO:0005654];cytoplasm [GO:0005737];nucleosome [GO:0000786]
Q92928	P09211	Putative Ras-related protein Rab-1C (hRab1c)	Glutathione S-transferase P (EC 2.5.1.18) (GST class-pi) (GSTP1-1)	0.41	735	724	493	0	no	0	2	NF	0	NA	NA	NA	Yes	0	NF	0	NF	0	NF
P62820	Q06830	Ras-related protein Rab-1A (YPT1-related protein)	Peroxiredoxin-1 (EC 1.11.1.15) (Natural killer cell-enhancing factor A) (NKEF-A) (Proliferation-associated gene protein) (PAG) (Thioredoxin peroxidase 2) (Thioredoxin-dependent peroxide reductase 2)	0.41	757	961	576	0	no	4	2	NF	0	0	No	NA	Yes	0	NF	1	cadherin binding involved in cell-cell adhesion [GO:0098641]	4	melanosome [GO:0042470];cell-cell adherens junction [GO:0005913];cytosol [GO:0005829];extracellular exosome [GO:0070062]
P68363	P06576	Tubulin alpha-1B chain (Alpha-tubulin ubiquitous) (Tubulin K-alpha-1) (Tubulin alpha-ubiquitous chain)	ATP synthase subunit beta, mitochondrial (EC 3.6.3.14)	0.41	1662	1229	1163	0	no	21	3	NF	0	0	No	NF	No	0	NF	0	NF	2	extracellular exosome [GO:0070062];myelin sheath [GO:0043209]
P68032	P68363	Actin, alpha cardiac muscle 1 (Alpha-cardiac actin)	Tubulin alpha-1B chain (Alpha-tubulin ubiquitous) (Tubulin K-alpha-1) (Tubulin alpha-ubiquitous chain)	0.41	1749	1662	1613	0	no	1	21	NF	0	0	No	NA	No	0	NF	0	NF	1	extracellular exosome [GO:0070062]
P51991	P09651	Heterogeneous nuclear ribonucleoprotein A3 (hnRNP A3)	Heterogeneous nuclear ribonucleoprotein A1 (hnRNP A1) (Helix-destabilizing protein) (Single-strand RNA-binding protein) (hnRNP core protein A1) [Cleaved into: Heterogeneous nuclear ribonucleoprotein A1, N-terminally processed]	0.41	676	758	507	1	yes	2	3	R-HSA-72203;R-HSA-72163	2	0	yes	1181_C complex spliceosome	No	3	gene expression [GO:0010467];mRNA transport [GO:0051028];mRNA splicing, via spliceosome [GO:0000398]	3	nucleotide binding [GO:0000166];poly(A) RNA binding [GO:0044822];RNA binding [GO:0003723]	5	cytoplasm [GO:0005737];intracellular ribonucleoprotein complex [GO:0030529];nucleoplasm [GO:0005654];catalytic step 2 spliceosome [GO:0071013];nucleus [GO:0005634]
Q99879	Q8IUE6	Histone H2B type 1-M (Histone H2B.e) (H2B/e)	Histone H2A type 2-B	0.41	1139	852	728	0	no	27	3	R-HSA-3214847;R-HSA-3214815	2	0	No	NA	No	0	NF	1	DNA binding [GO:0003677]	3	nucleus [GO:0005634];nucleosome [GO:0000786];extracellular exosome [GO:0070062]
P01602	P01593	Ig heavy chain V-I region 5 (Ig kappa chain V-I region HK102) (Immunoglobulin kappa variable 1-5) (Fragment)	Ig kappa chain V-I region AG	0.41	88	117	62	0	no	14	14	R-HSA-2871796;R-HSA-2730905;R-HSA-166663;R-HSA-173623;R-HSA-2871837;R-HSA-2168880;R-HSA-2454202;R-HSA-2029485;R-HSA-5690714;R-HSA-2871809;R-HSA-198933;R-HSA-2029481;R-HSA-983695;R-HSA-2029482	14	NA	NA	NA	No	7	regulation of immune response [GO:0050776];immune response [GO:0006955];complement activation, classical pathway [GO:0006958];Fc-epsilon receptor signaling pathway [GO:0038095];Fc-gamma receptor signaling pathway involved in phagocytosis [GO:0038096];receptor-mediated endocytosis [GO:0006898];complement activation [GO:0006956]	2	antigen binding [GO:0003823];serine-type endopeptidase activity [GO:0004252]	4	extracellular region [GO:0005576];plasma membrane [GO:0005886];extracellular exosome [GO:0070062];blood microparticle [GO:0072562]
Q13509	Q05639	Tubulin beta-3 chain (Tubulin beta-4 chain) (Tubulin beta-III)	Elongation factor 1-alpha 2 (EF-1-alpha-2) (Eukaryotic elongation factor 1 A-2) (eEF1A-2) (Statin-S1)	0.41	1390	1397	1159	0	no	22	1	NF	0	0	No	NA	No	0	NF	2	GTPase activity [GO:0003924];GTP binding [GO:0005525]	2	cytoplasm [GO:0005737];neuronal cell body [GO:0043025]
P35241	P34931	Radixin	Heat shock 70 kDa protein 1-like (Heat shock 70 kDa protein 1L) (Heat shock 70 kDa protein 1-Hom) (HSP70-Hom)	0.41	1127	1265	905	0	no	1	3	NF	0	0	No	NA	No	0	NF	0	NF	0	NF
Q7Z3Y7	P12035	Keratin, type I cytoskeletal 28 (Cytokeratin-28) (CK-28) (Keratin-25D) (K25D) (Keratin-28) (K28) (Type I inner root sheath-specific keratin-K25irs4)	Keratin, type II cytoskeletal 3 (65 kDa cytokeratin) (Cytokeratin-3) (CK-3) (Keratin-3) (K3) (Type-II keratin Kb3)	0.41	477	650	377	0	no	0	0	NF	0	0	No	NA	No	0	NF	1	structural molecule activity [GO:0005198]	2	intermediate filament [GO:0005882];extracellular exosome [GO:0070062]
Q6PEY2	P06576	Tubulin alpha-3E chain (Alpha-tubulin 3E)	ATP synthase subunit beta, mitochondrial (EC 3.6.3.14)	0.41	1579	1229	1115	0	no	19	3	NF	0	0	No	NA	No	0	NF	0	NF	1	nucleus [GO:0005634]
P62805	P23527	Histone H4	Histone H2B type 1-O (Histone H2B.2) (Histone H2B.n) (H2B/n)	0.41	1115	1141	919	0	no	30	27	R-HSA-5617472;R-HSA-73777;R-HSA-5693565;R-HSA-606279;R-HSA-3214847;R-HSA-977225;R-HSA-427413;R-HSA-171306;R-HSA-5693571;R-HSA-5625886;R-HSA-5334118;R-HSA-5578749;R-HSA-912446;R-HSA-2559586;R-HSA-3214815;R-HSA-69473;R-HSA-201722;R-HSA-1221632;R-HSA-2559582;R-HSA-212300;R-HSA-5693607;R-HSA-2559580;R-HSA-73728;R-HSA-427359;R-HSA-2299718;R-HSA-427389;R-HSA-5250924	27	0	No	NA	No	1	nucleosome assembly [GO:0006334]	1	DNA binding [GO:0003677]	3	nucleus [GO:0005634];nucleosome [GO:0000786];nucleoplasm [GO:0005654]
Q71U36	P06576	Tubulin alpha-1A chain (Alpha-tubulin 3) (Tubulin B-alpha-1) (Tubulin alpha-3 chain)	ATP synthase subunit beta, mitochondrial (EC 3.6.3.14)	0.41	1654	1229	1159	0	yes	28	3	NF	0	0	No	NF	No	0	NF	0	NF	3	nucleus [GO:0005634];extracellular exosome [GO:0070062];myelin sheath [GO:0043209]
Q99880	Q8IUE6	Histone H2B type 1-L (Histone H2B.c) (H2B/c)	Histone H2A type 2-B	0.41	1138	852	727	0	no	27	3	R-HSA-3214847;R-HSA-3214815	2	0	No	NA	No	0	NF	1	DNA binding [GO:0003677]	3	nucleus [GO:0005634];nucleosome [GO:0000786];extracellular exosome [GO:0070062]
P20853	P11712	Cytochrome P450 2A7 (EC 1.14.14.1) (CYPIIA7) (Cytochrome P450 IIA4)	Cytochrome P450 2C9 (EC 1.14.13.-) ((R)-limonene 6-monooxygenase) (EC 1.14.13.80) ((S)-limonene 6-monooxygenase) (EC 1.14.13.48) ((S)-limonene 7-monooxygenase) (EC 1.14.13.49) (CYPIIC9) (Cholesterol 25-hydroxylase) (EC 1.14.99.38) (Cytochrome P-450MP) (Cytochrome P450 MP-4) (Cytochrome P450 MP-8) (Cytochrome P450 PB-1) (S-mephenytoin 4-hydroxylase)	0.41	47	60	42	0	no	3	4	R-HSA-211981;R-HSA-211999	2	0	yes	NA	No	1	epoxygenase P450 pathway [GO:0019373]	5	heme binding [GO:0020037];steroid hydroxylase activity [GO:0008395];iron ion binding [GO:0005506];oxygen binding [GO:0019825];arachidonic acid epoxygenase activity [GO:0008392]	2	organelle membrane [GO:0031090];endoplasmic reticulum membrane [GO:0005789]
P35241	P54652	Radixin	Heat shock-related 70 kDa protein 2 (Heat shock 70 kDa protein 2)	0.41	1127	1349	963	0	no	1	3	NF	0	0	No	NA	No	0	NF	0	NF	2	extracellular exosome [GO:0070062];myelin sheath [GO:0043209]
P09211	Q9H0U4	Glutathione S-transferase P (EC 2.5.1.18) (GST class-pi) (GSTP1-1)	Ras-related protein Rab-1B	0.41	724	784	514	0	no	2	4	NF	0	0	No	NA	Yes	0	NF	0	NF	2	extracellular exosome [GO:0070062];mitochondrion [GO:0005739]
P12110	O15230	Collagen alpha-2(VI) chain	Laminin subunit alpha-5 (Laminin-10 subunit alpha) (Laminin-11 subunit alpha) (Laminin-15 subunit alpha)	0.41	818	709	551	0	NA	7	4	R-HSA-3000178	1	0	No	NA	No	1	extracellular matrix organization [GO:0030198]	0	NF	4	extracellular region [GO:0005576];extracellular matrix [GO:0031012];extracellular space [GO:0005615];extracellular exosome [GO:0070062]
P08133	P54652	Annexin A6 (67 kDa calelectrin) (Annexin VI) (Annexin-6) (Calphobindin-II) (CPB-II) (Chromobindin-20) (Lipocortin VI) (Protein III) (p68) (p70)	Heat shock-related 70 kDa protein 2 (Heat shock 70 kDa protein 2)	0.41	1249	1349	1047	0	no	1	3	NF	0	0	No	NA	No	0	NF	0	NF	4	nucleus [GO:0005634];mitochondrion [GO:0005739];extracellular exosome [GO:0070062];membrane [GO:0016020]
Q05707	P98160	Collagen alpha-1(XIV) chain (Undulin)	Basement membrane-specific heparan sulfate proteoglycan core protein (HSPG) (Perlecan) (PLC) [Cleaved into: Endorepellin; LG3 peptide]	0.41	775	965	689	0	NA	2	15	NF	0	0	No	NA	No	1	extracellular matrix organization [GO:0030198]	0	NF	3	extracellular region [GO:0005576];extracellular space [GO:0005615];extracellular exosome [GO:0070062]
Q9Y623	P11055	Myosin-4 (Myosin heavy chain 2b) (MyHC-2b) (Myosin heavy chain 4) (Myosin heavy chain IIb) (MyHC-IIb) (Myosin heavy chain, skeletal muscle, fetal)	Myosin-3 (Muscle embryonic myosin heavy chain) (Myosin heavy chain 3) (Myosin heavy chain, fast skeletal muscle, embryonic) (SMHCE)	0.41	248	274	194	0	no	1	2	R-HSA-1445148	1	0	yes	NA	No	3	muscle filament sliding [GO:0030049];ATP metabolic process [GO:0046034];actin filament-based movement [GO:0030048]	2	microfilament motor activity [GO:0000146];ATP binding [GO:0005524]	3	sarcomere [GO:0030017];muscle myosin complex [GO:0005859];myosin filament [GO:0032982]
P01023	P01024	Alpha-2-macroglobulin (Alpha-2-M) (C3 and PZP-like alpha-2-macroglobulin domain-containing protein 5)	Complement C3 (C3 and PZP-like alpha-2-macroglobulin domain-containing protein 1) [Cleaved into: Complement C3 beta chain; C3-beta-c (C3bc); Complement C3 alpha chain; C3a anaphylatoxin; Acylation stimulating protein (ASP) (C3adesArg); Complement C3b alpha' chain; Complement C3c alpha' chain fragment 1; Complement C3dg fragment; Complement C3g fragment; Complement C3d fragment; Complement C3f fra…	0.41	837	994	727	0	no	5	6	NF	0	0	yes	NA	No	0	NF	1	receptor binding [GO:0005102]	3	extracellular region [GO:0005576];extracellular exosome [GO:0070062];blood microparticle [GO:0072562]
P57053	Q16778	Histone H2B type F-S (Histone H2B.s) (H2B/s)	Histone H2B type 2-E (Histone H2B-GL105) (Histone H2B.q) (H2B/q)	0.41	391	342	222	0	no	25	27	R-HSA-5617472;R-HSA-73777;R-HSA-606279;R-HSA-5693565;R-HSA-977225;R-HSA-427413;R-HSA-171306;R-HSA-5693571;R-HSA-5625886;R-HSA-5334118;R-HSA-5578749;R-HSA-2559586;R-HSA-912446;R-HSA-69473;R-HSA-201722;R-HSA-1221632;R-HSA-2559582;R-HSA-212300;R-HSA-5693607;R-HSA-2559580;R-HSA-73728;R-HSA-427359;R-HSA-2299718;R-HSA-427389;R-HSA-5250924	25	0	yes	NA	No	4	nucleosome assembly [GO:0006334];antibacterial humoral response [GO:0019731];defense response to Gram-positive bacterium [GO:0050830];innate immune response in mucosa [GO:0002227]	1	DNA binding [GO:0003677]	5	nucleus [GO:0005634];nuclear nucleosome [GO:0000788];extracellular space [GO:0005615];cytoplasm [GO:0005737];nucleoplasm [GO:0005654]
P16662	O95954	UDP-glucuronosyltransferase 2B7 (UDPGT 2B7) (EC 2.4.1.17) (3,4-catechol estrogen-specific UDPGT) (UDP-glucuronosyltransferase 2B9) (UDPGT 2B9) (UDPGTh-2)	Formimidoyltransferase-cyclodeaminase (Formiminotransferase-cyclodeaminase) (FTCD) (LCHC1) [Includes: Glutamate formimidoyltransferase (EC 2.1.2.5) (Glutamate formiminotransferase) (Glutamate formyltransferase); Formimidoyltetrahydrofolate cyclodeaminase (EC 4.3.1.4) (Formiminotetrahydrofolate cyclodeaminase)]	0.41	122	137	84	0	no	1	1	NF	0	0	No	NA	No	0	NF	0	NF	1	extracellular exosome [GO:0070062]
P68431	Q96QV6	Histone H3.1 (Histone H3/a) (Histone H3/b) (Histone H3/c) (Histone H3/d) (Histone H3/f) (Histone H3/h) (Histone H3/i) (Histone H3/j) (Histone H3/k) (Histone H3/l)	Histone H2A type 1-A (Histone H2A/r)	0.41	831	805	577	0	NA	24	3	R-HSA-3214815;R-HSA-3214847;R-HSA-3214858	3	0	No	NA	No	0	NF	1	DNA binding [GO:0003677]	4	nuclear chromosome, telomeric region [GO:0000784];nucleus [GO:0005634];nucleosome [GO:0000786];extracellular exosome [GO:0070062]
P0CG48	A5A3E0	Polyubiquitin-C [Cleaved into: Ubiquitin]	POTE ankyrin domain family member F (ANKRD26-like family C member 1B) (Chimeric POTE-actin protein)	0.41	1428	1691	1361	0	NA	139	0	NF	0	0	No	NA	No	0	NF	0	NF	2	extracellular space [GO:0005615];extracellular exosome [GO:0070062]
P02787	P0C0L5	Serotransferrin (Transferrin) (Beta-1 metal-binding globulin) (Siderophilin)	Complement C4-B (Basic complement C4) (C3 and PZP-like alpha-2-macroglobulin domain-containing protein 3) [Cleaved into: Complement C4 beta chain; Complement C4-B alpha chain; C4a anaphylatoxin; C4b-B; C4d-B; Complement C4 gamma chain]	0.41	884	772	616	0	NA	3	3	NF	0	0	No	NA	Yes	0	NF	0	NF	4	extracellular region [GO:0005576];extracellular space [GO:0005615];extracellular exosome [GO:0070062];blood microparticle [GO:0072562]
P02787	P0C0L4	Serotransferrin (Transferrin) (Beta-1 metal-binding globulin) (Siderophilin)	Complement C4-A (Acidic complement C4) (C3 and PZP-like alpha-2-macroglobulin domain-containing protein 2) [Cleaved into: Complement C4 beta chain; Complement C4-A alpha chain; C4a anaphylatoxin; C4b-A; C4d-A; Complement C4 gamma chain]	0.41	884	767	615	0	NA	3	3	NF	0	0	No	NA	Yes	0	NF	0	NF	4	extracellular region [GO:0005576];extracellular space [GO:0005615];extracellular exosome [GO:0070062];blood microparticle [GO:0072562]
P12236	P35232	ADP/ATP translocase 3 (ADP,ATP carrier protein 3) (ADP,ATP carrier protein, isoform T2) (ANT 2) (Adenine nucleotide translocator 3) (ANT 3) (Solute carrier family 25 member 6) [Cleaved into: ADP/ATP translocase 3, N-terminally processed]	Prohibitin	0.41	858	703	482	0	no	4	1	NF	0	0	No	NA	No	0	NF	0	NF	3	mitochondrial inner membrane [GO:0005743];nucleus [GO:0005634];mitochondrion [GO:0005739]
Q92841	O43390	Probable ATP-dependent RNA helicase DDX17 (EC 3.6.4.13) (DEAD box protein 17) (DEAD box protein p72) (RNA-dependent helicase p72)	Heterogeneous nuclear ribonucleoprotein R (hnRNP R)	0.41	834	732	533	0	no	0	2	NF	0	0	No	3082_DGCR8 multiprotein complex	No	0	NF	2	poly(A) RNA binding [GO:0044822];RNA binding [GO:0003723]	1	nucleoplasm [GO:0005654]
Q92835	Q92619	Phosphatidylinositol 3,4,5-trisphosphate 5-phosphatase 1 (EC 3.1.3.86) (Inositol polyphosphate-5-phosphatase of 145 kDa) (SIP-145) (SH2 domain-containing inositol 5'-phosphatase 1) (SH2 domain-containing inositol phosphatase 1) (SHIP-1) (p150Ship) (hp51CN)	Minor histocompatibility protein HA-1 [Cleaved into: Minor histocompatibility antigen HA-1 (mHag HA-1)]	0.41	210	212	133	0	NA	6	1	NF	0	0	No	NA	No	1	intracellular signal transduction [GO:0035556]	0	NF	1	cytosol [GO:0005829]
P08727	P08729	Keratin, type I cytoskeletal 19 (Cytokeratin-19) (CK-19) (Keratin-19) (K19)	Keratin, type II cytoskeletal 7 (Cytokeratin-7) (CK-7) (Keratin-7) (K7) (Sarcolectin) (Type-II keratin Kb7)	0.41	790	889	589	0	NA	0	0	NF	0	0	No	NA	No	1	viral process [GO:0016032]	0	NF	2	intermediate filament [GO:0005882];extracellular exosome [GO:0070062]
Q9BQE3	P06576	Tubulin alpha-1C chain (Alpha-tubulin 6) (Tubulin alpha-6 chain)	ATP synthase subunit beta, mitochondrial (EC 3.6.3.14)	0.41	1659	1229	1163	1	yes	22	3	NF	0	0	No	NF	No	0	NF	0	NF	1	nucleus [GO:0005634]
Q6S8J3	Q05639	POTE ankyrin domain family member E (ANKRD26-like family C member 1A) (Prostate, ovary, testis-expressed protein on chromosome 2) (POTE-2)	Elongation factor 1-alpha 2 (EF-1-alpha-2) (Eukaryotic elongation factor 1 A-2) (eEF1A-2) (Statin-S1)	0.41	1710	1397	1344	0	no	0	1	NF	0	0	No	NA	No	0	NF	0	NF	0	NF
P63261	Q71U36	Actin, cytoplasmic 2 (Gamma-actin) [Cleaved into: Actin, cytoplasmic 2, N-terminally processed]	Tubulin alpha-1A chain (Alpha-tubulin 3) (Tubulin B-alpha-1) (Tubulin alpha-3 chain)	0.41	1790	1654	1631	0	no	15	28	R-HSA-1445148;R-HSA-437239;R-HSA-5663220;R-HSA-5626467	4	0	No	NF	No	0	NF	1	structural constituent of cytoskeleton [GO:0005200]	4	myelin sheath [GO:0043209];nucleus [GO:0005634];cytosol [GO:0005829];extracellular exosome [GO:0070062]
P62805	Q8N257	Histone H4	Histone H2B type 3-B (H2B type 12)	0.41	1115	1134	915	0	no	30	27	R-HSA-5617472;R-HSA-73777;R-HSA-5693565;R-HSA-606279;R-HSA-3214847;R-HSA-977225;R-HSA-427413;R-HSA-171306;R-HSA-5693571;R-HSA-5625886;R-HSA-5334118;R-HSA-5578749;R-HSA-912446;R-HSA-2559586;R-HSA-3214815;R-HSA-69473;R-HSA-201722;R-HSA-1221632;R-HSA-2559582;R-HSA-212300;R-HSA-5693607;R-HSA-2559580;R-HSA-73728;R-HSA-427359;R-HSA-2299718;R-HSA-427389;R-HSA-5250924	27	0	No	1223_H2AX complex, isolated from cells without IR exposure;1227_H2AX complex II	No	1	nucleosome assembly [GO:0006334]	1	DNA binding [GO:0003677]	2	nucleus [GO:0005634];nucleoplasm [GO:0005654]
P62987	A5A3E0	Ubiquitin-60S ribosomal protein L40 (CEP52) (Ubiquitin A-52 residue ribosomal protein fusion product 1) [Cleaved into: Ubiquitin; 60S ribosomal protein L40]	POTE ankyrin domain family member F (ANKRD26-like family C member 1B) (Chimeric POTE-actin protein)	0.41	1429	1691	1362	0	NA	150	0	NF	0	0	No	NA	No	0	NF	0	NF	2	extracellular space [GO:0005615];extracellular exosome [GO:0070062]
P08123	Q9Y6C2	Collagen alpha-2(I) chain (Alpha-2 type I collagen)	EMILIN-1 (Elastin microfibril interface-located protein 1) (Elastin microfibril interfacer 1)	0.41	736	743	532	0	NA	15	1	NF	0	0	No	NA	No	0	NF	1	identical protein binding [GO:0042802]	3	extracellular region [GO:0005576];extracellular matrix [GO:0031012];extracellular exosome [GO:0070062]
P04406	Q9BYX7	Glyceraldehyde-3-phosphate dehydrogenase (GAPDH) (EC 1.2.1.12) (Peptidyl-cysteine S-nitrosylase GAPDH) (EC 2.6.99.-)	Putative beta-actin-like protein 3 (Kappa-actin) (POTE ankyrin domain family member K)	0.41	1248	1687	1188	0	no	2	1	NF	0	NA	NA	NA	No	0	NF	0	NF	2	cytosol [GO:0005829];extracellular exosome [GO:0070062]
P45880	P21796	Voltage-dependent anion-selective channel protein 2 (VDAC-2) (hVDAC2) (Outer mitochondrial membrane protein porin 2)	Voltage-dependent anion-selective channel protein 1 (VDAC-1) (hVDAC1) (Outer mitochondrial membrane protein porin 1) (Plasmalemmal porin) (Porin 31HL) (Porin 31HM)	0.41	726	855	545	0	yes	0	2	NF	0	0	yes	NA	No	1	anion transport [GO:0006820]	2	porin activity [GO:0015288];voltage-gated anion channel activity [GO:0008308]	10	extracellular exosome [GO:0070062];pore complex [GO:0046930];synaptic vesicle [GO:0008021];mitochondrial outer membrane [GO:0005741];mitochondrion [GO:0005739];membrane raft [GO:0045121];myelin sheath [GO:0043209];mitochondrial nucleoid [GO:0042645];mitochondrial inner membrane [GO:0005743];nucleus [GO:0005634]
O75390	P49411	Citrate synthase, mitochondrial (EC 2.3.3.1) (Citrate (Si)-synthase)	Elongation factor Tu, mitochondrial (EF-Tu) (P43)	0.41	739	846	512	0	no	2	1	NF	0	0	No	NF	No	0	NF	1	poly(A) RNA binding [GO:0044822]	2	extracellular exosome [GO:0070062];mitochondrion [GO:0005739]
O15230	Q9Y6C2	Laminin subunit alpha-5 (Laminin-10 subunit alpha) (Laminin-11 subunit alpha) (Laminin-15 subunit alpha)	EMILIN-1 (Elastin microfibril interface-located protein 1) (Elastin microfibril interfacer 1)	0.41	709	743	532	0	no	4	1	NF	0	0	No	NF	No	0	NF	0	NF	3	extracellular region [GO:0005576];extracellular matrix [GO:0031012];extracellular exosome [GO:0070062]
P01606	P01596	Ig kappa chain V-I region OU	Ig kappa chain V-I region CAR	0.41	81	44	39	0	no	14	14	R-HSA-2871796;R-HSA-2730905;R-HSA-166663;R-HSA-173623;R-HSA-2871837;R-HSA-2168880;R-HSA-2454202;R-HSA-2029485;R-HSA-5690714;R-HSA-2871809;R-HSA-198933;R-HSA-2029481;R-HSA-983695;R-HSA-2029482	14	NA	NA	NA	No	0	NA	0	NA	0	NA
P60709	Q71U36	Actin, cytoplasmic 1 (Beta-actin) [Cleaved into: Actin, cytoplasmic 1, N-terminally processed]	Tubulin alpha-1A chain (Alpha-tubulin 3) (Tubulin B-alpha-1) (Tubulin alpha-3 chain)	0.41	1790	1654	1631	1	NA	21	28	R-HSA-1445148;R-HSA-437239;R-HSA-389957;R-HSA-5663220;R-HSA-5626467	5	0	No	NF	No	0	NF	1	structural constituent of cytoskeleton [GO:0005200]	3	cytosol [GO:0005829];cytoplasmic ribonucleoprotein granule [GO:0036464];extracellular exosome [GO:0070062]
P06744	P78371	Glucose-6-phosphate isomerase (GPI) (EC 5.3.1.9) (Autocrine motility factor) (AMF) (Neuroleukin) (NLK) (Phosphoglucose isomerase) (PGI) (Phosphohexose isomerase) (PHI) (Sperm antigen 36) (SA-36)	T-complex protein 1 subunit beta (TCP-1-beta) (CCT-beta)	0.41	984	818	620	0	no	3	6	NF	0	0	No	NA	No	0	NF	1	ubiquitin protein ligase binding [GO:0031625]	4	myelin sheath [GO:0043209];cytoplasm [GO:0005737];cytosol [GO:0005829];extracellular exosome [GO:0070062]
P21796	P08758	Voltage-dependent anion-selective channel protein 1 (VDAC-1) (hVDAC1) (Outer mitochondrial membrane protein porin 1) (Plasmalemmal porin) (Porin 31HL) (Porin 31HM)	Annexin A5 (Anchorin CII) (Annexin V) (Annexin-5) (Calphobindin I) (CBP-I) (Endonexin II) (Lipocortin V) (Placental anticoagulant protein 4) (PP4) (Placental anticoagulant protein I) (PAP-I) (Thromboplastin inhibitor) (Vascular anticoagulant-alpha) (VAC-alpha)	0.41	860	851	623	0	no	2	0	NF	0	0	No	NA	Yes	0	NF	0	NF	4	synaptic vesicle [GO:0008021];nucleus [GO:0005634];extracellular exosome [GO:0070062];membrane [GO:0016020]
O60814	Q16778	Histone H2B type 1-K (H2B K) (HIRA-interacting protein 1)	Histone H2B type 2-E (Histone H2B-GL105) (Histone H2B.q) (H2B/q)	0.41	389	287	202	0	no	27	27	R-HSA-5617472;R-HSA-73777;R-HSA-606279;R-HSA-5693565;R-HSA-3214847;R-HSA-977225;R-HSA-427413;R-HSA-171306;R-HSA-5693571;R-HSA-5625886;R-HSA-5334118;R-HSA-5578749;R-HSA-2559586;R-HSA-912446;R-HSA-3214815;R-HSA-69473;R-HSA-201722;R-HSA-1221632;R-HSA-2559582;R-HSA-212300;R-HSA-5693607;R-HSA-2559580;R-HSA-73728;R-HSA-427359;R-HSA-2299718;R-HSA-427389;R-HSA-5250924	27	0	yes	NA	No	4	nucleosome assembly [GO:0006334];antibacterial humoral response [GO:0019731];defense response to Gram-positive bacterium [GO:0050830];innate immune response in mucosa [GO:0002227]	1	DNA binding [GO:0003677]	5	nucleus [GO:0005634];nuclear nucleosome [GO:0000788];extracellular space [GO:0005615];cytoplasm [GO:0005737];nucleoplasm [GO:0005654]
Q05639	Q562R1	Elongation factor 1-alpha 2 (EF-1-alpha-2) (Eukaryotic elongation factor 1 A-2) (eEF1A-2) (Statin-S1)	Beta-actin-like protein 2 (Kappa-actin)	0.41	1397	1613	1316	0	no	1	0	NF	0	0	No	NA	No	0	NF	0	NF	1	cytoplasm [GO:0005737]
P01596	P01599	Ig kappa chain V-I region CAR	Ig kappa chain V-I region Gal	0.41	44	80	39	0	no	14	14	R-HSA-2871796;R-HSA-2730905;R-HSA-166663;R-HSA-173623;R-HSA-2871837;R-HSA-2168880;R-HSA-2454202;R-HSA-2029485;R-HSA-5690714;R-HSA-2871809;R-HSA-198933;R-HSA-2029481;R-HSA-983695;R-HSA-2029482	14	NA	NA	NA	No	0	NA	0	NA	0	NA
Q13228	P05091	Selenium-binding protein 1 (56 kDa selenium-binding protein) (SBP56) (SP56)	Aldehyde dehydrogenase, mitochondrial (EC 1.2.1.3) (ALDH class 2) (ALDH-E2) (ALDHI)	0.41	609	812	506	0	no	0	2	NF	0	0	No	NA	No	0	NF	0	NF	1	extracellular exosome [GO:0070062]
P13535	Q14896	Myosin-8 (Myosin heavy chain 8) (Myosin heavy chain, skeletal muscle, perinatal) (MyHC-perinatal)	Myosin-binding protein C, cardiac-type (Cardiac MyBP-C) (C-protein, cardiac muscle isoform)	0.41	378	193	189	0	no	2	1	R-HSA-390522	1	0	No	NA	No	1	muscle filament sliding [GO:0030049]	1	structural constituent of muscle [GO:0008307]	2	sarcomere [GO:0030017];cytosol [GO:0005829]
P0CG47	A5A3E0	Polyubiquitin-B [Cleaved into: Ubiquitin]	POTE ankyrin domain family member F (ANKRD26-like family C member 1B) (Chimeric POTE-actin protein)	0.41	1428	1691	1361	0	NA	139	0	NF	0	0	No	NA	No	0	NF	1		2	extracellular space [GO:0005615];extracellular exosome [GO:0070062]
Q9H853	Q9BUF5	Putative tubulin-like protein alpha-4B (Alpha-tubulin 4B)	Tubulin beta-6 chain (Tubulin beta class V)	0.41	1161	1253	940	0	no	19	22	R-HSA-68877;R-HSA-190861;R-HSA-2467813;R-HSA-6807878;R-HSA-983189;R-HSA-1445148;R-HSA-190840;R-HSA-5617833;R-HSA-437239;R-HSA-380320;R-HSA-389960;R-HSA-6811436;R-HSA-6811434;R-HSA-2500257;R-HSA-5663220;R-HSA-389977;R-HSA-2132295;R-HSA-8852276;R-HSA-5626467	19	0	No	NA	No	1	microtubule-based process [GO:0007017]	3	GTPase activity [GO:0003924];structural constituent of cytoskeleton [GO:0005200];GTP binding [GO:0005525]	2	cytoplasm [GO:0005737];microtubule [GO:0005874]
P54652	P38646	Heat shock-related 70 kDa protein 2 (Heat shock 70 kDa protein 2)	Stress-70 protein, mitochondrial (75 kDa glucose-regulated protein) (GRP-75) (Heat shock 70 kDa protein 9) (Mortalin) (MOT) (Peptide-binding protein 74) (PBP74)	0.41	1322	1055	863	0	NA	3	2	R-HSA-3371453	1	0	yes	NA	No	0	NF	2	ATP binding [GO:0005524];unfolded protein binding [GO:0051082]	3	myelin sheath [GO:0043209];extracellular exosome [GO:0070062];mitochondrion [GO:0005739]
P62937	Q16695	Peptidyl-prolyl cis-trans isomerase A (PPIase A) (EC 5.2.1.8) (Cyclophilin A) (Cyclosporin A-binding protein) (Rotamase A) [Cleaved into: Peptidyl-prolyl cis-trans isomerase A, N-terminally processed]	Histone H3.1t (H3/t) (H3t) (H3/g)	0.41	816	824	577	0	NA	11	10	NF	0	0	No	NA	Yes	0	NF	0	NF	2	nucleus [GO:0005634];extracellular exosome [GO:0070062]
Q5VTE0	P06576	Putative elongation factor 1-alpha-like 3 (EF-1-alpha-like 3) (Eukaryotic elongation factor 1 A-like 3) (eEF1A-like 3) (Eukaryotic translation elongation factor 1 alpha-1 pseudogene 5)	ATP synthase subunit beta, mitochondrial (EC 3.6.3.14)	0.41	1465	1229	1080	0	no	1	3	NF	0	NA	NA	NA	No	0	NF	0	NF	2	nucleus [GO:0005634];extracellular exosome [GO:0070062]
P0CG38	P04406	POTE ankyrin domain family member I	Glyceraldehyde-3-phosphate dehydrogenase (GAPDH) (EC 1.2.1.12) (Peptidyl-cysteine S-nitrosylase GAPDH) (EC 2.6.99.-)	0.41	1639	1248	1156	0	no	0	2	NF	0	0	No	NA	No	0	NF	0	NF	1	extracellular exosome [GO:0070062]
P53621	P26640	Coatomer subunit alpha (Alpha-coat protein) (Alpha-COP) (HEP-COP) (HEPCOP) [Cleaved into: Xenin (Xenopsin-related peptide); Proxenin]	Valine--tRNA ligase (EC 6.1.1.9) (Protein G7a) (Valyl-tRNA synthetase) (ValRS)	0.41	760	587	433	0	no	2	1	NF	0	0	No	NA	No	0	NF	0	NF	1	cytosol [GO:0005829]
P68133	Q71U36	Actin, alpha skeletal muscle (Alpha-actin-1)	Tubulin alpha-1A chain (Alpha-tubulin 3) (Tubulin B-alpha-1) (Tubulin alpha-3 chain)	0.41	1747	1654	1604	0	no	1	28	NF	0	0	No	NA	No	0	NF	1	structural constituent of cytoskeleton [GO:0005200]	2	cytosol [GO:0005829];extracellular exosome [GO:0070062]
Q9NYU2	P07814	UDP-glucose:glycoprotein glucosyltransferase 1 (UGT1) (hUGT1) (EC 2.4.1.-) (UDP--Glc:glycoprotein glucosyltransferase) (UDP-glucose ceramide glucosyltransferase-like 1)	Bifunctional glutamate/proline--tRNA ligase (Bifunctional aminoacyl-tRNA synthetase) (Cell proliferation-inducing gene 32 protein) (Glutamatyl-prolyl-tRNA synthetase) [Includes: Glutamate--tRNA ligase (EC 6.1.1.17) (Glutamyl-tRNA synthetase) (GluRS); Proline--tRNA ligase (EC 6.1.1.15) (Prolyl-tRNA synthetase)]	0.41	630	650	408	0	NA	1	3	NF	0	0	No	NA	No	0	NF	0	NF	0	NF
P13804	Q16698	Electron transfer flavoprotein subunit alpha, mitochondrial (Alpha-ETF)	2,4-dienoyl-CoA reductase, mitochondrial (EC 1.3.1.34) (2,4-dienoyl-CoA reductase [NADPH]) (4-enoyl-CoA reductase [NADPH]) (Short chain dehydrogenase/reductase family 18C member 1)	0.41	537	686	366	0	no	1	1	NF	0	0	No	NA	No	0	NF	0	NF	3	mitochondrion [GO:0005739];extracellular exosome [GO:0070062];mitochondrial matrix [GO:0005759]
P84243	Q96QV6	Histone H3.3	Histone H2A type 1-A (Histone H2A/r)	0.41	830	805	576	0	no	18	3	NF	0	0	No	NA	No	0	NF	0	NF	4	nuclear chromosome, telomeric region [GO:0000784];nucleus [GO:0005634];nucleosome [GO:0000786];extracellular exosome [GO:0070062]
P00338	P08758	L-lactate dehydrogenase A chain (LDH-A) (EC 1.1.1.27) (Cell proliferation-inducing gene 19 protein) (LDH muscle subunit) (LDH-M) (Renal carcinoma antigen NY-REN-59)	Annexin A5 (Anchorin CII) (Annexin V) (Annexin-5) (Calphobindin I) (CBP-I) (Endonexin II) (Lipocortin V) (Placental anticoagulant protein 4) (PP4) (Placental anticoagulant protein I) (PAP-I) (Thromboplastin inhibitor) (Vascular anticoagulant-alpha) (VAC-alpha)	0.41	1044	851	690	0	NA	1	0	NF	0	0	No	NA	Yes	1	positive regulation of apoptotic process [GO:0043065]	0	NF	4	nucleus [GO:0005634];membrane [GO:0016020];cytosol [GO:0005829];extracellular exosome [GO:0070062]
P84243	Q8N257	Histone H3.3	Histone H2B type 3-B (H2B type 12)	0.41	830	1134	718	0	no	18	27	R-HSA-5578749;R-HSA-5617472;R-HSA-912446;R-HSA-73777;R-HSA-201722;R-HSA-2559582;R-HSA-212300;R-HSA-977225;R-HSA-427413;R-HSA-2559580;R-HSA-427359;R-HSA-73728;R-HSA-5625886;R-HSA-2299718;R-HSA-427389;R-HSA-5250924;R-HSA-5334118	17	0	No	NF	No	1	nucleosome assembly [GO:0006334]	0	NF	3	nucleus [GO:0005634];nuclear nucleosome [GO:0000788];nucleoplasm [GO:0005654]
P02533	Q7Z794	Keratin, type I cytoskeletal 14 (Cytokeratin-14) (CK-14) (Keratin-14) (K14)	Keratin, type II cytoskeletal 1b (Cytokeratin-1B) (CK-1B) (Keratin-77) (K77) (Type-II keratin Kb39)	0.41	707	1011	593	0	no	1	0	NF	0	0	No	NA	No	0	NF	0	NF	2	keratin filament [GO:0045095];extracellular exosome [GO:0070062]
P55072	Q14697	Transitional endoplasmic reticulum ATPase (TER ATPase) (EC 3.6.4.6) (15S Mg(2+)-ATPase p97 subunit) (Valosin-containing protein) (VCP)	Neutral alpha-glucosidase AB (EC 3.2.1.84) (Alpha-glucosidase 2) (Glucosidase II subunit alpha)	0.41	1093	1046	822	0	no	4	2	NF	0	0	No	NA	No	0	NF	1	poly(A) RNA binding [GO:0044822]	1	extracellular exosome [GO:0070062]
Q9BXT8	Q8IWB6	RING finger protein 17 (Tudor domain-containing protein 4)	Inactive serine/threonine-protein kinase TEX14 (Protein kinase-like protein SgK307) (Sugen kinase 307) (Testis-expressed sequence 14) (Testis-expressed sequence 14 protein)	0.41	16	21	12	0	no	0	0	NF	0	0	No	NA	No	0	NF	0	NF	1	cytoplasm [GO:0005737]
P62820	P09211	Ras-related protein Rab-1A (YPT1-related protein)	Glutathione S-transferase P (EC 2.5.1.18) (GST class-pi) (GSTP1-1)	0.4	757	724	494	0	no	4	2	NF	0	0	No	NA	Yes	0	NF	0	NF	2	cytosol [GO:0005829];extracellular exosome [GO:0070062]
Q9Y490	Q15149	Talin-1	Plectin (PCN) (PLTN) (Hemidesmosomal protein 1) (HD1) (Plectin-1)	0.4	1427	1387	1227	0	NA	8	3	NF	0	0	No	NA	No	0	NF	1	cadherin binding involved in cell-cell adhesion [GO:0098641]	6	cell-cell adherens junction [GO:0005913];cytosol [GO:0005829];cytoplasm [GO:0005737];focal adhesion [GO:0005925];plasma membrane [GO:0005886];extracellular exosome [GO:0070062]
Q12906	P19338	Interleukin enhancer-binding factor 3 (Double-stranded RNA-binding protein 76) (DRBP76) (M-phase phosphoprotein 4) (MPP4) (Nuclear factor associated with dsRNA) (NFAR) (Nuclear factor of activated T-cells 90 kDa) (NF-AT-90) (Translational control protein 80) (TCP80)	Nucleolin (Protein C23)	0.4	742	952	589	0	NA	0	0	NF	0	0	No	3055_Nop56p-associated pre-rRNA complex;3082_DGCR8 multiprotein complex	No	0	NF	2	poly(A) RNA binding [GO:0044822];RNA binding [GO:0003723]	5	nucleus [GO:0005634];intracellular ribonucleoprotein complex [GO:0030529];nucleolus [GO:0005730];nucleoplasm [GO:0005654];membrane [GO:0016020]
Q6PEY2	P68366	Tubulin alpha-3E chain (Alpha-tubulin 3E)	Tubulin alpha-4A chain (Alpha-tubulin 1) (Testis-specific alpha-tubulin) (Tubulin H2-alpha) (Tubulin alpha-1 chain)	0.4	1105	1223	882	0	no	19	29	R-HSA-68877;R-HSA-190861;R-HSA-2467813;R-HSA-6807878;R-HSA-983189;R-HSA-1445148;R-HSA-190840;R-HSA-5617833;R-HSA-437239;R-HSA-380320;R-HSA-389960;R-HSA-6811436;R-HSA-6811434;R-HSA-2500257;R-HSA-5663220;R-HSA-389977;R-HSA-2132295;R-HSA-8852276;R-HSA-5626467	19	0	yes	NA	No	1	microtubule-based process [GO:0007017]	3	GTPase activity [GO:0003924];structural constituent of cytoskeleton [GO:0005200];GTP binding [GO:0005525]	1	microtubule [GO:0005874]
Q14980	Q6P2Q9	Nuclear mitotic apparatus protein 1 (NuMA protein) (Nuclear matrix protein-22) (NMP-22) (SP-H antigen)	Pre-mRNA-processing-splicing factor 8 (220 kDa U5 snRNP-specific protein) (PRP8 homolog) (Splicing factor Prp8) (p220)	0.4	842	603	520	0	no	1	2	NF	0	0	No	NF	No	0	NF	0	NF	2	nucleus [GO:0005634];nucleoplasm [GO:0005654]
A6NNZ2	Q9NY65	Tubulin beta-8 chain-like protein LOC260334	Tubulin alpha-8 chain (Alpha-tubulin 8) (Tubulin alpha chain-like 2)	0.4	1040	1528	982	0	no	17	19	R-HSA-68877;R-HSA-190861;R-HSA-2467813;R-HSA-6807878;R-HSA-983189;R-HSA-1445148;R-HSA-190840;R-HSA-5617833;R-HSA-437239;R-HSA-380320;R-HSA-6811436;R-HSA-6811434;R-HSA-2500257;R-HSA-5663220;R-HSA-2132295;R-HSA-8852276;R-HSA-5626467	17	NA	NA	NA	No	1	microtubule-based process [GO:0007017]	3	GTPase activity [GO:0003924];structural constituent of cytoskeleton [GO:0005200];GTP binding [GO:0005525]	2	cytoplasm [GO:0005737];microtubule [GO:0005874]
P68032	Q71U36	Actin, alpha cardiac muscle 1 (Alpha-cardiac actin)	Tubulin alpha-1A chain (Alpha-tubulin 3) (Tubulin B-alpha-1) (Tubulin alpha-3 chain)	0.4	1749	1654	1606	0	no	1	28	NF	0	0	No	NA	No	0	NF	0	NF	2	cytosol [GO:0005829];extracellular exosome [GO:0070062]
P31948	P31939	Stress-induced-phosphoprotein 1 (STI1) (Hsc70/Hsp90-organizing protein) (Hop) (Renal carcinoma antigen NY-REN-11) (Transformation-sensitive protein IEF SSP 3521)	Bifunctional purine biosynthesis protein PURH [Cleaved into: Bifunctional purine biosynthesis protein PURH, N-terminally processed] [Includes: Phosphoribosylaminoimidazolecarboxamide formyltransferase (EC 2.1.2.3) (5-aminoimidazole-4-carboxamide ribonucleotide formyltransferase) (AICAR transformylase); IMP cyclohydrolase (EC 3.5.4.10) (ATIC) (IMP synthase) (Inosinicase)]	0.4	618	601	405	0	no	0	1	NF	0	0	No	NA	No	0	NF	0	NF	0	NF
Q6PEY2	Q562R1	Tubulin alpha-3E chain (Alpha-tubulin 3E)	Beta-actin-like protein 2 (Kappa-actin)	0.4	1579	1613	1464	0	no	19	0	NF	0	0	No	NA	No	0	NF	0	NF	1	cytoplasm [GO:0005737]
P11047	Q9Y6C2	Laminin subunit gamma-1 (Laminin B2 chain) (Laminin-1 subunit gamma) (Laminin-10 subunit gamma) (Laminin-11 subunit gamma) (Laminin-2 subunit gamma) (Laminin-3 subunit gamma) (Laminin-4 subunit gamma) (Laminin-6 subunit gamma) (Laminin-7 subunit gamma) (Laminin-8 subunit gamma) (Laminin-9 subunit gamma) (S-laminin subunit gamma) (S-LAM gamma)	EMILIN-1 (Elastin microfibril interface-located protein 1) (Elastin microfibril interfacer 1)	0.4	767	743	512	0	no	5	1	NF	0	0	No	NF	No	1	cell adhesion [GO:0007155]	0	NF	3	extracellular region [GO:0005576];extracellular matrix [GO:0031012];extracellular exosome [GO:0070062]
Q9Y265	Q9Y230	RuvB-like 1 (EC 3.6.4.12) (49 kDa TATA box-binding protein-interacting protein) (49 kDa TBP-interacting protein) (54 kDa erythrocyte cytosolic protein) (ECP-54) (INO80 complex subunit H) (Nuclear matrix protein 238) (NMP 238) (Pontin 52) (TIP49a) (TIP60-associated protein 54-alpha) (TAP54-alpha)	RuvB-like 2 (EC 3.6.4.12) (48 kDa TATA box-binding protein-interacting protein) (48 kDa TBP-interacting protein) (51 kDa erythrocyte cytosolic protein) (ECP-51) (INO80 complex subunit J) (Repressing pontin 52) (Reptin 52) (TIP49b) (TIP60-associated protein 54-beta) (TAP54-beta)	0.4	472	455	277	1	yes	5	2	R-HSA-171319;R-HSA-3214847	2	0	No	525_TIP60 histone acetylase complex;787_NuA4/Tip60-HAT complex B;798_NuA4/Tip60-HAT complex A;1173_TIP49-TIP48-BAF53 complex;1166_p400-associated complex;799_DMAP1-associated complex;781_URI complex (Unconventional prefoldin RPB5 Interactor);1170_cMYC-ATPase-helicase complex;304_SRCAP-associated chromatin remodeling complex;302_INO80 chromatin remodeling complex;529_NuA4/Tip60 HAT complex	No	9	regulation of growth [GO:0040008];DNA recombination [GO:0006310];DNA repair [GO:0006281];chromatin remodeling [GO:0006338];histone H4 acetylation [GO:0043967];histone H2A acetylation [GO:0043968];transcription, DNA-templated [GO:0006351];box C/D snoRNP assembly [GO:0000492];positive regulation of telomerase RNA localization to Cajal body [GO:1904874]	3	ATP-dependent 5'-3' DNA helicase activity [GO:0043141];ATP binding [GO:0005524];DNA helicase activity [GO:0003678]	11	R2TP complex [GO:0097255];extracellular exosome [GO:0070062];MLL1 complex [GO:0071339];NuA4 histone acetyltransferase complex [GO:0035267];nucleoplasm [GO:0005654];cytoplasm [GO:0005737];nuclear matrix [GO:0016363];Ino80 complex [GO:0031011];Swr1 complex [GO:0000812];membrane [GO:0016020];nucleus [GO:0005634]
Q562R1	P68104	Beta-actin-like protein 2 (Kappa-actin)	Elongation factor 1-alpha 1 (EF-1-alpha-1) (Elongation factor Tu) (EF-Tu) (Eukaryotic elongation factor 1 A-1) (eEF1A-1) (Leukocyte receptor cluster member 7)	0.4	1613	1467	1374	0	no	0	3	NF	0	0	No	NA	No	0	NF	0	NF	3	extracellular space [GO:0005615];cytoplasm [GO:0005737];extracellular exosome [GO:0070062]
P62987	Q5VTE0	Ubiquitin-60S ribosomal protein L40 (CEP52) (Ubiquitin A-52 residue ribosomal protein fusion product 1) [Cleaved into: Ubiquitin; 60S ribosomal protein L40]	Putative elongation factor 1-alpha-like 3 (EF-1-alpha-like 3) (Eukaryotic elongation factor 1 A-like 3) (eEF1A-like 3) (Eukaryotic translation elongation factor 1 alpha-1 pseudogene 5)	0.4	1429	1465	1214	0	NA	150	1	NF	0	NA	NA	NA	No	0	NF	0	NF	3	nucleus [GO:0005634];extracellular space [GO:0005615];extracellular exosome [GO:0070062]
Q02252	P49419	Methylmalonate-semialdehyde dehydrogenase [acylating], mitochondrial (MMSDH) (Malonate-semialdehyde dehydrogenase [acylating]) (EC 1.2.1.18) (EC 1.2.1.27) (Aldehyde dehydrogenase family 6 member A1)	Alpha-aminoadipic semialdehyde dehydrogenase (Alpha-AASA dehydrogenase) (EC 1.2.1.31) (Aldehyde dehydrogenase family 7 member A1) (EC 1.2.1.3) (Antiquitin-1) (Betaine aldehyde dehydrogenase) (EC 1.2.1.8) (Delta1-piperideine-6-carboxylate dehydrogenase) (P6c dehydrogenase)	0.4	548	507	341	0	no	1	2	NF	0	0	No	NA	No	0	NF	1	aldehyde dehydrogenase (NAD) activity [GO:0004029]	3	mitochondrion [GO:0005739];extracellular exosome [GO:0070062];mitochondrial matrix [GO:0005759]
P62736	P68363	Actin, aortic smooth muscle (Alpha-actin-2) (Cell growth-inhibiting gene 46 protein)	Tubulin alpha-1B chain (Alpha-tubulin ubiquitous) (Tubulin K-alpha-1) (Tubulin alpha-ubiquitous chain)	0.4	1743	1662	1608	0	no	1	21	NF	0	0	No	NF	No	0	NF	0	NF	1	extracellular exosome [GO:0070062]
Q562R1	Q5VTE0	Beta-actin-like protein 2 (Kappa-actin)	Putative elongation factor 1-alpha-like 3 (EF-1-alpha-like 3) (Eukaryotic elongation factor 1 A-like 3) (eEF1A-like 3) (Eukaryotic translation elongation factor 1 alpha-1 pseudogene 5)	0.4	1613	1465	1372	0	no	0	1	NF	0	NA	NA	NA	No	1		0	NF	3	extracellular space [GO:0005615];cytoplasm [GO:0005737];extracellular exosome [GO:0070062]
Q93009	Q9P2J5	Ubiquitin carboxyl-terminal hydrolase 7 (EC 3.4.19.12) (Deubiquitinating enzyme 7) (Herpesvirus-associated ubiquitin-specific protease) (Ubiquitin thioesterase 7) (Ubiquitin-specific-processing protease 7)	Leucine--tRNA ligase, cytoplasmic (EC 6.1.1.4) (Leucyl-tRNA synthetase) (LeuRS)	0.4	411	405	233	0	no	5	2	NF	0	0	No	NA	No	0	NF	0	NF	2	nucleus [GO:0005634];cytosol [GO:0005829]
P08133	P38646	Annexin A6 (67 kDa calelectrin) (Annexin VI) (Annexin-6) (Calphobindin-II) (CPB-II) (Chromobindin-20) (Lipocortin VI) (Protein III) (p68) (p70)	Stress-70 protein, mitochondrial (75 kDa glucose-regulated protein) (GRP-75) (Heat shock 70 kDa protein 9) (Mortalin) (MOT) (Peptide-binding protein 74) (PBP74)	0.4	1249	1079	915	0	NA	1	2	NF	0	0	No	NA	No	0	NF	0	NF	3	focal adhesion [GO:0005925];extracellular exosome [GO:0070062];mitochondrion [GO:0005739]
P62987	P04259	Ubiquitin-60S ribosomal protein L40 (CEP52) (Ubiquitin A-52 residue ribosomal protein fusion product 1) [Cleaved into: Ubiquitin; 60S ribosomal protein L40]	Keratin, type II cytoskeletal 6B (Cytokeratin-6B) (CK-6B) (Keratin-6B) (K6B) (Type-II keratin Kb10)	0.4	1429	975	890	0	NA	150	0	NF	0	0	No	NA	No	0	NF	0	NF	1	extracellular exosome [GO:0070062]
P35241	P13667	Radixin	Protein disulfide-isomerase A4 (EC 5.3.4.1) (Endoplasmic reticulum resident protein 70) (ER protein 70) (ERp70) (Endoplasmic reticulum resident protein 72) (ER protein 72) (ERp-72) (ERp72)	0.4	1127	811	641	0	no	1	0	NF	0	0	No	NA	No	0	NF	1	poly(A) RNA binding [GO:0044822]	0	NF
Q9H853	P0CG48	Putative tubulin-like protein alpha-4B (Alpha-tubulin 4B)	Polyubiquitin-C [Cleaved into: Ubiquitin]	0.4	1161	1428	986	0	NA	19	139	R-HSA-2467813;R-HSA-8852276	2	0	No	NA	No	0	NF	0	NF	0	NF
Q9H853	P0CG47	Putative tubulin-like protein alpha-4B (Alpha-tubulin 4B)	Polyubiquitin-B [Cleaved into: Ubiquitin]	0.4	1161	1428	986	0	NA	19	139	R-HSA-2467813;R-HSA-8852276	2	0	No	NA	No	0	NF	0	NF	0	NF
P07195	P04075	L-lactate dehydrogenase B chain (LDH-B) (EC 1.1.1.27) (LDH heart subunit) (LDH-H) (Renal carcinoma antigen NY-REN-46)	Fructose-bisphosphate aldolase A (EC 4.1.2.13) (Lung cancer antigen NY-LU-1) (Muscle-type aldolase)	0.4	1087	1132	874	0	no	1	3	NF	0	0	No	NA	No	0	NF	0	NF	3	membrane [GO:0016020];cytosol [GO:0005829];extracellular exosome [GO:0070062]
P00558	P06576	Phosphoglycerate kinase 1 (EC 2.7.2.3) (Cell migration-inducing gene 10 protein) (Primer recognition protein 2) (PRP 2)	ATP synthase subunit beta, mitochondrial (EC 3.6.3.14)	0.4	1111	1229	980	0	no	2	3	NF	0	0	No	NA	No	0	NF	1	ATP binding [GO:0005524]	2	extracellular exosome [GO:0070062];membrane [GO:0016020]
P21796	Q16698	Voltage-dependent anion-selective channel protein 1 (VDAC-1) (hVDAC1) (Outer mitochondrial membrane protein porin 1) (Plasmalemmal porin) (Porin 31HL) (Porin 31HM)	2,4-dienoyl-CoA reductase, mitochondrial (EC 1.3.1.34) (2,4-dienoyl-CoA reductase [NADPH]) (4-enoyl-CoA reductase [NADPH]) (Short chain dehydrogenase/reductase family 18C member 1)	0.4	860	686	530	0	no	2	1	NF	0	0	No	NA	No	0	NF	0	NF	3	nucleus [GO:0005634];extracellular exosome [GO:0070062];mitochondrion [GO:0005739]
Q05707	P12110	Collagen alpha-1(XIV) chain (Undulin)	Collagen alpha-2(VI) chain	0.4	775	818	607	0	NA	2	7	R-HSA-1442490;R-HSA-1650814	2	0	No	NA	No	1	extracellular matrix organization [GO:0030198]	0	NF	6	endoplasmic reticulum lumen [GO:0005788];extracellular exosome [GO:0070062];proteinaceous extracellular matrix [GO:0005578];extracellular space [GO:0005615];collagen trimer [GO:0005581];extracellular region [GO:0005576]
P62805	P0C0S8	Histone H4	Histone H2A type 1 (H2A.1) (Histone H2A/p)	0.4	1115	927	790	0	no	30	3	R-HSA-3214847;R-HSA-3214815;R-HSA-3214858	3	0	No	NA	No	0	NF	1	DNA binding [GO:0003677]	3	nucleus [GO:0005634];nucleosome [GO:0000786];extracellular exosome [GO:0070062]
P0CG38	Q13509	POTE ankyrin domain family member I	Tubulin beta-3 chain (Tubulin beta-4 chain) (Tubulin beta-III)	0.4	1639	1390	1279	0	no	0	22	NF	0	0	No	NA	No	0	NF	0	NF	1	extracellular exosome [GO:0070062]
Q93079	Q16778	Histone H2B type 1-H (Histone H2B.j) (H2B/j)	Histone H2B type 2-E (Histone H2B-GL105) (Histone H2B.q) (H2B/q)	0.4	399	305	212	0	no	27	27	R-HSA-5617472;R-HSA-73777;R-HSA-606279;R-HSA-5693565;R-HSA-3214847;R-HSA-977225;R-HSA-427413;R-HSA-171306;R-HSA-5693571;R-HSA-5625886;R-HSA-5334118;R-HSA-5578749;R-HSA-2559586;R-HSA-912446;R-HSA-3214815;R-HSA-69473;R-HSA-201722;R-HSA-1221632;R-HSA-2559582;R-HSA-212300;R-HSA-5693607;R-HSA-2559580;R-HSA-73728;R-HSA-427359;R-HSA-2299718;R-HSA-427389;R-HSA-5250924	27	0	yes	NA	No	1	nucleosome assembly [GO:0006334]	1	DNA binding [GO:0003677]	6	nuclear nucleosome [GO:0000788];extracellular exosome [GO:0070062];nucleoplasm [GO:0005654];cytoplasm [GO:0005737];nucleus [GO:0005634];nucleosome [GO:0000786]
P53621	Q08211	Coatomer subunit alpha (Alpha-coat protein) (Alpha-COP) (HEP-COP) (HEPCOP) [Cleaved into: Xenin (Xenopsin-related peptide); Proxenin]	ATP-dependent RNA helicase A (RHA) (EC 3.6.4.13) (DEAH box protein 9) (Leukophysin) (LKP) (Nuclear DNA helicase II) (NDH II)	0.4	760	887	568	0	no	2	5	NF	0	0	No	NA	No	0	NF	0	NF	3	cytoplasm [GO:0005737];cytosol [GO:0005829];membrane [GO:0016020]
Q9BQE3	P62736	Tubulin alpha-1C chain (Alpha-tubulin 6) (Tubulin alpha-6 chain)	Actin, aortic smooth muscle (Alpha-actin-2) (Cell growth-inhibiting gene 46 protein)	0.4	1659	1743	1608	0	no	22	1	NF	0	0	No	NF	No	0	NF	0	NF	1	cytoplasm [GO:0005737]
Q562R1	Q9NY65	Beta-actin-like protein 2 (Kappa-actin)	Tubulin alpha-8 chain (Alpha-tubulin 8) (Tubulin alpha chain-like 2)	0.4	1613	1528	1413	0	no	0	19	NF	0	0	No	NA	No	0	NF	0	NF	1	cytoplasm [GO:0005737]
P33176	P53396	Kinesin-1 heavy chain (Conventional kinesin heavy chain) (Ubiquitous kinesin heavy chain) (UKHC)	ATP-citrate synthase (EC 2.3.3.8) (ATP-citrate (pro-S-)-lyase) (ACL) (Citrate cleavage enzyme)	0.4	620	658	403	0	no	5	2	NF	0	0	No	NA	No	0	NF	1	ATP binding [GO:0005524]	2	cytoplasm [GO:0005737];membrane [GO:0016020]
Q9BQE3	P68032	Tubulin alpha-1C chain (Alpha-tubulin 6) (Tubulin alpha-6 chain)	Actin, alpha cardiac muscle 1 (Alpha-cardiac actin)	0.4	1659	1749	1613	0	no	22	1	NF	0	0	No	NA	No	0	NF	0	NF	1	cytoplasm [GO:0005737]
P98160	P02751	Basement membrane-specific heparan sulfate proteoglycan core protein (HSPG) (Perlecan) (PLC) [Cleaved into: Endorepellin; LG3 peptide]	Fibronectin (FN) (Cold-insoluble globulin) (CIG) [Cleaved into: Anastellin; Ugl-Y1; Ugl-Y2; Ugl-Y3]	0.4	965	901	743	1	NA	15	14	R-HSA-3000171;R-HSA-1474228;R-HSA-216083	3	0	No	NA	No	3	extracellular matrix organization [GO:0030198];angiogenesis [GO:0001525];extracellular matrix disassembly [GO:0022617]	0	NF	4	extracellular region [GO:0005576];extracellular matrix [GO:0031012];extracellular space [GO:0005615];extracellular exosome [GO:0070062]
[truncated: 157 more rows]
